# Supplementary material
Source: HighWire-hosted journal article supplement (doi:10.1101/rna.059642.116)
Supplement: Supplemental_Legends.docx [file Supplemental_Legends.docx]

## **Supplementary Information**

Supplemental_Fig_S1.pdf: Genomic localization of putative 5S rRNA genes

Supplemental_Fig_S2.pdf: Genomic distribution of putative 5S rRNA genes

Supplemental_Fig_S3.pdf: Clustering of all unique expressed 5S rRNA genes

Supplemental_Fig_S4.pdf: Comparing the expressed 5S rRNA variant genes

Supplemental_Fig_S5.pdf: Confirming specific expression of 5S rRNA types by quantitative real-time PCR

Supplemental_Fig_S6.pdf: Comparing the 5S rRNA types

Supplemental_Fig_S7.pdf: Confirming rDNA copy number of 5S rRNA types by quantitative real-time PCR

Supplemental_Fig_S8.pdf: Genomic organization of expressed Maternal-Type 5S rDNA on chromosome 4

Supplemental_Fig_S9.pdf: All MutsuDr elements alignment

Supplemental_Fig_S10.pdf: Alignment of the two MutsuDr ORF proteins

Supplemental_Fig_S11.pdf: Strand distribution of the piRNAs mapping to MutsuDr

Supplemental_File_S1.fa: All MutsuDr elements on 5S rDNA clusters

Supplemental_Table_S1.xlsx: Overview of all putative 5S rRNA genes present in the zebrafish genome

Supplemental_Table_S2.xlsx: Percentage 5S rRNA variant read count of total number of 5S rRNA read count per analyzed sample

Supplemental_Table_S3.xlsx: Expression of maternal and somatic-type 5S rRNA in *Xenopus* laevis

Supplemental_Table_S4.xlsx: Complete MutsuDr retrotransposons in the 5S rRNA genome regions

Supplemental_Table_S5.xlsx: RNA-seq read counts of MutsuDr

Supplemental_Table_S6.xlsx: Small RNA-seq read counts of piRNAs that target MutsuDr retrotransposons

Supplemental_Table_S7.xlsx: PCR primers and Northern blot DNA probes
