# Supplementary material
Source: HighWire-hosted journal article supplement (doi:10.1101/rna.059642.116)
Supplement: Supplemental_Table_S1.xlsx [file Supplemental_Table_S1.xlsx]

## Sheet: 5S rRNA genomic variants
Supplementary Table S1: Overview of all putative 5S rRNA genes present in the zebrafish genome
Order	Name expressed genes	Chromosome	Start	End	Strand	Sequence
1		1	720358	720472	plus	GTGCCGGCAGCAGCTCTCGGCAACTCTCACATGGTCGCCCACTGAAGCTAAGCAGGGCTGCGCCTGGTCAGTACCTGGATGGGAGACCACATGGGAAAGTGAGGTTGCTGTCGGA
2		1	983442	983565	plus	CGCCACAGCCATATCACCCTGCAGCCCAAGACCGGTTACTCACTGAAGCTAAGCAGGGCTGAGCCTGGTCAGTACCTGGATGGGAGACCACTAGGGGACACTAGGTTGCTGTTAGAAGTGGTGT
3		1	1039112	1039235	minus	TGCCACAGCCATATCACCCTGCAGCCCAAGACCGGTTACTCACTGAAGCTAAGCAGGGCTGAGCCTGGTCAGTACCTGGATAGGAGCCCACTAGGGAGCACTAGGTTGCTGTTGGAAGTGGTGT
4		1	1107290	1107408	plus	TTTAGCCAGCAGCTAGCTCTTTGCAATTCTCACATGGTCACCCAGTGAAGCTAAGCAGGGCTGCGCCCGGTCAGTACCTGGATGGGAGACCACATGGGAAAGCTATGTTGCTGCCGGAA
5		1	1149838	1149951	plus	TGGCAGCTAGCTGTCTGCAACTCTCACATGGTCGCCCACTGAAGCTAAGCAGGGCTGTGCTCGGTCAGTAGCTGGATGGGAGACCACATGGGGAAAGCTATTTTGCTGCTGGAA
6		1	1609836	1609961	plus	ACTGACAAACAGCCGGCAGCTAGCTCTCTGCAACTCTCACATGCTCGCCCACTGAAGCTAAGCAGGGCTGCGCCCGGTCAGTACCTGGATGGGAGACCACATGGGAAAGCTAGGTTGCTGCCGGAA
7		1	1887636	1887760	plus	CAGTCATCTTGCCGGCAGCTAGCTCTCTGCAACTCTCACATGCTCGCCCACTGAAGCTAAGCAGGGCTGCGCCCGGTCAGTATCTGGATGGGAGACCACATGGGAAAGCTAGGATGCTGCCGGAA
8		1	2255309	2255433	plus	TCAGGTGGCCTTAAACTAGCTAGCAGCTAGCTCTCTGACACTCTCACATGGTCGCCCACTGAAGCTAAGCAGGGCAGTACCTGGATGGGAGACCACATAGGAAAGCTAAGTTGCTGCCGGAAGTG
9		1	2386273	2386384	minus	GGCAGCTAGCTCTCTGCAACTCTCACATGGTCTCCCACTGAAGCCAAGTTGGGCTGCGGCCGGTCAGTACCTGGATGCAAAACCAATGGGAAAGCTAGGTTGCTGCCGGAAG
10		1	2419765	2419890	plus	TAAGCCACAGCCATGTCACCCTGCAGCCCAAGACCGGTTACTCACTGAAGCTAAGCAGGGCTGAGCCTGGTCAGTACCTGGATGGGAGACCACTAGGGAACACTGGGTTGCTGTTGGAAGTGGTGT
11		1	2506704	2506819	plus	ATTTGCCGGCAGCTAACTCTCTGCAACTCTCACATGGTCGCCCACTAAGCAGGACTGTACCCGGTCAGCACCTGGATGGGAGACCACATGGGAAAGCTAGGTTGCTGCCGGAAGTG
12		1	2768275	2768395	plus	TCTGCCGGCAGCTAGCTCTCTGCAACTCTCACTTGGTCGCCCACTAAAGCTAAGCAGGGCTGCGCCCGGTCAGTACCTGGATGGGAGACCACATGGGAAAGCTAGGTTGCTGCCGGAAGTG
13		1	3007767	3007885	minus	TTTAGCCGACAACTAGCTCTCTGTAATTCTCACATGGTCGCCCACTGAAGCTAAGCAGGGCTGCTCCTGGTCAGTACCTGGATGGGAGACCACATGGGAAAGCTAGGATGCTGCCGGAA
14		1	3123439	3123558	plus	CATTGCCGGCAGCTAGCTCTCTGCAACTCTCACATGGTCAACCACTGAAGCTAAGCAGGGCTGCGCCCGGTCAGTACCTGGATGGGAGACCACATGCGAAAGCTAGGTTGCTGTCGGAAG
15		1	3225902	3226020	plus	TAGCCGGCAGCTAACTCTCTGCAACTCCCACATGGTCATCCATTGAAGCTAAGCAGGGCTGCGCCTGGTCAGTACCTGGATGGGAGACCTCATGGAGAGCTAGGTTGCTGCGGAAAGTG
16		1	3362110	3362224	plus	CTTGCAGGCAGCTAGCTCTCTGCAACTCTCACATGGTCACAATCTGAAGCTAAGCAGGGCTGCGGTCAGTACCTGAATGGGAGACCACATGGGAAAGCTAGGTTGCTGCCAGAAG
17		1	3508041	3508161	minus	ATAAAACCGGCAGCTAGCTCTCTGCAACTCTCACATGGTCGCCCACTGAAGCTAAGCAGGGCTGCACCCGGTCAGTACCGGGATGGGAGACCACATGGGAAAGCTAGGATGCTGCCGGAAG
18		1	3546138	3546247	plus	AGCCACATTCATATAACCCTGCAGCCCAAGACCGGTTGATCTCTGAAGCTAAGCAGGGCTGAGCCTGGTCAGTACCTGGATGGGAGACCACATGGGCAAACTAAATTGCT
19		1	3977260	3977384	minus	TATCCACAGCCATGTCACCCTGCAGCCCAAGACCGGTTACTCACTGAAGCTAAGCAGGGCTGAGCCTGGTCAGTACCTGGATGGGAGACCACTTGGGAACACTAGGTTGCTGTTGGAAGTGGTGT
20		1	4040002	4040122	plus	ATTTGCTGGCAGCTAGCTCTCTGCAACTCTCACTTGGTCGCCCACTGAAGCTAAGCAGGGCTGTGCCCAGTCAGTACCTGGATGGGAGACCACATGGGAAAGCTAGGTTGCTGCCGGAAGT
21		1	4205558	4205681	plus	AACCACAGCCATGTCACCCTGCAGCCCAAGACCAGTTACTCACTGAAGCTAAGCAGGGCTGAGCCTGGTTGGTACCTGGATGGGAGACCACAAGGGAACACTAGGTTGCTGTTGGAAGTGGTGT
22		1	4362425	4362542	minus	TTAAACAGCGATATAACCCTGCAGTCCAAAGACTGGTTACTTACTGAAACTAAGCAGGGCTGAGCCTGGTAAGTACCTGGATGGGAGACCACATGAAAACACTAGGTTGCTGTTGGAA
23		1	4636883	4637009	minus	ACTAAAATTGCTGACAGCTAGGTCTCTGCATCTCTCACATGGTCGCCCACTGAAGCTAAGTAGGGCTGTGCCTGGTCAGTACCTGGATGGGAGACCACATGGGAAAGCTAGGTTGCTGCCGGAAGTG
24		1	5007186	5007297	plus	AGCCACAGCCATATCACCCTGCAGCCCAAGGTTACCTATGAAGCTAAGCAGCGCTGAGCCTGGTCAGTACCTGATGGGAGACCACATGGGAAAGCTAGGTTGCGGTTGGAAG
25		1	5265091	5265206	minus	CTGCCATGTCATCCTGCAGCCCAAGACTGGCTACTCACTGAAGCTAAGCAGGGCTGAGCCTGGTCAGTACCTAATGGGAGACCAGTAGAAAACTAGGTTGCTGTTGGAAGTTGTGT
26		1	5605726	5605843	plus	TAGCCGGCAGCTAGCTCTCTGCAACTCTCACATGGTCTCCCACTGATGCGAAGCAGGGCTGCGGCTGGTCAGTATCTGGATGGGACACCACATGGGAAAGCTAGGTTGCTGCCAAAAA
27		1	5755414	5755532	minus	GCTGGCAGCTAGCTCTCTGCAACTCTCATATGGTCGCCCACTGTAGCTAAGCAGGGCTGCACCTGGTCTTTACCTTGATGGGAGACCACATGATAAAAGCTAGGTTGATGCTGGAAGTG
28		1	6103973	6104089	plus	TAATGTCCAGCAGCTAGCGCTCTGCAACTCTCACATGGTTACCCATTGAAGCTAAGCAGGGCTGCGCTTGGTCTGTACCTGAATTGGAGACCACATGGGAAAGCTAGGTTGCTGCCG
29		1	6231086	6231209	plus	TGCCACAGCCATATCACCCTGCAGCCCAAGACCGGTTAGTCACTGAAGCTAAGCAGGGCTGAGCCTGGTTAGTACCTGGATGGGAGACCACTAGGGAACACTAGGTTGCTGTTGGAAGTGGTGT
30		1	6578418	6578523	plus	CATTAGCCGGCAGCTAGCTCTCTCAGATGGTCGCCTACTAAAGCTAAGCAGGGCTGCGCCCGATTAATACCTGGATGGGAGACCACATGGGAAAGCCAGGTTACTG
31		1	7118095	7118201	minus	AGCTAGCTCTCTGCAACTCTCATATGGTTGCCCACTGAAGCTAAGCAGGGCTGCGCCTGGTCCTGGATGGGAGACCACATTGGAAAGCTTGGTTGTTGTTGGAAGTG
32		1	7199426	7199552	plus	TCAGGATCTCAGCCGGCAGCTAGCTCTCTGCAACTCTCACATGGTCGCCCACTGAAGCTAAGCAGGGCTGCGCCCGGTCAGTACCTGGATGGGAGACCACTTGGGAAAGCTAGGTTGCTGCCGGAAG
33		1	7288101	7288227	minus	GTATACAGCCATGTCACCCTGCAGCCCAAGACTGGTTACTCACTGAAGCTAAGCAGGGCTGAGCCTGGTCAGTACCTGGATGGGAGACCACTAGGGAACACTAGGTTGCTGTTGGAAGTGGTGTTAG
34		1	7325962	7326079	minus	ATGCCGGCAGCTAGCTCTCTGCAACTCTCACATGGTCGCCCACTGAAGCTAAGCAGGGCTGCGCCCGGTCAGTACCTGGATGGGAGACCACTTGGGAAAGCTAGGTTGCTGCCGGAAG
35		1	7993210	7993332	minus	AGCTCTCTGGCAGCTAGCTCTCTGCAACTCTCACATGGTCGCCCACTGAAGCTAAGCAGCGCTGCGCCTGGTCAGTACCTGGATGGGAGACCACATGGGAAAGCTAGGTTGCTGCCGGAAGTG
36		1	8662846	8662969	minus	TGCCACGGCCATGTCATCCTGCATCCCTAGACCGGTTACTCACTGAAGTTAAGCAGGGCTGAGCCTGGTCAGTACCTGGATGGGAGACCACAAGGGAACACTAGGTTGCTGTTGGAAGTGGTGT
37		1	8763662	8763776	minus	TCCACAGTCATATCACCCTGCAGCCCAAGACAGTTACTCACTGAAGCTAAGCAGGGCTGAGCCTGGTCAGTACCTGGATGGGAGACCACTTGGGAACACTAGGTTGCTGTTGGAA
38		1	8788789	8788907	plus	AATACCGGCAGCTAGCTCTCTGCAACTCTCACATGGTCGCCCACTGAAGCTAAGCAGGGCTGCGCCCGGTCAGTACCTGGATGGGAGACCACTTGGGAAAGCTAGGTTGCTGCCGGAAG
39		1	9234687	9234804	plus	AGCCACAGCCATATCACCCTGCAGCCCAGAACCGGTTACTCACTGAAGCTAAGCCGGGCTGAGCCTGGTCAGTTTCTGGATGGGAGACCACATGGGAAAACTAGGTTGCTTTTGGAAG
40		1	9334945	9335052	plus	AAGCTAGCTCTCTGCAACTATCACATGGTCGTCCACTGAAGCTAAGCAGGGCTGCGCCCGGTCAGTTCCTGGATGGGAGACCACATGAGAAAGAGGTTGTTGCCGGAA
41		1	9679609	9679740	plus	TCCTTTATTTTGAGCCCTGTAAAGTCATGAAATAAAAACTGATTGCATTGCGACAACCCTAAGCTAAGCAGGGCTGCGCCCGGTCAGTACCTGGATGGGAGACCACATGGGAAAGCTAGGTTGCTGCCGGAA
42		1	9938695	9938819	minus	TTAATATGGCCACATCACCATATTACCCTGCGGCCAAGACCGGTTATTCACTGAAGCTAAGCAGGACTGAAATTGGTTAGTACCTGAATGGGTGACCACATGGGAAAACTAGGTTGCTGTTGGAA
43		1	9947148	9947266	minus	CAGTCATATCACCCTGCAGCCTAAGACCGGTTAATCACTGAAGCTAAGCAGGGCTGAGCCTGGTCAGTACCTGGATGGGAGACCTCTAGGGAACACCAGGGTGCTGTTGGAAGTGGTGT
44		1	10186006	10186130	minus	GTAGGCATCCACATTTATTTGCCTCTCTGCAACTCTCACATGGTTGCCTACTGAAGCTAAACAGGGCTACGCCCGGTCAGTACTTGGATAGGAGACCACATGGGAAAATTAGGTTGCTGCCGGAA
45		1	10275776	10275889	plus	TGCTGGCAGCAGGCTCTCTGCAACTCTCATATGGTCGCCCACTGAAACTACAGGGCTGCGCCCGGTCAGTACCTGGATGGGAGACCATATGGGAAAGCTAGGTTGCTGCTGGAA
46		1	10378410	10378538	minus	TTGCCAACAGCTAGCACTTTGCAACTCTCACATGGTCGCCTACTTGAAGCTAAGCAGGGCTGTGCCCTGTGCTCCTTACAGTACCTGGATTGGAGACCACATGGGAAAGCTAGGTTGCTGCCGGAAGTG
47		1	10782729	10782853	plus	GTAATCTTTCGGCAGCTAGCTCTCTGCAACTCACACATGGTTGCCCACTGAAGCCAAGCAGGGCTGAACCCGGTCAGTACCTGGATTGGAGACCACATGGGAAAGCTAGGTTGCTGCTGGAAGTG
48		1	11113466	11113586	minus	TTTAGCCACAGCCATATTACCCTGCAGCCAAGACCGGTTACTCACTGAAGCTAAGCAGGGCTGAGCCTGGTCAGTACATAGATGGGAGACCAGATGGGAAAAGTAGGTTGCTGTTGGAAGT
49		1	11236531	11236642	plus	ATGCCGGCAGCTTGCTCTCTGCATCTCTCCTATGGTCGCCCACTGAAGCTAAGCAAGGCTGCGCCTTGTCAGTACCAGGAGACCACATGGGAAAGCTACGATGCTGCTGGAA
50		1	11744528	11744643	plus	GTTGGCAGCTAGCTCTCTGCAACTCTCACATGGTCACTCACTGAAGTTAAGCAGGGATACGCCCGGTCAGTACTTGGAAGGGAGACCACACGGGAAAGCTGGGTTGCTGTCAGAAG
51		1	11856559	11856682	plus	TTTTCCAGCCTTATCACCCTGCAACCCAAAACCGGTTGCTCACTGAAGCTAAGCAGGGCTGAGCCTGGTCAGTACCTGGATGGGAGACCATATGGGAAAACTAGGTTGTTGTTGAAAGTGGTGT
52		1	11939796	11939905	plus	CAGCCATACAATCTGCAAACTAAAACCGGATACTCACTGAGCTAAGCAAGGCTGAACCTGGTCAGTACCTGGATGGGAGACTACATGGGAAAACTAGGTTCCTGTTTGAA
53		1	11943090	11943210	minus	TAAACAGCCAGCAGCTAGCTCTCTGCAACTCTCACATGGTCGCCCACTGGAGCTAAGCAGGGCTGTGCCTGGTCAGTACCTGAATGGGAGACCACATGGTAAAGCTAGGTTCTTGCTGGAA
54		1	12202313	12202428	minus	TGCCGGCAGCTAGCGCTCTGCAACTTTCACGTGGTCGCCCACTGAAGTTAAGCAGGGCTGCGCCCGGTCAGTACCTGGATGGGAGACCACATAGGAAAGCTAGGTTGCTACCGGAA
55		1	12359097	12359222	plus	TATTATATGCCGGCAGCTAGCTCTCTGCAACTCTCACATGGTCGCCCACTGAAGCTAAGCAGGGCTGCGCCTGGTCAGTACCTGGATGGGAGACCACATGGGAAAGCTGGGTTGTTGCCGGAAGTG
56		1	13096416	13096534	minus	CAGCCACAGCCATATCACCCTGCAGCCCAAGACTGGTTACTCACTTAAGCTAAGCAGAGCTGAGCCTGGTCAGTACGTAGTTGGGAGACCACATGTGAAAACTAGGGTACTGTTGGAAG
57		1	13107608	13107713	plus	GCTACAGTCATATCACCCTGCAGCCCAAGACCGGTTACTGAAGCTGAGCAGCGCTGATCAGTACCTGGATGGGAGACCACATGAGAAAACTAGGTTGCTGTTGGAA
58		1	13189292	13189408	minus	TGCCACAGACATATCACCCTGCAGCCCAAGACTGGTTACTCTCTGAAGCTAAGCGGGGCTGAGCCTGGTCAGTAACGGGATGGGAGACCACAAGGGAAAGCTAGGTTACTGTTGGAA
59		1	13511822	13511936	plus	AATGGCAGCTAGATCTCTGCAGCTCTCATATGATTTCATACTGAAGCTAAGCAGGGCTGTGCCCGGTCAGTACCTGGATGGGAGACCACATGGGAAAGAAAGATTGCTGCAGGAA
60		1	13675297	13675411	plus	TTATTTACTAGCTCTCTGCAACTCTCACATGGTCACCCACTGAAGCAAAGCAGGGCTGCACCCGGTCAGTACCTGGATGGGAGACCACATGGGAAAGCTAGGTTGCTGGCTGCCG
61		1	14534628	14534739	minus	TTAATGGTTTCTGCAGCTAGCTCTCTGCAACTCTCACATGGTCGCCCACTGAAGCTAAGCAGGGCTGCGCCTGGTCATTCCTTGGATTGGAGACCACATAAGAAAGCTAGGA
62		1	14718008	14718118	minus	GCCGGCAGCTAGTTCTCTGCAACTCTCACATGGTCGCCTACTGAAGCTAAGCAGGGCTGTGCCTGGTGAGTACCTGGATGGGAGACCACATGGAAAAGCAATGTTGCTGCC
63		1	15469173	15469284	plus	AGCCATATCGCCCTGCGGCCCAAGACCGGTTACTCACTGAACCTAAGCAGGGCTGAGCCTGGTTAGTACCTGAATGAGAGAGCAGATGGGAAAACTAGGTTGCTGTTGGAAG
64		1	15693044	15693150	minus	TGCCACAGCCATATCACCCTGCAGACCGGTTACTCACTGAAGCTAAGCATTGCTGAGACTGGTCAGTGCCTGGATGAGAGACCACATGGGAAAACTAGGTAGCTGTT
65		1	16488268	16488393	plus	TAAGCCACAGCCATATCACCCTGCAGCCCAAGACCAATTACTCACTGAAGCTAAGCAGGGCTGAGCCTGGTTAGTACCTGGATGGGAGACCACATGGGAAAACTAGGTTGCTGTTGGAATTGGTGT
66		1	16765424	16765527	minus	CGGCGGCTAGCTCTCTGCAACTCTCACATGGTTGCCCACAGAAGCTAAGCAGGGCTTAGTACCTGAATGGGAGACCACATGGGAAAGCTAAGTTGCTGCCAGAA
67		1	16828054	16828169	plus	ATCCACAGCCATATCACCCTGCAGCCCAAGACCGGTTACTCACTGAAGCTAAGCAGGGCTGAGCCTGGTCAGTACCTGAATGGGAGACCACATGGGAATGTTAGGTTGCTTGGATG
68		1	16967361	16967480	plus	TTTTGCCGACAGCTAGCTCTCTGCAACTCTCACATGGTTACCCACTGAAGCTAAGCAGGGCTGCACCCGGTCAGTACCTGGATGAGAGACCACATTGGAAAGCTAGGTTGCTGCCGGAAG
69		1	17144856	17144979	minus	TGCCACAGCAATGTCACCCTGCAGCCCAAGACCGGTTACTCACTGAAGCTAAGAAGGGCTGAGCCTGGTCAGTACCTGGATGGGAGACCACTAGGGAACACTAGGTTGCTGTTGGAAGTGGTGT
70		1	17229099	17229225	plus	TGTTATTACAGCCATATCACCATGCAGCCCAAGACCGGTTACTCACTGAAGCTAAGCAGGGCTGAGCCTGGTCAGTACCTGGATGGGAGACCACTAGGGAACACTAGGTTGCTGTTGGAAGTGGTGT
71		1	17885767	17885896	plus	TTCAATAGTCACAGCCATGTCACCCTGCAGCCCAAGACCGGTTACTTACTGAAGCTAAGCAGGGCTGAGCCTGGTCAGTACCTGGATGGGAGACCACTAGGGAACACTAGTTTGCTGTTGGACGTGGTGT
72		1	18157915	18158037	minus	GTCACAGCCATGTCACCCTGCAGCCCAAGACCGGTTACTCACTGAAGCTAAGCAGGGTTGAGCCTGGTCAGTACCTGGATGGGAGACCACTAGGGAACACTAGGTTGCTGTTGGAAGTGGTGT
73		1	18158514	18158639	minus	GTCACAGCCATGTCACCCTGCAGCCCAAGACCGGTTACTCACTGAAGCTAAGCAGGGTTGAGCCTGGTCAGTACTTGGATGGTGGGAGACCACTAGGGAACACTAGGTTGCTGTTGGAAGTGGTGT
74		1	18377585	18377708	plus	TGCCACAGCCATGTCACCCTGCAGCCCAAGACCGGTTACTCACTGAAGCTAAGCAGGGCTGAGCCTGGTCAGTACCTGGATGGGAGACCACTAGGGAACACTAGGTTGCTGTTGGAAGTGGTGT
75		1	19012762	19012895	plus	TTTATTGGTTACTCCCTGCTAGTATGACGGCTAGCTCAACTCTCACATGGTTGCCCACTGAAGTTAAGCAGGGCTGTGCCTGGTCAGAACCTGGATGGGAGACCACATGGGAAAGCTATAGGTTGCTGCTGGAA
76		1	19165835	19165956	minus	AGCCAAAGCCATGTCACCCTGCAGCCCAAGACCGGTTACTCACTGAAGTAACCGGTCAGTACCTGGATTGGACCTGGATGGGAGACCACTAGGGAACACTAGGTTGCTGTTGGAAGTGGTGT
77		1	19962773	19962892	plus	TTTGCTGGCAGCTAGCTCTCTGCAACTCTCACATGGTAGCCCACTGAAGCTAAGCAGGGCTGCGCCCCTGGTCAGTACCTGGATGGTAGACCACATGGGAAAGATAGGTTGCTGCTAAAA
78		1	20216032	20216144	minus	TAGCTGGCAGCTAGCTCTCTGCAACTCTCACATGGTTGTCCGCTAAGCAGGGCTGTGCCTGGTCAGTGCACTAAATAGGAGACCACATGGGAAAGCTAGGTTGATGCCGGAAG
79		1	20274029	20274143	minus	GCCCGCCATATCACCCTGCATTCCAAAACCGGTTACTCACTGAAGCTAAGCAGGGCTGAGCCTGGTCAGTACCTGGATGGGAGACCACATGGGAAAACTAGGTTACTGATAGAAG
80		1	20561416	20561545	plus	TAAAACAGCCATATTACCCAGCAGCCCAAGACCAATTACTCACTGGAGCTAAGCACTGTAAGCAGGGCTGAGCCTTGTCAGTAACTGGATGGGAGACCACATGGGAAAACTAGGTTGAAAGTGGTGTTAG
81		1	20987428	20987543	minus	ATGCCGGCAGGTAGCTCTCTGCAACTCTCACATGGTCGCCCACTGAAGCTAAGCAGGGCTGTGCCTGGTCAGTATCTGTATGGGAGACCACATGGAAAATCTAGGTTTCTGCTAGG
82		1	21048250	21048360	minus	CAACATTGCTCTCTGCAACTCTCACATGGTCGCCCAGTGAAGCTAAGCAGGGCTGTACCCATTCAGTACCTGAATGGGAGACCACATGGAAAAGCTAGGTTGCTGCCGGAA
83		1	21227399	21227507	plus	TATTTGGCCACAGCCATATCACCCTGCAGCCTCACTGAAGCTAAGCAGGGCTGAGCCTGGTCAGTACCTGGATGGGAGACCACATGGGAAAACTAGGTTGCTGTTGGAA
84		1	21273780	21273888	plus	GCAGCCATATCACCCTGCAGCCCAAGACCGGTTACTCACAGGGCTGAGCCTGGTCAGTACTTGGATGGGAGACCACAAGGGAAAACTCGGTTGCTGTTGGAAGTGGTGT
85		1	22075916	22076037	minus	TATTGCCAGCAACTAGCTCTCTGCAACTCTCACATGGTCGCCCACTGAAGCTAAGCAGGGCTGCGCCTGGTCACTACCTGGATGGGAGACCACATGAGAAAGCTAGGTTGCTGCCGGAAGTG
86		1	22135702	22135812	minus	TGCCATAACCATATCACCCTGCAGCCCAAGACCAGTTACTCAGGGCAAGGGCTGAGTCTGGTCAGTACTTGGATGGGAGACAACATGAGAAAGCTAGGTTGCCGTTGGAAG
87		1	22314410	22314530	minus	GTAACAAGCTGGCAGCTAGCTCTCTGCAACTCTCACATGGTCACCCACTGGAGCTAAGTAGGGCTGCGCCCAGTCAGTACCTGGAAGTGAGACCACATGGGAAAGCTAGGTTGCTGTTGGA
88		1	22358004	22358119	minus	TAAAATGCAGAGAGCTAGCCGGCAGCTAGCTCTCACATGGTCGCCCACTGAAGCTAAGCAGGCCTGCGCCTGGTCAGTACCTGGATGGGAGACCACATGGGAAAGCTCGGTTGCTG
89		1	22517257	22517374	plus	TAGCCGGTAGCTAGCTCTCTGCAACTCTCACATGGTCGCCCACTAAAGCTAAGCAGGGCTGCGCCCACTCAGTACCTGTATGGGAGACTACATGGTAAAGCTAGGTTGCTGCCGGAAG
90		1	22812446	22812566	plus	TCAGCCGGCAGCTAGCTCTCTGCAACTCTCACATGGTCGCCCACTGAAGCTAAGCAGGGCTGCGCCCGGTCAGTACCTGGATGGGAGACCACATGGGAAAGCTAGGTTGCTGCCGGAAGTG
91		1	23060358	23060475	plus	TTGCTGGCAGCTAGCTCTCTGCAACTCTCACATGGTTGTCCACTGAAGCTAAGCAGGGATGTGCCTGGTAAGTACATTGATGGGAGACCGCATGGGAAGGCTAGGTTGCTGCCAGAAG
92		1	23410830	23410953	minus	CAACACAGCCATGTCACCCTGCAGCCCAAGACCGGTTACTCACTGAAGCTAAGCAGGGCTGAGCCTGGTCAGTACCTGGATGGGAGCCCACTAGGGAACACTAGGTTGCTGTTGGAAGTGGTGT
93		1	24134317	24134434	minus	TGTCACAGCCATATCATCCTGCAGCCCAAGACTGGTTACTTACTGAAGCTAAGCAGGGTTGAACCTGGTTAGTACCTGGATGGGAGACCACATGGGAAAACTAGATTTCTGTTGGAAA
94		1	24544494	24544604	plus	TTTACCGGCAGCTAGCTCTGCAACTCTCACATGGTCGCCCACTCAAGCTAAGCAGGGCCTGGTCAGGACCTGGATGGGAGACCACATGGGAAAGCTAGGTTGCTGTCAAAA
95		1	24731310	24731421	plus	AGACAAGCCATATCATCCTGCAGCCCACGACTACTCACTGAAGCTAAGTAGGGCTGAGCTTGGTCAGTACCTGGATGGGAGACCACATAGAAAAGTTTGGTTGCTGTTGGAA
96		1	25074207	25074323	plus	GGCCACAGTCATATCACCCTCCAATCCGAGACTGGTTACTCAATGAAGCTAAGCAGGGCTAAGCCAGATCAGTACCTAGATGGGAGACCACATAGGAAAACTAGGTTGCTGTTAGAA
97		1	25274858	25274974	plus	GTCACAGCCATATCACCCTGCAGCCCAAGACCGATTACTCACTGAAGCAAAGCAGGGCTAAGCCTGGTCAGTACTTGGATGGGAGACCACTAGGAAACACTAGGTTGCTGTTGGAAG
98		1	25656812	25656919	minus	CGTTTTCAAACTAAAACGCATTAGTGTAAACAGGGCCTAAAGCTAAGCAGGGCTGAGCCTGGGCAGTAACTGGATGGGAGACCACATGGGAAAACTAGGTTGCTGTTG
99		1	25672686	25672811	minus	TTGGCCACAGCCATGTCACCCTGCAGCCCAAGACCGGTTACTCACTGAAGCTAAGCAGGGCTGAGCCTGGTCAGTACCTGGATGGGAGACCACTAGGGAACACCAGGTTGCTGTTGGAAGTGGTGT
100		1	26178944	26179078	plus	TGCCACAGCCATGTCACCCAGCAGCCCAAGACCGGTTACTCACTGAAGCTAAGCAGGGCTGAGCCTGGTTAGTACCTGGATGTGAGACCACTAGGGAACACTAGGTTGCTGTTGGAAGTGGTGTTAGTGAGGCCA
101		1	28329194	28329319	plus	ATATCCACAGCCATGTCACCCTGCAGCCCAAGATTGGTTACTCACTGAAGCTAAGCAGGGCTGAGCCTGGTCAGTACCTGGATGGGAGACCACTAGGGAATACTAGGTTGCTGTTGGAAGTGGTGT
102		1	28829566	28829685	minus	CACCACAGCCATATCACCCTGCAGCCCAAGATCGGTTACTCACTAAAGCTAAGCAGGGCTGAGCCTGGTTAGTACCTGGATGGGAGACCACTAGGGAACACTAGGTTGCTGTTGGAAGTG
103		1	29423460	29423575	plus	AGCCACAGCCATATCACCCTGCAGCCCAACACCGTTTTTACTGAAGCTAAGCAGGGTTGAGCCTGGTCAGTACCTGAATGGGAAACCACATGGAAAATTTAGGTTGCTGTTGGAAG
104		1	29440600	29440718	minus	TATAGCCGGCAGTTAGCTCTTTGCAACTCTCACATGGTCCCCCACTGAAGCTAAGCAGGGCTGCGCCCGGTCAGTACCTGGATGGGAGACCACATGGGAAAGCTAAGTTGCTACTGGAA
105		1	30622809	30622917	minus	GCCACAACCATATCACCCTGCAGCCCAAAGCTCACTAAAGCTAAGCAGGGGTGAGCCTGGTCAGTACCTAGATGAGGGGCCACATAGAAAAACCAGATTGCTGTTGGAA
106		1	30930029	30930159	minus	TTAAATGAGCCACACCCATATCACCCTGCAGCCCAAGACCGGTTACTCACTGAAGCTAAGCAGGGCTGAGCCTGGTCAGAACCAGGATGGGAGACCACATGGGAAAACTAGGTTGCTGTTGGAAGTGGTGT
107		1	30977749	30977873	minus	CAGCCTCAGCCATATCACCCTACAGCCCAAGACCGGTTGGTTACATAAGCTAAGCAGGGCTGAGCCTGGTCAGTACCTGGATGGGAGACCACATGGGAAAACTAGGTTGCTGCTGGAAGTGGTGT
108		1	31306374	31306485	minus	TAGCTATGTCCAGCTAGCTCTCTGCAACTCTCACATAGTCACTGAAGCTAAGCAGGGCTGTGCCTGGTCAGTACCTGGATGGGAGACCACATGGGAAAGCTTGCTGCCGGAA
109		1	31402249	31402372	plus	TGCCACAGCCATATCACCCTGCAGCCCAAGACCGGTTACTCACTAAAGCTAAGCAGGGCTGAGCCTGGTTAGTACCTGGATGGGAGACCACTAGGGAACACCAGGTTGCTGTTGGAAGTGGTGT
110		1	31535461	31535569	minus	GCCACAGCCATATCACACTGCAGCCCAAAGCTCACTAAAGCTAAGCAGGGCTGAGCTTGTTCAGTACCTAGATGAGGGACCACATAAAAAAAACTAGGTTGCTGTTGGA
111		1	31781420	31781535	plus	AGCCAAAGCCATATCACTCTGAAGCTCAAGACTAGTTACTCAATGAAGCTAAGCAGGGCTGAGAGTGGTCAGTACCTGGATGGGGGACCACATGGGAAAACTAGGTTGCTGTTGGT
112		1	31891195	31891308	plus	ATACACAGCCATATCACCCTGCAGCCCAAGATTACTCACTGAAGCTAAGCAGGGCTGAGCCTGGTCAGTATCTGGATGGGAGACCACATGGGAAAACTAGGAAGCTGTTGGATG
113		1	31973541	31973659	plus	TGCCACAGCTATATTACCCTGCAGCCCAAGACCGGTTACTCACTGAAGCTAAGCAGGGCTGAGCCTATCAGTACCTGGATGAGAAACCACATGGGAATACGCTACAATTACTGAAGTAA
114		1	32241537	32241669	minus	GTTCTATAGCATTTAGCCGGCAGCTAGCTCTCTGCAACTCTCACATGGTCGCCCACTGAAGCTAAGCAGGGCTGCGCCTGGTCAGTACCTGGATGGGAGACCACTTGGGAAAGCTAGGTTGCTGCCGGAAGTG
115		1	32268992	32269112	minus	AGCTAGCTAGTACAGCTAGCTCTCTGCAACTCTCACATGATCATCCACTGAGGCTAAGCAGGGCTGCGCCCGGTCAGTACCTGGATGGGAGACCACATGGGAAAGCTAGGTTGCTGCCCGA
116		1	32668101	32668225	plus	ACACCACAGCCATGTCACCCTGCAGCCCAAGACCGGTTACTCACTGAAGCTAAGCAGGGCTGAGCCTGGTCAGTACCTGGATGGGAGAACACTAGGGAACACTAGGTTGCTGTTGGAAGTGGTGT
117		1	32682084	32682196	plus	AAGTTAGCTCTCTGCATCTCTCACATAGTCGCCCACTGAACCTTAGCAGGGCTGCGCCCAGTCAGTCCCTGGATGGGAGACCACATGGGAAAGCTAGGTTGCTGCAGAAAGTG
118		1	32847643	32847761	minus	AGCCGGCAGCTAGCTCTCTGCAACTCTCACATGTTCGCCCACTGAAGCTAAGCAGGGCTGCACCCTGTCAGTACCTGGATTGGAGACCACATGGGAAAGCTAGGTTGCTGCCGGAAGTG
119		1	33002453	33002573	plus	GACAGCCATATCTCCCTGCAGCCCAGGACAGGTTACTCACTGAAGCTAAGCAGGGCTGAGTCTGGTCAGTACCTTGAAGGGAGACCACATGGGAAAACTAGGTTGCTATTGAAGGTGGTGT
120		1	33234589	33234705	plus	AGCCACAGCCATGTCACCTTGCAGACCAAGACTGGTTACTTACTGAAGCTAATCAGGGCTGAGTCTGGTCAGTACCTTGATGTGATACCACATGGGAAAACTAGGTTGCTGTTGGAA
121		1	33329292	33329408	plus	AGCCACAGCCATATCACCCTGAAGCCCAAGAGCGGTTACTTACTGAAGCTAAGCAGGGTTAAGTCTGGTCAGTACCTGGATGGGAGACCACATTGGAAAACTAGCTTGCTGTTGGAA
122		1	33377337	33377455	minus	GGCCACAGCCATATCACCATGCAGCCCAAGACCGGTTACTCACTGACGCTAAGCAGGGCTAAGCCTGGTCAGTACCTGGATGGGAGACCACATAAGAAAGCTAGGTTGCTGTTGAAAGT
123		1	33556019	33556143	minus	CAGCTACAGCCATATCACCCTGCAGCCCAAGACCGGTTATACACTGACGCTAAGAAGGGCTGAGCCTGGTCAGTACCTGGATGGGAGACCACTAGGGGACACTAGGTTGCTGTTGGAAGTGGTGT
124		1	33935667	33935786	minus	TTAGCTGGCAGCTAGCTCTCTGCAACTCTCACATGGTTGCCCACTGAATGCTAAGCAGGGCTGTGCTTGGTCAGTACCTGGATGGGAGACCACAAGGGAAAGCTAGGTTGCTGCCGGAAG
125		1	33986295	33986416	minus	TCTAGCCGGCAGCTAGCTCTCTGCAACTCTCACATGGTCGCCCACTGAAGCTAAGCAGGGCTGCGCCCAGTCAGTACCTGGATGGGAGACCACATGGGAAAGCTAGGTTGCTGCCGGAAGTG
126		1	35271791	35271900	minus	GCAGCTAGGTCTCTGCAACTCTCACATGGTCACCCATAAAGCTAAGCAGGGCTGTGCCTGGTCAGTACCAGAATGGGGGACCACATGGGAAAGCTAGGTTGCTGTCTGAA
127		1	35422234	35422350	plus	TGCAACAGCCTTATCACCCTAGAGCCAAAGACTGGTTACTCGCTGAAGGTAAGCAGGGCTGAGCCTAGTTAGTACCTGGATGGGAGACCACATGGGAAAACTAGGTTGCTGTTGAAA
128		1	35530973	35531086	minus	TGCCGGCAGCTAGCTCACTGCAACTCTCACATGGTCGCCCACTGAAGCTAAGCAGGGCTGTGCCAAGTCAATAACAGAATTGGAGACCACATGGAGAAGATAGGTTGCTTCCAG
129		1	36393801	36393916	minus	ATATTTAGCCAGCAGCTAGCTTCCTGCAACTCTCACATGGTCGCCCACTGAAGCTAAGCAGGGTTGCATCTGGTCAGTACCTGGATGGGAGACCACATGGGAAAGTTGCTGCCGGA
130		1	36404257	36404387	plus	CATTTTTAACACTGGAAGCACCAGAATTGTATAACTCTCTGAAACTCTCACATGGTCACACACTGAAGCTTAGCAGGGCTGTGCCTAGTCAGTACCTGCATGGGAGACCACATCGGAAAGCTAGGTTGTTG
131		1	36666211	36666329	minus	GCAAGCAGCTAGCTCTCACCAACTCTCACATGGTCGCCCAGCCCACTAAAGTGAAGCAGGACAGCGCCAGACAGTAGCTGGATGGGAGACCACATGGGAAAGCCAGGTTGCTGCCGGAG
132		1	37277281	37277405	plus	TTTCACAGCCATATCACCCTGCAGCCCAAAGATCAGTTACTCACTGAAGCTAAGCAGGGCTGAGCCTGGTCAATATCTGGATAGGAAACCACATGGGAAAACTAGGTTGCTACTGGAAGTGGTGT
133		1	37772969	37773081	minus	CCGGCACCTAGCTCTCTGCAACTTTCACATGGTCGCCCACTGAAGCTAGGCAGGGCTGTGCCCGGTCAGTATCTTAATGGAGACCAAATGGAAAAGCTAGGTTGCTGCCGGAA
134		1	37872481	37872582	plus	ATCACCCTACAGCCCAAGACTAGTTACTCACTGAAGCTAAGCAGGGCAGAGCCTGGTTAGTTCTTGGATGGGAGACCACATGGGAAAATTAGGAAGTTAGTT
135		1	38004426	38004546	minus	CATCCACAGCCATGTCACCCTGCAGCCCAAGACCGGTTACTCACTGAAGCTAAGCAGGGCAGAGCCTGGTCAGTACCTGGATGGGAGACCGCTAGGGAACACCAGGTTGCTGTTGGAAGTG
136		1	38321135	38321258	minus	AAACACAGCCATGTCACCCTGCAGCCCAAGACCGGTTACTCACTGAAGCTAAGCAGGGCTGAGCCTGGTCAGTACCTGGATGGGAGACCACATGGGAAAACTAGGTTGCTGTTGGAAGTGGTGT
137		1	38421186	38421306	minus	TGCCACAGACATATCACCCCACAGCCAAAGACTGGTTACTTACGGAAACTAAGCTGGGCTGAGCCTGGTCAGTACCTGGATGGGAGACCACATGCTGTTGGAAGTGTTGTTAGTGAGGCCA
138		1	38696400	38696507	minus	AGCCATGTCACCCTGCAGTTCAAGACCGGTTACTCACTGAAGCTAAGGGCTGTGCCTGGTCAGTGCCTGGATGGGAGACCACTAGGGAACACTAAGTTGCTGTTGGAA
139		1	38795668	38795784	plus	GGCCACAGCCATATCACCCTGCAGCTCAAGACCAGTTACTCACTAAAGCCAAGCAGGGCGGAGCCTGGTTAGTACTTGGATAGGAGACCACATGAAAAATCTAGGTTGCTGTTGGAA
140		1	38891760	38891877	plus	AGCAATAAGTCATATCACCCTGCTGCACAAGAGTGGTTACACACTGAAGCCAAGCAAGGCTGAACCTGATCAGTACCTGAATGGGAGACCACATGGGAAAACTAGGTTGCTGTTGGAA
141		1	39119583	39119710	plus	GCTGGCAGCTAGCTCTCCGTGACTAGCTCTCTGCAACTCTCACATGGTCGCCCACTGAAGCCAAGCAGGGCTGCGCCCGGTCAGTCCCGGATGGGAGACCACAATGGAAAGCTACGTTGCTGCCGGAA
142		1	39293252	39293371	plus	AAAAGCCAGCAGCGAGCTCTCTGTAACTCTCACATGGTCAACCACTGAAGCAGAGCAGTGCTACGCCCGGTCAGTACCTGGATGGGAGACCACATGGGAAAGTTAGGTTGCTGCCGGAAA
143		1	39379935	39380045	plus	CAGCTAGCTCTCTGCAACTCTCACTTGGTAAAACACTCTCACACCCTTAAGCACAGCAGAGCTGCATCCGGTCAGTACCTGCATGGGAGACCACATAGGAAAGCTAGATTG
144		1	39685410	39685533	minus	ACTACTATTGCCGGCAGCTAGCTCTCTGCAACTCTACCATGGTCGCCCACTGAAGCTAAGCAGGGCTGCGCCCGGTCAGTACCTGGATGGGAGACCACATGGGAAAACTAGGTTGCTGCCGGAA
145		1	39981507	39981642	plus	CCGGCAGCTAGCTTTCTAGCTGGCAGCTTGCTCTCTGCAACTCTCACATGGTTGCCCATTGAAGCTAAGCAGGGCTGCGCCCGGTCAGTACCTAGATGGGAGACCACATGGGAAAGCTAGGTTGCTGCCGGAAGTG
146		1	40422507	40422609	plus	CTAGCTCTCTGCAACTCTCTCTGCACTGGGCTTACTGAAGCTAAGCATTGCTGCGCCCGGGCAGTACCTGGATAGGAGACCACATGGGAAAGCAAGGTTGCTG
147		1	40478132	40478251	minus	ATTATTGCCGGCAGCCGGCTCTCTGCAACTCTCAAATGTTCTTCCTCTGAAGCTAAGCAGGGCTGCGTGGTCAGTACCTGGATGGGAGACCACATGGGAAAGCTAGGTTGCTGCTGGAAA
148		1	40496095	40496218	plus	CTACACAGCCATATCACCCTGCACCCCAAGACCGGTTAATCACTGAAGCTAAGCAGGCCTGAGCCTGGTCAGTACCTGGATGGGAGACCACTAGGGAACACTTGGTTGCTGTTGGAAGTGGTGT
149		1	40566986	40567101	plus	GCCGGCAGCGAGCTCTCTGCAACTCTCACATGGTCCCCCACTGAAGCTAAGCAGGGCTGCACCCGGTCAATACCTGGATGAGAGACCACAAGGGAAAGCTTGGTTGCTGGCGGAAG
150		1	40608987	40609105	minus	TTCCACTGTCATATCACTCTGCAACCCAAGACCAGTTACTCACTGAAGCTAAGCGAGCTGAGCCTGGTCTGTATCTGGATGGGAGACCACATGGGAAAACTAGGTTGCTGTTGGAAGTG
151		1	40899864	40899988	minus	TTGGGTTGGCCATATCACCCTGCAGCCCAAGACCAGTTACTCATTGAAGCTAAGCTGGGCTGAGCCTGGTCAGTACCTGGATGGGACACCACATGGGAAAATTAGGTTGCTGCTGGAAGTGGTGT
152		1	41393461	41393583	plus	CATCCAGCCATATCACCCTGCAGCCCAAGACCGGTTACTCCCTGAAGCTAAGCAGGACTGAGCCTGGTCAGTATCTGGATGGGAGACCACATGGGAAAACTAGGTTGCTGTTGAAAGTGGTGT
153		1	41576359	41576486	minus	GTTTTCTCTGGGTGCTCCGGTTTCCCTCACAGTCCAAAGACGTGTGCTAATTACTCGCTGAAGCTAAGCAGGGCTAAGCCTGTTCATTACCTGGATGAGAGACCACATGGGAAACGTTCGAGGTTACA
154		1	41631130	41631238	minus	AGCTAGCTCACTGCAACTCTCACGTGGTCACTCACTGAAGCTAAGCAGGACTGCACCTGGTCAGTACCTAGATGGGACACCACATGGGAAAGCTAGGTTGCTGCCAAAA
155		1	41652011	41652126	minus	AGGCAGCTAGCTCTCTGCAACTCTCACATGGTCGCCCACTGAAGCTAAGCAGGGCTGCGCCCGGTCAGTACCTGGATGGGAGACCACATGGGAAAGCTAGGTTGCTGCCGGAAGTG
156		1	41866497	41866599	plus	CAGCAGCTAGCTCTCTGCAACTCTCATATGGTCGCCCACTGAAGCTGAGCTGTGCCCGTTAAAGTACCTGAATGGGAGACCACATGGGAAAGCTAGGCTGCTG
157		1	41896606	41896716	plus	CTGGCAGCTAGCTCTCTGCAACTCTCACATGGTCGCTGAAGCTAAGCAGGGCTGCGCCCGGTCAGTACCTGGATGGGAGACCACTTGGGAAAGCTAGGTTGCTGCCGGAAG
158		1	42273596	42273701	minus	ATATCACATTGTAGCCCAAGACCAGTTATTAACTGAAGCTAAGCAGGGGTGAGCCTGGTCAGTACCTGGATGGGAGACCACATGGAAAAACCTGTGGTCTGTGTAA
159		1	42540801	42540915	minus	TTACAACAGCCATATCACCCTGTAGCCAAAGACCAGTTACTCACTGAAACTAAGCAGGGCTGAGCCTGGTTTGTACCATGGGAGACCACATGGGGAAACTAGGTTGCTGTTGGAA
160		1	42563959	42564077	plus	TCTGGCAGCTGTGGAACGATGCATTACTCTCACATGATCGCCCACTGAAGCTAAGCAGGGCTGTGCACGGTCAGTACCTGGATGGGAGACCACATAAGAAAGCTAGGTTGCTGCCAAAA
161		1	42950706	42950812	minus	TGACACTGTTATATCACCCTGCAGCTCAAGACCGGTTACTCACTGAAGCTAAGCAGGGCTAAGTTCAAGATAAGAGACCACATGGGAAAACTAGGTTGCTGTTGGAA
162		1	43087553	43087678	plus	TATATTGTAATAATATAAGCTAGCTCTCTGCAACTCTCACATGGTGGCCCACTAAAGCTAAGCAGGGCAGTGCCCAGTCAGTACCTGGATGGGAGACCACATTGAAAAGCTATGTTGCTGCTGGAA
163		1	43805829	43805950	plus	AAGCCGGCAGCTAGCTGACATGGCTGTAACTCTCACAGGGTCTGTACCCGAAGCTAAGCAGGGCTGCCCCTTGTCAGTACCTGGATGGGAGACCACATGGGAAAGCTAGGTTGCTGCCAGAA
164		1	43888962	43889081	plus	TTGCTGGCAGCTAGTTCTCTGCTACTCTCACACAGTTGCCCACTGAAGCTAAGCAGGGCCGTGCCTGGCCAGTATCTGGATGGGAGACCACATGGGAAAGCTAGGTTGCTGCTGGAAGTG
165		1	44241890	44242008	minus	AGCCGGCAACTAGCTCTCTGAAACTCTCACATGGTTGCCCACTGAGGCTAAGCAGGGCTGCACCTGGTCAGTATCTGGATGGGAGACCACATGGGAAAGCTAGGTTGCTGCCGGAAGTG
166		1	44406287	44406408	plus	AACAAATGCCGGCAGCTAGATCTCTGCAACTCTCACATGGTCGCCCACTGAAGCTAAGCAGGGCTGCGCCCGGTCAGTACCTGGATGGGAGACCACATGGGAAAGCTGGGTTGCTGCCGGAA
167		1	44614562	44614672	minus	TGCTACAGCCATTTCACTCTGCAGCCCGAGACCGGTTACTCGCTAAAGCAGGGCTGAGCCTGGTCAGTACCTGGATGGGAGACCGCATGGGAAAACTAGGTTGCTGTTGGA
168		1	44693287	44693407	minus	CATTTGCCTGCAGCTAGCTCTCTGCAACTCTCACATGGTCGCCCACTAAAGCTAAGCAGGGCTGCGCCCGGTCAGTACCTGGATGGGACACCACATGGGAAAGCTAGGTTGCTGCCGGAAG
169		1	45076617	45076738	plus	TTTAGCCGGCAGCTAGCTCTCTGCAACTCTCACATGGTCGCTTACTGAAGATAAGCAGGGCTGCGCCCGGTCAGTACTTGGATGGGAGACCACATGGGAAAGCTAGGTTGCTCCAGGAAGTG
170		1	45369013	45369141	minus	CTTATGGCCACAGCCATATCACCCTGCAGCCCAATACCGGTTACTCACTGAAGCTAAGCAGGGCTGAGCCTGGTTAGTACCTGGATGGGAGACCACTAGGGAACACTAGGTTGCTGTTGGAAGTGGTGT
171		1	46253794	46253911	minus	TGCCACAGCCATATCACCCTGCAGCCCAAGACCAGTTACTTGCGTAAGCTGAGCAGGGCTGAGCCTGGCCAGTACATAAATGGGAGACCACATGGGGAAACTAGGTTGCTGTTGGAAG
172		1	46752685	46752800	minus	TTTAGCTGGCAGCTAACTCTCTGCAACTCTCACATGGTTGCCCATTGAAGCTAAGCAAGGCTTTGCCCAGTCAGTACCTGGATGGGAGACATGGGAAAGCTAGGTTGCTGCCGGAA
173		1	46975416	46975535	minus	ATGCCGGCAGCTAGCTCTCTGCAACTTTTACATGGTCGCCCACTAAAGCTTAGCAGGGCTGCACCAGCTCAGTACCTGTATGGGAGACCACATGGGAAAGCTAGGTTGCTGCTGGAAGTG
174		1	47014893	47015013	minus	CATATACAGCCATATCGTCCTACAGCCCAAGACTGGTTACTCACTGAAGCTAAGCAGGGCTGAGCCTGGCTAGTAACTCGATGGGAGACCACATGGGAAAAACAAGGTTGCTGTTGGAAGT
175		1	47222866	47222978	plus	AACAGCTAGCTCTCTGCAACTCTCACATGTTTGCCCACTGAAGCTAAGCAGGGCTGTGCTTGGTCAGCACCTGTATGGGAGACCACATAAGAAAGCTAGGTTGCTGCCGGAAG
176		1	47237346	47237447	minus	AGCTAGCTCTCTGCAACTCTGGTCATCTATTGAAGCTAAGAAGGGCTGCTTCCGCTCAGTACCTGGATGGAAAACCACATGGGAAAGCTAGGTTGCTGTCGG
177		1	47779036	47779144	plus	TCCACAGCCATATCACCCTGTAGCCCAAGACTGGTTACTCACTGAAGCTAAGCAGGCCTGAGCCTGGTCAGTAGCTGAATGGGATCCCACATAGGAAAACAAAGTTGCT
178		1	47900988	47901091	minus	CTGGCAGCTAGCGCTCTGCAACTCTCACATGGTTGCCCACTGAAGCTAAGCATGGTCAGTACCTGGATGGGAGACCACATGGCAAAGCTACGTCGCTGCCTGAA
179		1	48179554	48179676	plus	AGGTAGCCGGCAGCTAGCTCTCTGCAACTCTCACATGGTCGCCCACTGAAGCTAAGCAGGGCTGCGCCCGGTCAGTACCTGGATGGGAGACCACATGGGAAAGCTAGGTTGCTGCCGGAAGTG
180		1	48604835	48604943	plus	GCCAGCAGCTAGCTCTCTGCAACTCTTACGTGGTCGCAGACTGAAGCTAAGCAAGGCTGCTCCCGGTCAGTACCTGGATGGGAGACCTCATTGGAAAGCTGGTTTGCTG
181		1	48946281	48946404	plus	GCAGAAGTATAAATCCGCCTTCACACTGCGGCCTAAGACTATTTACTCATTGAAGCTAAGCAGGCCTGAGCCTGATCAATACCTGAATGGGAGACCACATGGGAAAACTAGGTTGCTGTTGGAA
182		1	48978794	48978914	plus	TTTACCGGCAGCTAGCTCTCTGCAACTCTCACATGGTCGCCCACTGAAGCTAAGCAGGGCTGCGCTTGGTCAGTACCTGGATGGGAGACCACATGGGAAAGCTAGGTTACTGCCGGAAGTG
183		1	49127653	49127760	minus	TGCCACAGCCATATCACCCTGCAGCCCAAGACCGGTTACTCACTGAAGCTAAGCCTGGTCAGTACCTGAATGGGAGACGACATGGGAAAATTAGGCAGCTGTTGGAAG
184		1	49160469	49160590	plus	AATCGCCGGCAGCTATCTCTCTGCAAATCTCACATGGTCACCCACTGAAGCTAAGCAAGGCTGCGCCCAGTCAGTACCTGGATGGGAGACCACATGGGAAAGCTAGGTTGCTGCCGGAAGTG
185		1	49560923	49561046	minus	TGTCACAGCCATGTCACCCTGCAGCCCAAGACCGGTTACTCACTGAAGCTAAGCAGGGCTGAGCCTGGTCAGTACCTGGATGGGAGACCGCTAGGGAACACTAGGTTGCGGTTGGAAGAGGTGT
186		1	49845708	49845817	plus	GCTGGCAGCTAGCTCTCTGCCACTCTCATATAGTCACCCACTGAAGCTAAGCAGGGCTGCGCCTGGTCATTACCTGGATGGGAGACCGGGCAAGCTAGATTGCTGCCAGA
187		1	49990610	49990734	plus	AGCTATAGCCGGCAGCTAGCTCTCTGCAACTCTCACATGGTCGCCCACTGAAGCTAAGCAGGGCTGCGCCCGGTCAGTACCTGGATGGGAGACCACATGGGAAAGCTAGGTTGCTGCCGGAAGTG
188		1	50210565	50210682	plus	ACTGGCAGCTAGCTCTCTGCAACTGTCACATGGTCGCCCACTAAAGCTAAGCAGGGCTGAGCTTGGTCTGTACCTGGATGGGAGACCACATGGGAAAGCTAGGTTGCTGCTGGAAGTG
189		1	50233072	50233198	minus	GTCAACTATGCCGGCAGCTAGCTCTCTGCAACTCTCACATGGTCGCCCACTGAAGCTAAGCAGGGCTGCGCCTGGTCAGTACCTGGATGGGAGACCACATGGGAAAGCTAGGTTGCTGCCGGAAGTG
190		1	50670923	50671041	minus	TGCCACAGCCACCCTGCAGCCCAAGACCGGTTACTCACTGAAGCTAAGCAGGGCTGAGCCTGGTCAGTACCTGGATGGGAGACCACTAGGGAACACTAGGTGGCTGTTGGAAGTGGTGT
191		1	50671880	50672003	minus	TGCCACAGCCATATTACCATGCAGCCCAAGACCAGTTACTCACTGAAGCTAAGCAGGGCTGAGCCTGGTCAGTACCTGGATGGGAGACTACTAAGGAACACTAGGTGGCTGTTGGAAGTGGTGT
192		1	50821667	50821783	plus	TTGCTTGCAGCTAGCTCTCTGCAGCTCTCACATAGTCGCCCACTGAGGCTAAGCAGGGCTGTACCCTGTCAGTACCTGGATAGGAGACCACATGGGAAAGCTAGGTTGCTGCCAAAA
193		1	50906731	50906849	plus	CTCTAGTCATGTCACCCTGCAGCCCAAGACTGGTTACTCACTGAAGCTAAGCAGGGCTGAGCCTGGTCAGTACCTGGATGGGAGACCAAATGGGTTAAACTAGGTTGCTGTTGGAAGTG
194		1	51129586	51129703	plus	TAGCAGGCAACTAGCTCTCTGCAACTCTCACATGGTCGCCCACTAAAGCTAAGCAGGGCTGCGCCCGGTCAGTACCTGGATGGGAGACCACATGGGAAAGCTAGGTTGCTGGCGGAAG
195		1	51430483	51430612	plus	TTAGTATATTTTGCCGGCAGTTAGCTCTCTGGAACTCTCACATGGTCGCCCACTGAAGCTAAGCAGGGCTGTGCCCGGTCAGTACCTGGATGGGAGACCACATGGGAAAGCTAGGTTGCTGCCGGAAGTG
196		1	52236313	52236436	plus	AAACACAGACATCTCACCCTGCAGCTCAAGACCGCTTACTCACTGAAGCTACGCAGGGCTGAGCCTGGTCAGTACCTGGATGGGAGACCACATGGGAAAACTAGGTTGCTGTTGGAAGTGGTGT
197		1	52485187	52485296	plus	ATCATAGCTGGCAGCAACTCTCACATGGTCGCCCACTGAAGCTAAGCAGGGCTGAGCCCGGTCAGTACCTGGATGGGAGACCACATGGGAAAGCTAGGTTTCTGCCGGAA
198		1	52622151	52622272	minus	ACTCACACCATATCACCCTGCAGCCCAAGACCGGTTACTCACTGAAGCCAAGCAGGGCTGAGCCTGGTTAGTACCTGGATGGGAGACCACTAGGGAACACTAGGTTGCTGTGGAAGTGGTGT
199		1	52753029	52753143	plus	CCACAGCCATCTTACTCTGCAGCCCAAGACTGGTTACTCACTCAAGCTAAGCAGGCCTGAACCTGGCCAGTACATGGATGGGAGACCACATGGGAAAACTAGGTTGCTGTTGGCA
200		1	53131258	53131381	minus	GGCCACATCCATATCACCCTGCAGCCCAAGACCGGGTACTCAATCAAGCTAAGCAGGGCTGAGCCTGGTCAGTACCTGGATGGGAGACCAAATAGGAACACTAGGTTGCTGTTGGAAGTGGTGT
201		1	53470575	53470692	minus	CATAATAGCCATATCACCCTGCAGCCCAATACTGGTTACTCACTGAAGCTAAGCAGGGCTAAGCCTAGTCAGTGCCTGGATGGGAGACCACATGGGAAAAAATAGGTTCCTGTTGGCA
202		1	54427641	54427764	minus	AGCCACAGCCATGTCACCCTGCAGCCCAAGACCGGTTACTCACTAAAGCTAAGCAGGGCTGAGCCTGGTCAGTACCTGGATGGGAGACCACATGGGAACACTAGGTAGCTGTTGGAAGTGGTGT
203		1	54450814	54450931	plus	GCCGGCAGCTAGCTCTCTGCAACTCTCATATGGTTACGCACTGAAGCTAATCAAGGATGCGCCCGGTCAGTACCTGCATAGGAGACCACATGGGAAAGCTTGGTTGCTGCCGGAAGTG
204		1	54936179	54936301	minus	TTCGCAGCCATATCAACCTGCAGCCCAAGGCCAGTTACTCACTAAAGCTAAGCAGGGCTGAGCCTGGTCAGTACCTGGATGGGAGACCACTAGGGAACACTAGGTTGCTGTTGGAAGTGGTGT
205		1	55137929	55138047	plus	TAAATCGGCAGCTAGCTCTCTGCAACTCTCACATGGTCGCCCACTGAAACTAAGCAGGGCTGCGCCTGATCAGTACCTGGATGGGAGACCACATGGCAAAGCTAGGTTGCTGCCAGAAG
206		1	55388818	55388939	plus	AATGGTCGCAATTTCGAGCCCTGCATATCATGGAGAGCGGTTACTCACTGAAGCAAAGCAGGGCTGAGCCTGGTCAGTGTCTGGATGGGAGACCACATGGGAAAGCTAGGTTGCTGTTGGAA
207		1	55524134	55524257	minus	ATACACTAATTGCCGGCAGCTAGCTCTCTGCAACTCTCTTGGTCGCCCTCTGAAGCAAAGCAGGGCTGATCCTGGCCAGTACCTGGATGGGAGACCACATGGGACAGCTGGGTTGCTGCCGGAA
208		1	55577643	55577761	minus	TAGTCGGCAGCTCGCTCTCTGCAACTCTCACATGGTCGCCCACTGAAGCTAAGCAGGGCTGTGCCTGGAATAGGATTGGAGGGAATTAGAGACCACATGGAAAGCTAGGTTGCTGCTGG
209		1	55586797	55586919	minus	ATCACAGCCATATCACCCTGCAGCCCAAGACCGGTTACTCACTGAAGCTAAGCAGGGCTGAGCCTGGTCAGTACCTGGATGGGAGACCACTAGGGAACACTAGGTTGCTGTTGGAAGTGGTGT
210		1	55849036	55849152	minus	TGCCACAGCCATATCACCCTTCAGCCCTAGACCGGTTACTCACTGAAGCTATGCAGGGCTGAGCCTGGTCAGAACCCGGATGGGAGACCAAATGGGAAAACTAGGTTGCTGTTGGAA
211		1	55865004	55865129	minus	ACAGCCACAGCCATATCACCCTGCAGCCCAAGACCGGTTACTCACTGAAGCTAAGCAGGGCTGAGCCTGGTCAGTACCTGGATGGGAGACCACTAGGGAACACTAGGTTGCTGTTGGAAGTGGTGT
212		1	55913128	55913251	plus	TGTCACAGCCATATCACCCTGCAGCCCAAGACCGGTTACTCACTGAAGCTAAGCAGGGCTGAGCCTGGTTAGTACCTGGATGGGAGACCACTAGGGAACACTAGGTTGCTGTTGGAAGTGGTGT
213		1	55919176	55919298	minus	TCTATTGGCCGGCAGCTAGCTCTCTGCAACTCTCACATGGTCGCCCACTGAAGCTAAGCAGGGCTGCGCCCGGTCAGTACCTGGATGGGAGACCACTTGGGAAAGCTAGGTTGCTGCCGGAAG
214		1	56203902	56204025	minus	TGCCACAGCCATGTCACCCTGCAGCCCAAGACTGGTTACTCACTGAAGCTAAGCAGGACTGAGCCTGGTCACTACCTGGATGGGAGACCACATGGGAAAACTAGGCTGCTGTTGGAAGTGATGT
215		1	56212249	56212372	minus	CAGGACAGCCATATCACCCTGCAGCCCAAGACCTGTTACTCACTGAAGCTAAGCAGGGCTGAGCCTGGTCAGTACCTGGATGGGAGACCACTAGGGAACACTAGGCTGCTGTTGGAAGTGGTGT
216		1	56214042	56214165	minus	TGCCACAGCCATGTCACCCTGCAGCCCAAGACTGGTTACTCACTGAAGCTAAGCAGGGCTGAGTCTGGTCAGTACCTGGATGAGAGACCACATGGGAAAACTAGATTGCTGTTGGAAGTGGTGT
217		1	56221459	56221574	minus	TGCAGGCAACTAGCTCTCTGCATATCTCACATGGTCGCCCACTGAAGCTAAGCAGGGCTGCGCCCAGTCAGTACCTGGATGGGAGACCACATAAGAAAGCTAGGTTGCTGCCGGAA
218		1	56432131	56432248	minus	TGCCACAGCCATATCACTCCACAGCCCAAGACTGGTTACTCGCTGAAGCTAAGCAGGGCTGAGCCTGGTCACTACCTGGATGGGAGACCACATGGGAAAACAAGGTTGCTGTTGAGAG
219		1	56447940	56448050	minus	GCAGCTAGCTTTCTGCAACTCTCACATGGTCGCTCACTGAAGCTAAGCAGGGCTGTGTCCGGTCACTACCTGGATGGGAGACCACACAAGAAAGCTAGGTTGCTGCCAGAA
220		1	56750314	56750427	minus	TAGCCGGCAGCTAGCTCTCTGCATATCTCACATGGTCTCCCACTGAAGCTAACAGGGCTGCGCCCGGTCAGTACCTGGATGGGAGACCACATGGGAAAGCTAGGTTGCTGCCGG
221		1	56963459	56963576	minus	TTTGCCGGCAGCTAGCTCTCTGCAACGCTCACATGGTCGCCCACTGAAGCTAAGCACGGCTGCGCCTGGTCAGTACCTGGATGGGAGACCACATGGGAAAGCTAGGTTGCTGCCAGAA
222		1	57490968	57491083	plus	TGGAGGCAGCTAGCTCTTTGCAACTCTCACATGGTTGCCCACTGACGCTAAGCAGGGCTGCGCCCGGTCAGTACCTGGATGGGAGACCACATGGGAAAGCTAGGCTGCTGCTGGAA
223		1	57540766	57540891	minus	AGCTAGCAGCCGGCAGCTAGCTCTCTGCAACTCTCACATGGTCGCCCACTGAGGCTAAGCAGGGCTGCGCCCGGTCAGTACCTGGATGGGAGACCACATGGGAAAGCTAGGTTGCTGCCGGAAGTG
224		1	57622569	57622684	plus	TGGAGGCAGCTAGCTCTTTGCAACTCTCACATGGTCGCCCACTGAAGCTAAGCAGGGCTGCGCCCGGTCAGTACCTGGATGGGAGACCACATGGGAAAGCTAGGCTGCTGCTGGAA
225		1	57791950	57792074	minus	TTTTGCTGTGAACATTGTGTTCACAGGCTCATTACGTGAGGTGAGGCCCACTGAAGCTAAGCAGGGCTGCGCCCGGTCAGTACCTGGATGGGAGACCACATGGAAAAGCTAGGTTGCTGCCAGAA
226		1	58305080	58305199	plus	TGAGCCAGATCACCCTGCAGCCCAAGACCGGTTACTCACTGAAGCTAAGCAGGGCTGAGCCTGGTCAGTACCTGGATGGGAGACTACTAGGGAACACTAGGTTGCTGTTGGAAGTGGTGT
227		1	58354142	58354258	plus	ATTCCGGCAGATAACTCTCTGCAGCTCTCACATGGTTGCCCACTGAAGCTAAGCAGGGCTGCGCCCGGTCAGTACCTGAATGGGAGACCACATGGGAAAGCTAGGTTGCTGCCCGCA
228		1	58643977	58644096	minus	CCATAGCCGGCAGCTCGCTCTCTGCAACTCTCACATGGTCGCCCACTGAAGCTAAGCAGGGCTGCACCCGTTCACTACCTGGATGGGAGACCACATGGGAAAGCTAGTTTGCTGCCGGAA
229		1	58677976	58678101	minus	ACAGCCACAACCAGATCACCCTGCAGCCCAAGACCGGTTACTCACTGAAGCTAAGCAGGGCTGAGCCTGGTCAGTACCTGGATGGGAGACCAAACAGGAAAGCTAGGTTGCTGTTGGAAGTGGTGT
230		1	58681646	58681771	minus	ACAGCCACAGCCAGATCACCCTGCAGCCCAAGACCGGTTACTCACTGAAGCTAAGCAGGGCTGAGCCTGGTCAGTACCTGGATGGGAGACCAAACAGGAAAGCTAGGTTGCTGTTGGAAGTGGTGT
231		1	58688369	58688486	plus	TAGCCGGCAGCTTGCTCTCTGCAACTCTCACATGATCGCCCACTGAAGCTAAGCAGGGCTGCACCCGGTCAGTAGCTGGATGGGAGACCACATGGGGAAGCTATGTTGCTGTCGGAAG
232		2	570583	570700	minus	AGCCACAGCCATATCACCCTGCAGCCCAAGACCGGTCACTCACTGAAGCTATGCAGGGCTGGGTCTGGTCAGTACCTGGATGGGAGAGCACATGGGAACACTAGGCTGCTGTTGGAAG
233		2	639684	639800	plus	TTTGCCGGCAGCCAGCTCTCTGCCACTCTCACATTGTCGCCCACTGAAGCTAAGCAGGGCCGAGCCCGGTCAGTACCTGGATGGGAGACCACATGGGAAAGCTAGGTTGCTGCCGGA
234		2	931208	931332	minus	CTTTCACAGCCATATCACCCTGCAGCCCAAGACCGGTTACTCACTGAAGCTAAGCAGGGCTGAGCCTGGTCAGTACCTGGATGGGAGAGCACATGGGAACACTAGGCTGCTGTTGGAAGTGGTGT
235		2	1184299	1184417	minus	TTTGCCGGCAGCCAGCTCTCTGCAACTCTCACATGGTCGCCCACTGAAGCTAAGCAGGGCTGCACCCGGTCAGTACCTGGATGGGAGACCACATGGAAAAGCTAGGTGGCTGCCGGAAG
236		2	1216543	1216666	minus	TGCCACAGCCAGATCACCCTGCAGCCCAAGACCGGTTACTCACTGAAGCTAAGCAGGGCTGCGCCTGGTCAGTACCTGGATGGGAGAGCACATGGGAACACTAGGTTGCTGTTGGAAGTGGTGT
237		2	1679539	1679647	plus	ACCAGCTAGCTCTCTTCAACTCTCACATGGTCGCCCACTGAAGCTAAGCAGGGCTGCGCCTGGTCAGTACCTGAATGGGAGACCACATGGGAAAGCTAGGGTGGTGTTA
238		2	1680096	1680208	plus	ACCAGCTAGCTCTCTGCAACTCTCACATGGTCGCCCGCTGAAGCTAAGCAGGGCTGCGGCTGGTCAGTACCTGAATGGGAGACCATATGGGAAAGCTAGGTTGCTGTCGGAAG
239		2	1680668	1680777	plus	CAGCTAGCTTTCTGCAAGTGTCACATGGTCGCCCGCTGAAGCTAAGCAGGGCTGCGGCTGGTCAGTACCTGAATGGGAGACCATATGGGAAAGCTAGGTTGCTGTCGGAA
240		2	2120302	2120425	minus	GGCCACAGCCATATCACCCAGCAGCCCAAGACCGGTTACTCACTGAAGCTAAGCAGGGCTGAGCCAGGTTAGTACCTGGATGGGAGACCACTAGGGAACACCAGGTTGCTGTTGGAAGTGGTGT
241		2	2221577	2221699	minus	TTTTGCCGGCAGCTAGCTCTCTGCAACTCTCACATGGTCGCCCACTGAAGCTAAGCAGGGCTGCGCCTGGTCAGTACCTAAATGGGAGACCACATTGGAAAAGCTAGGTTGCTGCCGGAAGTG
242		2	2462766	2462872	plus	TCAAGCATATTGCAGCCCAAAACCGGTCACTCACTGAAGCTAAGCAGGGCCGAGCCTGGTCAGTACCTGGATGGGAGACCACATGGGAAAGCTAGGCTGCTGTTGGA
243		2	2651027	2651152	plus	ATTGTCACAGCCATATCACCCTGCAGCCCAAGAGCGGTTACTCACTGAAGCTAAGCAGGGCTGAGCCTGGTTAGTACCTGGATGGGAGACCACTAGGGAACACTAGGTTGCTGTTGGAAGTGGTGT
244		2	3091073	3091197	minus	TGGCCACAGCCATGTCACCCTGCAGCCCAAGACCGGTTACTCACTGAAGCTAAGCAGGGCTGAGCCTGGTCAGTTCCTGGATGGGAGACCACTAGGGAACACTCGGTTGCTGTTGGAAGTGGTGT
245		2	4239180	4239304	minus	TCAATCAGCCGGCAGCTAGCTCTCTGCAACTCTCACATGGTCACCCACTGAAGCTAAGCAGGGCTGTGCCTGGTCAGTACCTGGATGGGAGACCACATGGGAAAGCTAGGTTGCTGCTGGAAGTG
246		2	4246889	4247007	plus	TTTGCCGGCAGCTAGCTCTCTGCAACTCTCACATGGTCGCCCCCTGAAGCTAAGCAGGGCTGCGCCCGGTCAGTACCTGGATGGGAGACCACATGGGAAAGCTAGGTTGCTGCCGGAAA
247		2	4347040	4347166	plus	CATTTCTACAGCCATATCACCCTGCAGCCCAAGACCGGTTACTCACTGAAGCTAAGCAGGGCTGAGCCTGGTCAGTACATGGATGGGAGACCACTAGGGAACGCTATGTTGCTGTTGGTAGTGGTGT
248		2	4504578	4504694	minus	CATTGCAGCCATATCACCCTGCAGTCCAAGACTGGTTACTCACTGAAGCTAAGTAGGGCTGAGCCTGGTCAGTAGCTGGATGGGAGACCACATGGGAAAACTAGGTTGCTGTTGGAA
249		2	4797236	4797348	minus	AGCAGCTAGCTCTCTGCAACTCTCACATGGTCGCCCACTGAAGCTAAGCAGGGCTGCGCGCGGTCAGTACTTGGATGCGAGACCACATGGAAAAGCTAGGTTGCTGCCGGAAG
250		2	4906319	4906442	plus	AACCACAGCCATGTCACCCTGCAGCCCAAGACCGGTTACTCACTGAAGCTAAGCAGGGCTGAGCCTGGTCAGTACCTGGATGGGAGACCACTAGGGAACACTAGGTTGCTGTTGGAAGTGGTGT
251		2	4961900	4962026	minus	TAAAACATATGCGGCAGCTAGCTCTCTGCATCTCTCACATGGTCGCCCACTGAAGCTAAGCAGGGCTGCGCCCGGTCAGTACCTGGATGGGAGACCACATGGGAAAGCTAGGTTGCTGCCGGAAGTG
252		2	5491210	5491329	plus	AGTAGCCGGCAGCTAGCTCTCTGCAACTCTCACATGGTCGCCCACTGAAGCTAAGCAGGGCTGTGCCTGGTCAGTACCTGGATGGGAGACCACATGGGAAAGCTAGGCTGCTGCCGGAAG
253		2	5761475	5761595	minus	TTTAGCCGGCAGCTAGCTCTCTGCAACTCCGACATGGTCGCCCACTGAAGCTAAGCAGGGCTGCGCCCGGTCAGTACCTGGATGGGAGACCACATGGGAAAGCTAGGTTGCTGCCGGAAGT
254		2	5784882	5785003	minus	TTACGCCGGCAGCTAGCTCTCTGCAACTCTCACATGGTCGCCCACTGAAGCTAAGCAGGGCTGCGCCCGGTCAGTACCTGGATGGGAGACCACATGGGAAAGCTAGGTTGCTGCCGGAAGTG
255		2	5825459	5825572	minus	AGCCACAGCCATATCACCCTGCAGCCTAAGACCCACTCAATGAAGCTAAGCAGGGATGAACCCGGTCAGTACCTGGATGGGAGACCTCATTGGAAAACTAGGTTGCTTTTGGAA
256		2	6455815	6455935	plus	TATACGCCGGCAGCTACCTCTCTGTAACTCTTTCATGGTCGCCCACTGAAGCTTAGCAGGGTTGCGCCTGGTCAGTACCTGGATGGGAGACCACATGGGAAAGCTAAGTTGTGGCTGGAAG
257		2	6651790	6651906	plus	ACTGCCGGCAGCTAGCTCTCTGCAGCTCTCACATGGTCGCCCACTGAAGCTAAGCAGGGCTGCGCCCGGTCAGTTCCTGGATGGGAGACCACATGAGAAAGCTAGGTTGCTGCAGAA
258		2	7056311	7056430	plus	TCTTTGCCGCCAGCTAGCTCTCTGCAACTCTCACATGGTCGCCCACTGAAGCTAAGCAGGGCTGCGCCCGGTCAGTACCTGAATGGGAGACCACATGGGAAAGCTAGGTTGCTGCTGGAT
259		2	7523184	7523302	plus	GTTGGCCGTCAGCTAGCTCTCTGCAACTATCACATGGTTGCCCACTGCAGCTAAGCAGGGCTGCGCCTGGTCAGTACCTGGATGGGAGATCAAATGAGAAAGCTAGGTTGCTGCCAGAA
260		2	8225705	8225827	plus	TGGAACAGCTACCAGCTAGCTCTCTGCAACTCTCACATGGTCGTCCACGAAAGATAAGCATGGCTGCACCTAGTCGATACCTGGATGAGAGACCAGATGGGAAAGCTAGGTTGCTGCCAGAAG
261		2	8391286	8391395	plus	AGCTAGCTTTTCAACAACCCTCATGTGGTTGCCCACTGAAGCTAAGCAGGGCTTCGCCCAGTCAGTCTCTGGATGGGAGATCACATGGAAAAGCTAGGTTGCTGCCAGAA
262		2	8500041	8500167	minus	ATATTATATTAGCCGGCAGCTAGCTCTCTGCAACTCTCACATGGTCGCCCACTGAAGCTAAGCAGGGCTGCGCCTGGTCAGTACCTGGATGGGAGACCACATGGGAAAGCCAGGTTGCTGGCGGAAG
263		2	8538572	8538695	plus	TAATTTGCCGGCAGCTAGCTCTCTGCAACTCTCACATGGTCGCCCACTGAAACTAAGCAGGGCTGCGCCCGGTCAGTACCTGGATGCGAGACCACATGGGAAAGCTAGGTTGCTGCTGGAAGTG
264		2	8718608	8718732	plus	CAGACTTGCTGGCAGCTAGCTCTCTGCAACTCTCACATGGTCGCCCACTGAAGCTAAGCAGAGCTGCACCCGGTCAGTACCTGGATGGGAGACCACATGGGAAAGCTAGGTTGCTGCCGGAAGTG
265		2	8803171	8803284	minus	CGGCAGCTAGCTCTCTGCAACTCTCACATGGTTGCCCACTTAAACTAAGCAAGGCTGCGCCTTGTCTGTACCTGGATGGAAGACCATATGGGGAAGCTAGGTTACTGCCCGAAG
266		2	8881126	8881249	minus	ATTGACAGCCATGTCACCCTGCAGCCCAAGACCGCTTACTCACTGAAGCTAAGCAGGGCTGAGCCTGGTCAGTACCTGGATGGGAGACCACTAGGGAACACTAGGTTGCTGTTGGAAGTGGTGT
267		2	9080796	9080914	plus	TTTAGCCAGCAGCTAGCTCTCTGCAACTCTCACATTCTCGCCCATTGAGGCTAAGCAGGGCTGCAGACAGTCAGTACCTGGATGGGAGACCACATGGGAAAGCTAGGTTGCTGCCAGAA
268		2	9238304	9238421	minus	TATGCCGGCAGTTAGCTCTCTGCAACTCTCACATGGTTGCCCACTGAAGCTAAGCAGGGCTGCGCCCGGTCAGTTCCTGGATGGGAGACCACAAGGGAAAGCTAGATTGCTGCCGGAA
269		2	9608551	9608670	minus	CCACACAGCCATATCACTCTGCAGCCCAAGACTGGTTACTCACTGAAGCTAAGCAGGGCTGAGCCTGGTCATTACCTGGATGGTAGCCCATATGGAAAAAACTAGATTGCCATTTGAAGT
270		2	9890235	9890365	minus	CCCAACAATAATAATTGTAGATAGCTAGCTCTCTGCAACTCTCACAGAGTCGCCTACTTAAGCTAAGCAGGGCTCTGCCCAGTCCGTACCTGGATGGAAGACCACATGGGAAAGACAGGTTGCTGCTGGAA
271		2	10077708	10077832	plus	TACACACAGCCATATCACCCTGCAGCATAAGACCGGCTACTCACTGAAGCCAAGCAGGGCTGAGCCTGGTCAGTACCTGGATGGGAGACCACTAGGGAATACTAGGTTGCTGTTGGAAGTGGTGT
272		2	10133537	10133665	minus	TCAACAGCCACAGCCATATCACCCTGCAGCCCAAGACCGGTTACTCACTGAAGCTAAGCAGGGCTGAGCCTGGTCAGTACCTGGATGGGAGACCACTAGGGAACACTAGCTTGCTGTTGGAAGTGGTGT
273		2	10405636	10405759	minus	TAGCTAGCCGGCAGCTAGCTCTCTTCAACTCTCACATGGTCGCCCACTGAAGCTAAGCAGGGCTGCGCCCGGTCAGTACCTGGATGGGAGACCACATGGGAAAGCTAGGTTGCTGCCGGAAGTG
274		2	10408181	10408300	plus	GGCCACAGCCATATCCCTCTGCAGCCCAAGACTGGTTACTCACTGAAGCCAAGCAGGGCTAAGCCTGGTCAGTACTTGAATGGGAGACCAACATGGAAAAACTAGATTGATGTTGGAAGT
275		2	10509587	10509707	minus	GTAGCCGACAGCTAGCTCTCTGCAACTCTCACATGGTCGCCAACTAAAGCTAAGCAGGGCTGCGCCTGGTCAATACCTGGTTGGGAGACCACATGGGAAAGCTAGGTTGCTGCCGAAAGTG
276		2	11075289	11075412	minus	AGCCACAGCCATGTCACCCTGCAGCCCAAGACCGGTTACTCACTGAAGCTAAGCAGGGCTTTGCCTGGTCAGTACCTGGATGGGAGACCACTAGGGAACACTAGGTTGCTGTTGGAAGTGGTGT
277		2	11121461	11121582	minus	TCAGCTACAGCCATATCACCCTGCAGCCCAAGACCAGTTACTCACTGAAGCTAGACAGGGCTGAGCCTGGTCAGTACCTGGATGGAAGACCACATGGGAAAAACTAGGCGGCTGTTGAAAGT
278		2	11223058	11223191	plus	TTCAACTGTGAAAGCAATGAATCACTCTCGACCTGTGAATACAGACAACTGAGTGCTTACAGCTGAATCACTGAGCCTGGCCTGGACAGTACCTGGATGGGAGACCACATGGGAAAACTAGGTTGCGGATGGAA
279		2	11236738	11236857	minus	TGCCACAGCTATATTACCCTGCAGCCCAAGACCGCTTACTGAAGCTAAGCAGGGCTGAGCCTGGTCAGTACCTGGATGGGAGACCATATGGGAAAACTAGGTTGCTGTCGGAAGTGGTGT
280		2	11349069	11349177	plus	AAAAAGCTCTCTGCACCTCTCACATGGTCACTCACTGATACTAAGCAATGCTTTGCCTGGTCAGTACCTGGATGGGAGACCACATGGGAATACTAGGTTGCTGCAGGAA
281		2	11369323	11369439	plus	TTGCCGGCAGCTAGCTCTCTGCAACTCTCACATGGTCACCCACTGATGCTAAGCAGGGCTGCGCCCGGTCAGTACCTGGATGGGAGACTACATGGGAAAGCTAGGTTGCTGCTGGAA
282		2	11460287	11460408	plus	TCCAGGATCACATAAACAACCCAAATTCTGAATTTGGGTTGTGAATTCTGAAGCTAAGCAGGGCTGAGCCTGTTCAGTACCTGGATGGGAGACCACTAGGGAATACTAGGTAGCTATTGGAA
283		2	11940883	11941010	plus	ATATCGCCACAGCCATATCACCCTGCAGCCCAAGACTGGTTACTCACTGAAGATAAGCAGGGCTGAGCCTGGTCAGTACCTGGATGGTAGACCACTAGGGTAAACTAGGTTGCTGTCGGAAGGGGTGT
284		2	12440824	12440938	minus	CAATAGCCGGCAGCTAGCTCTTTGCAACTCTCACATGGTCGCCCACTGAAGCTGGGCTGCGCCCAATCAGTACCTGGATGGGAGACCACATGGGAAAGCTAGATTACTGTTGGAA
285		2	12922748	12922860	minus	TGCCGACAGCTAGCTCTCTGCAACTTTCACATGGTTGCCCACTAAATTTAAGCAGGGCTGCGCCTGGTCAGTACCTTGATTGGAGACCACATTGGAAAGCTAGGTTGCTCCAG
286		2	13440781	13440899	plus	GCCACAGCCATATCACCCTGTAGCCCAAGACCAGTTTCTCACTGAAGCTAAGTAGGGCTGAGTCTGGTCAGTACCTGGATAGGAGACCACATAGGAAAACTAGGTTGCTATTGGAAGTG
287		2	13701300	13701420	plus	ATGGCCGGCAGCTAGCTCTCTGCAACTCTCACATGGTCGCCCACTGAAGCTAAGCAGGGCTGCGCCCGGTCAGTACCTGGATGGGAGACCACATGGGAAAGCTAGGTTGCTGCTGGAAGTG
288		2	13879311	13879426	minus	TAGCTGGCAGCTAGCTCTCTGCAACTCTTAAATGGTCGCCCAATGAAGCTAAGCAGGGCTGCGCCCGGTCAGTACCTGGTTTGGAGACCACATGGGAAAGCTAGGTTGCAGCCGGA
289		2	15795973	15796094	plus	AATTGCCGGCAGCTAGCTCTCTGCAACTCTCACTTGGTCGCCCGCTGAAGCTAAGCAGGGCTGCGCCCGGTCAGTACCTGGATGGGAGACCACATGGGAAAGCTAGGTTGCTGCCGGAAGTG
290		2	16050195	16050311	plus	TAGACAGCTAGCTCTCTGCAACTCTCACATGGTCGCCCACTGAAGCTAAGCAGGGCTGCGCCCGGTCAGTACCTGGATGGGAGACCACATGGGAAAGCTAGGTTGTTGCCGGAAGTG
291		2	16199831	16199952	plus	ATTGGCCACAGCCATATCACCCTACATTTCAAGAACAGTTACTTATTGAAGCTAAGCAGGGCTAAGCCTGGTCAGTACCTGGATGGGAGACCACATGGGAAAACTAGGTTGCTGCTGGAAGT
292		2	16947350	16947467	minus	TAGCCAGCAGCTAGTTCTCTGTAATTTTCACATGGTCGCCCTCTAAAGCTAAGCAGGGGTGCGCCCGGTCAGTACCTGGATGGGAGACCACATGGCTAAAGCTAGGTTGCTGCCGGAA
293		2	17273096	17273222	minus	GTCAAAGGCATATCACCCTGCAGCCCAAGACCGGTTACTCACTGAAGCTAAGCAGGGCTGGCTGAGCCTGGTTAGTTCCTGGATGGGAGAAAACTAGGGAACAACAGGTTGCTGTTGGAAGTGGTGT
294		2	17986789	17986908	plus	TTCACCACAGCTATGGCACCCTGACGCCCAAGACCGATTACTCCCTGAAGCTAAGCAGGGCTGAGCCTGGTCAGTACCTGGATTGGAGATCGCATGGGAAAACTAGGTCGCTGCTGAAAG
295		2	18025089	18025207	minus	AAATGCCGGAAGCTAGCTCTCTGCAACTCCCACATGGTCACCCACTGAAGCTAAACAGGGCTGCGCCCAGTCAGTACCTGGATGGGAGACCACATGGGAAAGCTAGGTTGCTGTCAGAA
296		2	18300844	18300950	minus	AATGGAACCAGCAGCTATAGCTCTCTGCAACTCTCACATGGTCGCCTACTAATGCTAATCAGTACCTGGATGGGAGACCACATGGGAAAGCTATGTTGCTGTTGGAA
297		2	18583330	18583442	minus	GCAGCTAGCTCTCTGCAACTCTCACATGGTCGCCCACTGAAGCTAAGCAGGGCTGCGCCCGGTCAGTACTTGGGATGGGAGACCAGCTAGGTTGCTGCCGGAAGTGGTGTTAG
298		2	18605179	18605291	minus	GCAGCTAGCTCTCTGCAACTCTCACATGGTCGCCCACTGAAGCTAAGCAGGGCTGCGCCCGGTCAGTACTTGGGATGGGAGACCAGCTAGGTTGCTGCCGGAAGTGGTGTTAG
299		2	18853044	18853156	plus	GCAGCTAGCCCTCTGCAACTCTCACGTGGTCGCCCACTGAAGCTAAGCAGGGCTGTGCCTGGTCAGTACTTAAATGGGAGACCACATGGAAAAGCTATAGGTTGGTGCTGGAA
300		2	18921502	18921620	plus	TATAACAGCCATATCACCCTGCAGCCCAAGACCGGTTACTCACTGAAGCCAAGCATGGCTGAGCCTGGTCAGTACCTGGATGGGAGACCACTTGGGAAAACTAGGTTGCCGCTGGATGT
301		2	19490675	19490794	plus	TATTAGCCGGCAGCTAGCTCTCTGCAACTCTCACATGGTCGCCCACTGAAGCTAAGCAGGGCTGCGCCCGGTCAGTACCTGGATGGGAGACCACATGGGAAAGCTAGGTTGCTGCCAAAA
302		2	20598415	20598540	minus	ACTTACACAGCCATGTCACCCTGCAGCCCAAGACCGGTTACTCACTGAAGCTAAGCAGGGCTGAGCCTGGTCAGTACCTGGATGGGAGACCACTAGGGAACACTAGGTTGCTGTTGGAAGTGGTGT
303		2	20793508	20793630	minus	AATGCCAGCAGCTAGCTCTCTGCAACTTTCATATGTTCATCCACTGAAGCTAAGCTAAGGGCTTTGGCCAGTAGGTACCTAGAAGGGAGACCACATGGGAAAGCTAGGTTGCTGCTGGAAGTG
304		2	20828261	20828383	minus	ACCATTAGCTGGCAGCTAGCTCTCTGCAACTCTCACATGGTCGCCCACTGAAACTAAGCAGGCCTGCGCCTGGTCAATTCCTGGATGGGAGACCACATGGGAAAGCTATGCTGCTGCCAGGAG
305		2	20878650	20878770	plus	TAAATAGCTAGTAACTAGCTCTCTGTAACTCTCACATGGTCACCCACTGAAGCTAAGCAGGGCTGTGCCTAGTCAGTACCTGGATGGGAGCCCACATGGCAAAGTTAGGTTGCTGCCGGAA
306		2	21099610	21099727	minus	TGCCGCAGCCATATCACCCTGCAGCCCAAGACTAGTTACTCACTTGAAGCTAAGCAGGGGTGAGCCTGGTCAGTACCTAGATGGGAGACCACATGGGAAAACTAGGTTGCAGTTGGAA
307		2	21536866	21536986	plus	TAAACAGATATAACACCCTGCAGCCCAAGACCAGTTACTCACTGAAGTTAAGCAGGGCTGAGCCTGGTCAGTACCTGTAGGGGAAAACTACCACATGGGAAAACTAGGTTGCTGTTGGTAA
308		2	21937266	21937383	plus	TTGCCGGCAGCTAGCTCTCTGCAACTCTCACATGGTCACCCACTAAAGCTAAGCAGGGCTGTGCCCGGTCAGTGCCTGGATGGGAGACCACATGGGAAAGGTAGGTTGCTGCCAGAAG
309		2	21997267	21997375	minus	GCCGACAGCTAGCTCTCTGCAACTCCCAGATGGTCGCCCACTGAAGGTAAGCATGGCTGTGCCCGGTCAGTACCTAGATGGGAGACCACATGGAAAAGCTAGGTTGCTG
310		2	22600564	22600677	minus	GTATAAAGCCAGCAGCTAGCTCTCTGCAACTCTCACATGGCCCACTGAAGCTAAGCAGGGCTGTCATCAGTACATGGATGGGAGACCACATAGGAAAGCTAGGTTGCTGCCAGA
311		2	22778779	22778892	minus	AGCCATATCACCCTGCAGCCCAAGACCGGGTACTCGCCACTGAAGTTAGGCAGGGCTGAGCCTGGTCAGTACCTGAATGGGAGACCACATGGACAAGCTAGGTTGCAGCTGGAA
312		2	23017067	23017186	plus	TTTTGCTGGCAGCTAGCTCTCTGCAACTCTCTTGTGGTCCGCCACTGAAGTTAAGTAAGGCTGCGCCTGGTCAGTACCTGGATGGGAGACCACATGAGAAAGCTAGGCTGCTGCTGGAAA
313		2	23046011	23046125	plus	GCTGGCAGCTAGCTCTCTGCAACTCTCACGTAGTTGCCCAATGAACCTAAGCAGGATTGTGCCTGGATAGTACCTGGATGGGAGACCACATGGGAAAGCAAGGTTTCTGCTAGAA
314		2	23241637	23241741	minus	CATATCACTCTGCAGCCTAAGACCGGTTACTTACTGAAGCTAAGCAGGACTAAGCCTGGTCAGTACCTGCATGGGAGACCACATAGGAAAACTAGGTAGCTGTTG
315		2	23581930	23582048	plus	ACTGTCGGCAGCTAGCTCTCTGCAACTCTCACATGGTCGCCCACTGAAGCTAAGCAGGGCTGCGCCCGGTCAGTACCTGGATGGGAGACCACTTGGGAAAGCTAGGTTGCTGCCGGAAG
316		2	23602126	23602246	plus	CAATGTAGTTAGGATAGCACTATTTGATGTATTTCTGGGGAGCCCACTGAAGCTAAGCAGGGCTGTGCCCGGTCAGTATCTGGATGAGAGACCACATGGGAAAGCTAGGTTGCTGCTTTAA
317		2	24024222	24024338	plus	AGCCACAGTCATATCACCCTGCAGCCCAAGACTGGTTACTCACTGAAGCTAAAGAGGGCTGAGCCTGGACAGTACCTGGATGTGAGATCACATGGGAAAACTAGGTAGCTGTTGGAA
318		2	24349565	24349671	minus	TGACAGCTAGCTCTCTGCTACTCTTACATGGTTGCCCTCTAAAGCTAAGCAGGGCTGCGCCCGGTCAGTACCTGGATGGACCACATGAGAAAGCTAGGTTGCTGCCA
319		2	24850325	24850439	minus	GTCACAGCCATTTCACCCGGCAGCCCAAGAACGGTTTCTCACTGAAGCTAAGCAGAGCTGAGCCTGGTCAGTACCTAGATGGGAGACCACATGGGAAAACTAGGTTGCTGCTGGT
320		2	25240106	25240219	minus	CTGGCAGCTAGCTCTCTGCAACTCTCACATGGTCGCCCACTGAAGCTAACCAGGGCTGCGCCCGGTCAGTACATGGATGGGAGACTACATAGGTAAGCTAGGTTGCTGTTGGAA
321		2	25332815	25332941	minus	AACAGCCACAGCCATGTCACCCTGCAGTCCAAGACCGGTTACTCACTGAAGCTAAGCAGGGCTGAGCCTGGTCAGTACCTGGATGGGAGACCACTAGGGAACACTAGGTTGCTGTTGGAAGTGGTGT
322		2	25500222	25500324	minus	AGCCATAGCCATATCACCCTGCAGCTCAAGACTGGTTACTCACAGAAGTTACGCAGGGCTGAGCCGGGTCAGTACCTGTATGGGAGGTCACATGGGAAAACTA
323		2	25669385	25669505	minus	TACCCAGCCATATCAGCCTGCAGCCAAAGACCGGTTACTCACTGAAGCTAAGCAGGGCTGAACCTGGTCAGTATCTGGATGGGAGACCACATGGGAAAACTAGGTTGCTGCTGGAAGTGGT
324		2	26199994	26200114	plus	TGCCCCAGACATATCACCATGCAGCCCAAGACTGGTTACTCACTGAAGCTAAGCAGGGCTGAGCCTGGTCAGTACTTGGACGGGAGTCCACATGGGAAAAACTAGGTTGCTGTTGGAAGTG
325		2	26429526	26429645	minus	TATGACAGCCATTTCACCCTAAAGTCCAAGACCGGTTACTCACTGAAGCTAAGCAGGGCTGAGCCTGGTCAGTACCTGGATGGGAGACCACATGGTAGAAGCTAGGTTGCTTTTGGAAGT
326		2	26630375	26630477	minus	CTCTCTGCAACTCTCACATGACTGCCCACTGAAGCTAAGCAAGGCTGGGCCTGGTCAGTACCTGGATGGGAGACCACATGGGAAAGTTAGGTTGCTGCTAGAA
327		2	27004412	27004522	plus	TTTGCCTGCAGCTAGCTCTTTGCAACTCTCACATGGTCACCCACTGAAGCTAAGCAGGGCTGCGCCCAGTCAGTACCTGGATGGGAGACCGCATGGGAAAGCTAGTTTGCT
328		2	27578030	27578146	minus	GCCACAGCCATATGACCCTGCAGCCCCAGACCGGTTACTCACTGAAGCTAAGCAGGGTTGAGCCTGGCCACTACCTAAAGGGAGTCTAAATGAGAAAACTAGGTTGCTGTTGGAAGT
329		2	27755501	27755619	plus	TGCCACAGCCATATCACCCTGAAGCCCAAGACCAGTTACTCACGGAAGCTAAGCAGGGTTGAGCCTGGTCAGTACCTGGATGGGAGACCACATGGGAAAGCTAGGTTGCTGTTGGAAGT
330		2	27992019	27992140	plus	ACAAAGCCATATCACCCTGCAGACCAAGACCAGTTACTCACTGAAGCTAAGCAGGGCTGAGCCTGGTCAGTACCTGGATGGGAGACCACATGGTAAAACTAGGTTGCTGTTGGAAGTGCTGT
331		2	28006655	28006773	plus	TTTTGCTGGCCGTTAGCTCTCTGCAACTCTCAAATGGTCGCCCACTGAAGCTAAGCAGGGCTGCGCCTGGTCAGTACCTGGATGGGAGACCACATGGGAAAGCTAGGTTGCTGCCGGAA
332		2	28349619	28349730	plus	GGCAGTTAGCTCTCTGCAACTCTTACATGGCTGCAGAATGAAGCTAAGCAGGGCTGTGCCCGGTCAGTACCTCGATGGGAGACCACATGGGAAATCTAGGTTGCTACCGGAA
333		2	28728782	28728892	minus	AAACAAAAACTAGGCAGCTAGCTCTCTGCAACTCTCACATGGTCGCCCACTGAAGCTAAAGTCCTGAAGTCAGTACCTGGATGGGAGACCACATGGGAAAGCTAGTTTGCT
334		2	28767431	28767544	minus	AGTAACTGCCGGCAGCTAGCTCTCTGCAACTCTCACATGGTTGCCCACTGAAGCTAAGCAGGGAAGTACCTGGATGGGAGACCACATGGGAAAGCTAGGTTGCTGCTGGAAGTG
335		2	29221829	29221933	plus	GCTAGCTCTCTGCAACTCTCACATGGTCTTCCACTAAAGCTAAGCAGCACTGTGCCCGGTCAGTACCTGGATGGGAAACCACATAGGAAAGTGTTGCTGCTGGAA
336		2	29249357	29249467	minus	GCAGCTAGCTCTCTGCAGCTCTTACATGGTCACCCACTGAAGCTAAGCAGGGCTGCGCCCCGTCAGTACCTGGATGTGAGACTGCATGAAAAAGCTAGGTTGCTATCGGAA
337		2	29336596	29336722	plus	ACATGCCACAGCCATGTCACCCTGCAGCCCAAGACCGGTTACTCACTAAAGCTAAGCAGGGCTGAGCCTGGTCAGTACCTGGATGGGAGCCCACTAGGGAACACTAGGTTGCTGTTGGAAGTGGTGT
338		2	29517329	29517449	minus	AATGCCAGCAGCTAGCTTTCTGCAACTCTAACATAGTCGCCCACTGAAGTTAAGCAGGGCTGTGCCTGGTCAGTACCTGGATGGGAGACCACATGGGAAAGCTAGGTTGCTGCTGGAAGTG
339		2	29559959	29560070	minus	GGCAGCTGGCTATCTGCAACTCTCACATGGTCACCCACTGAAGCTAAGCAGGGCTGCCCCTGGTCAGTAGCTGGATGGGAAACTACATGGGAAAGCTAGGTTTCTGTCAGAA
340		2	29694377	29694502	plus	TACCACAGCCATATCACCCTGCAGCCCAAGACTGGGTTACTCACTGAAGCTAAGCAGGGCTGAGCCTGGTCAGTATCTGGATGGGAGACCACATGGAGAAAACTAGGTTGCTGTAGGAAGTGGTGT
341		2	29737437	29737554	minus	TAGCAAGCAGCTAGCTCTCTGCAACTCTCACATGGTCACCCACTGAAGCTAATCAAGGCTGCACCCGGTCAGTACCAGGATGAGAGACCACATGGGATAGCTAAGTTGCTATCTGAAA
342		2	29853442	29853552	plus	CACAGCCATATCACCCTGTAGCCCAAGATCGGTTACTCACTAAAGCACTAAGCAGGACTGAGCCTGGTCAGTACCTGCATGGCCACATGGGAACACTAGGTTGCTGTTGGA
343		2	30020991	30021118	minus	CACATATAGCCATATCACCCTGCAGCCCAAGACCGGTTACTCACTAAAGCTAAGCAGGGCTGAGCCTGGTTAGTACCTGGATGGGAGACCACTAGGGAACACTAGGTTGCTGTTGGAAGTGGTGTTAG
344		2	30377479	30377590	plus	TGTCAGCAGCTAGCTTTCTGCAACTATTACATGGTCGCCCACTAAAGCTAAGCAGGGCTGCTCCAGGTCAGTACCTGCATGGGAGACCTCATGGAAAAGCTATGGTTGCTGC
345		2	30561711	30561835	minus	TTTGTACAGCCATATCACCCTGCAGCCCAAGACCGGTTACTCACTGAAGCTAAGCAGGGCTGATCCTGGTCAGTACCTGAATGGGAGACCAATAGGGAACACTAGGTTGCTGTTGGAAGTGGTGT
346		2	30768444	30768576	minus	TGCATCAGACCCAACTTTAGATACACCCTCCATCAAGCATTAATGTTGAAGCCCTGTTTGAAGCTAAGCAGAGGGGAAGCCTGGTCGGTATCTGGGTGGGAGACCACATGGAAAAACTAAGTTGCTGTTGGAA
347		2	31904192	31904308	minus	AAGCCAACAGCTAGCTCTCTGCAACTATCTCATGGTTGCCCACTGAAGCTAAGCAGGGCTGTATCTGGTCAGTACCTGGATGGGAGACCACATGGGAAGACTAGGTTGCTGCAGGAA
348		2	31932794	31932905	plus	CAGCCATATCACCCTGCAGCCGAAGACTGATTACTCACTGAAGCTAAGCAGGGCTGACCCTGGTCAGTACCTGAATGGGAGACCACATTGGAAAACTTGGTTGTTGTTGGAA
349		2	32153188	32153314	plus	CTAAGCCACAGCCATGTCACCCTGCAGCCCAAGTCCGGTTACTCACTGAAGCTAAGCAGGGCTGAGCCTGGTCAGTACCTGGATGGGAGACCACCAGGGAATACTAGGTTGCTGTTGGAAGTGGTGT
350		2	32180974	32181094	plus	CATGCCGGCAGCTAGCTTTCCGCAACTCTCAAATGGTCGCCCACTGAAGCTAAGCAGGGCTGTGCCCGGTCAGTATCTGGATGGGAGACCACATAGGAAAGCTGGGTTGCTGCCGGAAGTG
351		2	32310183	32310293	minus	TAGCTAGCTCTCTGCAACTCTTACATGGTCGCCCACTGAAGCTAAACAGGGCTGTACCCAGTCAGTACCTTGATGGGAGACCACAAGGGAAAAGCTGGGTTGCTGCCTGAA
352		2	32415069	32415186	minus	TGCCAGCAGCTAGCTCTCTGCAACGCTCACATAGTCACCCACTGAAGCATACAGGGCTGCACCCAGTCTGTACCTGGATGGGAGACCACATGGGAAAGCTAGGTTGCTGCCGGAAGTG
353		2	32436712	32436828	plus	TGGCCGGCAGCTAGCTCTCTGCAGCTCTCACATGGTCGCCCACTGAAGCTAAGCAGGGCTGCACCTGGTTAGTACCTGGATGGGAGACTACATGGGAAAGCTAGGTTGCTGCTGGAA
354		2	32596679	32596782	plus	TTAGTCAGCTAGATCTCTGCAACTCTCACATGGTTGCCTACTAAAGCTAAACAGCGCTGTGCTGTCGCTACCTGGATGGGAGACCACATGGGAAAGCTAGGTTG
355		2	32596896	32597016	plus	TTAGTCGGCAGCTAGCTCTGTGCAACTCTCACATGATCGCCCACTGAAGTTAAGCAGGGATGCACCCGGTCTGTACCTGGATGGTAGACCACATGGGAAAGCTAGGTTGCTGCCGGAAGTG
356		2	32694549	32694672	minus	TGCCACAGCCATATCACCCTGCAGCCCAAGACCGGTTACTCACTGAAGCTAAGCAGGGCTGAGCCTGGTCAGTACCTGGATGGGAGACCACTTGGGAACACTAGGTTGCTGTTGGAAGGGGTGT
357		2	32762219	32762338	plus	ATAAACATCCATATCACCCTGCAGCCCAAGACTGGTTACTCACTGAAGCTAAGCAGGGCTGAGCCTGGTCAGTACCTGGATGGGAGACCACATGAGAAAGCTAGGTTGCTATTAGAAGTG
358		2	33586702	33586824	minus	TGCAGTCACAGCCATATCACCCTGCAGCCCAAGACCGGTTACTCACCGAAGCTAAGCAGAACTGAGTCTGGTCAGAATCTGGATGGGGAGACCACATGGAAAAACTAGGTTGCTGTTAGAAGT
359		2	34192134	34192236	plus	CAGCCCAAGACCAGTTACTCACAGAAGCTAAGCAGGGCTGAGCCTGGTCAGTACCTGGATGGAAGACAGCATAGGGAAACTAGGTTGCTGTAGGAAGTGGTGT
360		2	34371199	34371320	plus	CTTAGCCGGCAGCTAGCTCTCTGCAACTCTCACATGGTCGCCCACTGAAGCTAAGCAGGGCTGCGCCTGGTCAGTACCTGGATGGGAGACCACATGGGAAAGCTGGGTTGCTGCCGGAAGTG
361		2	34403863	34403984	minus	CTAACATCTGGCAGCTAGCTCTCTGCAACTCTCACATGGCCACCCACTAAAGCTAAGCAGTGCTGCGAACGGTCATTTCCTGGATGAGAGAACACATGGGACAGCCGGGTTGCTTCCAGAAG
362		2	34425326	34425445	minus	CCAAAAAATTATCGGCAGCTGGCTCTCTGCAACTCTTACATGGTCACCCGCTAAAGCTAAGCAGGGCCTGGTCAGTACCTGGATGGAAGACCACATGGGAAACCTAGGTTGCTGCCGGAA
363		2	34529993	34530115	minus	GCCACAGCCATATCACCCTGCAGCCCAAGACCGGTTACTCACTAAAGCTAAGCAGGGCTGAGCCTGGTTAGTACCTGGATGGGAGACCACTAGGGAACACTAGGTTGCTGTTGGAAGTGGTGT
364		2	34719703	34719816	minus	TTTGTTTTGGCTCTCTGCAACTCACATGGTTGCCCACTGAAGCTAAGAAGGGCTGCGACCAGTCAGAACCTGGATGGGAGACCACATGGGAAAGCTAGGTTGCAGCCGGAAGTG
365		2	34742604	34742717	minus	AGCCGGCAGCTAGCTCTCTGCAACTCTCACATGGTCGCAAATTGAAGCTAGGCAGGGCTGCACTTTCAGTACCTGGTTGAGAGACCTCATGGAAAAGCTAGGTTGCTGCTGAAA
366		2	34892985	34893095	minus	AACAGCCACAGCCAAATCACCCTGCAGCCCAAGACCGGTTACTCACTGAAGTTAAGCAGGGCTGAGCCTAGTCAGTACCTGGATGGGAGACCACATGGGAAAAATATGTTT
367		2	34991007	34991127	plus	TAGCCACAGCCATATCACACTGCAGCCCAAGACCGCTTACTCACTGAAGCTAAGCAGGGCTGAGCCTGGTCAGTACTTGGATGGGAGACCACATGGGAAATCTTGGTTACTATTGGAAGTG
368		2	35005507	35005610	minus	GCAGCCAGCTCTCTGCCACTATCACATGGTCACCCACTGAAGCTAAGCAGGGATGTCCGTGGTCAGTACCTGTATAAGAGACCACATAGGAAATCTAGGTTGCT
369		2	35256095	35256210	minus	GCCACAGCATATCACCCTGCAGCCCAAATACTGGTTACTTACTGAAGCTAAGCAGGGTTGAGCCTGGTCAGTACCTGGATGGGAAACCACATGGGAAGACTAGGTTGCTGTTGGAA
370		2	35344488	35344598	plus	AGCCACAGCCATATTACCCTGCAGCCCAAGACTGGTCATGCACTGAAGTCAAGCAGGGCTGAATCTGGTCAGTATATGGATGGGAGACCACATGGGAAAACTAGGTTGTCT
371		2	35385415	35385517	plus	TCTCTGCAACTCTCACATGGTCACCCACTGAAGCTAAGCAGGGCTGCACCCGGTCAGTACCTAGATGGAAGACCACATGGAAAAGCCAGGTTGCTGCCGGAAG
372		2	35659890	35660008	plus	ATTGCCAGCAGCTAGCTCTCTGCAACTCTCACATGGTCACCAACTGAAGCTAAGCAGGGCTGTGTCCGATCAATACCTGGATGCGAGATCACATGGGAAAGATAGGTTTCTGTCGGAAG
373		2	35704078	35704183	minus	GGCAGCTAGCTCTGTGCAACTCTCACATCGTCGTCCACTGAAGCTAAGCATGGCTGCGCCCAGTCAGTACCTCGATGGGAGACCACATGGGAAAGCTAGATTGCTG
374		2	35848873	35848990	plus	CTAATAGCCATATCACCCTTCAGCCAAAGACCGGTTACTCACTGAAGCTAAGCAGGACTGAGCCTGGTCAGTACCTGAATGGGAGACCACTTAGGAAAGCTAGGTTGCTGTTGTAAGT
375		2	36613441	36613560	minus	GCCACAGCCATATCACCCTGCAGCCCAAGACCAGTTACTCACTGAAGATAAGCAGAGCAGAGCCTGGTCAGTACCTGGATGGGAGACCATACGGAAGTTGGAAGTGGTGTTAGTTAGCCA
376		2	36981251	36981379	minus	TTAATTATTTTGTCGGCAGCTAGCTCTCTGCAACTCTCACATGGTCGCCCACTGAAGCTAAGCAGGGCTGCGCCCGGTCAGTACCTGGATGGGAGACCACATGGGAAAGCTAGGTTGCTGCCGGAAGTG
377		2	37525818	37525931	minus	CCACAGCCATATCACCCTGAAGCCCAAGAATGGACGCTCTCTGAAGCTAAGCAGGGCTGAGCCTAGTTAGAACCTGGATAGGAAACCACATGAAAAAAACTATTGCTGTTTGAA
378		2	38657029	38657149	minus	TTTCATATTCATATCACCATGCAGCCCAAGAATGGTTACACACTGAAGCTAAGCAGGGCTGAGCCTGGTCAGTACCTGAATGGCAGATCACATGAAAAAAACTAGGTGGCTGTTGGAAGTG
379		2	39319560	39319677	plus	GCCATAGCCATATCACCCTGCAGCCCAAAACCGGTTACTCACTGAAGCCAAGCAGGGCTGAGCCTGGTTAGTACCTGGATGGGAGACCACTAGGGAACACTAGGCTGCTGTTGGAAGT
380		2	39369962	39370078	minus	TGCCGGCAGCTAGCTCTCTGCAACTCTCACATGGTCACCCACTGGAGCTGAGAAGGGCTGCGCCCGGTTAGTTCCTGGATGGGAGACCACATGGGAAAGCCAGGTTGCTGCCGGAAG
381		2	39405171	39405288	minus	AGCCACAGCCATATCAACCTGCAGCTCAAGACCGGTTACTCACTGAAGCTAAGCAGGGCTGAGCCTGGTTAGTACCTGGATAGGAGACCACATGGGAAAACCAGGTTGCTGTTGAATG
382		2	39771153	39771276	plus	CAAAACAGCCATATCACTCTGCAGTCCAAGACCGGTTACTCACTGAAGCTAAGGAGGGCTGAGCCTGGTCACTACCTGGATGGGAGGCCACATGGGAAAACTAGGTTGCTGTTGGAAGTGGTGT
383		2	39984731	39984848	minus	CCATGCTGGCAGCTAGCTCTCTACAACTCTCACATGGTCACCCACTGAATGTAAGCAGGGCTGCGCCCGGTCAGTACCTGGATGGGAGACCACATGAGAAAGCTAGGTTGCTGTCAGA
384		2	40091260	40091377	plus	TGCCACAGCCATATCACCCTGCAGCTCAAGACCGGTTACTCACTGAAGCTAACCAGGACTGAGTACTGGTCAGTACCTGAATGGAAGACCACATGGAAAAACTAGGTTGCTGTTGTAA
385		2	40130429	40130546	minus	AAAGCTAGCAGATAGCTCTCTGCAACTCTCACATGGTCGCCCACTGAAGCTAACAGGGCTGCACCCGGTCAGTACCTGGATTGGAGACCACATGGGAAAGCTAGGTTGCTGTCGGAAG
386		2	40690705	40690829	minus	TATCCACAGCCATATCACTCTGCAGCCCAAGACCGGTTACTCACTGAAGCTAAGCAGGGCTAAGCCTGGTTAGTACCTAGATGGGAGACCAGACGGGAAAACTAGGTGGCTGTTGGAAGTGGTGT
387		2	40710543	40710656	minus	ATCCACAGCATATCACCCTGCAGCCCAAGAGTTATTCACTCAAGCTAGCAGGGCTGAGCCTGGTCAGTACCTGGATTTCAGGCCACATGGGAAAACTAGGTTGCTGTTGAAAGT
388		2	40741141	40741260	minus	GCTTACGGCCATTCCACCCTGAGCACGCCCAATCTTTTCAGATCTCGGAAGTTAAGCAGGGTTGGCTCATGGTTATTACTTGGATGAGAGACAGCCTGGGAATACCAGGTGCGGTAAACT
389		2	40827379	40827481	minus	AGCTAGCTCTCTACAACTCTTACATGGTCGCCCACTAAAGCTAAGCAGGGCTGTGCTTGGTCAGTGCCTGGATGGGAAACGACATGGGAAAGCTAGACTGCTG
390		2	40949720	40949827	minus	AGCCACAGCCATGTCACCCTGTAGCCCAAGATTGGTTATTCACTGAAGCTAAGCAGAGCTGAGCCTGGTCATGGGAGACCACATGGGAAAACTAGGTTGCTGTTGGAA
391		2	41126940	41127059	plus	TTTCCACAGCCATATCACCCTGCAGCACAAGACCGGTTACTCACTGATGCTAAGCAGGGCTGAGCCTGGTCAGTACATGGATGGGAGACCACATTGGAAAACTAGGTTGCTGTTGAAAGT
392		2	41181839	41181958	plus	AAAGCAATAGCAGTTAGCTCTTTGCATCTCTCACATGGTCGCCCATTGAAGCTAAGCAGGGCTGCGCCCGGGCAGTACCTGGATGGGAGACCACATGGGAAAGCTAGGTTGTTGTGGGAA
393		2	41299029	41299152	minus	TGCCACAGCCATATCACCCTGCAGCCCAAGACCGGTTACTCACTGAAGCTAAGCAGAGCTGAGCCTGGTTAGTACCTGGATGGGAGACCACTAGGGAACACTAGGTTGCTGCTGGAAGTGGTGT
394		2	41402642	41402758	minus	ATGTTGGCAGCTAGCTCTCTGCAACTCTCACATTGTCGTCCATTGAAGCTAAGCAGGGCTGTGCCTGGTCAGTACCTGGATGTGAGACCACATGGGAATGCTAGATTGCTGCCAGAA
395		2	41506124	41506242	minus	TTTTGCTGGCAGCTAGCTCTCTGCAACTCTCACATGGTCGCCCACTGAAGCTAAGCAAGGTTGTGCCTGGTTTGTACCTGGATGGGAGACCACATGGGAAAGCTAGGTTGCTGCCAGAA
396		2	41571948	41572057	minus	AGCCATATCACCCTGCAGCCCAAGATCGATTACTTACTGAAGCTAAGCAGGCCCTAGCTTGGTTAGCACCTAGATGGGAGACCAAATGGGAAAACTAGGTTGCTGTTGGA
397		2	41847598	41847715	plus	TTTGCTCGCAGCTAGCTTTCTGCAACTCTCACATGGTTGCCCACTAAAGCCAAACAGGGCTGCGCCCGGTCAGTACCTGGATGGGAAACCAAATGGAAAAGCTAGGTTGCTGCTGGAA
398		2	41867952	41868080	minus	GCCACAGTCACAGTCATGTCACCCTGCAGCCCAAGACCGGTTACTCACTGAAGCTAAGCAGGGCTGAGCCTGGTCAGTACCTGGATGGGAGACCACTAGGGAACACTAGGTTGCTGTTGGAAGTGGTGT
399		2	41956969	41957093	minus	TGGCCACAGCCATATCAACCTGCAGCCCAAGACCGGTTACTCACTGAAGCTAAGCAAGGCTGAAACTGGTCAGTACCTGGATGGGAAACCACATGGGAAAACTAGGTTGCTGTTGGAAGTGGTGT
400		2	42085971	42086086	minus	AACCTCAGCCACATCATCCTGCAGACCAAGACCGGTTACTCACTGAAGCTAAGCAGGGCTGAGCCTGGTAAGCATCTAGATGGAAGACCATAAAAACCAGGTTGCTTTTGGAAGTG
401		2	42548871	42548992	minus	ATTATAGCCGGCAGCTAGCTCTCTGCAACTCTCACATGGTCTCCCACTGAAGCTAAGCAAAGCTGCACCCTATCAGCACCTGGATGGGAGACCACATGGGAAAGCTAGGTTGCTGCCAGAAG
402		2	42558164	42558278	plus	ACATTCTAGCTCTCTGCAACTGTCACATGGATGCCCATTGAAGGTAAGCAGGGCTGTGCCCGGTCAGTACCTGGATGGGAGACCACATGGGAAAGCTAGGTTGCAGCTGGAAGTG
403		2	42574266	42574380	plus	TCCACAGCCATATCACCATGCAGGCCAAGACCAGTTACTCACTGAGACTAACCAGGGCTGAGCCTGGTAAGAACCTGGATGGGAGACCACATTGGAAAACTAGGTTGCTTTTGGA
404		2	42937821	42937939	plus	TATAACCGGCAGATAGCTCTCTCTGCAACTATCACATGGTCGCCCACTTTAGCTAAGCAGGGCCCGGTCAGTACCTGGATGGGAGACCACATGGGAAAGCTAGGTTGCTGCCGGAAGTG
405		2	43044123	43044230	minus	CACAGTCATATCACCCTGCAGCCCAAGACCGGTTACTCCCTGAAGCCAAGTAAGGCTGAGGTCAGTGCCTGGATGGGAGACCACATGGGAAAACTAGGTTGGTGTTAG
406		2	43149384	43149504	plus	TATTGCGGCAGCTAGCTCTCTGCAACTCTCATATGGTCGCCCACTGAATCTATGCAGGGCTGTGCCTAGTCAGTTCCTGGATGGGAGACCATATAGGAAAGCTAGGTTGGTGCTAGAAGTG
407		2	43226305	43226417	plus	TGCCGGCAGCTAGCTCTCTGCAACTCTCATGTGGTTGCCCACTGAAGCTAAGCAGGGCTGTGCCCGGTCAGTAACTAGATAGGAGACCACATAGGAAAGCTAGGTTACTAGCT
408		2	43373027	43373147	minus	TCAATTGCCGGCAGCTAGCTGTCTGCAGCTAACACATGGTCGACCACTGAAACGAAGCAGGACTGTGCCTGGTCAGTACCTGGATGGGAGACCACATGGGAAAGCTAGGTTGCTGCCCGCA
409		2	44059771	44059891	plus	TGTGCCGGCAGCTAGCTCTCTGCAACTCTCACATGGTCGCCCACTGAAGCTAAGCAGGGCTGCGCCTGGTCAGTACCTGGATGGGAGACCACATGGGAAAGCTAGGTTGCTGCCTGAAGTG
410		2	44395396	44395513	minus	ATTAGCCAGCAGCTAGCTCTCTGCAACTCTCACATGGTTGTCCACTAAAGCTAAGCAAGGCTGTGCTGGTCAGTACCTGGATGAGAGACCACACGGGAAAGCTAGGTTGTTGCAGGAA
411		2	44711390	44711493	plus	ATATCACCCCTCAGTCTATGGCCGGTTACTCTCAGAAGCTAAGCAGGGCTGGGCCTGGTCAATACCTGCATGGGAGACCACATTGGAAAACTAGGTTGCTGTTG
412		2	44878665	44878788	plus	TTTTTCTGCCATGTCACCCTGCAGCCCAAGACCGGTTACTCACTGAAGCTAAGCAGGGCTGAGCCTGGTCAGTACCTTGATAGGAGACCACTAGGGAACACTAGGTTGCTGTTGGAAGTGGTGT
413		2	44919215	44919334	plus	TGCCACAGCCATGTCACCCTGCAGCCCAAGACTTACTCACTGAAGCCAAGCAGGCTGAGCCTAGTTAGTACCTGGATGGAAGACCATATGGGAAAACTAGGTTGCTGTTGGAAGTGGTGT
414		2	44993933	44994036	minus	TCACAGCCACATCACCCTGCTGCCCAAGACCAGCTACTTACTGAAGCTAAGCAGGGCTGAGCCTGGTTGGGAGACCACATGGGAATACTAGGTTGCTGTTGGAA
415		2	45002962	45003079	plus	ACACAGGCAGCTAGTTCTCTGCAACTCTCACATGGTCACCCACTGAAGCTAAACAGGGCTGTGCCTGGTCAGTACCTGGATGGGAGACCACATGGGAAAGCTAGGTTGCTGCTGGAAG
416		2	45210088	45210218	plus	AACACAATATCACAGCCATATCACCCTGAAGCCCAAGACCGGTTACTCACTGAAGCTAAGCAGGGCTGAGCCTGGTTAGTACCTAGATGGGAGACCACTAGGGAACACTAGGTTGCTGTTGGAAGTGGTGT
417		2	45220790	45220912	minus	AGCCACAGCCAAATCTCCCTGCAACCCAAGACCGGTTACTCACTGAAGCTAAACATGGCTGAGCTTTGTGAGTACCTGGATGGAAGACCACATGGGAAAACTAGGTTGCTGTTGGAAGTGGTG
418		2	45524337	45524448	minus	AATACGCCGGCAGCTAGCTCTCTGCAACTCTCGCATGGTCCCCCACTGAAGCTAAGCAGGGCTGCACCTGGATGGGAGACCACATGGGAAAGCTAGGTTGCTGCTGGAAGTG
419		2	45891865	45891981	minus	AGCCACAGCTATATCACCCTGCAGCCCAAGACCGGATACTCACTGAAGCTAAGCAGGGCTGAGACTGGTTAGTACCTGGATGGGAGAATACTTGGGAAAACTAGGTTGCTGTTGGAA
420		2	45940495	45940615	plus	TATATGTAGAGAGCATCTAGCTCTCTGCAACTATCATATGGTTGCCCATTGAAGCTAAGCAGTGCCCAGTCAGTACCTGGATGGGAGACCACATGGGAAAGCTAGGTTGCTGCTGGAAGTG
421		2	46436246	46436382	plus	CCTAACAGTTAGAAAGTTGTACTTTTGAGGTTTGAGTCCCATTACTGGCACAGATTGTTGGTGCGGGATTGACTAAGCTAAGCCTGGTCAGTGCCTGGATGGGAGACCACATGGGAAAAACTAGGTTGCTGTTGGAA
422		2	47038182	47038303	plus	TCACTGCCATATCACCTTGCAGCCCGAGACCGGTTACTCACTGAAGCTAAGCAGGGCTGAGTCTGGTCAGTACTTGGATGGGAGACCACATGAGAAAACTAGGTTGCTGTTGGAAGTAGTGT
423		2	47308510	47308613	minus	GCAGTTGGCTCTCTGCAACTCTCATATGGTCACCCACTGAAGCTAAGCAGGGCTGTGCTTGGTCAGTACCTGGAAGGGAGACCACATGGGAAAGCTGGATTGCT
424		2	47408938	47409061	minus	GGCCACATCCATATTACCCTGTAGCCGAAGACCGGTTACTCACTGAAGCTAAGCAGGGCTGAGCCTGGTCAGTACCTGGATGGGGGACCACATGGGAAAACTAGATTGCTGTTGGAGGTGGTGT
425		2	47657878	47658001	plus	TGTCACAGCCATATCACCTTGCAGCCCATTACTGGTTACTTACTGAAGCTAAGCAGGGCTGAGCCTGGTCAGTACCTATATGGGAGACCACATGGGAAAACTAGGTTGCTGTTGGAAGTGGTGT
426		2	47977410	47977524	minus	GCCGGCAGCTAGCTCTATGCAACTCTCACATGGCAGCCCATTGAAGCTAAGCAGGGCTGTGCCCGGTCAGTACCTGGTTGGGAGACCACATAGGAAAGCTAGGTTGCAGCCGGAA
427		2	47998803	47998920	minus	TACCAAAGCCATATCACTCTGCAGCCAAGACCGGTTGCTCACTGAAGCTAAGCAGGGCAGAGCCTGGTCAGTACCTGGATGGGAGACCACTTGGGAACACTAGGTTGCTGTTGGAAGT
428		2	48014747	48014864	minus	TACCAAAGCCATATCACCCTGCAGCCAAGACCGGTTGCTCACTGAAGCTAAGCAGGGCAGAGCCTGGTCAGTACCTGGATGGGAGACCACTTGGGAACACTAGGTTGCTGTTGGAAGT
429		2	48029382	48029505	minus	TAAATAGCCGGCAGCTAGCTCTCTGTAACTCTCACATGGTCGCCCACTGAAGGTAAGCAGGGCTGTGCCCGGTCAATCCCTGGATGGGAGACCACATGGGAAAGCTAGGTTGCTGCCGGAAGTG
430		2	48710848	48710971	minus	TTTCACAGCCAAATCGCACTGCAGCCCAAAAGCGGTTACTTACTGAAGCTAAGCAGGGCTGAGCCTGGTCAGTACCTGGATGGGAGACCATATGGGAAAACTAGGTTGCTGTTGGAAGTAGTGT
431		2	49012540	49012672	minus	CTAGGTGGAGCTAGCTAGCTCAGCTAGCTCTCTGCAACTCTCACATGGTTGCCCACTGAAGCTAAGCTGGGCTGCGCCCGGTCAGTACCTGGATGGGAGACCACATGGGAAAGCTAGGTTGCTGCCGGAAGTG
432		2	49424434	49424556	plus	ATTTAGCCGGCAGCTAGCTCTCTGCAACTCTCACATGGTCGCCCACTGAAGCTAAGCAGGGCTGCGCCTGGTCAGTACCTGGATGGGAGACCACATGGGAAAGCTAGGTTGCTGCCGGAAGTG
433		2	49545692	49545817	minus	TAAGCCACAGCCATGTCACCCTGCAGCCCAAGACCGGTTACTCACTGAAGCTAAGCAGGGCTGAGCCTGGTCAGTACCTGGATGGGAGACCACTAGGGAACACTAGGTTGCTGTTCGAAGTGGTGT
434		2	49612414	49612536	minus	AACACTGCCATATCACCCTGCAGCCCAAGACCGGTTACTCACTGAAGCTAAGCAGGGCTGAGCCTGGTTAGTACCTGGATGGGAGACCACTAGGGAACACTAGGTTGCTGTTGGAAGTGGTGT
435		2	49667629	49667749	plus	GGCAACAAGCCATATCACCCTGCAACCCAAGACCGGTTACTGAAGCTAAGCAGGGCTGAGCCTGGTCAGTACCTGGATGGGAGACCACTAGGGAACACTAGGTTGCTGTTGGAAGTGGTGT
436		2	50100398	50100521	plus	TGCCACAGCCATATCACCCTGCAGCCCAAGACCGGTTACTCACTGAAGCTAAGCAGGGCTGAGCCTGGTCAGTACCTGGATGGGAGACCACTAGGGAACACTGGGTTGCTGTTAGAAGTGGTGT
437		2	50203927	50204052	minus	TCAGCTGCATCGCTGGCAGCTAGCTCTCTGCAACTCTCACATGGTCGCCCACTGAAGCTAAGCAGGGCTGCGCCCGGTCAGTACCTGGATGGGAGACCACATGGGAAAGCTGGGTTGCTGCTGGAA
438		2	50321211	50321329	minus	TTGCTGGCAGCTAGCTCTCTGCAACTCTCACATGGTCGCCAACTGAAGGTAAGCAGGGCTGCGCCTGGTCAGTGCCTGGATGCAGGAGACCATCCAAAAGGCTAGGTTGCTGCCGGAAG
439		2	50717537	50717654	minus	AGCAACAGCCATATCACCCTGCAGCTTAAGACCAGTTTCTCACTGAAGCTAATCAGGGCTGAGCTTGGTCAGTATCTGGATGGGAGACAACATGGGAAAAACTAGGTTGCTGTTGGAA
440		2	50856103	50856220	plus	GCCGCAGCCATATCACCCTGCAGCCCAATATTGGTTACTTACTGAAGCTAAGCAGGGCTGAGCCTGATCAGTACCTGGATGGGAAACTACATGGAAAAGCTAGATTGCTGTTGGAAGT
441		2	50975146	50975260	minus	TCACAGCCATGTCACCCTGCAGCCCAATACTGGTTACTCACTGAAGCTAAGCAGTGCTGAGCCTGGCCAGTATCTGGATGGGAGACCACATTGGAAAACTAGGTTGTTGTTGGAA
442		2	51416651	51416775	plus	ACAGTAAAGCCATATCACCCTGCAGCCCAAGACCGATTACTCACTGAAGCTAAGCAGGGCTGAGCCTGGTCAGTACCTGGATGGGAGACCACTAGGGAACACTAGGTTGCTGTTGGAAGTGGTGT
443		2	51439614	51439732	plus	AGCCACAGCCATATCACCCTGCAGCCCAAGACCAGTTACTCACTGAAGCCAAGCAGGGCTGAGCCTGGGCAGTACCTGGATGGGAGACAACATAGAAAAACTGGGTTGCTGTTGGAAGT
444		2	51693251	51693374	minus	TGCCAAAGCAATATCGCCCTGCAGCCCAAGACCGGTTACTCACTGAAGCTAAGCATGGATGAGCCTGGTCAGTACATGGAAGGGAGACCACATGAGAAAACTAGGTTGCTGTTTGAAGTGGTGT
445		2	51723891	51724012	minus	AAACACCGGCAGCTAGCTCTCTGCAACCTTTCACATGGTTGCCCACTGAAGCTTAGCAGGGCTGTGCCCGGTCAGTACCTTAATGGGAGACCACATGGGAAAGCTAGGTTGCTGCCGGAAGT
446		2	52175857	52175982	minus	ACCACAGCCATGTCACCCTGCAGCCCAAGACTGGTTACTCACTGAAGCTAAGCAGGGCTGAGTCTGGTCAGTACCTGGATAGGAGACTACTAGGGAACACTAGGTTGCTGTTGGAAGTGGTGTTAG
447		2	52257392	52257509	minus	TCTGGCAGCTAGCTCTGCAACTGTCACATGGTCGCCTCCACTGAAGCTAAGCAGGGCTGCGCCCGGTCAGTACCTGGATGGGAGACCACATGGGAAAGCTAGGTTGCTGCCGGAAGTG
448		2	53035157	53035277	plus	CCATATGCCACAGCCATGTCACCCTGCAGCCCAAGACCGGTTACTCACTGAAGCTAAGCAGAATGTCAGTACCTGGATGGGAGACCACTAGAGAACACTAGGTTGCTGTTGGAAGTGGTGT
449		2	53075253	53075379	minus	GCATATCACCCTGCAGCCCAAGACCGGTTACTCACTAAAGCTAAGCAGGGCTGAGCCTGGTTAGTACCTGGATGAGAGACCACTAGGGAACACTAGGTTGCTGTTGGAAGTGGTGTTAGTGAGGCCA
450		2	53241289	53241414	minus	TGACACTCAGCCATGACACCCTGCAGCCCAAGACCGGTTACTCACTGAAGCTAAGCAGGGCTGAGTCTGGTCAGTACCTGGATGGGAGACCACTAGGAAACACTAGGTTGCTGTTGGAAGTGGTGT
451		2	53321912	53322020	minus	AGCTAGCTCTCTTCAACTCTCACATGGTCACCCACTAAAGCTAAGCAGGGCTGCTTCTGGTCAGTACCTGGATTGGAAACCACATGGGAAAACTAGGTTGCTGCCGGAA
452		2	53615434	53615538	plus	CCTGCATATCACCTTGCAGCTGGTTACTCAATGAAGCAAAGCAGGGCTGAGCCTGGTCAGTACCAGAATTGGACACCACATGGGAAAACTAGGTTGCTGTTGGAA
453		2	53802366	53802493	minus	TGGCCACAGCCATATCACCCTGCAGCCCAAGACTGGTTACTCACTGAAGCTAAGCAGGGCTGAGCCTGGTCAGTACCTGGATGGGAGACCACTAGGGAACACTAGGTTGCTGTTGGAAGTGGTGTTAG
454		2	54080989	54081110	minus	CAGCCACAGCCATATCACCCTGCAGCCCAGGACCGGTTACTCACTGAAGCTAAGCAGGGCTGAGCCTGGTTAGTACCTGGAATGGAGACCACTATGGAACACTAGGTTGCTGTTGGAAGTGG
455		2	54234082	54234199	plus	TTCCACAGCCATATCAGTCTACAGCCCAAGACCAGTTACTCACTGAAGCTAATCAGGGCTGAGCCTGGTCCAGTACCTGGATGGGAGACCACATTGGAAAACAAGGAAAGTGATGTAT
456		2	54598075	54598199	minus	GGTCCATATTAATACCTGCAACTCTGCAACTCCCACATGGTCACCCACTGAAGCTAAGCAGGGCTGCGCCTGGTCAGTACCTGGATGGGAGACCACATGGGAAAGCTAGGTTGCTGCCGGAAGTG
457		2	54618975	54619087	minus	CTGGCAGCTAGCTCTCTGCAACTCTCACATGGTGGCTCACTGAAGCTAAGCAGCGCTGCGCCAGGTCAGTACCTGGATGGAAGAACACATGTGAAATCAGGTTGCGGCTGGAA
458		2	54701140	54701248	plus	AGCCACAGCCATATCACCCTGTCGCCCAAGACCACTGAAGCTAAGCAGGGCTGAGCATGGTCAGTACCTGAATGGGAGACCACATGGGAAAACTTGGTTACTGTTGGAA
459		2	54994367	54994487	minus	CTGAACTGCTGAAACATATTTAATACTTAATATAAAAGGCTGAAAGACTGAAGCTAAGCAGGGCTGCGCCCGTTCAGTTCCTGGATGGGAGACCACATGGGAAAGCTAGGTTGCTGCCGGA
460		2	55040679	55040799	plus	GGCCACAGCCATATCACCCTGCAGCCCAAGACCGGTTACTCACTGAAGCTAAGCAGGGCTGAGTCTGGTCAGTACCTAGATGGGAGACCACATGAAAAAAACTAGGTTGCTGTTGCAAGTG
461		2	55068271	55068399	plus	AATATATGTTAGCCGGCAGCTAGCTCTCTGCAACTCTCACATGGTCGCCCACTGAAGCTAAGCAGGGCTGCGCCCGGTCAGTACCTGGATGGGAGACCACATGGGAAAGCTAGGTTGCTGCCGGAAGTG
462		2	55271723	55271841	minus	TTTTGCCGGCAGCTAGCTCTCTGCAACTCTCACATGGTCGCCCACTGAAGCTAAGCAGGGCTGCGCCCGGTCAGTACCTGGATGGGAGACCACATGGGAAAGCTAGGTTGCTGCAGGAA
463		2	55400165	55400275	minus	CTTGGCTCTCTGCAACTCCAACATGGTCACCCACTGAAGCTAAGCAGGGCTGCGCCTGGTCAGTACTTGGATGGGAGACCACATGGGATAGCTAGGTTGCTGCCGGAAGTG
464		2	55504093	55504217	minus	CCACGAAGCCGGCAGCTAGCTCTCTGCAACTCCCACATGGTCGCCCTCTAAAGCTAAGCAGGGCTGCGCCTGGTCAGTACCTGGATGTGAGACCACATGGGAAACCTAGGTTACTGCCGGAAGTG
465		2	55699079	55699204	minus	ACAGGCATAGCCGCATCACCCTGCAGCACAAGATTGGTTACTGATTGAAGCTAAGCATGGCTGAGCCTGGTCAGTACCTGGATGGGAGACCACATGGGAAAACTTGGTTGCTGTTGGAAGGGGTGT
466		2	55729286	55729389	plus	AGCTCTCTGCAACTCTCACATGGTTGCCCACTGAAGTTATCAGGGTTGCGCCCGGTCAGAACCTGGATTGGAGACCACATGGGAAAGCTAAGTTGTTGCTAGAA
467		2	55756471	55756582	plus	GCAGCTAACTCTGCAACTCTCCCATGGTCGCTCACTGAAGCTAAGCAGGGCTGCGCCTGTTCAGTACCTCGATGGGAGAGCACATGAGAAAGCTAGGTTGCTGCCGGAAGTG
468		2	55918667	55918785	minus	CCCGGGTTGGCCATATCACCCTGCAGCCCAACACTGATTACTCACTACAGCTAAGCAGGGCTGAGCCTGGTCAGAATGTGTATGGGAAACCACCTGGGAAAGCTCGGTTGCTGCCGGAA
469		2	55980692	55980803	minus	TCGCCCAACAGCTAGCTCTCTGCAACTCTCACATGGTCTCCCGCTGAAGCTAAGCAGGGCTGGTCAGTACCTGGATGGGAGACCACATGGGAAACTTAGGTTGCTGCTGGAA
470		2	56175096	56175219	plus	TGCCACAGCCACATCACCCTGCAGCCCAAGACCGGTTACTCACTGAAGCTAAGCGGGGCTGAGCCTGGTCAGTACCTGGATGGGAGGCCACTAGGGAACACTAGGTTGCTGTTGGAAGTGGTGT
471		2	56227234	56227363	plus	CTAAATAAATACCTCTGCAGCTAGCTCTCTGCAACTCTCACATGGTCGCCCACTGAAGCAAAGCAGGGCTGTGCCCGGTCAGTACCTGGATGGGAGACCACATGGGAAAGCTAGGTTGCTGCCGGAAGTG
472		2	56271019	56271141	minus	TGTACAGCCATATCACCCTGCAGCTCAAGACCGGTTACTCACTGAAGCTAAGCAGGGCTGAGCCTGGTCAGTACCTGGATGGGAGACCACTTGGGAACACTAGGTTGCTGTTGGAAGTGGTGT
473		2	56440214	56440333	minus	CACAGCCATATCCGCTGCAGCCCAAGACCAGTTACTCACTGAAGTTAAGCAGGGCTGAGCCTGGTCAGTACCTGGATGGGAGAACACTAGGGAACACTAGGTTGCTGTTGGAAGTGGTGT
474		2	57083494	57083616	plus	TTTGCCTGGCAGCTAGCTCTCTGCAACTCTCACATGGTGGTCCACTGAAGCTAAGCAGGGCTGTGCCCGGTCAGTACCTGGATGGGAAACCACAAGGGAAAGCTACTGGAAGTGATGTCAGTG
475		2	57092563	57092678	plus	CACATCCATATCACCCTGCAGCCTAAGACTGGTTACTCACTGAAGCTAAGCAGGGCTGAGCCTGGTCAGTACCTGGATGGGAGACCACTTGGGTCTCTGTTGTTGCTGTTGGAAGT
476		2	57106866	57106988	plus	GTCACAGCCATATCACCCTGCAGCCCAAGACCGGTTACTCACTGAAGCTAAGCAGGGCTGCGCCTGGTCAGTACCTGGATGGGAGACCACAAGGGAACACTAGGTTGCTGTTGGAAGTGGTGT
477		2	57465406	57465521	plus	CATTTATATCACCTGCAGCCCAAGACTGGTTACTCACTGAAGCTAAGCAGGTCTGAGCCTGGTCAGTACCTGGATGGGAGACCACATGGGAACACTAGGTTGCTGTTGGAAGTGGT
478		2	57681965	57682088	minus	CGCCACAGCCATGTCACCCTGCAGCCCAAGACCGGTTACTCACTGAAGCTAAGCAGGGCTGAGCCTGGTCAGTACCTGGATGGGAGACCACTAGGGAACACTAGGTTGCTGTTGGAAGTGGTGT
479		2	57689742	57689863	minus	AATTGCCGGCAGTTAGCTTTCTGGAACTCTCACATGGTCGTCCACTGAAGCTATGCAGGGCTTCGCCCGGTCAGTACCTGGATGGGAGACCACATGGGAAAGCTAGGTTCCTGCTGGAAGTG
480		2	58019495	58019596	plus	CCACCGCCATATCACACTGCAGCGCAGGCGCGGTTACTCACTGAACCTAAGCAGGGCTGGGCCTGGTCAGTGCCTGGATGGGAGACCAGATGGGAAAACTAA
481		2	58020821	58020947	plus	TTCTACCGCAGCCATATCACCCTGCAGCCCAAGAGCGGTTACTCACTGAAGCTAAGCAGGGCTGAGCCTGGTCAGTGCCTGGATGGGAGACCACTAGGGAACACTAGGTTGCTGTTGGCAGTGGTGT
482		2	58167169	58167280	minus	CACCACAGCCATATCACCCTGCAGCCCAAGAGCGGGTACTCACTGAAGCTAAGCAGAGCTGGTCAGCACCTGTATGGAAGACCACATGTGAGAACTAGGCTGCTGTTGGAAG
483		2	58299492	58299603	plus	CACCACAGCCATATCACCCTGCAGCCCAAGAGCGGGTACTCACTGAAGCTAAGCAGAGCTGGTCAGCACCTGTATGGAAGACCACATGTGAGAACTAGGCTGCTGTTGGAAG
484		2	58488247	58488360	minus	ATATGCACAATCAGCCCAAGACCGGTTACTCACTGAAGCTAAGCAGGGCTGAGCCTGGTCAGTACCTGGATGGGAGACCACTAGGGAACACTAGGTTGCTGTTGGAAGTGGTGT
485		2	58940894	58941011	minus	TGCCACAGCCATATCACCCTGCAGCCCAAGAGCGCTCCCTCACTGAAGCTAAGCAGGGCTGGACCTGATCAGTGTCTGCATGGGAGACCACATGGGAACACTAGGCTGCTGTTGGCAG
486		2	59398029	59398144	plus	CTAGCTGGCAGCTAGCTCTCTGCAACTCTCACATGGTCGCCCACTGAAGCTAAGCAGGGCTGCGCCCGGTCAGTACCTGGATGGGAGACATGGGAAAGCTAGGTTGCTGCCGGAAG
487		2	59403818	59403943	plus	TTGGCCACAGCCATGTCACCCTGCAGCCCAAGACCGGTTACTCACTGAAGCTAAGCAGGGCTGAGCCTGGTTAGTACCTGGATGGGAGACCGCTAGGGAACACTAGGTTGCTGTTGGAAGTGGTGT
488		2	59523039	59523152	minus	TCTGCTGGCAGCTAGCTCTCTGCAACTCTCACATCACTGAAGCTAAGCAGGGCTTCGCCTGGTCAGTACCTGGATGGGAGACCACATGGGAAAGCTAGGTTGCTGCTGAAAGTG
489		3	540008	540124	plus	ATGCTGGCAGCTAGCTATCTGTAACTCTCACATGGTCGCCCACTGAAGCTAAGCAGGGCTGCGCCTGTTCAGTACCTGGATGGGAGACCACATGGGAAAGCTAGGTTGCTGCCGGAA
490		3	576168	576288	minus	CCTAAAAGCTCCATATTAATACCTCAGGTACAAGACCGGTTACTCACTAAAGCTAAGCAGGGCTGAGCCTGGTCAGTACCTGGATGGGAGACCACTAGGGAACACTAGGTTGCTGTTGGAA
491		3	687017	687119	minus	AGGCGGCAGCTAACTCTCTGCAACTCTCACATGGCACACTGAAGCTACACCCGCTCAGTACCTGGATGGGAGACCACATGGGAAAACTAGGTTGCTGCCGGAA
492		3	797829	797952	plus	TGCCACAGCCATATCACCCTGCAGCCCAAGACCGGTTACTCACTAAAGCTAAGCAGGGCTGAGCCTGGTTAGTACCTGGATGGGAGACCACTAGGGAACACTAGGTTGCTGTTGGAAGTGGTGT
493		3	812344	812467	plus	TGCCACAGCCATATCACCCTGCAGCCCAAGACCGGTTACTCACTAAAGCTAAGCAGGGCTGAGCCTGGTCAGTACCTGGATGGGAGACCACTAGGGAACACTAGGTTGCTGTTGGAAGTGGTGT
494		3	1032934	1033049	minus	ACTTCAGCTAGCTCTCTGCAACTCTCACATGGTTGCCCACTGAAGCTAAGCAGGGCTGCGCCTGGTCAGTACCTGGATGGGAGACCACATGGGAAAGCTAGGTTGCTGCCGGAAGT
495		3	1037297	1037414	minus	ATGCCGGCAGCTAGCTCTCTGCAACTCTCACATGGTCACCCACTGAAGCTAAGCAGGGCTGCGCCTGATTAGTACCTGGATGGGTGACCACATGGGAAAGCTAGGTTGCTGCCGGAAG
496		3	1187565	1187681	plus	TTGCCGGCAGCTAGCTCTCTGCAGCTCTCACATGGTCGCCCACTGAAGCTGAGCAGGGCTGTGCATGATTAGTACCTTGATGGGAGACCACATGGGAAAGCTAGGTTGCTGTTGGCA
497		3	1238802	1238925	plus	GAAACATATCATGTCACCCTGCAGCCCAAGACCGGTTACTCACTGAAGCTAAGCAGGGCTGAGCCTGGTCAGTACCTCAATGGGAGACCAGTAGGGAAAACTAGGTTGCTGTTGGAAGTGGTGT
498		3	1564134	1564247	minus	TACAGCCACATCACCCTGCAGCCCAAGAGCGGTTACTCACTGAAGCTGAGCAGGGCTGAGCCTGGTCACTATCTAGATGGGAGACCACATGGGAACACTAGGTTGCTGTTGGAA
499		3	1594286	1594403	plus	TACCACAGTCACATCACCCTGCAGCCCAAGAGCGGTTACTCACTGAAGCTGAGCAGGGCTGAGGCTGGTCAGTGTCTGGATGGGAGAGCACATGGGAACACTAGGTTGCTGTTGGCAG
500		3	1710851	1710972	plus	TGTTGCCGGTAGCTAGCTCTCTGCCACTCTCACATGGTTGCCCAATAAAGCTAAGCAGGGCTGCGGCCGGTCAGTACCTGGATGGGAGACCACATGGGAAAGCTAGGTTGCTGCTGGAAGTG
501		3	1857749	1857871	minus	CTAGCTAGTCGGCAGCTAGCTCTCTGCAACTCTCACATGGTCGCCAAGTGAAGCTAAGCAGAGCTGCACCTGCTCAGTACCTGGATGGGAGACCACATGGGAAAGTTAGGTTGCTGCCGGAAG
502		3	2052008	2052131	plus	GTTGTTGCTGGCAGCTAGCTATCTGCAACTCTCACATGGTCGCCCACTGAAGCTAAGCAGGGCTGCGCCCGGTCAGTACCTGGATGGGAGACCACATGGGAAAGCTAGGTTCCTGCCGGAAGTG
503		3	2090927	2091048	plus	TGTTGCCGGTAGCTAGCTCTCTGCCACTCTCACATGGTTGCCCAATAAAGCTAAGCAGGGCTGCGGCCGGTCAGTACCTGGATGGGAGACCACATGGGAAAGCTAGGTTGCTGCTGGAAGTG
504		3	2331327	2331448	plus	TGTTGCCGGCAGCTAGCTCTCTGCCACTCTCACATGGTTGCCCACTAAAGCTAAGCAGGGCTGCGGCCGGTCAGTACCTGGATGGGAGACCACATGGGAAAGCTAGGTTGCTGCTGGAAGTG
505		3	2371428	2371552	minus	CTAGCTAGCTGGCAGCTAGCTCTCTGCAACTCTCACATGGTCGCCAAGTGAAGCTAAGCAGAGCTGCACCTGCTTAGTTCCTGGATGGGAGACCACATGGGAAAGCTAGGTTGCTGCCGGAAGTG
506		3	2634243	2634371	minus	TCAACTGCCATAGCCATGTCACCCTGCAGCTCAAGATCGGTTACTCACTGAAGCTAAGCAGGGCTGAGCCTGGTCAGTACCTGGATGGGAGACCACATATTAAAACTAAGTTGCTGTTGGAAGTGGTGT
507		3	2740886	2741009	minus	ATACACAGCCATGTCACCCTGCAGCCCAAGACCGGTTACTCACTGAAGCTAAGCAGGGCTGAGCCTGGTCAGTACCTGGATGAGAGACCACTAGGGAACACTGGGTTGCTGTTGGAAGTGGTGT
508		3	2923996	2924124	minus	TCAACTGCCAAAGCCATATTACCCTGCAGCTCAAGAGCGGTTACTCATTGAAGTTAAGCAGGGCTGAGCCTGGTCAGTACCTGGATGGGAGACCACAGGGGAAAACTAGGTTTCTGTTGAAAGTGGTGT
509		3	2960924	2961047	plus	TGCCACAGCCATATCACCCTGCAGCCCAAGACCGGTTACTCACTGTAGCTAAGCAGGGCTGAGCCTGGCCAGTACCTGGATGGGAGACCACTAGGGAACGTTAGGTTGTTGTTGGAAGTGGTGT
510		3	2992219	2992323	minus	TGCAGCTCAAGACCGGTTACTCACTGAAGCTAAGCAGGGCTGGGCCTGGTCAGTACATGGATGAGAGACCTTGTGGGAAAACTAAGTTGCTGTCGGAAGTGGTGT
511		3	3104480	3104604	minus	TTCCCACAGCCATGTCACCCTGCAGCCCAAGACCGGTTACTCACTGAAGCTAAGCAGGGCTGAGCCTGGTCAGTACCTGGATGGGAGACCACTAGGGAACACTAGGTTGCTGTTGGAAGTGGTGT
512		3	3232700	3232823	minus	TGCCATAGCCATATTACCCTGCAGCTCAAGAGCGGTTACTCACTGAAGCTAAGCAGGGCTGAGCCTGGTCAGTATCTGGATGGGAGACCACATAGGAAAACTAAGTTGCTGTTGCAAGTGGTGT
513		3	3321636	3321756	minus	AAACACAGCCATATCACCCTGCCCAAAACCACTTACTTACTGAAGCTAAGCAGGGCTGAGCCTGGTCAGTACCTGGATGGGAGACCACATGGAAATTCTAGGCTGCTGTTGGAAGTGGTGT
514		3	3349077	3349201	plus	TAGCCACAGCCATGTCACCCTGCAGCCCAAGACCGGTTACTCACTGAAGCTAAGCAGGGCTGAGCCTGGTCAGTTCCTGGATGGGAGACCACTAGGGAACACTAGGTTGCTGTTGGAAGTGGTGT
515		3	3433893	3434013	minus	AAACACAACCATATCACCCTGCCCAAAACCACTTACTTACTGAAGCTAAGCAGGGCTGAGCCTGGTCAGTACCTGGATGGGAGACCACATGGAAAAACTAGGCTGCTGTTGGAAGTGGTGT
516		3	3467549	3467673	plus	TAGCCACAGCCATGTCACCCTGCAGCCCAAGACCGGTTACTCACTGAAGCTAAGCAGGGCTGAGCCTGGTCAGTTCCTGGATGGGAGACCACTAGGGAACACTAGGTTGCTGTTGGAAGTGGTGT
517		3	3600837	3600954	minus	AGCCACAGCCATGTCACCCTGCAGCTTAAGACCAGTTACTCACCGAAGTTAAGCAGGGCTGAAGCCTGGTCAGTGCCTGGATAGGAGACAGCATGGGAAAACGAGGTTGCTGTTGACA
518		3	4277283	4277407	minus	TAGCCACAGCCATGTCACCCTGCAGCCCAAGACCGGTTACTTACTGAAGCTAAGCAGGGCTGAGCCTGGTCAGTACCTGGATGGGAGACTACTAGGGAACACTAGGTTGCTGTTGGAAGTTGTGT
519		3	4562635	4562758	minus	TGCCACAGCCATGTCACCCTGCAGCCCAAGACCGGTTACTCACTGAAGCTAAGCAGGGCTGAGCCTGGTCAGTACCTGGATGGGAGACTACTAGGGAACACTAGGTTGCTGTTGGAAGTGGTGT
520		3	4598317	4598432	plus	GTCGGCTCCTAGCTCTCTGCAGCTCTCACATGGTCGCCCACTGAAGCTAAGCAGGGCTGCACCTGGTCAGTACCTGGATGGGAGACCACATGGGAAAGCTAGGTTGCTGCTGGAAA
521		3	4599253	4599368	minus	AGGCAGCTAGCTCTCTGCAGCTCTCACATTGTCGCCCAAAAAAGCTAAGCAGGGCTGCGCCTGGTCAGTACCTGGATGGGAGACCACATGGGAAAGTTAGGTTGCTGATGGAAGTG
522		3	4698393	4698510	plus	ACCGGCAGCTAGCTCTCTGCAACTCTCACATGGTCGCCCACTGAAGCTAAGCAGGGCTGCGCCTGGTCAGTACCTGGATGGGAGACCACATGGGAAAGCTAGGTTGCTGCCGGAAGTG
523		3	4758747	4758849	plus	CATAGCTGGCAGCTAGCTTTCTGCAAGTCGCTCACTGAAGCTAAGCAGGGCTGAGCCTGGTCAGTACCTGGATGGGAGACCACATGGGAAAGTTAGGTTGCTG
524		3	5193491	5193608	plus	ACAGCCAGCAGCTAGCTCTCTGCAACTTTCACATGGTTGCCCACTGAAGCTAAGCAGGGCTGCGCCCGGTCAGTACCTGGATGGGAGACCACATGGGAACACTAGGTTGCTGCCGGAA
525		3	5416219	5416340	minus	TCTGTTAGAAATCTCCATTTTGAATGTTCAGACCCAGTGGTCGCCCACTGAAGCTAAGCAGGGCTGCGCCTGGTCAGTACCTGGATGGGAGACCACATGGGAAAGCTAGGTTGCTGCCGGAA
526		3	5427167	5427293	minus	CCATTTCACAGCCATGTCACCCTGCAGCCCAAGACCGGTTACTCACTGAAGCTAAGCAGGGCTGAGCCTGGTCAGTACCTGGATGGGAGACCACTAGGGAACACTAGGTTGCTGTTGGAAGTGGTGT
527		3	5603976	5604099	minus	TGCCACAGCCATGTCACCCTGCAGCCCAGGACCGGTTACTCACTGAAGCTAAGCAGGGCTGAGCCTGGTCTGTACCTGGATGGGAGACCACTAGGGAACACTAGGTTGCTGTTGGAAGTAGTGT
528		3	5787688	5787811	minus	CCCGATATAAGCCCTGGCTCGCACTGGCCTGATAGTGGAAATGCGGCTACTGAAGCTAAGCAGGGCTGAGCCTGGTCAGTACCTGGATGGGAGACCACTAGGGAACACTAGGTTGCTGTTGGAA
529		3	5915904	5916009	plus	ACTAGCTCTCTGCAACTCACATGGTCGCCCACTGAAGCCAAGCAGGGTTGCGCCCGGTGAGTACCTGAATGGGAGACCACATGAGGAAGCTAGGTTGCTGCCGGAA
530		3	5936837	5936956	plus	TGGCCGGCAGCTAGCTCTCTGCAACTCTCACATGGTCGCCCACTAAAGCTAAGCAGGGCTGCACCTGGTCAGTACCTAGATGGGAGACCACATGGGAAAGCTAGGTTGCTGCCGGAAGTG
531		3	6235806	6235932	minus	TGCCACAGCCATATCACCCTGCAGCCCAAGACTGATTACTCACTGAAGCAAAGCAGGGCTGAGCCTGGTCAGTACCTGGATGGGAGACCACATGGGAAAACTAGGTTGCTGTTGGAAGTGGTGTTAG
532		3	6278182	6278299	plus	AAAGATGGCAGCTTGCTCTCTGCACCACTCACATGGTCACCCACTGAAGCTAAGCAGGGCTGCACCCAGTCAGTACCTGGATTAGAGACCGCATGAGTAAGCTAGGTTGCTGTCGGAA
533		3	6332906	6333032	minus	ACAGGCCACAGCCATGTCACCCTGCAGCCCAAGACCGGTTACTCACTGAAGCTAAGCAGGGCTGAGCCTGGTCAGTACCTGGATGGGAGACCACTAGGGAACACTAGGTTGCTGTTGGAAGTGGTGT
534		3	6535469	6535584	plus	AGCCGGCAGCTAGCTCTCTTCAACTCTCACATGTTCGCCCACTGAAGCTAAGCAGGGCTGCACCTGGGTAGTACCTGGATGGGAGACCACATGAGAAAGCTAGTTTGCTGCCGGAA
535		3	6546893	6547015	minus	AACACAGCCATGTCACCCTGCAGCCCAAGACCGGTTACTCACTGAAGCTAAGCAGGGCTGAGCCTGGTTAGTACCTGGATGGGAGACCACTAGGGAACACTAGGTTGCTGTTGGAAGTGGTGT
536		3	6601055	6601178	plus	ATATACAGTCATATCATCCTGCAGCCCAAGACCGGTTACTCACTGAAGCTAAGCAGGGCTGAGCCTGGTTAGTACCTGGATGGGAGACCGCTAGGGAACACTAGGTTGCTGTTGGAAGTGGTGT
537		3	6607623	6607747	plus	TCTTCTAGCCGGCAGCTAGCTCTCTGCAACTCTCACATGGTCGCCCACTGAAGCTAAGCAGGGCTGCGCCCGGTCAGTACCTGGATGGGAGACCACATGGGAAAGCTAGGTTGCTGCCGGAAGTG
538		3	6678351	6678473	plus	ATTTAGCCGGCAGGTAGTTCTCTGCAACTCTCACATGGTCGCCCACTGAAGCTAAGTAGGGCTGCGCCCGTTCGGTACCTGGATGCAAGACCACATGGGAAAGCTAGGTTGCTGCCGGAAGTG
539		3	6746301	6746425	plus	TAGCCACAGCCATGTCACCCTGCAGCCCAAGACCGGTTACTCACTGAAGCTAAGCAGGGCTGAGCCTGGTCAGTACCTGGATGGGAGACCGCTAGGGAACACTAGGTTGCTGTTCGAAGTGGTGT
540		3	6928178	6928297	minus	TATTAGCCGGCAGCTAGCTCTCTGCAGCTCTCACATGGTCGCCCACTGAAGCTAAGCAGGGCTGCGCCCGGTCAGTACCTGGATGGGAGACCACTTGGGAAAGCTGGGTTGCTGCCGGAA
541		3	7462877	7462998	minus	CACAGCCATGTCACCCTGCAGCCCAAGACCGGTTACTCAATGAAGCTAAGCAGGGCTGAGCCTGGTCAGTTCCTTGATGGGGGAACACTAGGTTGCTGTTGGAAGTGGTGTTAGTGAGGCCA
542		3	7777438	7777555	minus	TAGCCGGCAGCTAGCTCTCTGCAACTCTCACATGGTCGCCCACTGAAGCTAAGCAGGGCTGCGCCCGGTCAGAACCTGGACAGGAAGCCATATGGGAACGCTAGGTTGCTGTCGGAAG
543		3	8025373	8025479	minus	TTTCGCCGGCAGCTAGCTCTCTACAACATGGTCACCCACTGAAGCTAAGCAGGGCTACGCCTGGTCAGTACCTAGATGGGAGACCACATGGGAAAGCTGGGTTGCTG
544		3	8057114	8057238	minus	AGTCTCCAGCCATATCACCCTGCAGCCCAAGACCGGTTACTCACTGAAGCTAAGCAGGGCTGAGCCTGGTTAGTACCTGGATGAGAGACCACTAGGGAACACCAGGTTGCTGGTGGAAGTGGTGT
545		3	8384726	8384827	minus	GCCATATCACCCAAGACCGGTTACTCACTAAAACTAAACAGGGCTGAGCCTGGTCAGTACCTGTATGGGAGACCACTTGGGAAAACTAGGTTTCTGTTGGAA
546		3	8511812	8511936	plus	TCACCACAGCCATGTCACCCTGCAGCCCAAGACCGGTTACTCACTGAAGCTAAGCAGGGCTGAGCCTGGTCAGTACCTGGATGGGAGACCACTAGGGAACGCTAGCTTGCTGTTGGAAGTGGTGT
547		3	8536910	8537034	minus	TCTCCACAGCCATATCACCCTGCAGCCCAAGACCGGTTACTCACTGAAGCTAAGCAGGGCTGAGCCTGGTCAGTACCTGGATGGGAGACCACTAGGGAACACTAGGTTGCTGTTGGAAGTGGTGT
548		3	8560245	8560369	plus	AATATTAGCCGGCAGCTAGTTCTCTGCAACTCTCACATGGTCGCCCACTGAAGCTAAGCAGGGCTGCGCCTGGTCAGTACCTGGATGGGAGACCATATAGGAAAGCTAGGTTGCTGCCGGAAGTG
549		3	8860388	8860508	minus	CACAGCCATATCACTCTGCAGCCCAAGACCGGTTACTCACTGAAGCTAAGCAGGGCTAAGCCTGGCCAGTACCTGGATGGGAGACCACTAGGGAACACTAGGTTGCTGTTGGAAGTGGTGT
550		3	9063107	9063225	plus	GCTTATGGCCATACCACCCTGGCAATGCCAAATCTCATCTGAACTCGGAAGTAAAGCAGGGTCGGGCCTGGTTAGTACTTGTATGGTAGACCGCCTGGCAATACCAGGTGCTGTAAGCT
551		3	9626504	9626620	minus	TTTCTACAGCCATATCACTCTGCAGCCCAAGACTAGTTACTGATGCTAAGCAGGGCTGAGCCTGGTCAGTACCTGGATGGGAGAACACATGGGGAAAAACTAGGTTGTTGTTGGAAA
552		3	9944555	9944672	minus	TTAGGCGGCAGCTAGCTCTCTGCAATTCTCACATGGTCGCCCACTTAAGCTAAGCAGGGCTGTGCCCAGTCAGTACCTGGATGAGAGATCACATGGGAAAGCTAGGCTGCTGCCAGAA
553		3	10008273	10008396	minus	CCATACAGCCATATCACCCTGCAGCCCAAGACCGGTTACTCACTGAAGCTAAGCAGGGCTGAGCCTGGTCAGTACCTGGATGGGAGACCACTAGGGAACACTAGGTTGCTGTTGGAAGTGGTGT
554		3	10009090	10009218	plus	GCCACAGCCACAGCCATGTCACCCTGCAGCCCAAGACCGGTTACTCACTGAAGCTAAGCAGGGCTGAGCCTGGTCAGTACCTGGATGGGAGACCACTAGGGAACACTAGCTTGCTGTTGGAAGTGGTGT
555		3	10217722	10217857	minus	TTCATTCTAAAATGCCGTTTTAAAACTAAAACGCACTAGTGTAAACGGGGCCAAAGTAACCGGCTGAAGCTAAGCAGGGCTGCGCCCGTTAAGTAACTGAATGGGAGACCACATGGGAAATGAGTGGTGTTAGTGA
556		3	10243785	10243909	minus	TTCATTTGCCTCTATCATATCACCCTGTAGCCCAAGACTGGTTACTCACTGAAGCTAAGCAGGGCTGAGCGTGGTCAGTACCTGGATTGGAGACCACTTTGGAAAATTAGGTTGCTATTGAAAGT
557		3	10512004	10512129	plus	TCATGCCCAGCCATGTCACCCTGCAGCCCAAGACCGGTTACTCACTGAAGCTAAGCAGGGCTGAGCCTGGTCAGTACCTGGATGGGAGACCACTAGGGAACACTAGGTTGCTGTTGGAAGTGGTGT
558		3	10720049	10720171	minus	TCCACAGCCATATCACCCAGCAGCCCAAGACCGGTTACTCACTGAAGCTAAGCAGGGCTGAGCCTGGTTAGTACCTGGATGGGAGACCACTAGGGAACACCAGGTTGCTGTTGGAAGTGGTGT
559		3	10720971	10721075	minus	AACCCTGCAGCCTAATACCGGTTACTCGCTGAAGCTAAGCAGGGCTGAGCCTGGTCAATACCTGGATGGGAGACCACATGTTAAAACTAGGTTGCTGTTAGAAGT
560		3	10757707	10757828	minus	ACTCGCCGGCAGCTAGCTCTCTGTAACTCTCACATGGTCGCCCACTGAAGCTAAGCAGGGCTGCGCCCGGTCATTACCTGGATGGGAGACCACATGGGAAAGCTAGGTTGCTACCGGAAGTG
561		3	10969763	10969886	plus	TGCCCCAGCCATATCACCCTGCAGCCCAAGACCGGTTACTCACGAAAGCTAAGCAGGGCTGAGCCTGGTCAGTACCTGAATGGGAGACCATGTGGGAAAACTAGGTTGTTGTTGGAAGTGGTGT
562		3	11387032	11387151	minus	TTGCCGGCAGCTAGCTCTCTGCAACTTTCACATGGTTGCCCACTGAAGCTAAGCAGGGCTGCGCCCGGTCAGTACCTGGATGGGAGACCACATGGGAAAGCTAGGTTGCTACCGGAAGTG
563		3	11521565	11521695	plus	TTTGAGCCACAGCCATGTCACCCTGCAGCCCAAGACTGGTTACTCACTGAAGCTAAGCAGGGCTGAGCCTGGTTAGTACCTGGATGGGAGACCACTAGGGAACACTAGGTTGCTGTTGGAAGTGGTGTTAG
564		3	11525728	11525838	minus	TGCTAGCTAGCTCTCTGCAACTCTCACATGGTCGCCCACTAAAGCTAAGCAGGGCTACGCCTGGTCAGTGGCTGGATGGGAGACCACATGGGAAAGCCAGGTTGCTGCCGG
565		3	11530515	11530639	plus	TGCCACAGCCATGTCACCCTGCAGCCCAAGACCGGTTACTCACTGAAGCTAAGCAGGGCCTGAGCCTGGTCGGTACCTGGATGGGAGACCACTAGGGAACACTAGGTTGCTGTTGGAAGTGGTGT
566		3	11865908	11866029	plus	TAACAATGCTGGCAGCTAGCTCTCTGCGACTCTCACATGGTCACCCACTGAAGCTAAGCAGGGCTGCAACTGGTCAGTACCTGGATGTGAGACCACATTGGACAGCTAGGCTGCTGCTGGAA
567		3	12082554	12082678	minus	TGGCCACAGCCATGTCACCCTGCAGCCCAAGACCGGTTACTCACTGAAGCTAAGCAGGGCTGAGCCTGGTCAGTACCTGGATGGGAGACCACTAGGGAACACTAGGTTGCTGTTGGAAGTGGTGT
568		3	12082830	12082936	minus	TGGCCACAGCCATGTCACCCTGCAGCCCAAGACCGGTTACTCACTGAAGCTAAGCAGGGCTGAGCCTGGTCAGTACCTGGATGGGAGACCACTAGGGAACACTAGGT
569		3	12222688	12222810	minus	GTCAAAGACATGTCACCCTGCAGCCCAAGACCGGTTACTCACTGAAGCTAAGCAGGGCTGAGCCTGGTTAGTACCTGGATGGGAGACCACTAGGGAACACTAGATTGCTGTTGGAAGTGGTGT
570		3	12517098	12517219	plus	CATTGCCGGCAGCTAGCTCTCTGCAACTCTCACATGGTCGCCCACTGAAGCTAAGCAGGGCTGCGCCCGGTCAGTACCTGGATGGGAGACCACATGGGAAAGCTAGGTTGCTGCCGGAAGTG
571		3	12565137	12565258	plus	CATCGCCGGCAGCTAGCTCTCTGCAACTCTCACATGGTCGACCTCTGAAGCTAAGCAGGGCTGCGCCCGGTGAGCACCTGAATGGGAGACCACATGGGAAAGCTAGGTTGCTGCCGGAAGTG
572		3	12619329	12619446	plus	TTTAGCCGACAGCTAGCTCTCATCAACTCTCACATGGTCGCCCACTGAAGCTAAGCAGGGCTGCGCCTGGTCAGTACCTGCATGGGAGACCACATGGGAAAGCAAGGTTGCTGCCGGA
573		3	12716947	12717080	minus	GGCCACAGCCATGTCACCCTGCAGCCCAAGACCGGTTACTCACTGAAGCCAAGCAGGGCTGAGCCTGTTCAGTACCTGGATGGAGACCACTAGGGAACACTAGGTTGCTGTTGGAAGTGGTGTTAGTGAGGCCA
574		3	12898452	12898575	minus	TGCCACAGCCATATCACCCTGCAGCCCAAGACTGGTTACTCACTGAAGCTAAGCAGGGCTGAGCCTGGTCAGTACCTAGATGGGAGACCACATGGCAAAACTAGGTTGGTGTTGGAAGTGGTGT
575		3	13120726	13120838	minus	CACAGCCATATCACCCTGCGGCCCAAGAGCAGTTATTCACTGAAGCTAAGCAGGGCTGAGCCTGGATGCAAGACCACATGGGAAAACTAGGTTACTGTTGGAAATGGTGTTAG
576		3	13494008	13494119	minus	GCAGCTAGCTCTCTGTAACTCTCACACGGTCGCCCACTGAAGCTAAGCAGGGCTGTGCCTGGTCAGTACCTGGATGGGAGACCACATAGGAAAACTAGGTTGTTGACGGAAA
577		3	13545944	13546057	minus	GCCGGCAGCTCTCTGCAACTCTCACATGGTCACCCACTGAAGCTAAGCAGGGCTGCGCCTGGTCAGTACCTGATTGGGAGACCACATGGGAAAGCTAGGTTGCTGCCGGAAGTG
578		3	13557392	13557506	plus	ACATGCTAGCTCTCTGCAACTCTCACATGGTCAGCCACTGAAGCTAAGCAGGGCTGCGCCTGGTCACTACCTAGATGGGAGACCACATGGGAAAGCTAGGTTGCTGCCGGAAGTG
579		3	13619472	13619596	minus	TAGCCACAGCCATGTCACCCTGCAGCCCAAGACCGGTTACTCACTGAAGCTAAGCAGGGCTGAGCCTGGTTAGTACCTGGATGGGAGACCACTAGGGAACACTAGGTTGCTGTTGAAAGTGGTGT
580		3	14094820	14094938	plus	TCTGCCCTTCATCTCACAGCTCAGGTAAGACAATCTACTGCAACATCATTAAGCAGGGCTGAGCCTGGTCAGTACCTGGATGGGAGACCACACGGGTAAAAACAAGGTTAATGTTGGAA
581		3	14157780	14157902	plus	CTATGGCCGGCAGCGAGCTCTCTGCAACTCTCACATGGTTGCCCACTGAAGCTAAGCAGGGCTGTGCCCGGTCAGTACCTGGATGGGAGACCACATGGGAAAGCTAGGTTGCTGCCGGAAGTG
582		3	14539542	14539665	minus	GGCCACAGCCACATCACCCTGCAGCCCAAGACCGGTTACTCCCTGAAGCTAAGCAGGGCTGAGCCTGGTCAGTACCTGGCTGGGAGACCACTAGGGAACACTAGGTTGCTGTTGAAAGTGGTGT
583		3	14738255	14738360	minus	CCACATCACCCTGCAGCCCAAGACTAGTTACTCATTGAAGCTAAGCAGGGCTGAACCTGGTCAGTACCTGAATAGGAGTCCATATGGGAAAACTAGCTTGCTGTTG
584		3	15534796	15534899	plus	GCCGGCAACTAGCTCTCTGCAACTCTCACACGGTTGCACACTGAAGCTAAGCAGGGCAGGTCAGTACCTGGATGAGAGACCCAATGGGAAAGCTAGATTGCTGC
585		3	15967757	15967868	plus	GCTTTGCCGGCATCTAGCTCTCTGCAGCTCTCACATGGTCGCCCACTGAAGCTAAGAAGCCTGGTAGGTACCTGGACGGGAGACCACATGGGAAAGCTAGGTTGCTGCTAGA
586		3	16003682	16003801	minus	TTTAGCCGGCAGCTAGCTCTCTGCAACTCTCACATGGTTGCCCACTGATGCTAAGCAGGGCTGCACCCAGTCGGTACCTAGACGGGAGACCACATGGGAAAGCTAAGTTGCTGCCGGAAG
587		3	16050805	16050927	minus	TTCACAGCCATGTCACCCTGCAGCCCTAGACCGGTTACTCACTGAAGCTAAGCAGGGCTGAGCCTGGTCAGCACCTGGATGGGAGACCACTAGGGAACACTAGGTTGCTGTTGGAAGTGGTGT
588		3	16223209	16223328	plus	TAAGCCACAGCACACATTACCCTGCAGACCAAGACCGGTTACTCACTGAATCTAAGCAGGGTTGAGCCTAGTCATTACCTGGATGTGAGACCACATGGGAAAACTAGGTTGCTGTTGGAA
589		3	16540923	16541038	minus	TACTCAGCCATATCACCCTGCAGCCCAAGACCGGTTACTCACTGAAGCTAAGCAAGGCTTAGCTTGGTCAGTACCTGGATGGGAGACCACATGGGGAAACTAGGTTGCTGTTGGCA
590		3	16546850	16546961	plus	ATCAGCTTGTATGCCGGCAATTCTCACATGGTCGTCCACTGAAGCTAAGCGGAACTGTGCATGGGCTGTACCTGGATGAGAGACACATGGGAAAGCTAGGTTGCTGCCGGAA
591		3	16964789	16964910	minus	ATTAGCCGGCAGCTAGCTCTCTGCAACTCTCACATGGTGGCCCACTGAAGCTAAGCAGGGCTGCGCCCGGTCAGTACCTGGATGGGAGACCACATGGGAAAGCTAGGTTGCTGCCGGAAGTG
592		3	16996609	16996711	plus	TATCACCCTGCAGCCCAAGACTGGTTACTCGCTGAAGCTAAGCAGGCTGAGCCTGGTCATTACCTGGATTGGAAAAACTAGGTTGCTGTTGGATGTAGTGTTA
593		3	17234779	17234895	minus	TGGCCGGCAGCTAGCTCTCGGCAACTCTCACATGGTCACCAACTGAAGCTAAGCAGGGCTGCGTCCGGTCAGTACCTGGATGGGAGACCACATGAGACAGCTAGGTTGCAGCCGGAA
594		3	17666852	17666967	minus	GTTTTGCTGTCAGCTAGCTCTCTGCAACTCTCACATGGTCACCCACTGAAGTAAGCAGGGCTGTGCCCGGCCTGGATAGGAGACCACATGGGAAAGCTAGGTTGCTGCCGGAAGTG
595		3	17962843	17962963	plus	CATCTGCTGGCAGCTAGCTCTCTGCAACTCTCACATGGACGCCCGCTGAAGCTAAGCAGGGCTGCGCCTGGTCTGTACCTGGATAGGAGACCACATGGGAAAGCTAGGTTGCTGCCAGAAG
596		3	18061672	18061787	minus	AGCCAGCAGCTAGCTCTCTGCGACTCTCACATGGTTGACAACTGAAGTTAAGCAGTGCTGCGCCTGGTCAGTACCTGGATAGGAGACAACATGGGAAAGCTAGGTTGCTGCCAGAA
597		3	18201657	18201772	minus	AGTAGCCTGCAGCTAGCTCTCTGCAACTCTCACATGGCCGCCCACCGACGCTAAGCAGGGCTACGCCCGGTCAGTACCATGGGAGGCCACATGGGAAAGCTAGGTTGCTGCTGGAA
598		3	18364125	18364235	plus	CCAGCAGCTAGCTCTCTGCAACTCTTACATGGTCGCCCACTGAAGCTAAGCAGGGCTACTTACAGTCTGGATGGGAGACCACATGGGAAAGCTAGGTTGCTGCTGGAAGTG
599		3	18718095	18718212	plus	AACTACAGCCATATCACACTGCAGCCCAAGAGTGGTTACTCACTGAAGATAAGCAGGGCTCAGCCTTGTCAGTACATGGATGGGTGACCACATGGGAAGAACTAGGTTCCTGTTGGAA
600		3	18742911	18743033	plus	GTCACAGCCATATCACCCTGCAGCCCAAGACCGGTTACTCTCTGAAGCTAAGCAGGACTGAGCCTGGTTCAGTACCTGGATGGGAGAGCACATGGGAAAACTAGGTACTTTTGGAAGTAGTGT
601		3	18767721	18767843	plus	ACGGATAGCAGCAGTCCCCAGATGTTCAAAGTCTCACATGGTCGCCCACTGAAGCTAAGCAGGGCTGCGCCCGGTCAGTACCTGGATGGGAGACCACTTGGGAAAGCTAGGTTGCTGCCGGAA
602		3	19163251	19163370	plus	AGCCACAGCCATATTACCCTGCAGCCCATAACCTGTTACTCACTGAAGCTAAGCAGGGCTGAGCCTGGTCAGTACCTAGATGTGAGACCACATGGAAAAGCTATGTTGCTGTTGGAAGTG
603		3	19183764	19183891	minus	GCTGGCAGCTAACTCTCTGCAACTCTCACATGGTCATCCACTGAAGCTAAGCAGGGCTGGGCCTGGTCAGTACCTGGAAACAATACCTGGAAAAGAGACCACATAGGAAAGCTAGGTTGCTGCCAGAA
604		3	19386105	19386211	minus	ATCACCCAGCAGCCCAAGACCGGTTACTCACTGAAGCTAACAGGACTGAGGATGGTCAGTACCTGGAAGGGAGACCACATAGGAAAACTATTTTGCTGTTGAAAGTG
605		3	19424796	19424911	plus	CAGCAGCTAGCTTTCTGCAACTCTCACATGGTCGTCCACTGAAGCTAAGCAGGGCTGCGCCTAGTCAGTACCTGGATGGGAGACCACATGGGAAAGCTAGGTTGCTGCTGGAAGTG
606		3	19627916	19628029	plus	AGCCACAACCATATCACCCTGCAGCCGAAGACTGATTTCTTGAAGCTAAGCAGGGCTGAGGCTGGTAAGTAGCTGGATGGGAGACCACATGGGAAAACTAGGTTGCTGTTGGAA
607		3	20294875	20294999	plus	TTATATATAAATAAATAGCTAGTTCTCTCCAACTCTCACATGGTCGCCCACTGAAGCTAAGCAGGGCTGCGCCTGGTCAGTACCTGGATGAGAGGCCACATGGGTAAGTTAGGTTGCTGCCGGAA
608		3	20530181	20530296	plus	CTAAACACAGCCATATTACCCTGCAGCCCAAGACAGTTACTCACTAAAGCTAAGCAGGGCTGAGACTGGCCAGTACCTGGATGGGAGGCCACATGGGAAATCTAGGTTGCTGTTGG
609		3	20826139	20826255	minus	AACCACAGCCATATCATCCTGCAGCCCAAGAGCTGTTACTCACTGAAGCTAAGCAGGGCTGAGCCAGGTTAGCACCTGGTTGGGAGACCATATTGGAAAACTTGGTTGCTGTTAAAA
610		3	20979247	20979366	minus	GCCACAGCCATATCACCCTACAGCCCAGGATCGGTTACTCACTGAAGCTTAGCAGGGCTGAGCCTGGCTATTACCTGAATGGGAGACCACATGGAAAAAACTAGGTTGCTGTTGGAAGTG
611		3	21163992	21164106	minus	TTGCGGCAGCTAGCTCTATGCAACTCTAACATGATTGCCCACTGAAGCTAAGCAGGGCTGCACCCGGTCAGTATCTGAATGGGAGACTACATGGGAAAGCTAGGTTGCTGCCAGA
612		3	21331691	21331799	minus	CACAGCCATTTCACCCTGCAGACCATGTACGATTACTTACTGAAGCCAAGCAGGGCTGAGCCTGGTCAGTACCTGGATGGAAGATCACATTCCTAGGTTGCTGTTGGAA
613		3	21480297	21480412	plus	CTTTTGCCAGCAGTTAGCTCTCTGCAACTCTCACATCGTCGCCCACTGAAGATAAGCAGGGCAGTACCTCAGTACCTGGATGGGAGACCACATTAAAAAGCTAGGTTGCTGCCGAA
614		3	21486372	21486492	minus	TGCCACAGCCTTATGACCCTGCAGCCCAAGACCGGTTACACACTGAAGCTAAGCAGGGTCAGTACCAGGATGGGAGTACCTGAATGGTAGACCACATGGGAAAACTAGGTTGCTGTTGGAA
615		3	21698931	21699045	minus	TGTCAGCAGCTAGCTCTCTGCAACTCTCACTTGATCGCCCACTGAAGCTAAGCAGGACTGCGCCCGGTTAATACCTAGAAGGAGACCACATAAGAAAGATACGTTGCTGCCGGAA
616		3	22438429	22438558	plus	AGTTATTATAGCCGGCAGCTAGCTCTCTGCAACTCTCACGTGGTCACCCACTGAAGCTAAGCAGGGCTGCGCCTGGTCAGTACCTGGATGGTAGACCCCATGCCTTATGGTAGAAAGGTAGATGTGGGTG
617		3	22549729	22549832	plus	GGCAGCTAGCTCTGCAACTCTCACATGGTTACCCACTGAAGCTAAGCAGAGCTGTGCCCGGTCAGTACCTAGATGGGAGACCACATAAAAAAGCTAGGTTACTG
618		3	23251946	23252059	minus	GCCACAGCCATATCAACCTGCAGCCCAAGAGCGGTTACTCGCTGAAGCTAAGCAGGGCTGAGCCTGGTTAGTACCTGCATGGGAGACCTCAATGGGAAACTAGGTTGCTGTTGG
619		3	23342457	23342559	plus	TTGACATCTAGCTCTCTGCAACTTTCACATGGTCGCCCACTGAAGCTAAGCAGGGCTGTGTCAGTACCTGGATGGGAGGCCACATGGGAAAGCTAGGTTGCTG
620		3	23687374	23687498	minus	CAGCAAAACACTTACTGACCACATGATCATCATAAAAACAGTGCAATGCGTCAATCTGAAGCTAAGCAGAGCTGTGCCCAGTCAGTACCTGGATGGGAGATAACATGAGAAAGCTAAGTTGCTGC
621		3	23687757	23687871	plus	GGCAGCTAACTCTCTTTAATTCTCACATGGTCACCCACCGAAGCTAAGCAGGGCTGCGCCTGGTCAGAACCTGGATTGGAGACCACATGGGAAAGTTAGGTTGCTGCCAAAAGTG
622		3	24272601	24272721	minus	TTTCACACTTAAAATATTACCCTGCAGCCCAAGACCCGTTACTCACTGAAGCTTAGCAGGGCTAAGCCTGGTCAGTACCTTGATGGGTGACCACATGAGAAAAACTAGGTTGCTGTTAGAG
623		3	24615212	24615333	minus	TGCCACAGCCATATCACCCTGCAGCCCAAGACCCAGACTCACTGAAGCTAAGCAGGGCTGAGCCTGGTCAGTACCTGGATAGGTGACCACATGGAAAAACTATGTTGCTGTTGGAAGTGGTG
624		3	24930667	24930779	minus	TTTAGCCAGCAGCTAGCTCTCTACAACTCTCGCATGGTTGCCCACTGAAGCTAAGCAGGGCTGCGCCCGGTCAGTACTTGGATGGGAGACAACATGGGAAAGCCAGGTTGCTG
625		3	25047133	25047253	plus	AACAGCCATATCACCCTGCAGCCCAAGACCGGTTACTCACTAAAGCTAAGCAGGGCTGAGCCTGGTTAGTACCTGGATGGGAGACCACTAGGGAACACTAGGTTGCTGTTGGAAGTGGTGT
626		3	25295928	25296046	plus	TTGGTCACAGCCTTATCACTCTGCAGCCTAAGACTGGTTACTCACTGAATCTAAAGAGGGCTGAGCCTGGTCAGTACCTGGATGGGAGACCACATGGGAAAACTAGGTTGCTGTTTAAA
627		3	25489293	25489405	plus	AATTGCCAAAGCCACATCAACCTGCAGCCCAACACCGATTACTCACTAAAGTTAAGCAGCTCAGGTCAGTATTGGATGGGAGACCACATGGGAAAACTAGGTTGCTGTTGGAA
628		3	25666586	25666687	plus	AGCTCAAGATTGCTTACTCACTGAAGCTAAGCAAGACTGAGCCTGGTCAGTACCTGGATGGGAGACCACATGGGAAAATCAGGTTGCTGTTGGAAGTGGTGT
629		3	25706284	25706417	minus	TCCTCTCAAGTTTTTTGACCGGCAGCTAGCTCTCTGCAACTCTCACATGGTCGCCCACTGAAGCTAAGCAGGGCTGCGCCCGGTCAGTACCTGGATGGGAGACCACATGGGAAAGCTAGGTTGCTGCCGGAAGT
630		3	25811067	25811177	plus	GCAGCTGGCTTTCTGCAACCCTCACATGGTCACCTAATGAAGCCAAGCAGGGCTGTGCCCGGTCAGTACCTGAATGTGAGACCACATGGGAAAGCTGGGTTGCTGCCAGAA
631		3	25866228	25866343	minus	TGCCGGCAGCTAGCTCTCTGCAACCCTCACATGGTTGCCTACTGAAGCCAAGTAGGGCTGCGCCTGGTCAGTACCTAGATGGGTGACCACATGGGAAAGCTGGGTTGCTGCCGGAA
632		3	26063474	26063588	plus	GCCACAGCCATATTACCCTGCAGCCCAAGACCAGTTATTCACTGAAGCGAAGCAAGGCTGAGCCTGGTTAGTATTGGATGGGAGATCACATGGGAAACTTAGGTTGCTGTTGGAA
633		3	26294350	26294460	minus	CAGCTAGCTCTCTGCAAGTCTCACACAGTTGCCCACTGAAGCTAAGCCGAGCTGCGCCCAGTCAGTACTTGGATGGGAGACTACATGGGAAAGCTAGGTGGCTGCCAGAAG
634		3	26532170	26532294	minus	TTATACATTTAATATCACCCTGCAGTCTAAGACCGGTTACTCAATGAAGCTAAGCAGGGCTGAGCCTGGTCAGTACCTGGATGGGAGACCACTTGAGAAAACTAGGTTGCTGTTGGAAGTGGTGT
635		3	26703468	26703597	plus	TTATATATTATAGCCGGCAGCTAGCTCTCTGCAACTCTCACATGGTCGCCCACTAAAGCTAAGCAGGGCTGCGCCCGGTCAGTACCTGGATGGGAGACCACATGGGAAAGCTAGGTTGCTGCCGGAAGTG
636		3	26952458	26952567	minus	TAGCCATATCACCCTGCAGCCTAATACTGGTTACTCACTGAAGCTAAGCAGAGCTGAGCTTGGTCATTACCTGGATGGGAGACCACGTGGGAAAACTAGGTTGCTGTTGG
637		3	27276257	27276369	plus	CACAGCCATATCACCCTGCAACCCAAGACCGGTTACTCATAGAAGCTTAGCAGGGCTGAGCCTGGTAGTGCCGGAATGGGAGATCACATGGGAGGGCTCGATTGCTGTTGGAA
638		3	27599447	27599560	minus	CACAGCCATATCACTCTGCAACCCAAGACCGGTTACTCACTGAGCTAAGCAGGGCTGAGCGTGGTCAGTACCTGAATGAAAGACCACATGGGAAAACTAGGTTGATGTTTGAAA
639		3	27876171	27876293	plus	TGCCACAGCCATATCACCCTGAAGCCCAAGACTAGTTACTCAATGAAGCTAAGCAGGGCTGAGCCTGGTCAGTACCTAGAAGGGAGACCACATGGGAAAACTAGGTTGGTGATGTAAGTGAGG
640		3	28098789	28098911	minus	AGCTGGCAGCTAGCTCTCTGCAACTCTCACATGCTCGCCCACTGAAGCTACTGTAAGCAGGGCTGTGCCCAGTCAGTATCTGGATAGGAGACCGCATTGGAAAGCCATAGGTTGCTGCCTGAA
641		3	28215853	28215968	plus	CTGGCAGCTAGCTCTCTGCAGCTCTCACATGATTACCCACTGAAGCTAAGCAGGGCTGTGCCCGGTCAGTATACCTGCATGGAAAACAACATGGGAAAGCTAGGTTGCTACCGGAA
642		3	28286753	28286876	minus	TGCCACAGCCATGTCACCCTGCAGCCCAAGACCGGTTACTCACTGAAGCTAAGCAGGGCTGAGCCTGGTCAGTACCTGGATGGGAGACCACTAGGGAACACTAGGTTGCTGTTGGAAGTGGTGT
643		3	28728441	28728556	minus	CACAGCCATATCACCCTGCAGCCCAAGACTAGTCATTCACTCTGAAGCTAAGCAGGGTTGAGCCTTTCAGTACCTGGATGGGTGACCACATTGGAAAACTAGGTTGCTGTTGGAAG
644		3	28915902	28916028	minus	TGTAACAGCCATGTCACCCTGCAGCCCAAGACTGGTTACTCACTGAAGCTAAGCAGGGCTGAGCCTGGTCAGTACCTGGATGGGAGACCACTAGGGAACACTAGGTTGCTGTTGGAAGTGGTGTTAG
645		3	29036178	29036305	plus	GCCGGCAGCTAGCTCTCTGTAACTCTTACATGGTTGTAGCAAATACTGTAGGTCTGAAGCTTAGCAGGCCTGCGCCCGGTCAGTACCTGGATGGGAGACCACAATGGAAAGCTAGGTTGCTGCCAGGA
646		3	29078306	29078426	minus	TATAGCCGGCAGCTAGCTCTCTGCAACTTCACATGGTCGCCCACTGAAGCTAAGCAGGGCTGCGCCTGGTCAGTACCTAAATAGGTGACCACATGAGAAAGCTAGGTTGCTGTTGGAAGTG
647		3	29121107	29121220	minus	CACAGCCATATCACCCTGCTGCCCAAGACCAGTTACTCACTAAAGCCAAGCAGGGCTGGGCCTGGCCAGTACCTGGATGGCAGACCACATGAGAAAACTAGGTTTCTGTTGGAA
648		3	29421799	29421920	minus	TTAAATAGCTATAGCAGCTAGCTCTTTGCCACTGTCACATGGTCACCCACTGAAGCTAAGCAGGCTGCACCTGGCCAGTACCTGATGGGAGACCACATGGAAAAGCTAAGTTGCTGTTGGAA
649		3	30260755	30260878	plus	AACTACAGCCATGTCACCCTGCAGCCCAAGACCGGTTACTCACTGAAGCTAAGCAGGGCTGAGCCTGGTCAGTACCTGGATGGGAGACCACTAGGGAACACTAGGTTGCTGTTGGAAGTGGTGT
650		3	30337967	30338088	plus	ATATGCACAGCCATGTCACCCTGCAGCCCAAGACCGGTTACTCACTGAAGCTAAGCAGGGCTGAGCCTGGTCAGTACCTGGATGGGAGACCACTAGGGAACACTAGGTTGCTGTTAAAAGTG
651		3	30413414	30413535	plus	TAAAGCCGGCAGCTAGCTCTCTGCAACTCTCACATGGTCACCCACTGAAGCTAAGCAGGGCTGCGCCCGGTCAGTACCTGGATGGGAGACCACATGGGAAAGCTAGGTTGCTGCCGGAAGTG
652		3	30669699	30669816	minus	TGCCACAGCCATATCACACTGCAGCCCAAGACTGGTTACTCACTGAAGCCAAGCATGGGCAGGGCCTGGTCAGTACCTGGATGGCCGACCACATGGGAAAACTAGGTTGCTGTTGGAG
653		3	30793209	30793332	minus	AGCCACAGCCATATCACCCTGCAGCCCAAGACCGGTTACCCGCTGAAGCTAAGCAGGGCTGAGCCTGGTCAGAACCTGTATGGGAGTCCACATGGGAAAACTAGGTTGCTGTTGGAAGTGGTGT
654		3	30884494	30884614	minus	GTAGCTGGCAGCTAGCTCTCTGCAACTCTCACATGGTCGCCCACTGAAGCTAAGCAGAGCTGCGCCTGGTCAGTATCTGCATGGGAGACCACATGGGAAAGCTAGGTTGTTGCCGGAAGTG
655		3	30957669	30957786	minus	TAATAGCTGGCAGCTAGCTCTCTGCAACTCTCACATGGTCGCCCACTGAAGCTAAGCAGGGCTGCACCCGGTCTGTATCTGGATGGGAGACCACATAGGAAAGCTAGGTTGCAGCCGA
656		3	31094651	31094767	minus	TAGCCGGCAGCTAGCTCTCTGAACTCTCACATGATCACCCACTGAAGCTATGCATGGCTGCGTCCGGTCAGTACCTGGATGGGAGACCACATGGAAAAGCTAGGTTTCTACTGGAAA
657		3	31325412	31325529	plus	ACCGGCAGCTAGCTCTCTGCAACTCTCACATGGTCGCCCACTGAAGCTAAGCAGGGCTGCGCCCGGTCAGTACCTGCATGGGAGACCACATGGGAAAGCTAGGTTGCTGCCGGAAGTG
658		3	31329480	31329599	plus	ATTAGTTGGCAGCTAGCTCTCTGCAACTCTCACATGGTCGCCCACTGAAGCTAAGCAGGGCTGCGCCTGGTCAGTACCTGGATGGGAGACCACATGGGAAAGCTAGGTTGCTGTCGGAAG
659		3	31458135	31458246	plus	GTTGCAATAGTTTCAGCAACTCTCACATGGTCGCCCACTGAAGCTAAGCAGGAATGCGCCTGGTCAGCACCAGGATGGGAGACCACATGGGAAAGCTAGGTTGCTGTTGGAA
660		3	32028155	32028279	minus	GCTCCACAGCCATATCACCCTGCAGCCCAAGACCGGTTACTCACTGAAGCTAAGCAGGGCTGAGCCTGGTCAGTACCTAGATGGGAGACGACTAGGGAACACTAGGTTGCTGTTGGAAGTGGTGT
661		3	32666979	32667091	plus	CGGCAGCTAGCTCTCTGCAACTCTCACATAATTGCCCATTTAAGCTAAGCAGGGCTGCACCCAGTCAGTACCAGGATTGGAGACCACATGGGAGAGCTATGATACTGTTGGAA
662		3	32810886	32811009	plus	AGCCACAGCCATATCACCCTGCAGCCCAAGACCGGTTACTCACTAAAGCTAAGCAGGGCTGAGCCTGGTTAGTACCTGGATGGGAGACCACTAGGGAACACCAGGTTGCTGTTGGAAGTGGTGT
663		3	32853438	32853552	plus	TATTGCCGGCAGCTAGCTCTCTGCAACTCTCACATGGTCGCCCACTGAAGCTAAGCAGGGCTGCGCCCGGTCAGTACCTGGATGAGAGACCACTTGGGAAAGCTAGGTTGCTACT
664		3	33064011	33064135	minus	CAGCCACAGCCATGTCACCCTGCAGCCCAAGACCGGTTACTCACTGAAGCTAAGAAGGGCTGAGCCTGGTCAGTACCTGGATGGGAGACCAGTAGGGAACACTAGGTTGCTGTTGGAAGTGGTGT
665		3	33275874	33275996	plus	TAAAGCAGCAGAAATTGGCAGCTCTCTGCAATGCCACATGATTGCCCACTGAAGCTAAGCAGGGCTGTACCCGGTCAGTACCTGGATGGGAGACCACACAGACAAGCTAGGTTGCTGCTGGAA
666		3	33318386	33318508	plus	TTGTGCGGATAATGTTTTTCTCTGCAACTCTCACATGGTCGCCCACTGAAGCTAAGCAGGGCTGCGCCCGGTCAGTACCTGGATGGGAGACCACATAGGAAAGCTAGGTTGCTGCCGGAAGTG
667		3	33819161	33819280	minus	GCTGGCAGCTAGGTCTCTGCAACTCTAACATGGTCACCAATTGAAGCTAAGCAGAGCTGTGCCTGGTCAGTAGCCGGATGGGAGACCACATGGAAAAACTACTGTAGGTTGCTGCTGGAA
668		3	33941334	33941435	plus	CACAGTCATATGACTCTGCAGCTCAAGACCGGTTACTCTGAAGCAGGACTGAGCCTGGTCAGTCCCTGGATGCGAGACCACATGGGAAAACAAGGTTGCTGT
669		3	34229707	34229824	plus	TGCGAAAGTGTACGACTCTCTGCAGCTCTCAAAGTGTCGCTCATTGAAGTTAAGCAGAGCTGTGCCCAGTCAGTGCCTGGATGGGAGACCACATATGAAAGCTAGGTTGCTGCCGGAA
670		3	34299032	34299149	plus	TTTGCCGGCAGCTAGCTCTCTGCAACTCTCACATGGTCACCCACTGAAGCTTAGCAGGGCTGCGCCTGGTCAGTACCTGGATGGGAGACCATATATAAAAGCTAGGTTGTTGCGGGAA
671		3	34709954	34710075	minus	AACAGCCACAGCCATATAACCCTGCAGCCCAAGACCGATTACTCACTAAAGCTAAGCAGGGTTGAGCCTGGTCAGTACCTGGATGGGAGACTACATGGGAAAACTAGGTTGTCTTTTGGATG
672		3	34765503	34765608	plus	CCACAGCCACATCACCCTGCAGCCCAAGACTAGTTACTCACTAAAGCTAAGCAGGTTTGGTCAGTACCTGGAGGGGAGACCACATGTGAAAACTAGGTTGCTTTGG
673		3	34780772	34780891	plus	TCTAGCTTCTAGCTCTCTGCAATTCTTACATGGTTGCCCACTGAAGCTACGCTAAGCAGGGCTGCGCCTGGTCAGTACCTGGATGGGAGACCACATGGGAAAGCTAAGTTGCTGCCGGAA
674		3	34962299	34962417	minus	TGCCACAGCCATATCACCCAGCAGCTCAAGACTAGTTACTCACTGAAGCTAAGCAGGGCTAAGCCTGGTCAGTACCTGGATGGGAGACCACATGGGAAAACTAGGTTGCTGTTGGAAGT
675		3	35061393	35061508	plus	TGCCGGCAGCTAGCTCTTTGCAACTCTCACATGGTCATCCACTGAAGCTAAGCAGGGCTGCGCCAGGTTAGTACCTGGATGGGAGACCACATAGGAAAGCTAGCTTGCTGCCAGAA
676		3	35150698	35150813	minus	CAGTCATATCACCCTGCAGCCCAAGATTGGTTTCTCATTGAAGCTAAGCAGGGCTGAGCCTGGTCAGTACCTGGATGGGTGACCACTTGGAAGACTTGGAAGTGGTATTAGTGAGG
677		3	35209452	35209572	minus	TGCCACAGCCATATCACTCTGCAGCCCAAGACTGGTTACTCACTGAAGCTAAGCAGGGCTGAGCCTGGTCAGTACCTAGATGGGAGACCACATGAAAAAAACTAGGTTGCTGTTGGAAGTG
678		3	35603550	35603670	minus	TAATGTTCCAGCAGCTAGCTCTCTGCAACTCTCACATAGTTGCCCACTGAAGCTAAGCAGACCTTCACCGAGTCAGTACCTGGATGGGAGACCACATGGGAAAGCAAGGTTGCTGCCGAAA
679		3	35955028	35955151	plus	AGCCACAGCCATGTCACCCTGCAGCCCAAGACCGGTTACTCACTAAAACTAAGCAGGGCTGAGCCTGGTCAGTACCTGGATGGGAAACCACTAGGGAACACTAGGTTGCTGTTGGAAGTGGTGT
680		3	36182634	36182744	minus	CAGCCATATCCCCCTGCAGCTCAAGACCGGTTACTCACTGAAGCCAAGGAGGGCTGCGCCTGGACCTGCACCTGGATGGGAGACGATGAGAAAACTAAGTTGCTGTTAGAA
681		3	36359379	36359499	minus	TGCCACAGTCACATCATTCTACAGCCAAAGACCGGTTACTCACTGAAGCTAAGCAGGGCTGAGCCTGGTCAGTACCTGGATGGGAGACCACATGAGAAAACTAGGTTGCTGTTGGAAGTGG
682		3	36386567	36386689	minus	TTTTCGCCGGCAGCTAGCTCTCTGCAACTCTCACATGGTCGCCCACTGAAGCTAAGCAGGGCTGCGCCCGGTCAGTACCTGGATGGGAGACCACATGGGAAAGCTAGGTTGCTTCCGGAAGTG
683		3	36614175	36614281	minus	CTAGCTCTCTTCAACTCTCACATGGTCACTCACTGAAGCTAAGCAGGGCTGCGCCAGGTCAGTACCTGCATGGGAGACTACATGGGAAAGCTGTGTTGGTGCCGGAA
684		3	36620553	36620677	plus	TAAATATTAGTTTATCACCCTGCTGCCCAAGACCGGTTACTCACTGAAGCTAAGCTGGGCTGAGCCTGGTCAGTACCTGGATAGGAGACCATTAGGGAACACTAGGTTGCTGTTGGAAGTGGTGT
685		3	36713505	36713628	minus	AGCCACAGCCATGTCACCCTGCAGCCAAAGACCGGTTACTCACTGAAGCTAAGCAGGGCTGAGCCTTGTCAGTACCTGGATGGGAGACCACTAGGGAACACTAGGTTGCTGTTGGAAGTGGTGT
686		3	36826013	36826135	minus	TGCAGCTTAGATTGCCCTGCACCAGGTTTGCTTTCAGACCCCTCTCACCCACTGGAGCTAAGCAGGGCTGTGCCCCCTCAGTACCTGAATGGGAGACCACATTGGAAATCTAGGTTGCTGCCG
687		3	37080445	37080567	minus	ATGTCAAAACCGGCAGCTAGCTCTCTGCAATTCTCACATGGTCGTCCACTGAAGCTAAGCAGGGCTGCGCCTGGTCAGTATCTGGACGGGAGACCACATGGGAAAGCTAGGTTGCTGTCAGAA
688		3	37115585	37115707	plus	CTAGCCACAGCCATATCACTCTGCAGCCCAAGATCGGTTACTCACTGAAGCTAAGCAGGGCTGAGCCTGGTCAGTACCTGGATGGGAAACCACATGGAAAAAAAACTAGGTTGCTGTTGGAGT
689		3	37505489	37505592	minus	TCACCTTGCAGCCCAAGACCGGTTTCTCACTGAAGCTAAGCAGAGCTGAGCCTATTTAGTGGTTGGATGGAAGAACACGTGAGAAAACTAGGTTGCTGTTGGAA
690		3	37905564	37905680	plus	TTTCCGGCAGCTAGCTGTCTGCAACTCTCACATGATCGCCCACTGAAGCTAAGTAGGGCTGCGCCCGGTCAGTACCTGGATGGAAGACCACATGGGAAAGCTAGGTTGCTGCCAGAA
691		3	38155509	38155624	minus	TAGCCGGCAGCTAGCTCTCTGCAATCTCACATAGTCACCCACTCAAGCTAAGCAGTGCTGCGCCCGGTCAGTACCTGGATGGGAGACAAAATGGGAAAGCTAGGTTGCTGCCGAAA
692		3	38535941	38536061	minus	TTTATGCCGGCTGCTAGCTCTCTGCAACTCTCACATGGTCACCCACTGAAGCTAAGCAGGGCTGTGCCCGGTCAGTACCTGGATGGGAGACCACATTGGAAAGCTAGGTTGCTGCCCGAAA
693		3	38676126	38676243	plus	GCCGGCAGCTAGCACTCTGCAACTCTTACATGGTCGTCCACTGAAGCTAAGCAGGGCTGCGCCTGGTCAGTATCTGGATGGGAGACCACATGGAAAAGCCAGGTTAATGCTGGAAGTG
694		3	38747151	38747267	minus	TAGCCAGCAGCTTACTCTTTGCAACTCTCACATGGTCGCCCACTGAAGCTAAGCAGGGCTGTGCCCGGTCAGTACCTGGATAGAAGACCACATAGGAAAGCTAGGTTGCTGCCGGAG
695		3	39040888	39041005	plus	AGCCACAGCCATATCACCCTGTAGCCCAAGAGAGGCTAACCACTGAAGCTAAGCAGGGCTGAGCCTGATCAGTACCTGAATGGGAGACCACATGGGAAAACTAGGTTGCTGTTGGAAG
696		3	39507577	39507704	minus	AACAGCCATACAAAACATTCCCCTGCAGCCCAAGACCGGTTACTCACTGAAGCTAAGCAGGGCTGACCCTGGTCAGTTCTTGGACGGGAGACCATATGGGAAAACTAGGTTGCTGTTGGAAGTTGTGT
697		3	39742961	39743098	plus	TCACAGTTTAATCTATGTTATAAAATGCATAAAAAGTTGTCTGGTACATTAACCGGTTACTCACTGAAGCTAAGCATGGCTGAGCCTGGTCAGTACCTGGATGGGAGACTACATGGGAAAACTAGGTTGCTGTTGGAA
698		3	39815490	39815614	minus	CCACAGCCATGTCACCCTGCAGCCCAAGACTGGTTACTCACAGAAGCTAAGCAGGACTGAGCCTGGTCAGTACCTGAATTGGAGACCACTAGGGAACACTAGGTTGCTGTTGGAAGTGGTGTTAG
699		3	39946828	39946944	minus	TGGTCACAGCCATATCAACCTGCAGCCCAAGACTGGTTACTCACTGAAGCTAAGCAGGGCTGAGCATGATTAGTACCTGGATGGAGGACCACATGGGAAAACTAGGTCTGTGTAAGT
700		3	39956554	39956677	plus	AAATGCAGCCATATCACCTTGCAGCCCAAGACTGGTTACTCACTAAAGCTAAGCAGGGCTGAGCCTGGTCAGTACCTGGATGGGAGACCACATGGGAGAACTAGGTGGCTGTTGGAAGTGGTGT
701		3	40066479	40066602	minus	CGCCACAGCCATATCACCCTGCAGCCCAAGACCGGTTACTCACTGAAGCTAAGCAGGGCTGAGCCTGGTTAGTACCTGGATGGGAGACCACTAGGGAACACTAGGTTGCTGTTGGAAGTGGTGT
702		3	40310671	40310786	plus	TGGCAGGTAGCTCTCTGCAACATGTGAGAACATGGTCACCCACAAACCTAAGCAGGGCTGTGCCTGGTCATTACCTGGATGGGAGACCACATGGGAAAGCTAGGTTGCTACCAGAA
703		3	40472950	40473059	plus	CCGGCAGCTAGCTCTCTGCAACTCTCACATGGTTGCCCACTGAAGCTAAGCAGGGCTGTACCTGTACCTGGATGGGAGACCACATGAGAAAGCTAGGTTGCTGCCAGAAG
704		3	40589448	40589563	minus	ATAACACCCTGCAGCCCAAGACCGCTTACTCACTGAAGCTAAGCAAGCTAAGCAGGGCTTAGCCTGGTCAGTACCTGGATGGTAGACCACATGGGAAAACTAGGTTGCTCTTGGAA
705		3	41170164	41170285	minus	GCTAATAGCCAGCAGCTTGGTCTCTGCAACTCTCACATATCTGCTCACTGAAGCTAAACAGGGCTGCACCTGGTCAGTACCTGGAAAGGAGACCACATAGAAAAGCTAGGTTGCTAACGGAA
706		3	41257348	41257471	minus	AGCCACAGCCATATCACCCTGCAGCCCAAGACCGGTTACTCACTGATGCTAAGCAGGGCTGAGCCTGGTCAGTACCTGGATGGGAGACCACTAGGGAACACTAGGTTGCTGTTGGAAGTGTTGT
707		3	41358553	41358677	plus	CTACAGCCATATCACCCTGCAGCCCAAGACTGGTTATTCACTGATGCTAAGCAGGGCTGAGCCTGGTCAGTACCTGGATGGGAGACCACTAGGGAACACTAGGTTGCTGTTGGAAGTGGTGTTAG
708		3	41666406	41666523	plus	GGCCACAGCAATATCACCCTGCAGCCCAAGATTGGTTACTTACTGAAGCTAAGCAGGGCTGAGCCTGGTCAGTACCTGGATGGGAGACCACATGGGAAAGCTAGGTTGCTGTTGGAAA
709		3	42491461	42491581	minus	GAATTAGCCGACAGCTACCCCTCTGCAACTCTCACATGGTCGCCCACTGAAGCAAAGCAGGCCTGTGCCCGGTTAGTACCTGGATGGGAGACCACATGGGAAAGCTTGGTTGCTGCCGGAA
710		3	42566136	42566260	plus	CACACACAGCCATATCACCCTGCAGCCCAAGACCGGTTACTCACTAAAGCTAAGCAGGGCTGAGCCTGGTTAGTACCTGGATGGGAGACCACTAGGGAACACTAGGTTGCTGTTGGAAGTGGTGT
711		3	42740456	42740564	plus	AGCTAGCTCTGTGCAATTCTCACATGGTAGCCCACTGAAGCTAAGCAGGGCTGGGCCAAGTCAATACCTGGATGGGGGACCAGATGGTAAAACTGGGTTGCTGCCGGAA
712		3	43839091	43839211	plus	GTTGCCAGCAGCTAGCTCTCTGCAACTCTCACGTGGTCACCCACTGCAGTTAAGCAGGACTGCGCCTGGTCAGTACCTGGATGGGAGACCACATGGGAAAGCTAGGTTGCTGCAGGAAGTG
713		3	43856086	43856202	plus	TAGCCGGCAGCTAGCTTTCTGCAACTCTCACCTGGTCACCCACTGAAGCTAAGCAGGGCTACGCCCAGTCAGTACCTGGATGGGAAACCACATGGGAAAGCTAGATTGCTGCCAGAA
714		3	44302564	44302682	minus	TGCCGGCAGCTAGCTCTCTGCAACTCTCACATGATTGCCCACTAAAGCTAAGCAGGGCTGCGCCTGGTCAGTAACTGAATGGGAGACCACATGGAAAAGCTAGGTTGCTGCTGGAAGTG
715		3	44307619	44307728	minus	GCCGGCAGCTAGCTCTCTCTGCAACATGGTTGCCCACTAAAGCTAAGCAGGGCTGCGCCTGGCCAGTCCTGGATAGGAGACCACATGGGAAAACTAGGTTGCTGCCAGAA
716		3	44503893	44504009	plus	ATGCTGGCAGCTTGCTCTCTGCAACTCTCACATGGTCGCCCACTGAAGCTAAGCAGGGTTGCGCCCGGTCAGTACCTGGATGGGAGACCACAAGGGAAAGCTAGGTTGCTGCTGGAA
717		3	44584385	44584493	minus	AGCTAGCTTTCTGCAACTCTCACATGGTCGTCCACTGAAGCTAAGCGGGGCTGCGCCTGGTCAGTACCAGGATGGGAGACCACATGGGAAAGCTAGATTGCTGCTGGAA
718		3	44625625	44625737	minus	CACAGCCATATCACCCTGTAGATCAAGACCAGTGGCTCACTAAAACTAAGCGAAGCTGAGCCTGGTTAGTACCTGGATGGGAGACCATATGGAAAAACTAGGTTGCTGTTGGA
719		3	44932348	44932468	minus	TATTACAGCTAAATCACCCTACAGCCCAAGACTGATTACTCACTTAAGCTAAGCAGGGCTGAGCCTGGTCAGTAGCTGGACGGGAGACCACATAGGAAAAATTAGATTGCAGTTGGTAGTG
720		3	44986930	44987066	plus	TTTAGGCTATTACCTAAACTGGCCCCAAAGGTGAAGAGATACTCTCTCTGTATGGTCACGCACTGAAGCCAAGCAGGGCTGTGCCTGGTCAGTTCCTGAATGGGAGACTACATAGGAAAGCTAGGTTGCTGCTGGAA
721		3	46051803	46051923	plus	TTAGCTGACAGCTAGCTCTCTGCAACTCTAACATGGTTGCCCACTGAAGCTAAGCAGGGTTGTGCCCTATCCGTACCTGAATGGGAGACCACATGGGAAAGCTAGGTTGTTGCCGGAAGTG
722		3	46792718	46792830	minus	TGGCTAGCTATCTGCAAGTCTCACATGGTCGCCCACTGAAGCTAAGCAGGGCTGCGCCTGGTCTGTACCTGGATGGGAGACCACATGGGAAAGCTAGGTTGCTGCTGGAAGTG
723		3	49348944	49349067	minus	CGCCACAGCCATGTCACCCTGCAGCCCAAGACCGGTTACTCGCTGAAGCTAAGCAGGGCTGAGCCTGGTCAGTACCTGGATGGGAGCCCACTAGGGAACACTAGGTTGCTGTTGGAAGTGGTGT
724		3	49923327	49923448	minus	ATGTACCGGCAGCTAGCTCTCTGCAACTCTCACATGGTCGCCCACTGAAGCTAAGCACTGCTGCGCCCGGTCAGTACCTGGATGGGAGACCACATGGGAAAGCTAGGTTGCTGCCGGAAGTG
725		3	50405250	50405364	plus	CCAACAGCTAGCTCTCTGCAACTCTCACATGGTCACCTACTGAAGCTAAGCAGGGCTGCGTCAGGTCAGTACCTGGAAGGGTGACCACATGGGAAAGCTAGGTTGCTGACGGAAG
726		3	50520638	50520757	plus	TAACATAGGCAGCTAGCTCTCTGCAACTCTCACATGGTCGCCCACTGAAGCTAAGCAGGGCTGCGCCCGGTCAGTACCTGGATGGGAGACCACTTGGGAAAGCTGGGTTGCTGCCGGAAG
727		3	51293470	51293587	minus	GACACAGCCATATCACTCTGTAGCTGAAGACTGGTTACTCACTGAAGCTATAAGCAGCGCTGAGCCTGGTTAGTATCTGGATGGAAGACCACATGGGAAAACTAGGTTGCTGTTGGCA
728		3	51716722	51716845	plus	TGCCACAGCCATATCACCCTGCAGCCCAAGACTGGTTACTCACTGAAGCTAAGCAGGGCTGAGCCTGGTAAGTACCTGGATGGGAGACCACTAGGGAACACTAGGTTGCTGTTGGTAGTGGTGT
729		3	51771256	51771362	minus	ACTGCTGGCAGCTAGCTCTCTGCAACTCTCACATGGTTGTCCACTAAAGCTAAGCAGGGCTGCGCCCGGTCAGTACCTGGATGGGAGACCACATGGGAAAGCATGGC
730		3	52031634	52031751	minus	TCCGGCAGCTAGCTCTCTGCAACTCTCACATGGTCGCCCACTGAAGATAAGCAGGGCTGCGCCCGGTCAGTACCTGGATGGGAGACCACATGGGAAAGCTAGGTTGCTGCCGGAAGTG
731		3	52041942	52042067	plus	CAGCCACAGCAATATCACCCTGCACCCCAAGACTGGTTACTCACTGAAGCTAAGCAGGGCTGAGCCTGGTCAAGCCCTGGATGGGAGACCACATGGAATAAACTAGGTTGCTGTTGGAAGTGGTGT
732		3	52128225	52128348	plus	AGCCACAGCCATGTCACCCTGCAGCCCAAGACCAGATACTCACTGAAGCTAATCAGGGCTGAGCCTGGTCAGTACCCGGATGGGAGACCACTAGGGAACACTAGGTTGCTGTTGGAAGTGGTGT
733		3	52365395	52365512	plus	GCTCATTCTGAAAACGTAGTCGCGTGGACGTTACTGGAGACGGTTACTCACTGAAGTTAAGCAGGGCTGAGCCTGCTCAGTACCTGGATGGGAGACCACATGGGAAAACAAGGTTGCT
734		3	52471725	52471848	plus	TTCGACAGCCATATCACCCTGCAGCCCAAGACCGGTTACTCACTGAAGCTAAGCAGGGCTGAGCCTGGTTAGTACCTGGATGGGAGACCACTAGGGAACACTAGGTTGCTGTTGGAAGTGGTGT
735		3	52654897	52655017	plus	ATAGCCGGCAGCTAGCTCACTGCAACTCTTACATGGTTGCTCACTGAAGCTAAGCGGGACTACGCCCGGTCAGTAGCTGGATGGGAGACCACATGGGAAAGCTAGGTTGCTGTTGGAAGTG
736		3	53245252	53245371	minus	GTTGGCCGGCAGCTAGCTCTCTGCAACTATCACATGGTCGCCCACTGAAGCTATGCAGGGCCATGCCCGGTCAGTACCTGGATGGGAGACCACATGGGACAGCTAGGTGGCTGTCAGAAG
737		3	53361307	53361417	minus	GCTGGCAGCTAGCTCTCTGCAACTCTCACATGGTCATCCACTGAACCTAAGCTGCGCTTGGTCAGTACCTGGATGGGAAACCATATAATAAAGCTAGGTTGGTGCCGGAAG
738		3	53434647	53434766	minus	TTTTGCCGGCAGCTAGCTCTCTGCATCTCTCACATGGTCACCCACTGACGCTAAGCAGGGCTGCGCCCGGTCAGTACCTGGATGGGAGACCACATGGGAAAAGCTAGGCTGCTGCCAAAA
739		3	53671641	53671760	minus	GTAGATGGCAGCTAGCTCTCTGCAACTCTCACATGGTCACCCCTGAAACTAAGCAGGGCTGCACCCGCTCAGTAACTGGATGGGAGACCACATGGGAAAGCTAGGTTGCTGTGTGAAGTG
740		3	53847795	53847901	plus	TGGTAGCTAGCTCTCTGCAAGTCCCACATGGTCGCCAACTGAATCTAAGCAGGGCTGTGCCCAGTCAGTACCTGGATGGGAGAGCACATGGAAAAGTTAGGTTGCTG
741		3	54459422	54459545	minus	TGCCACAGCCATGTCACCCTGCAGCCCAAGACCGGTTACTCACTAAAGCTAAGCAGGGCTGAGCCTGGTAAGTACCTGGATGGGAGACCACTAGGGAACACTAGGTTGCTGTTGGAAGTGGTGT
742		3	54577790	54577901	plus	TCACTAGCTCTCTGCTACTCTCACATGGTCGCCCACTAAAGCTAAGCAGGGCTGCACCTGGTCAGACACTGGACGTGGGAGACCACATGGGAAAGCTAGGTTGCTGCCAGAA
743		3	54663341	54663452	plus	CAGGCATATTACCCTGCAGCCCAAAACCGGCTACCCACTAAAGGTAAGCAGGGCTGAGCCTTATTAGTATCTGGATGGGAGACCACATGGAAAAACTAGGCTGCTGTTGGAA
744		3	54690066	54690178	minus	CGGCAGCTAGCTCTCTGCAACTCTCACATGGTTGCCCACTGAAGCTAAGCAGGGCTGCGCCCGGTCAATACCTGGATGGGAGACCAGATGGGAAAGCTAGTTTGCTGCCGAAG
745		3	54930152	54930263	minus	GGCAGCTAGCTCTATGCAACTCTCACATGGTCGCCTACTGAAGCTAAGCTGGGCTGCACCTGTTCAGTTCCTGGATAGGAGAACACATGGGAAAGCTAGGTTGATGCCGGAA
746		3	55044440	55044557	plus	CAGCTACAGCCATATCACCCTGCAGCCCAAGACCAGTAACTCACTGAGCTTAACAGGGCTGAGCCTGGTCAGAACCTGGATGGGAGACCACAGGGCAAAATTTGGTTGCTGTTGGAAG
747		3	55060131	55060247	minus	TGCCAGCAGCTACCTCTCTGCCACTCTCACATGGTCACCCACTGAAGCTAAGCAGGGCTGCGCCCGGTCAGTACCTGGATGGGAGACCACATGGGAAGCTAGGTTGCTGCCGGAAGT
748		3	55559605	55559728	minus	TGCCACAGTCATATCACCCTGCAGCCCAAGACCGGTTACTCACTGAAGCTAAGCAGGGCTGAGCCTGGTTAGTACCTGGATGGGAGACCACTAGGGAACACTAGGTTGCTGTTGGAAGTGGTGT
749		3	55670866	55670988	minus	TGTTCGCCGGCAGCTAGCTCTCTGCAACTCTCACATGGTCGCCCATTGAAGATAAGCAGGGCTGCGCCCGGTCAGTACCTGGATGGGAGACCACATGGGAAAGCTAGGTTGCTGCCGGAAGTG
750		3	55690341	55690445	minus	GAAAGCAAGCTAGCTTTCTGCAACTCTCACATGGTCGCCCACTGAAGCTAAGCAGGGCTTTACCTGGATGGGAGACCACATGGGAAAGCTAGGTTGCTACCAGAA
751		3	56115254	56115380	minus	GGCAGCTAGCTCTAGCCGGCAGCTAGCTCTCTGCAACTCTCACATGGTCGCCCACTGCAGTTAAGCAGAACTGCGCCCTGTCAGTACCTGCAAAAAACCACATGGGAAAGCTAGGTTGCTGCCGGAA
752		3	56148014	56148137	plus	AGCCACAGCCATGTCACCCTGCAGCCCAAGACCGGTTACTCACTGAAGCTAAGCAGGGCTGAGCCTGGTCAGTACCTGGATGGGTGACCACTAGGGAATACTAGGTTGCTGTTGGAAGTGGTGT
753		3	56157017	56157133	minus	GCCACAGCCATATCACCCTGCACCCTGGTTACTCACTGAAGCTAAGCAGGGCTGAACCTGGTCAGTACCTGGATGGGTAACCACATGGTAAAACTAGGTTGCTGTTGGAAGTGGTGT
754		3	56259405	56259529	plus	TGGCCACAGCCATGTCACCCTGCAGCCCAAGACCGGTTACTCACTGAAGCTAAGCAGGGCTGAGCCTGGTCAGTACCTGGATGGGAGACCACTAGGGAACACTAGGTTGCTGTTGGAAGTGGTGT
755		3	56687903	56688009	plus	ATAGCTCTCTGTAACTCTCACATGGTCGCCCACTGAAGCTAAGCAGGGCTGCGCCCGGTCAGTACCTGGAAGGGAGGCCACATGGGAAAGCTAGGTTGCTGCCGGAA
756		3	57163936	57164054	minus	GCAGCATTGCCGGCAGCTAGCTCTCTGCAACTCTCACATGGTCGCCCACTGAAGCTAAGCAGGGCTGTGCCCGGTCAGTGTCTGAATGGGAGACCACATGGGAAAGCTAGGTTGGTGTT
757		3	57224567	57224685	plus	AGCCACAGCCATATCACCCTGCACCCCAAGACTGGTTACTCACTGAAGCTAAGCAGGGCTGAGCATGGTCAGTACCTGGATGGGAGACCACATGGGAAAACTAGGTTGCTGTTAGAAGT
758		3	57279286	57279410	minus	GACATATTCGGCCGGCAGCTAGCACTCTGCAACTCTCACATGGTCGCCCACTGAAGCTAAGCAGGGCTGCGCCCGGTCAGTACCTGGATGGGAGACCACATGGGAACGCTAGGTTGCTGCCGGAA
759		3	57461098	57461201	plus	TCTCCTGCAGCGAGCTCTCTGCAACTCTCACATGTTCGCCCACTGAAGCTAAGCAGGGCTGCGCTCGGTCTGTACCTGGATGGGAGACCACATGGGAAAGCTAG
760		3	57500200	57500325	plus	TAAGCCACAGCCATGTCACCCTGCAGCCCAAGACTGGTTACTCACTGAAGCTAAGCAGGGCTGAGCCTGGTCAGTACCTGGATGGGAGACCACTAGGGAACACTAGGTTGCTGTTGGAAGTGGTGT
761		3	58206450	58206568	plus	CCACCGCCATATCACCCTGCAGCCCAAGACTGGTTATTCACTGAAGCAAAGCAGGGCTGGTCAGTACCTGCATGGGATACCACATGGGAACCCTAGGTTGCTGTTGGAAGTGGTGTTAG
762		3	58274125	58274236	plus	ATAGCTAGCTCTCTGCAACTCTCACATGGTCGCCCACTGAAGCTAAGCAGGGCTGCGCCCGGTCAGTACCTGGATGGGAGACCACTTGGGAAAGCTAGGTTGCTGCCGGAAG
763		3	58698981	58699097	plus	GGCCGGCAGCTAGCTCTCTGCAACTCTCACATGGTCGCCCACTGAAGCTAAGCAGGGCTGTGCCCGGCCAGTACCTGGATGGGACACCACATGGGAAAGCTAGGTTGCTGCCGGAAG
764		3	59127008	59127133	plus	TTTGCCACAGCCATTTCACCCTGCAGCCCAAAACCGGTTACTCACTGAAGCTAAGCAGGGCTGAGCCTGGTTAGTACCTGGATGGGAGACCATTAGGGAACACTAGGTTGCTGTTGGAAGTGGTGT
765		3	59367401	59367525	plus	GCCGGCAGCTGGCTGCTAGCTCTCTGCAACTCTCACATGGTCATCCACTGAAGCTAAGCAGGGCTGCGCCCGGTCAGTACCTGGATGGGAGACCACATGGGAAAGCTAGGTTGCTGCCGGAAGTG
766		3	59503801	59503922	minus	CTTAACTAGCCGGCAGCTAGCTCTCTTCAACTCTCAGATGGTCGCCCACTGAAGCTAAGCAGGGCTGTGCCTGGTCAGTACCTGGATGGGAGACCTCATGGGAAAGCTAGGTTGCTGCTGGA
767		3	59546406	59546524	plus	ACTAGCCGGCAGCTAGCTCTCTGCAACTCTCACATGGTTGCCCACTGAAGCTAAGCAGGGCTGCGCCCGGTCAGTACCTGGATGGGAGACCACTTGGGAAAGCTAGGTTGCTGCTGGAA
768		3	59606922	59607043	plus	CTTTACCGGCAGCTAGCTCTCTGCAACTCTCACATGGTTGCCTACTGAAGCTAAGCAGGGCTGCGCCTGGTCAGTACCTGGATGAGAGACCACATGGGAAAGCTAGGTAGCTGCCGAAAGTG
769		3	59607203	59607325	minus	ATTTGGCTGGCAGCTAGCTCTCTGCAACTCTCACATGGTCGCCTACTAAAGTTAAGCAGGGCTGCGCCTGGTCAGTACCTGGATGGGAGACCACATGGGAAAGCTAGGTTGCTGCCGGAAGTG
770		3	59850240	59850355	plus	ACCACAGCCATATCACCCTGCTGCACAAGACCGTTTACTCATTGAAGCTAAGCATGGCTGAGCCTGTTCAGTACCAGGATGGGAGACCACATAGGAAAACTAGGTTGCTGTTAGAA
771		3	60205111	60205225	minus	GGCAGCAGCTAGCTCTCTGCAACTCTTTCAGGGTCGCCCACTCAGGCTAAGCAGGGCTGCGCCCGGTCAGTACCTGGATGGGAGAACACATGGGAAAGCTTGGTTGCTGCCGGAA
772		3	60242897	60243025	minus	TTGAGAAACTGTTCTACTGTGATAACCCGCAGCTTGCTCTCACATGCTCGCTCACTGAAGCTAAGCATGGCTGCGCCTGGTCAGTACCTGGATGGGAGAACACATGGGAAAGCTAGGTTGCTGCCTACC
773		3	61050782	61050904	plus	GCCACAGCCATATCACCCTGCAGCCCAAGACTGGTTACTCACTGAAGCTAAGCAGGGCTGAGCTTGGTCAATACCTGGATGGGAGACCACATTGGAAAACTAGGTTGCTGTTGGAAGTGGTGT
774		3	61537475	61537598	minus	GGCCACAGCCATGTCACCCTACAGCCCAAGACCGGTTACTCACTGAGGCTAAGCAGGGCTGAGCCTGGTCAGTACCTGGATGGGAGACCACTAGTGAACACTGGGTTGCTGTTGGAAGTGGTGT
775		3	61540999	61541124	plus	CAACACCAACCACAGCCATGTCACCCCGCAGCCCAAGACCGGTTACTTACTGAGGCTAAGCAGGGCTGAGCTTGGTCAGTACCTGGATGGGAGACCACTAGGGAACACTAGGTTGCTGTTGGAAGT
776		4	406210	406333	plus	TGCCACAGCCAGATCACCCTGCAGCAGGAGAGCGGTTACTCACTGAAGCTAAGCAGGGCTGAGCCTGGTCAGTGTCTGGATGGGGGACCACATGGGAAAGCTAGGTTGTTGTTGGCAGTGGTGT
777		4	511646	511749	minus	AACTCATGCAACTCTCGCATGGTCGCCCACTGAAGCTAAGCATTGCTGAGCCTGGTCAGTACCTGGATGGGAGACCACATGGGAAAGCTAGGTTGCTGCCGGAG
778		4	540819	540942	plus	TGCCACAGCCATATCACCCTGCGGCCCAAGAGCGGTTACTCACTGAAGCTAAGCAGGGCTGAGGCTGGTCAGTGTCTGGATGGGAGACCAGATGGGAACACTAGGTTGCTTTTGGCAGTGGTGT
779		4	583084	583192	plus	CCGGCAGCTAGCTGTCTGCAACTCTCGCATGGTCGCTCACTGAAGCTAAGCAGGACTCGGTCAGTACCTGGATGGGAGACAACATGGGAAAGCTAGGTTGCTGCCGGAA
780		4	597487	597600	minus	TTTAGCCGGCAGATAGCTCTCTGCAACTCTCACATGGTCACCCACTGAAGATAAGCAGGGCTCGGTCAGTACCTGGATGGGAGACCACATGGGAAAGCTAGGTTGCTGCCAGAA
781		4	972128	972237	minus	AGCCACAGCCATTTCACCCTGCAGCCCAAGACTCACTGAAGCTAAGCAGGGCTGAGGCTGCTCAGTACCTGGATGGGTGACCACATGGGAAAACTAGGTTGCTGTTGGAA
782		4	1156751	1156863	minus	TAGCTAGCGCTCTGCAACTCTCACATGATCGCCCACTGAAGCTAAGCAGGGCTGCGCCTGGTCAGTACCTGTATGGGAGACAACATGGGAAAGCTAGGTTGCTGCTGGAAGTG
783		4	1178075	1178196	plus	TAAATATGCTGGCAACTAGCTCCCTGCAGCTCTCACATGGTCGCCCACTGAAGCTAAGCAGGGCTGCCCCCGGTCAGTACCTGGATAGGAGACTACATGGGAAAGCTAGGTCGCTGACGGAA
784		4	1858006	1858131	plus	TTTGCCACAGCCATATCACCCTGCAGCCCAAGACCGGTTACTCACTGAAGCTAAGCAGGGCTGAGCCTGGTCAGTACCTGGATGGGAGACCACTAGGGAACACTAGGTTGCTGTTGGAAGTGGTGT
785		4	2383346	2383461	plus	GCCGGCAGCTAGCTCTCTGCAACTCTCACATGGTCGCCCACTGAAGCTAAGCAGGGCTGCGCCCGGTCAGTACCTGGATGGGAGACCACATGGGAAAGCTGGGTTGCTGCCGGAAG
786		4	2651812	2651918	plus	GCCATATCATCCTGCAGCCCAAGACCGGTTACTCACTGAAACTAAGCAGGGCTGAGCCTGGTCACTACCTGAATGGGAGACCACATGGGAAAACTAGTGGTGTTGGT
787		4	3157783	3157899	plus	AAACTAACAAAATCTTAGCTCTCTGCAACTTTCACATGGTCGCTCCCTGAAGCTAAGCAGGGCTTCGCTTGGTCATTACCTGCATGGAAGACTATGTGGAAAAAGCTAGGTTGCTGC
788		4	3182980	3183096	plus	GTCACAGCCATATCACCCTGCAGCCCAAGACCGGTTACTCACTGAAGCTAAGCAGGGCTAAGCCTGGCCAGTACCTGGAAGGGACATCACATTGGAAAACTAGGCTGATGTTGGAAG
789		4	3934935	3935055	minus	CAATGCCATGTCACCCTGCAGCCCAAGACCGGTTACTCAATGAAGCTAAGCAGGGCAGAGCCTGGTCAGTACCTGGATGGGAGACCACTAGGGAACACTAGGTTGCTCTTGGAAGTGGTGT
790		4	4390036	4390159	minus	CAAGTAGCCGGCAGCTAGATCTCTACAACTCTCACATGATTGCCCACTGAAGCTAAGCAGGGCTGCGCCTGGTCAGTACCTGGATGGGAGACCACATGGAAAAGCTAGGTTGCTGCCGGAAGTG
791		4	4681828	4681938	plus	CAGCCATATCACCATGCAGACCAAGAGCGCTTACTCACTGAAGCCAAGCAGGGCTGAGCCTGGTCAATACCTGGATGGTAGACCACATGGGACCACAGGTTGCTGTTGGAA
792		4	5018229	5018344	minus	TTTGGCGGGCAGCTATCTACCTACTAATCTCACATGGTCGCCCACTGAAGCTAAGCAGGGCTGCGCCCGGTTAGTACCTGGATGGGAGACCACATGGGAAAACCAGGTTGTTGCTG
793		4	6062405	6062516	plus	CCGGCAGCTAACTCTGCAACACTCACATGGTTACCCACTGAAGCTAAGCAGGGCTGCGCCCAGTCAGTACCTGGATGGGAGGCCACATGGGAAAACTAGGTTGCTGCTGGAA
794		4	6088869	6088971	plus	AATGCTGCAACTCTCAGATGGTCGCCCACTGAAGCTAAGCAGGGCTGCGCTCGGTCAGTACCTGGATGAGAGACCCCACGGGAAAGCTAGGTTGCTGCCGGAA
795		4	6862364	6862472	plus	CCACGACCATATCACCACCCAAGACTGGTTACTCACTGAAGCTAAGCAGGGCTGAGCCTTGTCTGTACCTGGATGGGAGACCACATGGGAAAACCTGGTTTCTGTTGGA
796		4	6906146	6906281	plus	ATCGGCAGTTTCTCATCAAATCTTGACCAATCGAAACCTCTCTAGTATAGCCAGCAGCTAGCTGGAGCTAAGCAGGGCTGTGCCCGGTCAGTACCTGGATGAGAGACCACATGGGAAAGCTAGGTTACTGCCGGAA
797		4	7016599	7016713	plus	TAATAGTCATATCACCCTGCAGCTCAAGACCGGGTCTTCACTGAAGCTAAGAAGGGCTGAGCCTGGTCTGTACCTGGATGGGAGACCACATGGGAAAACTAGGCTGCTGTTGAAA
798		4	7176633	7176737	minus	ACAGCCATATCACCCTGCAGCCCAAAAGCAGTTACTCACTGAAGCTTAGCAGGGCTGAGCCTGGTCAGTCCCTGGGTGGGAGGCCACATGTGAAAACTAGGCTGC
799		4	7450517	7450641	plus	TAGCCACAGCCATGTCACCCTGCAGCCCAAGACCGGTTACTCACTGAAGCTAAGCAGGGCTGAGCCTGGTCAGTACCTGGATGGGAGACCACTAGGGAACACTAGGTTGCTGTTGGAAGTGGTGT
800		4	7671343	7671465	minus	TCCACAGCCACATCACCCTGCAGTCCAAGACTGGTTACTCACTGAAGCTAAGCAGGGCTGAGCCTTGTCAGTACCTGGATGGGAGATCACATGGGGAAACTAAGTTGCTGTCGGAAGTGGTGT
801		4	8125966	8126081	plus	GCCACAGTCATATTACCCTGCAGCCTAAGACCAGTTACTCACTGAAGCCAAGCAGGGCTGAGCGTAGACAGTACCTGGTTGGGACACCACATGGGAAAACTAGATTGCTGTTGGAA
802		4	8132717	8132837	minus	CCTTACAGTCACATCACTCTGCAGCCCAAGACCAGTTACTCACTGAAGGTAAGCAAGGCTGAGCCTTGCCATTACCTGGATGGGAGACCACATGGGAAAAGCTAGGTTTCTGTTTGAAGTG
803		4	8367627	8367738	plus	TTGCCGGCAGCTAGCTCTCTGCAACTCTCACATGGATGCCCACTGAAGCTAAGCAGGACTGCGCCCAGTCAGTACCTGGATGGGAGACCACATGGGAAATTTAGGTTACTGA
804		4	8502772	8502885	plus	CCAGCAACTAGCTCTCTGCAGCTCTCACATGGTCACCCACTGAAGCTAAGAAGGGCTGTGCCCGATTAGTACCCGCATGGGAGACCACATGGGAAAACTACGTTGCTGCCGGAA
805		4	8586871	8586992	minus	GTCGGCAGCTAGCTCTCTGCATCTTGCCAACTGCACATGGTCCTCCACTGAAGCTAAGCGGGGCTGTGCCCAGTCAGTACCTGTATAGGAGACCACATGGGAAAGCTAGGTTGTTGCCGGAT
806		4	8940020	8940121	plus	CCAGCAGCTAGCTCTCTGCAACTCTTACATGGTCGCCCACTGAAGCTACTTGGTCAGTACCTGGATGGGAGACCACATGAGAAAGCTACATTGCTGCCGGAA
807		4	9110166	9110280	minus	TCACAGTCTAATCACCCTGCAGCTCAAGACTGGTTACTCACTTAAGCTAAGCAGGGCTGAGCCTGGTTAGCACTTGGATGGGAGACCACATGGGAAAACTAGGTTGCTGTTGGAA
808		4	9429348	9429471	plus	TGCCACAGCCTTATCACCCTGCAGCCCAAGACAGGTTACTTGCTGAAGCTAAGCAGGGCTGAGCCTGGTCAGAACCTGGATGGGAGACCACATGGGGAAACTAGGTTGCTGTTGGAAGTGGTGT
809		4	9927721	9927835	minus	GCTGGCAGCTAGCTCTCTGCAACTCTGACATGGTCGCCCACTGAAGCTTAGCAGGGCTGCGCCTGGTCAGTACCTGGATAGGAGACCACATGGAAAAGCTAGGTTGCTGCCGGAA
810		4	10221461	10221575	minus	GCAGGCAGCTAACTCTATGCGGCTCTCACATGGTCGCCCACTGAAGCTAAGCAGAGCTGCGCCCGGTCACTACCTGGATGGGGGACCACATGAGAAAGTTAGGTTGTTGTCGGAA
811		4	10492349	10492473	plus	TTGGCCACAGCCATATCACCCTGCAGCCCAAGACCAGTTACTCACTGAAGCTAAGCAGGGCTGAGCCTGGTCAGTACTTGAATGGGAGACCACTAGGGAACACTAGGTTGCTGTTGGAAGTGGTG
812		4	10662705	10662829	minus	AGCCACAAGCCATGTCACCCTGCAGCCCAAGAACGGTTACTAACTGAAGCTAAGCAGGGCTGAGCCTGGTCAGTACCTGGATGGGAGACCACTAGGGAACACTAGGTTGCTGTTGGAAGTGGTGT
813		4	11567191	11567314	plus	TGTCACAGCCATATCACCCTGCAGCCCAAGAGTGGTTACTCACTGAAGCTAAGCAGGGCTGAGCCTGGTCAGTACCTGGATGGTAGACCTCATGGGCAAACTAGATTGCTGTTGGAAGTGGTGT
814		4	12596831	12596955	minus	GTTGAAAGCCATTGTATTGTCTTCAGCGTGTAAGCAAGACCTGTGACTAATGAATGAAGTTTCAGTCACACACCTGGATGTACCTGGATGGGAGACCACATGGGAAAGCTAGGTTGCTGCCAGAA
815		4	12841864	12841993	plus	TTTTTCATCATTGCCGGCAGCTAGCTCTCTGCAACTCTCACATGGTCGCCCACTGAAGCTAAGCAGGGCTGCGCCCGGTCAGTACCTGGATGGGAGACCACATGGGAAAGCTAGGTTGCTGCCGGAAGTG
816		4	13295789	13295903	minus	GCCTGCAGCTAGCTTTCTGCAACTCTCACATGGTCACCCACTGAAGCCAAGCAGGCCTGTGCCTGGTCAGTACCTGAATGGGAGATCACATTGGAAAGCTAGGTTGCTGCTGGAA
817		4	13396036	13396156	minus	TTTATGCTGGCAGCTAGCTCTCTGCAACTCTCACATGGCTGCCCATTAACGCTAAGCAGGCCTGCGCCAGTTCAGTACCTGGATGGGAGACCACATGGGAAAGCTAGGTTGCTGCCAGAAG
818		4	14377672	14377789	minus	TGGTCGGCAGATAGCTCTCTACAACTCTCACCTGGTCGCCCATTGAAGCGAAGCAGGGCTGCGCCTGGTCAGTACCTGAATGGGAGACCACATGGGAAAGCCAGGTTGCTGCTGGAAA
819		4	14745826	14745937	minus	AGCTATAGCCATTTCATCCTGCATCCCCAGACTGGTTAGTCACTAAAGCTAAGCAAGGCTGAGCCTGGTCAGTACCTGAATGGGAGACCACATGGGAACACTAGGTTGCTGT
820		4	15465473	15465585	minus	AGCCTTATCAACCTGCAACCCATGACCAGTTACTCACTGAAGCTAAGCAGAGCTAAGCCTGGTCAGTACCTGGATGAGAGACCACATGGGAAAACTAGATTGCTGTTGGAAGT
821		4	16214662	16214785	minus	TGCCAAAGCCATATCACCCTGCACACCAATACCGGTTTCTCACTGAAGCTAAGCAGGGCTGAGCCTGGTCGGTACCTGGATGGGAGATCACATGGGAAAACAAGGTTGCTGTTGGAAGTGGTGT
822		4	17073004	17073121	plus	TGCCACAGCCATGTCACCCTGCAGCCCAAGACCGGCTACTCACTGAAGCTAAGCAGGACTGAGCTTGGTCAGAACCTTGATGGGAGATCACATGGGAAAAACTAAGTTGCTGTTGCAA
823		4	17982525	17982643	minus	ACAGCTGCAGCCATATCACCCTGCAGCCTAAGACCGGTTACTCACTGAAGCCAAGCAGGGCTGAGCCTGGTCAGTACCTGGATGGGAGACCACATGGGAAAACCAGGTTGCTGTTGGAA
824		4	18122844	18122958	plus	CCTTATCACCCTGCAGCTCAAGACCAGTTACTCACAGAAGCTAAGTAGGGCTGAGCCTGGTCAGTACCTGGATGGAAGACCACATGGGAAAACTAGGTTGCTGTTGGAAGTAGTG
825		4	18124877	18124986	minus	GCAGCTAGTTTTATGTAGCTCTCACATGGTTGCCCACTGAAGCTAAGCAGGACTTTGCCTGTTAGAACCTGATTGGGAGATGACATGGTAAAACTAGATAGCTGCCAGAA
826		4	18172645	18172765	minus	TAATAATGGCAGCTAGCTCTCTGCAACTCTCACATGGTCGCCCACTGAAGCTAAGCAGGGCTGCGCCCGTGGTCAGTACCTGGTTGGGAGACAACATGGGAAAGCTAGGTTGCTGCTGGAA
827		4	18200430	18200541	minus	GGCTGCTAGCTCTCTGCAACTTTAACATGGTCACCCATTAAAGCTTAGCAGGGCTGTGCCCAGTCTGTACCTGGATGGGAGACCACATGGAAAAGCTAGGTTGCTGCCAGAA
828		4	18321549	18321675	plus	AACGGCCACAGCCATGTCACCCTGCAGCCCAAGACCGGTTACTCACTGAAGCTAAGCAGGGCTGAGCCTGGTCAGTACCTGGATGGGAGACCACTAGGGAACACTAGGTTGCTGTTGGAAGTGGTGT
829		4	18927992	18928100	plus	GCCGGCAGCTAGCCCTCTTCAATTCTCACATGGCCGCCCACTGAAGTGAAGCAGAGCTGCACCTGGTCAATATCTGGATGGGAGACCACATGGGAAAGTTAGGTTGCTA
830		4	19108348	19108468	plus	AATAGCAGCTAGCTCTCTGTAACTCTCATATGGTCGCCCACTGAAGCTAATGTAAGCAGGGGTTGTGCTTGGTCAGTACCTGGATGGGAGACCACATGGGTGAGCTAGTTTGCTGCCAAAA
831		4	20304663	20304779	plus	TCGGCAGCTAGCTCTCTGCAACTCTCACATGGCCACCCACTGAAGCTAAGCAGGGCTGTGCGCGGTCAGTACCTGGATGGGAGACCACATGGGAAAGCTAGGTTGCTGCCGGAAGTG
832		4	20675074	20675195	minus	TTTCACAGCCAAATCCCCCTGCAGCCCAAGACTGGTTACTCACTGACGCTACAGTAAGCAGGGCTGAGCCTGGTCAGTAACTGAATGGGAGACCACATGGGAAAACTAGGTTGCTGTTGGAA
833		4	20788753	20788870	plus	TGGTACAGCCAAATCAACTTGCTGCCCAAGACTGGTTACTCACTGAAGCTAAGCAGGGCTAAGCCTGGTTAGTACCTGGATGGAAGACCACATGAAAAAAACTTGGTTGTTGTGAAAA
834		4	21070048	21070164	plus	GCACACACCCAAATCACCCTGTATCCCAAGACCGGCTACTTACCGAAGCTAAGCAGGACAGAGTCTGGTCAGTACTTGGATGGGAGACCACATGGGAAAACTAGGTTACTATTGGAT
835		4	21905788	21905892	plus	CCACAGCCATATAACCCTGCAGCCCAAGTCCGGTAACTCACTGCTAAGCAGGGCTGAGCCTGGTTAGTGCCTGGATGGGAGACCACATAGGAAAACTAGGTCGCT
836		4	22120878	22120993	plus	AGCCGCAGCCAAATAACCCTGCAGCTCAAGACTGGTTACTCATTGAAGCTAAGCAAGGCTGAGCCTGGTCAGTACCTGAATGGGAGACCACATGGGAAAACTAGGTTGCGTTGGAA
837		4	23516020	23516142	minus	CAAAAGCCGGCAACTAGCTCTCCGCAACTCTCACATGGTCGCCCACTGAAGCTAAGCAGGGCTGCGCCCGATCAGTACCTGGATGGGAGACCACATGGGAAAGCTAGGTTGCTGCCGGAAGTG
838		4	23658288	23658403	plus	GCCATAGCCATATCACCCTGCACCCCAAGGCCGGTTACTCACTAAAGCTAAGCTGGGCTGAGCCTGGTCAGTACCTACATGGAAGACCACATGGAAAAACTAGGTTGCTGTTGAAA
839		4	23698345	23698480	minus	TGCCACAGCCATATCACTCTGAAGCCCAAGACTATTCTACACAAAACTATATGGTTATTTACTGAAACTAAGCAGGGCTGAGCCTGGTCAGTACCTGGATTGGAGACCACACGGGAAAACTAAGCTGGTGTTGATA
840		4	23730842	23730956	minus	TAAGGCAGCTAGCACTTTGCAGCTTTCACATGATTGCCCACTGAAGCTAGGCAGGGTTGTGCCTGGTTAGTACCCGGATGAAAGGCTACATGGGAAAATTAGGTTGCTGCTGAAA
841		4	24858915	24859034	minus	ATCCACAGCCATATCACCCTGCAGCCCAAGACCAGTTACTCACTGAAGCTAAGCAGGGCTGAGCCTGGTCAGTACCTAGATGGGAGACCACTTGGGAAAACCAGGTTGCTGTTTGAAGTG
842		4	25128186	25128289	minus	TTGCAGCTAGCTCTCTGCAACTCTTCTCTCACATGGTCGCCCACTGAAGCTAAGGTCAGTACCTGGATGCGAGACCACATGGGAAAGCTAGGTTGCTGTCAGAA
843		4	25554681	25554805	plus	TTTCCACAGCCATGTCACCCTGCAGCCCAAGACCGGTTACTCACTGAAGCTAAGCAGGGCTGAGCATGGTCAGTACCTGGATGGGAGACCACTAGGGAACACAAGGTTGCTGTTGGAAGTGGTGT
844		4	25851585	25851704	minus	AATATCAGCCATATCACCCTGCAGCCCAAGGCCGGTTACTTACTGAAGCTAAGCAGGGCTGAGCCTGGTCAGTACCTGGATGGGAGACCACATGTGAAAGCTAGGTTGCTGTTGGAAGTG
845		4	26168627	26168761	minus	TGCCACAGCCATATCACCCTGCAGCCCAAGACCGGTTACTCACTGAAGCTAATTAGGGCTGAGCCTGGTCAGTACCTGGATTGGAGACCACTAGGGAACACTAGGTTGCTGTTGGAAGTGGTGTTAGTGAGGCCA
846		4	26417948	26418065	minus	TCCGGCAGCAGCTAGCTCTCTGCAACTCTCACGTGGTTGCCCACTGAAGCTAAGCAGGACTGTGCCTGATCAGTACTTGAATGGGAGACCACATGGGAAAGCTAGGTTGCTGCCAGAA
847		4	26581504	26581623	plus	AAAGCTATATAACCCTGCAGCCCAAGACCAGTTACTCACTGAAGCTAAGCAGGGCTGAGCCTTGCTAGTAGCTGGATGGGAGACCACATGGAAAAACTAGGTTGCTGTTGGAAGTGGTGT
848		4	27151891	27152015	minus	AGCCACAGTCATATCACCCTGCAGCCCATGCATGATAGGTTACTTACTGAAGCTGAGCAGGGCTGAGACTGGTTTGAACCTGAATGGGAGACCACATGGGGGAAAAAACTAGATTGCTGTTGGAA
849		4	27661290	27661400	minus	GCAGGCTAGCTTTCTGCAACTCTCTCATGCTCACTCATTGAAGCTAAGCAGAGCTACGCCTGGTCAGTATCTGGATGGGAGACCACATGGGAAAGCTATTGCTGCCGGAAA
850		4	27668803	27668911	plus	TAGATCCCTGCAACTTTCACATGGTCACTCACTGAAGCTAAACAGTGCTGTGCCCTGCCCGGTCAGAACCTGGATGAGAGACCACATGGGAAAGCTATTGCTGCCGGAA
851		4	27693235	27693346	minus	AGCAAACATCACCCTGCAGCCCAAGACCGGCTACTCACTGAAGCTAAGCAGGGCTAAGCCTGGTCAGTACCTGGATGGGAGACCACGTGGGAAAAGTAGATTGCTGCTAGAA
852		4	27893146	27893247	minus	GCTGGCAGCAAGCTCTCTGCAACTCTTAAATGGTTGTCCTTTGAAGCTAAGCAGGGCTGTGCCTGGTCAGTATCTGGATGGGAGACCACATGGTAAAGCTAG
853		4	28077899	28078013	minus	TGCCACAGCCATATCACCCTGCAGCCCAAGACCAGTTACTCATTGAAGCTAAGCTGAGCCTGGTCAGTACCTGGATTGAAGACCACATGGGAAAAAAACTAGGTTGCTGCTGGAA
854		4	28443043	28443156	minus	CCACAGCCATATCACCCTGCAGTCCAAGACTGGTTACTCACCGAAGCTAAGCAGAGCTGAGCCTGGTCAGTACCTGGATAAGCGACCACATGGGAAACTAAATTGCTGTTGGAA
855		4	28552418	28552539	minus	TAATCTAGCTGGCAGCTAGCTCTCTGCGACTCTCACATGGTTGCCCACTGAAGCTAAGAAGAGCTGAGCCCGGTCAGTACTTGGATGGGAGACCACATGGGAAAGCTAGGTTGCTGTCGGAA
856		4	28813997	28814117	minus	CTAAACGGCAGCTAGCTCTCTGCAACTCTCACATGGTCGCCCACTGAAGCTAAGCAGGGCTGCGCCCGGTCAGTACCTGGATGGGAGACCACATGGGAAAGCTAGGTTGCTGCCGGAAGTG
857		4	28909850	28909967	minus	CTTATGGCCATACCACCCTGGCAATACCCGATCTCATCTGAACTCGGAAGTAAAGCGGGGTTGGGCCTGGTTAGTACTTGGATGGGAGACCGCCTGGGAATATCAGGTGCTGTAAGCT
858		4	31078595	31078707	plus	GTAGCCGGCAGCTAGCTCTCTGCAACTCTCACATGGTCACCCACTGCAGCTAAGCAGGGTTGCACCCGGTCCGTACCTGGAGACCACATGGGAAAGCTAGGTTGTTGCTGGAA
859		4	32199486	32199604	minus	GCTTACGGCCATACCACCCTGGCAATGCCCGATCTCATCTGAACTCGGAAGTAAAGCAGGGTGGGGCCTGGTTAGTACTTGGATGGGAGACCGCCTGGCAATACCAGGTGCTGTAAGCT
860		4	32597339	32597457	minus	GCTTACGGCCATACCACCCTGGAAATGCCCGATCTCATCTGAACTCGGAAGTAAAGCAGGGTCGGGCCTGGTTAGTACTTGGATGGGAGACCGCCTGGGAATGCCAGGTGCTGTAAGCT
861	seq1	4	32602514	32602632	minus	GCTTACGGCCATACCACCCTGGAAATGCCCGATCTCATCTGAACTCGGAAGTAAAGCAGGGTCGGGCCTGGTTAGTACTTGGATGGGAGACCGCCTGGGAATACCAGGTGCTGTAAGCT
862		4	32602811	32602928	minus	CTTACGGCCATACCACCCTGGAAATGCCCGATCTCATCTGAACTCGGAAGTAAAGCAGGGTCGGGCCTGGTTAGTACTTGGATGGGAGACCGCCTGGGAATACCAGGTGCTGTAAGCT
863		4	32603109	32603226	minus	CTTACGGCCATACCACCCTGGAAATGCCCGATCTCATCTGAACTCGGAAGTAAAGCAGGGTCGGGCCTGGTTAGTACTTGGATGGGAGACCGCCTGGGAATACCAGGTGCTGTAAGCT
864		4	32603407	32603525	minus	GCTTACGGCCATACCACCCTGGAAATGCCCGATCTCAGCTGAACTCGGAAGTAAAGCAGGGTCGGGCCTGGTTAGTACTTGGATGGGAGACCGCCTGGGAATACCAGGTGCTGTAAGCT
865	seq3	4	32603584	32603702	minus	GCTTACGGCCATACCACCCTGGAAATGCCCGATCTCATCTGAACTCGGAAGTAAAGCAGGGTCGGGCCTGGTTAGTACTTGGATGGGAGACCGCCTGGGAATACCAGGCGCTGTAAGCT
866		4	32603761	32603874	minus	GCTTACGGCCATACCACCCTGGAAATGCCCGATCTCATCTGAACTCGGAAGCAGGGTCGGGCCTGGTTAGTACTTGGATGGGAGACCGCCTGGGAATACCAGGTGCTGTAAGCT
867		4	32603933	32604046	minus	GCTTACGGCCATACCACCCTGGAAATGCCCGATCTCATCTGAACTCGGAAGCAGGGTCGGGCCTGGTTAGTACTTGGATGGGAGACCGCCTGGGAATACCAGGTGCTGTAAGCT
868	seq1	4	32604105	32604223	minus	GCTTACGGCCATACCACCCTGGAAATGCCCGATCTCATCTGAACTCGGAAGTAAAGCAGGGTCGGGCCTGGTTAGTACTTGGATGGGAGACCGCCTGGGAATACCAGGTGCTGTAAGCT
869		4	32604282	32604400	minus	GCTTACGGCCATACCACCCTGGAAATGCCCGATGTCATCTGAACTCGGAAGTAAAGCAGGGTCGGGCCTGGTTAGTACTTGGATGGCAGACCGCCTGGGAATACCAGGCGCTGTAAGCT
870	seq4	4	32604459	32604577	minus	GCTTACGGCCATACCACCCTGGAAATGCCCGATCTCATCTGAACTCGGAAGTAAAGCAGGGTCGGGCCTGGTTAGTACTTGGATGGGAGACCGCCTGGGAATACCAGTTGCTGTAAGCT
871	seq5	4	32604636	32604754	minus	GCTTACGGCCATACCACCCTGGAAATGCCCGATCTCATCTGAACTCGGAAGTAAAGCAGGGTCGGGGCTGGTTAGTACTTGGATGGGAGACCGCCTGGGAATACCAGGTGCTGTAAGCT
872	seq6	4	32604813	32604931	minus	ACTTACGGCCATACCACCCTGGAAATGCCCGATCTCATCTGAACTCGGAAGTAAAGCAGGGTCGGGCCTGGTTAGTACTTGGATGGGAGACCGCCTGGGAATACCAGGTGCTGTAAGCT
873		4	32604990	32605108	minus	GCTTACGGCCATACCACCCTGGAAATGCCCGATGTCATCTGAACTCGGAAGTAAAGCAGGGTCGGGCCTGGTTAGTACTTGGATGGGAGACCGCCTGGGAATACCAGGTGCTGTAAGCT
874		4	32605167	32605285	minus	GCTTACGGCCATACCACCCTGGAAATGCCCGATCTCATCTGAACTCGGAAGTAAAGCAGGGTCGTGCCTGGTTAGTACTTGGATGGGAGACCGCCTGGGAATACCAGGCGCTGTAAGCT
875		4	32611073	32611191	minus	GCTTACGGCCATACCACCCTGGAAATGCCCGATGTCATCTGAACTCGGAAGTAAAGCAGGGTCGGGCCTGGTTAGTACTTGGATGGGAGACCGCCTGGGAAAACCAGGTGCTGTAAGCT
876		4	32611250	32611368	minus	GCTTACGGCCATACCACCCTGGAAATGCCCGATCTCATCTGAACTCGGAAGTAAAGCAGGGTCGGGCCTGGTTAGTACTTGGATGGGAGACCGCCTGGGAATACCAGGCACTGTAAGCT
877		4	32611427	32611545	minus	GCTTACGGCCATACCACCCTGGAAATGCCCGATGTCATCTGAACTCGGAAGTAAAGCAGGGTCGGGCCTGGTTAGTATTTGGATGGGAGACTGCCTGGGAATACCAGGTGCTGTAAGCT
878	seq1	4	32611604	32611722	minus	GCTTACGGCCATACCACCCTGGAAATGCCCGATCTCATCTGAACTCGGAAGTAAAGCAGGGTCGGGCCTGGTTAGTACTTGGATGGGAGACCGCCTGGGAATACCAGGTGCTGTAAGCT
879		4	32611781	32611892	minus	AAAAAAAAAGAAAAGAAATGCCCGATCTCATCTGAACTCGGAAGTAAAGCAGGGTCGGGCCTGGTTAGTACTTGGATGGGAGACCGCCTGGGAATACCAGGTGCTGTAAGCT
880		4	32792471	32792577	plus	CAGCCGGCAGCTAGCTCTCTGCAACTCTCACATGGCCGCCCACTGAAGCACTGCGCCTGGTCAGTACCTGGATGGGAGACCACATGGGAAAGCTAGGTTGCTGCTAA
881	seq1	4	33032926	33033044	minus	GCTTACGGCCATACCACCCTGGAAATGCCCGATCTCATCTGAACTCGGAAGTAAAGCAGGGTCGGGCCTGGTTAGTACTTGGATGGGAGACCGCCTGGGAATACCAGGTGCTGTAAGCT
882	seq1	4	33033103	33033221	minus	GCTTACGGCCATACCACCCTGGAAATGCCCGATCTCATCTGAACTCGGAAGTAAAGCAGGGTCGGGCCTGGTTAGTACTTGGATGGGAGACCGCCTGGGAATACCAGGTGCTGTAAGCT
883	seq1	4	33033280	33033398	minus	GCTTACGGCCATACCACCCTGGAAATGCCCGATCTCATCTGAACTCGGAAGTAAAGCAGGGTCGGGCCTGGTTAGTACTTGGATGGGAGACCGCCTGGGAATACCAGGTGCTGTAAGCT
884	seq1	4	33033457	33033575	minus	GCTTACGGCCATACCACCCTGGAAATGCCCGATCTCATCTGAACTCGGAAGTAAAGCAGGGTCGGGCCTGGTTAGTACTTGGATGGGAGACCGCCTGGGAATACCAGGTGCTGTAAGCT
885		4	33102464	33102582	minus	GCTTACGGCCATACCACCCTGCAAATGCCCGCTCTCATCTGAACTCGGAAGTAAATCAGGGTCGGGCCTGGTTAGTACTTGGATGGGAGACTGCCCGGGAATACGAGGTGCTGTAAGCT
886		4	33102761	33102879	minus	GCTTACGGCCATACCACCCTGCAAATGCCCGCTCTCATCTGAAATCGGAAGTAAATCAGGGTCGGGCCTGGTTAGTACTTGGATGGGAGACCGCCTGGGAATACCAGGTGCTGTAAGCT
887		4	33103058	33103176	minus	GCTTACGGCCATACCACCCTGCAAATGCCCGCTCTCATCTGAACTCGGAAGTAAAGCAGGGTCGGGCCTGGTTAGTACTTGGATGGGAGACCGCCTGGGAATACCAGGTGCTGTAAGCT
888		4	33103355	33103473	minus	GCTTACGGCCATACCACCCTGGAAATGCCCGCTCTCATCTGAACTCGGAAGTAAATCAGGGTCGGGCCTGGTTAGTACTTGGATGGGAGACCGCCTGGGAATACCAGGTGCTGTAAGCT
889		4	33316170	33316293	minus	TGCCACAGCCATGTCACCCTGCAGCCCAAGACCGGTTACTCACTGAAGCTAAGCAGGGCTGAGCCTGGTCAGTACCTGGATGGGAGACCACTAGGGAACACTAGGTTGCTGTTGGAAGTGGTGT
890		4	33655256	33655376	minus	AACAGCCATATCACCCTGCAGCCCAAGACCGGTTACTCCCTGAAGCTAAGCAGGGCTGAGCCTGACCAGTACCTGGCTGTGAGACCACATGGGAAAACGAGGTTGCTGTTGGAAGTGGTGT
891		4	33882021	33882125	plus	CACCCTGGTAATGCCCGATCTCATCTGAACTCGGAAGTAAAGCGGGGTCAGGCCTGGTTAGTACTTGGATGGGAGACCGCCTGGGAATACCAGGTGCTGTAAGCT
892		4	34266281	34266389	plus	AGCTGGCAGCTAGCTCTCTGCAACTCTCACATGGCTGCCCACTGAAGCTAAGCAGGGTCAGTACCTGGATGGGAGACCACATGGGAAAGCTAGGTTGCTGCTGGAAGTG
893	seq1	4	34597452	34597570	plus	GCTTACGGCCATACCACCCTGGAAATGCCCGATCTCATCTGAACTCGGAAGTAAAGCAGGGTCGGGCCTGGTTAGTACTTGGATGGGAGACCGCCTGGGAATACCAGGTGCTGTAAGCT
894		4	34603290	34603402	plus	AAAAAAAAAAAAATGGAAATGCCCGATCTCATCTGAACTCGGAAGTAAAGCAGGGTCGGGCCTGGTTAGTACTTGGATGGGAGACCGCCTGGGAATACCAGGTGCTGTAAGCT
895	seq1	4	34603461	34603579	plus	GCTTACGGCCATACCACCCTGGAAATGCCCGATCTCATCTGAACTCGGAAGTAAAGCAGGGTCGGGCCTGGTTAGTACTTGGATGGGAGACCGCCTGGGAATACCAGGTGCTGTAAGCT
896	seq1	4	34603638	34603756	plus	GCTTACGGCCATACCACCCTGGAAATGCCCGATCTCATCTGAACTCGGAAGTAAAGCAGGGTCGGGCCTGGTTAGTACTTGGATGGGAGACCGCCTGGGAATACCAGGTGCTGTAAGCT
897	seq1	4	34603815	34603933	plus	GCTTACGGCCATACCACCCTGGAAATGCCCGATCTCATCTGAACTCGGAAGTAAAGCAGGGTCGGGCCTGGTTAGTACTTGGATGGGAGACCGCCTGGGAATACCAGGTGCTGTAAGCT
898	seq1	4	34603992	34604110	plus	GCTTACGGCCATACCACCCTGGAAATGCCCGATCTCATCTGAACTCGGAAGTAAAGCAGGGTCGGGCCTGGTTAGTACTTGGATGGGAGACCGCCTGGGAATACCAGGTGCTGTAAGCT
899	seq1	4	34604169	34604287	plus	GCTTACGGCCATACCACCCTGGAAATGCCCGATCTCATCTGAACTCGGAAGTAAAGCAGGGTCGGGCCTGGTTAGTACTTGGATGGGAGACCGCCTGGGAATACCAGGTGCTGTAAGCT
900	seq1	4	34604346	34604464	plus	GCTTACGGCCATACCACCCTGGAAATGCCCGATCTCATCTGAACTCGGAAGTAAAGCAGGGTCGGGCCTGGTTAGTACTTGGATGGGAGACCGCCTGGGAATACCAGGTGCTGTAAGCT
901	seq1	4	34604523	34604641	plus	GCTTACGGCCATACCACCCTGGAAATGCCCGATCTCATCTGAACTCGGAAGTAAAGCAGGGTCGGGCCTGGTTAGTACTTGGATGGGAGACCGCCTGGGAATACCAGGTGCTGTAAGCT
902		4	34604700	34604818	plus	GCTTATGGCCATACCACCCTGGAAATGCCCGATCTCATCTGAACTCGGAAGTAAAGCAGGGTCGGGCCTGGTTAGTACTTAGATGGGAGACCGCCTGGGAATACCAGGTGCTGTAAGCT
903	seq1	4	34604877	34604995	plus	GCTTACGGCCATACCACCCTGGAAATGCCCGATCTCATCTGAACTCGGAAGTAAAGCAGGGTCGGGCCTGGTTAGTACTTGGATGGGAGACCGCCTGGGAATACCAGGTGCTGTAAGCT
904		4	34605054	34605172	plus	GCTTACGGCCATACCACCCTGTAAATGCCCGATCTCATCTGAACTCGGAAGTAAAGCAGGGTCGGACCTGGTTAGTACTTGGATGGGAGACCGCCTGGGAATACCAGGTGCTGTAAGCT
905	seq1	4	34605231	34605349	plus	GCTTACGGCCATACCACCCTGGAAATGCCCGATCTCATCTGAACTCGGAAGTAAAGCAGGGTCGGGCCTGGTTAGTACTTGGATGGGAGACCGCCTGGGAATACCAGGTGCTGTAAGCT
906	seq1	4	34605408	34605526	plus	GCTTACGGCCATACCACCCTGGAAATGCCCGATCTCATCTGAACTCGGAAGTAAAGCAGGGTCGGGCCTGGTTAGTACTTGGATGGGAGACCGCCTGGGAATACCAGGTGCTGTAAGCT
907	seq7	4	34605585	34605703	plus	GCTTACGGCCATACCACCCTGGAAATGCCCAATCTCATCTGAACTCGGAAGTAAAGCAGGGTCGGGCCTGGTTAGTACTTGGATGGGAGACCGCCTGGGAATACCAGGTGCTGTAAGCT
908	seq1	4	34605762	34605880	plus	GCTTACGGCCATACCACCCTGGAAATGCCCGATCTCATCTGAACTCGGAAGTAAAGCAGGGTCGGGCCTGGTTAGTACTTGGATGGGAGACCGCCTGGGAATACCAGGTGCTGTAAGCT
909	seq1	4	34605939	34606057	plus	GCTTACGGCCATACCACCCTGGAAATGCCCGATCTCATCTGAACTCGGAAGTAAAGCAGGGTCGGGCCTGGTTAGTACTTGGATGGGAGACCGCCTGGGAATACCAGGTGCTGTAAGCT
910	seq1	4	34606116	34606234	plus	GCTTACGGCCATACCACCCTGGAAATGCCCGATCTCATCTGAACTCGGAAGTAAAGCAGGGTCGGGCCTGGTTAGTACTTGGATGGGAGACCGCCTGGGAATACCAGGTGCTGTAAGCT
911	seq7	4	34606293	34606411	plus	GCTTACGGCCATACCACCCTGGAAATGCCCAATCTCATCTGAACTCGGAAGTAAAGCAGGGTCGGGCCTGGTTAGTACTTGGATGGGAGACCGCCTGGGAATACCAGGTGCTGTAAGCT
912	seq8	4	34606470	34606588	plus	GCTTACGGCCATACCACCCTGGAAATGCCCGATCTCATCTGAACTCGGAAGTAAAGCAGGGTCGGGCCTGGTTAGTACTTGGATGGGAGACCGCCTGGGAATACCAGGTGTTGTAAGCT
913	seq1	4	34606647	34606765	plus	GCTTACGGCCATACCACCCTGGAAATGCCCGATCTCATCTGAACTCGGAAGTAAAGCAGGGTCGGGCCTGGTTAGTACTTGGATGGGAGACCGCCTGGGAATACCAGGTGCTGTAAGCT
914	seq9	4	34606824	34606942	plus	GCTTACGGCCATACCACCCTGGAAATGCCCGATCTCATCTGAACTCGGAAGTAAAGCAGGGTCGGACCTGGTTAGTACTTGGATGGGAGACCGCCTGGGAATACCAGGTGCTGTAAGCT
915	seq7	4	34607001	34607119	plus	GCTTACGGCCATACCACCCTGGAAATGCCCAATCTCATCTGAACTCGGAAGTAAAGCAGGGTCGGGCCTGGTTAGTACTTGGATGGGAGACCGCCTGGGAATACCAGGTGCTGTAAGCT
916	seq1	4	34607178	34607296	plus	GCTTACGGCCATACCACCCTGGAAATGCCCGATCTCATCTGAACTCGGAAGTAAAGCAGGGTCGGGCCTGGTTAGTACTTGGATGGGAGACCGCCTGGGAATACCAGGTGCTGTAAGCT
917	seq1	4	34607355	34607473	plus	GCTTACGGCCATACCACCCTGGAAATGCCCGATCTCATCTGAACTCGGAAGTAAAGCAGGGTCGGGCCTGGTTAGTACTTGGATGGGAGACCGCCTGGGAATACCAGGTGCTGTAAGCT
918	seq1	4	34607532	34607650	plus	GCTTACGGCCATACCACCCTGGAAATGCCCGATCTCATCTGAACTCGGAAGTAAAGCAGGGTCGGGCCTGGTTAGTACTTGGATGGGAGACCGCCTGGGAATACCAGGTGCTGTAAGCT
919	seq1	4	34607709	34607827	plus	GCTTACGGCCATACCACCCTGGAAATGCCCGATCTCATCTGAACTCGGAAGTAAAGCAGGGTCGGGCCTGGTTAGTACTTGGATGGGAGACCGCCTGGGAATACCAGGTGCTGTAAGCT
920	seq9	4	34607886	34608004	plus	GCTTACGGCCATACCACCCTGGAAATGCCCGATCTCATCTGAACTCGGAAGTAAAGCAGGGTCGGACCTGGTTAGTACTTGGATGGGAGACCGCCTGGGAATACCAGGTGCTGTAAGCT
921	seq7	4	34608063	34608181	plus	GCTTACGGCCATACCACCCTGGAAATGCCCAATCTCATCTGAACTCGGAAGTAAAGCAGGGTCGGGCCTGGTTAGTACTTGGATGGGAGACCGCCTGGGAATACCAGGTGCTGTAAGCT
922	seq1	4	34608240	34608358	plus	GCTTACGGCCATACCACCCTGGAAATGCCCGATCTCATCTGAACTCGGAAGTAAAGCAGGGTCGGGCCTGGTTAGTACTTGGATGGGAGACCGCCTGGGAATACCAGGTGCTGTAAGCT
923	seq1	4	34608417	34608535	plus	GCTTACGGCCATACCACCCTGGAAATGCCCGATCTCATCTGAACTCGGAAGTAAAGCAGGGTCGGGCCTGGTTAGTACTTGGATGGGAGACCGCCTGGGAATACCAGGTGCTGTAAGCT
924	seq1	4	34608594	34608712	plus	GCTTACGGCCATACCACCCTGGAAATGCCCGATCTCATCTGAACTCGGAAGTAAAGCAGGGTCGGGCCTGGTTAGTACTTGGATGGGAGACCGCCTGGGAATACCAGGTGCTGTAAGCT
925	seq1	4	34608771	34608889	plus	GCTTACGGCCATACCACCCTGGAAATGCCCGATCTCATCTGAACTCGGAAGTAAAGCAGGGTCGGGCCTGGTTAGTACTTGGATGGGAGACCGCCTGGGAATACCAGGTGCTGTAAGCT
926	seq1	4	34608948	34609066	plus	GCTTACGGCCATACCACCCTGGAAATGCCCGATCTCATCTGAACTCGGAAGTAAAGCAGGGTCGGGCCTGGTTAGTACTTGGATGGGAGACCGCCTGGGAATACCAGGTGCTGTAAGCT
927	seq1	4	34609125	34609243	plus	GCTTACGGCCATACCACCCTGGAAATGCCCGATCTCATCTGAACTCGGAAGTAAAGCAGGGTCGGGCCTGGTTAGTACTTGGATGGGAGACCGCCTGGGAATACCAGGTGCTGTAAGCT
928	seq1	4	34609302	34609420	plus	GCTTACGGCCATACCACCCTGGAAATGCCCGATCTCATCTGAACTCGGAAGTAAAGCAGGGTCGGGCCTGGTTAGTACTTGGATGGGAGACCGCCTGGGAATACCAGGTGCTGTAAGCT
929	seq1	4	34609479	34609597	plus	GCTTACGGCCATACCACCCTGGAAATGCCCGATCTCATCTGAACTCGGAAGTAAAGCAGGGTCGGGCCTGGTTAGTACTTGGATGGGAGACCGCCTGGGAATACCAGGTGCTGTAAGCT
930	seq10	4	34609656	34609774	plus	GCTTATGGCCATACCACCCTGGAAATGCCCGATCTCATCTGAACTCGGAAGTAAAGCAGGGTCGGGCCTGGTTAGTACTTGGATGGGAGACCGCCTGGGAATACCAGGTGCTGTAAGCT
931	seq11	4	34609833	34609951	plus	GCTTACGGCCATACCACCCTGGAAATGCCCGATCTCATCTGATCTCGGAAGTAAAGCAGGGTCGGGCCTGGTTAGTACTTGGATGGGAGACCGCCTGGGAATACCAGGTGCTGTAAGCT
932	seq1	4	34610010	34610128	plus	GCTTACGGCCATACCACCCTGGAAATGCCCGATCTCATCTGAACTCGGAAGTAAAGCAGGGTCGGGCCTGGTTAGTACTTGGATGGGAGACCGCCTGGGAATACCAGGTGCTGTAAGCT
933	seq1	4	34610187	34610305	plus	GCTTACGGCCATACCACCCTGGAAATGCCCGATCTCATCTGAACTCGGAAGTAAAGCAGGGTCGGGCCTGGTTAGTACTTGGATGGGAGACCGCCTGGGAATACCAGGTGCTGTAAGCT
934	seq1	4	34610364	34610482	plus	GCTTACGGCCATACCACCCTGGAAATGCCCGATCTCATCTGAACTCGGAAGTAAAGCAGGGTCGGGCCTGGTTAGTACTTGGATGGGAGACCGCCTGGGAATACCAGGTGCTGTAAGCT
935		4	34610541	34610659	plus	GCTTACGGCCGTACCACCCTGGAAATGCCCGATCTCATCTGATCTCGGAAGTAAAGCAGGGTCGGGCCTGGTTAGTACTTGGATGGGAGACCGCCTGGGAATACCAGGTGCTGTAAGCT
936	seq7	4	34610718	34610836	plus	GCTTACGGCCATACCACCCTGGAAATGCCCAATCTCATCTGAACTCGGAAGTAAAGCAGGGTCGGGCCTGGTTAGTACTTGGATGGGAGACCGCCTGGGAATACCAGGTGCTGTAAGCT
937	seq10	4	34610895	34611013	plus	GCTTATGGCCATACCACCCTGGAAATGCCCGATCTCATCTGAACTCGGAAGTAAAGCAGGGTCGGGCCTGGTTAGTACTTGGATGGGAGACCGCCTGGGAATACCAGGTGCTGTAAGCT
938	seq7	4	34611072	34611190	plus	GCTTACGGCCATACCACCCTGGAAATGCCCAATCTCATCTGAACTCGGAAGTAAAGCAGGGTCGGGCCTGGTTAGTACTTGGATGGGAGACCGCCTGGGAATACCAGGTGCTGTAAGCT
939	seq1	4	34611249	34611367	plus	GCTTACGGCCATACCACCCTGGAAATGCCCGATCTCATCTGAACTCGGAAGTAAAGCAGGGTCGGGCCTGGTTAGTACTTGGATGGGAGACCGCCTGGGAATACCAGGTGCTGTAAGCT
940	seq1	4	34611426	34611544	plus	GCTTACGGCCATACCACCCTGGAAATGCCCGATCTCATCTGAACTCGGAAGTAAAGCAGGGTCGGGCCTGGTTAGTACTTGGATGGGAGACCGCCTGGGAATACCAGGTGCTGTAAGCT
941	seq10	4	34611603	34611721	plus	GCTTATGGCCATACCACCCTGGAAATGCCCGATCTCATCTGAACTCGGAAGTAAAGCAGGGTCGGGCCTGGTTAGTACTTGGATGGGAGACCGCCTGGGAATACCAGGTGCTGTAAGCT
942	seq11	4	34611780	34611898	plus	GCTTACGGCCATACCACCCTGGAAATGCCCGATCTCATCTGATCTCGGAAGTAAAGCAGGGTCGGGCCTGGTTAGTACTTGGATGGGAGACCGCCTGGGAATACCAGGTGCTGTAAGCT
943	seq1	4	34611957	34612075	plus	GCTTACGGCCATACCACCCTGGAAATGCCCGATCTCATCTGAACTCGGAAGTAAAGCAGGGTCGGGCCTGGTTAGTACTTGGATGGGAGACCGCCTGGGAATACCAGGTGCTGTAAGCT
944	seq10	4	34612134	34612252	plus	GCTTATGGCCATACCACCCTGGAAATGCCCGATCTCATCTGAACTCGGAAGTAAAGCAGGGTCGGGCCTGGTTAGTACTTGGATGGGAGACCGCCTGGGAATACCAGGTGCTGTAAGCT
945	seq1	4	34612311	34612429	plus	GCTTACGGCCATACCACCCTGGAAATGCCCGATCTCATCTGAACTCGGAAGTAAAGCAGGGTCGGGCCTGGTTAGTACTTGGATGGGAGACCGCCTGGGAATACCAGGTGCTGTAAGCT
946	seq10	4	34612488	34612606	plus	GCTTATGGCCATACCACCCTGGAAATGCCCGATCTCATCTGAACTCGGAAGTAAAGCAGGGTCGGGCCTGGTTAGTACTTGGATGGGAGACCGCCTGGGAATACCAGGTGCTGTAAGCT
947		4	34612665	34612783	plus	GCTTACGGCCATACTACCCTGGAAATGCCCGATCTCATCTGATCTCGGAAGTAAAGCAGGGTCGGGCCTGGTTAGTACTTGGATGGGAGACCGCCTGGGAATACCAGGTGCTGTAAGCT
948	seq7	4	34612842	34612960	plus	GCTTACGGCCATACCACCCTGGAAATGCCCAATCTCATCTGAACTCGGAAGTAAAGCAGGGTCGGGCCTGGTTAGTACTTGGATGGGAGACCGCCTGGGAATACCAGGTGCTGTAAGCT
949	seq1	4	34613019	34613137	plus	GCTTACGGCCATACCACCCTGGAAATGCCCGATCTCATCTGAACTCGGAAGTAAAGCAGGGTCGGGCCTGGTTAGTACTTGGATGGGAGACCGCCTGGGAATACCAGGTGCTGTAAGCT
950	seq1	4	34613196	34613314	plus	GCTTACGGCCATACCACCCTGGAAATGCCCGATCTCATCTGAACTCGGAAGTAAAGCAGGGTCGGGCCTGGTTAGTACTTGGATGGGAGACCGCCTGGGAATACCAGGTGCTGTAAGCT
951	seq7	4	34613373	34613491	plus	GCTTACGGCCATACCACCCTGGAAATGCCCAATCTCATCTGAACTCGGAAGTAAAGCAGGGTCGGGCCTGGTTAGTACTTGGATGGGAGACCGCCTGGGAATACCAGGTGCTGTAAGCT
952	seq1	4	34613550	34613668	plus	GCTTACGGCCATACCACCCTGGAAATGCCCGATCTCATCTGAACTCGGAAGTAAAGCAGGGTCGGGCCTGGTTAGTACTTGGATGGGAGACCGCCTGGGAATACCAGGTGCTGTAAGCT
953	seq1	4	34613727	34613845	plus	GCTTACGGCCATACCACCCTGGAAATGCCCGATCTCATCTGAACTCGGAAGTAAAGCAGGGTCGGGCCTGGTTAGTACTTGGATGGGAGACCGCCTGGGAATACCAGGTGCTGTAAGCT
954		4	34613904	34614022	plus	GCTTATGGCCATACCACCCTGGAAATGCCCGATCTCATCTGAACTCGGAAGTAAAGCAGGGTCGGGCCTGGTTAGTACTTAGATGGGAGACCGCCTGGGAATACCAGGTGCTGTAAGCT
955		4	34614081	34614199	plus	GCTTACGGCCGTACCACCCTGGAAATGCCCGATCTCATCTGATCTCGGAAGTAAAGCAGGGTCGGGCCTGGTTAGTACTTGGATGGGAGACCGCCTGGGAATACCAGGTGCTGTAAGCT
956	seq1	4	34614258	34614376	plus	GCTTACGGCCATACCACCCTGGAAATGCCCGATCTCATCTGAACTCGGAAGTAAAGCAGGGTCGGGCCTGGTTAGTACTTGGATGGGAGACCGCCTGGGAATACCAGGTGCTGTAAGCT
957	seq10	4	34614435	34614553	plus	GCTTATGGCCATACCACCCTGGAAATGCCCGATCTCATCTGAACTCGGAAGTAAAGCAGGGTCGGGCCTGGTTAGTACTTGGATGGGAGACCGCCTGGGAATACCAGGTGCTGTAAGCT
958		4	34614612	34614730	plus	GCTTACGGCCATACTACCCTGGAAATGCCCGATCTCATCTGATCTCGGAAGTAAAGCAGGGTCGGGCCTGGTTAGTACTTGGATGGGAGACCGCCTGGGAATACCAGGTGCTGTAAGCT
959	seq7	4	34614789	34614907	plus	GCTTACGGCCATACCACCCTGGAAATGCCCAATCTCATCTGAACTCGGAAGTAAAGCAGGGTCGGGCCTGGTTAGTACTTGGATGGGAGACCGCCTGGGAATACCAGGTGCTGTAAGCT
960	seq1	4	34614966	34615084	plus	GCTTACGGCCATACCACCCTGGAAATGCCCGATCTCATCTGAACTCGGAAGTAAAGCAGGGTCGGGCCTGGTTAGTACTTGGATGGGAGACCGCCTGGGAATACCAGGTGCTGTAAGCT
961	seq1	4	34615143	34615261	plus	GCTTACGGCCATACCACCCTGGAAATGCCCGATCTCATCTGAACTCGGAAGTAAAGCAGGGTCGGGCCTGGTTAGTACTTGGATGGGAGACCGCCTGGGAATACCAGGTGCTGTAAGCT
962	seq1	4	34615320	34615438	plus	GCTTACGGCCATACCACCCTGGAAATGCCCGATCTCATCTGAACTCGGAAGTAAAGCAGGGTCGGGCCTGGTTAGTACTTGGATGGGAGACCGCCTGGGAATACCAGGTGCTGTAAGCT
963	seq1	4	34615497	34615615	plus	GCTTACGGCCATACCACCCTGGAAATGCCCGATCTCATCTGAACTCGGAAGTAAAGCAGGGTCGGGCCTGGTTAGTACTTGGATGGGAGACCGCCTGGGAATACCAGGTGCTGTAAGCT
964	seq1	4	34615674	34615792	plus	GCTTACGGCCATACCACCCTGGAAATGCCCGATCTCATCTGAACTCGGAAGTAAAGCAGGGTCGGGCCTGGTTAGTACTTGGATGGGAGACCGCCTGGGAATACCAGGTGCTGTAAGCT
965	seq1	4	34615851	34615969	plus	GCTTACGGCCATACCACCCTGGAAATGCCCGATCTCATCTGAACTCGGAAGTAAAGCAGGGTCGGGCCTGGTTAGTACTTGGATGGGAGACCGCCTGGGAATACCAGGTGCTGTAAGCT
966	seq1	4	34616028	34616146	plus	GCTTACGGCCATACCACCCTGGAAATGCCCGATCTCATCTGAACTCGGAAGTAAAGCAGGGTCGGGCCTGGTTAGTACTTGGATGGGAGACCGCCTGGGAATACCAGGTGCTGTAAGCT
967	seq1	4	34616205	34616323	plus	GCTTACGGCCATACCACCCTGGAAATGCCCGATCTCATCTGAACTCGGAAGTAAAGCAGGGTCGGGCCTGGTTAGTACTTGGATGGGAGACCGCCTGGGAATACCAGGTGCTGTAAGCT
968	seq1	4	34616382	34616500	plus	GCTTACGGCCATACCACCCTGGAAATGCCCGATCTCATCTGAACTCGGAAGTAAAGCAGGGTCGGGCCTGGTTAGTACTTGGATGGGAGACCGCCTGGGAATACCAGGTGCTGTAAGCT
969	seq1	4	34616559	34616677	plus	GCTTACGGCCATACCACCCTGGAAATGCCCGATCTCATCTGAACTCGGAAGTAAAGCAGGGTCGGGCCTGGTTAGTACTTGGATGGGAGACCGCCTGGGAATACCAGGTGCTGTAAGCT
970		4	34616736	34616854	plus	GCTTATGGCCATACCACCCTGGAAATGCCCGATCTCATCTGAACTCGGAAGTAAAGCAGGGTCGGGCCTGGTTAGTACTTAGATGGGAGACCGCCTGGGAATACCAGGTGCTGTAAGCT
971		4	34616913	34617031	plus	GCTTACGGCCGTACCACCCTGGAAATGCCCGATCTCATCTGATCTCGGAAGTAAAGCAGGGTCGGGCCTGGTTAGTACTTGGATGGGAGACCGCCTGGGAATACCAGGTGCTGTAAGCT
972	seq1	4	34896350	34896468	minus	GCTTACGGCCATACCACCCTGGAAATGCCCGATCTCATCTGAACTCGGAAGTAAAGCAGGGTCGGGCCTGGTTAGTACTTGGATGGGAGACCGCCTGGGAATACCAGGTGCTGTAAGCT
973	seq1	4	34896648	34896766	minus	GCTTACGGCCATACCACCCTGGAAATGCCCGATCTCATCTGAACTCGGAAGTAAAGCAGGGTCGGGCCTGGTTAGTACTTGGATGGGAGACCGCCTGGGAATACCAGGTGCTGTAAGCT
974	seq1	4	34896946	34897064	minus	GCTTACGGCCATACCACCCTGGAAATGCCCGATCTCATCTGAACTCGGAAGTAAAGCAGGGTCGGGCCTGGTTAGTACTTGGATGGGAGACCGCCTGGGAATACCAGGTGCTGTAAGCT
975	seq1	4	34897244	34897362	minus	GCTTACGGCCATACCACCCTGGAAATGCCCGATCTCATCTGAACTCGGAAGTAAAGCAGGGTCGGGCCTGGTTAGTACTTGGATGGGAGACCGCCTGGGAATACCAGGTGCTGTAAGCT
976		4	34897542	34897660	minus	GCTTACTGCCATACCACCCTGGAAATGCCCGATCTCATCTGATCTCGGAAGTAAAGCAGGGTCGGGCCTGGTTAGTACTTGGATGGGAGACCGCCTGGGAATACCAGGTGCTGTAAGCT
977	seq1	4	34897840	34897958	minus	GCTTACGGCCATACCACCCTGGAAATGCCCGATCTCATCTGAACTCGGAAGTAAAGCAGGGTCGGGCCTGGTTAGTACTTGGATGGGAGACCGCCTGGGAATACCAGGTGCTGTAAGCT
978		4	34898138	34898256	minus	GCTTACGTCTATACCACCCTGGAAATGCCCGATCTCATCTGAACTCGGAAGTAAAGCAGGGTCGGGCCTGGTTAGTACTTAGATGGGAGACCGCCTGGGAATACCAGGTGCTGTAAGCT
979		4	34898436	34898554	minus	GCTTACGGCCATACCACCCTGGAAATGCCCGATCTCATCTGAACTCGGAAGTAAAGCAGTGTCGGGCCTGGTTAGTACTTGGATGGGAGACCGCCTGGGAATACCAGGTGCTGTAAGCT
980		4	34898734	34898846	minus	AAAAAAAAAAAAAAGGAAATGCCCGATCTCATCTGATCTCGGAAGTAAAGCAGGGTCGGGCCTGGTTAGTACTTGGATGGGTGACCGCCTGGGAATACCAGGTGCTGTAAGCT
981		4	34904374	34904492	minus	GCTTACGGCCATACCACCCTGGAAATGCCCGATCTCATCTGAACTTGGAAGTAAAGCAGGGTCGGGCCTGGTTAGTACTTGGATGGGAGACCGCCTGGGAATACCAGGTGCTGTTAGCT
982		4	34904551	34904669	minus	GCTTACGGCCATACCACCCGGGAAATGGCCGATCACATCTGAACTCGGAAGTAAAGCAGGGTCGGGCCTGGTTAGTACTTAGATGGGAGACCGCCTGGGAATACCAGGTGCTGTAAGCT
983		4	34904728	34904847	minus	GCTAACGGCCATACCACCCTGAAAATGCCCGATCTCATCTGAACTCGGAAGTAAAGCAGGGTCGGGCCTGGTTAGTACTTGGATGGGAGACCGCCTGGGAATACCAGGTGCTGTAAAGCT
984	seq12	4	34904906	34905023	minus	GCTTACGGCCATACCACCCTGGAAATGCCCGATCTCATCTGAACTCAGAAGTAAAGCAGGGTCGGGCCTGGTTAGTACTTGGATGGGAGACCGCCTGGAATACCAGGTGCTGTAAGCT
985	seq13	4	34905082	34905200	minus	GCTTACGGCCATACCACCCTGGAAATGCCTGATCTCATCTGAACTCGGAAGTAAAGCAGGGTCGGGCCTGGTTAGTACTTGGATGGGAGACCGCCTGGGAATACCAGGTGCTGTAAGCT
986	seq1	4	34905259	34905377	minus	GCTTACGGCCATACCACCCTGGAAATGCCCGATCTCATCTGAACTCGGAAGTAAAGCAGGGTCGGGCCTGGTTAGTACTTGGATGGGAGACCGCCTGGGAATACCAGGTGCTGTAAGCT
987	seq14	4	34905435	34905553	minus	GCTTACGGCCATACCACCCTGGAAATGCCCGATCTCATCTGAACTCGGAAGTAAAGCAGGGTCGGGCCTGGTTAGTACTTGGATGGGAGACCGCCTGGGAATACCAGGTGCTGTTAGCT
988		4	34905612	34905730	minus	GCTTACGGCCATACCACCCTGGAAATGCCCGATCTCCTCTGAACTCGGAAGTAAAGCAGGGTCGGGCCTGGTTAGTACTTGGATGGGAGACCGCCTGGGAATACCAGGTGCTGTAAGCT
989		4	34905789	34905907	minus	GCTTACGGCCATACCGCCCTGGAAATGCCCGATCTCATCTGAACTCGGAAGTAAAGCAGGGTCGGGCCTGGTAAGTACTTGGATGGGAGACCGCCTGGGAATACCAGGTGCTGTAAGCT
990	seq15	4	34905966	34906084	minus	GCTTACGGCCATACCACCCTGGAAATGCCCGATCTCATCTGAACTCGTAAGTAAAGCAGGGTCGGGCCTGGTTAGTACTTGGATGGGAGACCGCCTGGGAATACCAGGTGCTGTAAGCT
991		4	34906143	34906261	minus	GCTTACGGCCATACCACCCTGGAAATGCCCGATCTCCTCTGAACTCGGAAGTAAAGCAGGGTCGGGCCTGGTTAGTACTTGGATGGGAGACCGCCTGGGAATACCAGGTGCTGTAAGCT
992		4	34906320	34906438	minus	GCTTACGGCCATACCGCCCTGGAAATGCCCGATCTCATCTGAACTCGGAAGTAAAGCAGGGTCGGGCCTGGTAAGTACTTGGATGGGAGACCGCCTGGGAATACCAGGTGCTGTAAGCT
993	seq15	4	34906497	34906615	minus	GCTTACGGCCATACCACCCTGGAAATGCCCGATCTCATCTGAACTCGTAAGTAAAGCAGGGTCGGGCCTGGTTAGTACTTGGATGGGAGACCGCCTGGGAATACCAGGTGCTGTAAGCT
994		4	34906674	34906792	minus	GCTTACGGCCATACCACCCTGGAAATGCCCGATCTCCTCTGAACTCGGAAGTAAAGCAGGGTCGGGCCTGGTTAGTACTTGGATGGGAGACCGCCTGGGAATACCAGGTGCTGTAAGCT
995		4	34906851	34906969	minus	GCTTACGGCCATACCGCCCTGGAAATGCCCGATCTCATCTGAACTCGGAAGTAAAGCAGGGTCGGGCCTGGTAAGTACTTGGATGGGAGACCGCCTGGGAATACCAGGTGCTGTAAGCT
996	seq15	4	34907028	34907146	minus	GCTTACGGCCATACCACCCTGGAAATGCCCGATCTCATCTGAACTCGTAAGTAAAGCAGGGTCGGGCCTGGTTAGTACTTGGATGGGAGACCGCCTGGGAATACCAGGTGCTGTAAGCT
997		4	34907205	34907323	minus	GCTTACGGCCATACCACCCTGGAAATGCCCGATCTCCTCTGAACTCGGAAGTAAAGCAGGGTCGGGCCTGGTTAGTACTTGGATGGGAGACCGCCTGGGAATACCAGGTGCTGTAAGCT
998		4	34907382	34907500	minus	GCTTACGGCCATACCGCCCTGGAAATGCCCGATCTCATCTGAACTCGGAAGTAAAGCAGGGTCGGGCCTGGTAAGTACTTGGATGGGAGACCGCCTGGGAATACCAGGTGCTGTAAGCT
999	seq15	4	34907559	34907677	minus	GCTTACGGCCATACCACCCTGGAAATGCCCGATCTCATCTGAACTCGTAAGTAAAGCAGGGTCGGGCCTGGTTAGTACTTGGATGGGAGACCGCCTGGGAATACCAGGTGCTGTAAGCT
1000		4	34907736	34907854	minus	GCTTACGGCCATACCACCCTGGAAATGCCCGATCTCCTCTGAACTCGGAAGTAAAGCAGGGTCGGGCCTGGTTAGTACTTGGATGGGAGACCGCCTGGGAATACCAGGTGCTGTAAGCT
1001		4	34907913	34908031	minus	GCTTACGGCCATACCGCCCTGGAAATGCCCGATCTCATCTGAACTCGGAAGTAAAGCAGGGTCGGGCCTGGTAAGTACTTGGATGGGAGACCGCCTGGGAATACCAGGTGCTGTAAGCT
1002	seq15	4	34908090	34908208	minus	GCTTACGGCCATACCACCCTGGAAATGCCCGATCTCATCTGAACTCGTAAGTAAAGCAGGGTCGGGCCTGGTTAGTACTTGGATGGGAGACCGCCTGGGAATACCAGGTGCTGTAAGCT
1003		4	34908267	34908385	minus	GCTTACGGCCATACCACCCTGGAAATGCCCGATCTCCTCTGAACTCGGAAGTAAAGCAGGGTCGGGCCTGGTTAGTACTTGGATGGGAGACCGCCTGGGAATACCAGGTGCTGTAAGCT
1004		4	34908444	34908562	minus	GCTTACGGCCATACCGCCCTGGAAATGCCCGATCTCATCTGAACTCGGAAGTAAAGCAGGGTCGGGCCTGGTAAGTACTTGGATGGGAGACCGCCTGGGAATACCAGGTGCTGTAAGCT
1005	seq15	4	34908621	34908739	minus	GCTTACGGCCATACCACCCTGGAAATGCCCGATCTCATCTGAACTCGTAAGTAAAGCAGGGTCGGGCCTGGTTAGTACTTGGATGGGAGACCGCCTGGGAATACCAGGTGCTGTAAGCT
1006		4	34908798	34908916	minus	GCTTACGGCCATACCACCCTGGAAATGCCCGATCTCCTCTGAACTCGGAAGTAAAGCAGGGTCGGGCCTGGTTAGTACTTGGATGGGAGACCGCCTGGGAATACCAGGTGCTGTAAGCT
1007		4	34908975	34909093	minus	GCTTACGGCCATACCGCCCTGGAAATGCCCGATCTCATCTGAACTCGGAAGTAAAGCAGGGTCGGGCCTGGTAAGTACTTGGATGGGAGACCGCCTGGGAATACCAGGTGCTGTAAGCT
1008	seq15	4	34909152	34909270	minus	GCTTACGGCCATACCACCCTGGAAATGCCCGATCTCATCTGAACTCGTAAGTAAAGCAGGGTCGGGCCTGGTTAGTACTTGGATGGGAGACCGCCTGGGAATACCAGGTGCTGTAAGCT
1009		4	34909329	34909447	minus	GCTTACGGCCATACCACCCTGGAAATGCCCGATCTCCTCTGAACTCGGAAGTAAAGCAGGGTCGGGCCTGGTTAGTACTTGGATGGGAGACCGCCTGGGAATACCAGGTGCTGTAAGCT
1010		4	34909506	34909624	minus	GCTTACGGCCATACCGCCCTGGAAATGCCCGATCTCATCTGAACTCGGAAGTAAAGCAGGGTCGGGCCTGGTAAGTACTTGGATGGGAGACCGCCTGGGAATACCAGGTGCTGTAAGCT
1011	seq15	4	34909683	34909801	minus	GCTTACGGCCATACCACCCTGGAAATGCCCGATCTCATCTGAACTCGTAAGTAAAGCAGGGTCGGGCCTGGTTAGTACTTGGATGGGAGACCGCCTGGGAATACCAGGTGCTGTAAGCT
1012		4	34909860	34909978	minus	GCTTACGGCCATACCACCCTGGAAATGCCCGATCTCCTCTGAACTCGGAAGTAAAGCAGGGTCGGGCCTGGTTAGTACTTGGATGGGAGACCGCCTGGGAATACCAGGTGCTGTAAGCT
1013		4	34910037	34910155	minus	GCTTACGGCCATACCGCCCTGGAAATGCCCGATCTCATCTGAACTCGGAAGTAAAGCAGGGTCGGGCCTGGTAAGTACTTGGATGGGAGACCGCCTGGGAATACCAGGTGCTGTAAGCT
1014	seq15	4	34910214	34910332	minus	GCTTACGGCCATACCACCCTGGAAATGCCCGATCTCATCTGAACTCGTAAGTAAAGCAGGGTCGGGCCTGGTTAGTACTTGGATGGGAGACCGCCTGGGAATACCAGGTGCTGTAAGCT
1015		4	34910391	34910509	minus	GCTTACGGCCATACCACCCTGGAAATGCCCGATCTCCTCTGAACTCGGAAGTAAAGCAGGGTCGGGCCTGGTTAGTACTTGGATGGGAGACCGCCTGGGAATACCAGGTGCTGTAAGCT
1016		4	34910568	34910686	minus	GCTTACGGCCATACCGCCCTGGAAATGCCCGATCTCATCTGAACTCGGAAGTAAAGCAGGGTCGGGCCTGGTAAGTACTTGGATGGGAGACCGCCTGGGAATACCAGGTGCTGTAAGCT
1017	seq15	4	34910745	34910863	minus	GCTTACGGCCATACCACCCTGGAAATGCCCGATCTCATCTGAACTCGTAAGTAAAGCAGGGTCGGGCCTGGTTAGTACTTGGATGGGAGACCGCCTGGGAATACCAGGTGCTGTAAGCT
1018		4	34910922	34911040	minus	GCTTACGGCCATACCACCCTGGAAATGCCCGATCTCCTCTGAACTCGGAAGTAAAGCAGGGTCGGGCCTGGTTAGTACTTGGATGGGAGACCGCCTGGGAATACCAGGTGCTGTAAGCT
1019		4	34911099	34911217	minus	GCTTACGGCCATACCGCCCTGGAAATGCCCGATCTCATCTGAACTCGGAAGTAAAGCAGGGTCGGGCCTGGTAAGTACTTGGATGGGAGACCGCCTGGGAATACCAGGTGCTGTAAGCT
1020	seq15	4	34911276	34911394	minus	GCTTACGGCCATACCACCCTGGAAATGCCCGATCTCATCTGAACTCGTAAGTAAAGCAGGGTCGGGCCTGGTTAGTACTTGGATGGGAGACCGCCTGGGAATACCAGGTGCTGTAAGCT
1021		4	34911453	34911571	minus	GCTTACGGCCATACCACCCTGGAAATGCCCGATCTCCTCTGAACTCGGAAGTAAAGCAGGGTCGGGCCTGGTTAGTACTTGGATGGGAGACCGCCTGGGAATACCAGGTGCTGTAAGCT
1022		4	34911630	34911748	minus	GCTTACGGCCATACCGCCCTGGAAATGCCCGATCTCATCTGAACTCGGAAGTAAAGCAGGGTCGGGCCTGGTAAGTACTTGGATGGGAGACCGCCTGGGAATACCAGGTGCTGTAAGCT
1023	seq15	4	34911807	34911925	minus	GCTTACGGCCATACCACCCTGGAAATGCCCGATCTCATCTGAACTCGTAAGTAAAGCAGGGTCGGGCCTGGTTAGTACTTGGATGGGAGACCGCCTGGGAATACCAGGTGCTGTAAGCT
1024		4	34911984	34912102	minus	GCTTACGGCCATACCACCCTGGAAATGCCCGATCTCCTCTGAACTCGGAAGTAAAGCAGGGTCGGGCCTGGTTAGTACTTGGATGGGAGACCGCCTGGGAATACCAGGTGCTGTAAGCT
1025		4	34912161	34912279	minus	GCTTACGGCCATACCGCCCTGGAAATGCCCGATCTCATCTGAACTCGGAAGTAAAGCAGGGTCGGGCCTGGTAAGTACTTGGATGGGAGACCGCCTGGGAATACCAGGTGCTGTAAGCT
1026	seq15	4	34912338	34912456	minus	GCTTACGGCCATACCACCCTGGAAATGCCCGATCTCATCTGAACTCGTAAGTAAAGCAGGGTCGGGCCTGGTTAGTACTTGGATGGGAGACCGCCTGGGAATACCAGGTGCTGTAAGCT
1027		4	34912515	34912633	minus	GCTTACGGCCATACCACCCTGGAAATGCCCGATCTCCTCTGAACTCGGAAGTAAAGCAGGGTCGGGCCTGGTTAGTACTTGGATGGGAGACCGCCTGGGAATACCAGGTGCTGTAAGCT
1028		4	34912692	34912810	minus	GCTTACGGCCATACCGCCCTGGAAATGCCCGATCTCATCTGAACTCGGAAGTAAAGCAGGGTCGGGCCTGGTAAGTACTTGGATGGGAGACCGCCTGGGAATACCAGGTGCTGTAAGCT
1029	seq15	4	34912869	34912987	minus	GCTTACGGCCATACCACCCTGGAAATGCCCGATCTCATCTGAACTCGTAAGTAAAGCAGGGTCGGGCCTGGTTAGTACTTGGATGGGAGACCGCCTGGGAATACCAGGTGCTGTAAGCT
1030		4	34913046	34913164	minus	GCTTACGGCCATACCACCCTGGAAATGCCCGATCTCATCTGAACTCGGAAGTAAAGCAGGGTCAGGCCTGGTTAGTACTTGGATGGGAGACCGCCTTGGAATACCAGGTGCTGTAAGCT
1031		4	34913223	34913341	minus	GCTTACGGCCATACCACCCTGGAAATGCCCGATCTCCTCTGAACTCGGAAGTAAAGCAGGGTCGGGCCTGGTTAGTACTTGGATGGGAGACCGCCTGGGAATACCAGGTGCTGTAAGCT
1032		4	34913400	34913518	minus	GCTTACGGCCATACCGCCCTGGAAATGCCCGATCTCATCTGAACTCGGAAGTAAAGCAGGGTCGGGCCTGGTAAGTACTTGGATGGGAGACCGCCTGGGAATACCAGGTGCTGTAAGCT
1033		4	34913577	34913689	minus	AAAAAAAAAAAAATGGAAATGCCCGATCTCATCTGAACTCGTAAGTAAAGCAGGGTCGGGCCTGGTTAGTACTTGGATGGGAGACCGCCTGGGAATACCAGGTGCTGTAAGCT
1034	seq1	4	35004644	35004762	plus	GCTTACGGCCATACCACCCTGGAAATGCCCGATCTCATCTGAACTCGGAAGTAAAGCAGGGTCGGGCCTGGTTAGTACTTGGATGGGAGACCGCCTGGGAATACCAGGTGCTGTAAGCT
1035	seq1	4	35004821	35004939	plus	GCTTACGGCCATACCACCCTGGAAATGCCCGATCTCATCTGAACTCGGAAGTAAAGCAGGGTCGGGCCTGGTTAGTACTTGGATGGGAGACCGCCTGGGAATACCAGGTGCTGTAAGCT
1036	seq16	4	35004998	35005116	plus	GCTTACGGCCATACCACCCTGGAAATGCCCGATCTCATCTGAACTCGGAAGTAATGCAGGGTCGGGCCTGGTTAGTACTTGGATGGGAGACCGCCTGGGAATACCAGGTGCTGTAAGCT
1037	seq1	4	35005175	35005293	plus	GCTTACGGCCATACCACCCTGGAAATGCCCGATCTCATCTGAACTCGGAAGTAAAGCAGGGTCGGGCCTGGTTAGTACTTGGATGGGAGACCGCCTGGGAATACCAGGTGCTGTAAGCT
1038	seq1	4	35005352	35005470	plus	GCTTACGGCCATACCACCCTGGAAATGCCCGATCTCATCTGAACTCGGAAGTAAAGCAGGGTCGGGCCTGGTTAGTACTTGGATGGGAGACCGCCTGGGAATACCAGGTGCTGTAAGCT
1039		4	35005529	35005647	plus	GCTTACGGCCATACCACCCTGGAAATGCCCGATCTCATCTGAACTCGGAAGTAAAGCAGGGTCGGGCCTGGTTAGTAGTTGGATGGGAGACCGCCTGGGAATACCAGGTGCTGTAAGCT
1040	seq1	4	35005706	35005824	plus	GCTTACGGCCATACCACCCTGGAAATGCCCGATCTCATCTGAACTCGGAAGTAAAGCAGGGTCGGGCCTGGTTAGTACTTGGATGGGAGACCGCCTGGGAATACCAGGTGCTGTAAGCT
1041	seq1	4	35005883	35006001	plus	GCTTACGGCCATACCACCCTGGAAATGCCCGATCTCATCTGAACTCGGAAGTAAAGCAGGGTCGGGCCTGGTTAGTACTTGGATGGGAGACCGCCTGGGAATACCAGGTGCTGTAAGCT
1042	seq17	4	35011790	35011908	plus	GCTTACGGCCATACCACCCTGGAAATGCCCGATCTCATCTGAACTCGGAAGTAAAGCAGGGTCGGGCCTGGTTAGTACTTGGATGGGAGACCGCCTGGGAATACCAGGTGCTTTAAGCT
1043	seq1	4	35011967	35012085	plus	GCTTACGGCCATACCACCCTGGAAATGCCCGATCTCATCTGAACTCGGAAGTAAAGCAGGGTCGGGCCTGGTTAGTACTTGGATGGGAGACCGCCTGGGAATACCAGGTGCTGTAAGCT
1044		4	35012144	35012262	plus	GCTTACGGCCATACCACCCTGGAAATGCCCGATCTCATCTGAACTCGGAAGTAAAGCAGGGTCGGGCCTCGTTAGTACTTGGATGGGAGACCGCCTGGGAATACCAGGTGCTGTAAGCT
1045		4	35186537	35186649	minus	ACAGCCATATCACACTGCAGCCCAAGACAGGTTACTCCCTGAAGCTAAGCAGGGCTGAGCCTGGCCAGTACCTGGCTGTGAGACCACTAGGGAAAACTAGGTTGCTGTTAGAA
1046		4	35218571	35218683	minus	ACAGCCATATCACACTGCAGCCCAAGACAGGTTACTCCCTGAAGCTAAGCAGGGCTGAGCCTGGCCAGTGCCTGGCTGTGAGACCACTAGGGAAAACTAGGTTGCTGTTAGAA
1047		4	35271905	35272030	minus	ATCCTATTGCCGGCAGCTAGCTCTCTGCAACTCTCACATGGTTGCCCACTGAAGCTAAGCAGGGCTGCGCCTGGTCAGTACCTGGATGGGAGACCACATGGGAAAGCTAGGTTGCTGCCGGAAGTG
1048		4	35357410	35357528	plus	GCTTACGGCCATACCACCCTGGAAATGCCCGATCTCATCTGAACTCGGAAGTAAAGCAGGGTCGGGCCTGGTTAGTACTTGAATGGGAGACCGCCTGGCAATACCAGGTGCTGTAAGCT
1049		4	35357587	35357705	plus	GCTTACGGCCATACCACTATGGAATTGCCCGATCTCATCTGAACTCGGAAGTAAAGCAGGGTCTGGCCTGGTTAGTACTTGGATGGGAGACCGCCTGGGAATACCAGGTGCTGTAAGCT
1050	seq1	4	35357764	35357882	plus	GCTTACGGCCATACCACCCTGGAAATGCCCGATCTCATCTGAACTCGGAAGTAAAGCAGGGTCGGGCCTGGTTAGTACTTGGATGGGAGACCGCCTGGGAATACCAGGTGCTGTAAGCT
1051	seq1	4	35357941	35358059	plus	GCTTACGGCCATACCACCCTGGAAATGCCCGATCTCATCTGAACTCGGAAGTAAAGCAGGGTCGGGCCTGGTTAGTACTTGGATGGGAGACCGCCTGGGAATACCAGGTGCTGTAAGCT
1052	seq1	4	35358118	35358236	plus	GCTTACGGCCATACCACCCTGGAAATGCCCGATCTCATCTGAACTCGGAAGTAAAGCAGGGTCGGGCCTGGTTAGTACTTGGATGGGAGACCGCCTGGGAATACCAGGTGCTGTAAGCT
1053	seq1	4	35358295	35358413	plus	GCTTACGGCCATACCACCCTGGAAATGCCCGATCTCATCTGAACTCGGAAGTAAAGCAGGGTCGGGCCTGGTTAGTACTTGGATGGGAGACCGCCTGGGAATACCAGGTGCTGTAAGCT
1054	seq18	4	35358472	35358590	plus	GCTTACGGCCATACCACCCTGGAAATGCCCGATCTCATCTGAACTCGGAAGTAAAGCAGGGTCAGGCCTGGTTAGTACTTGGATGGGAGACCGCCTGGGAATACCAGGTGCTGTAAGCT
1055		4	35358649	35358767	plus	GCTTACGGCCATACCACCCTGGAAATGCCCGATCTCATCTGAACTCGGAAGTAAAGCAGGGTCGGGCCTGGTTAGTACTTGGATGGGAGAACGCCTGGGAATACCAGGTGGTGTAAGCT
1056	seq19	4	35358826	35358944	plus	GCTTACGGCCATACCACCCTGGAAATACCCGATCTCATCTGAACTCGGAAGTAAAGCAGGGTCGGGCCTGGTTAGTACTTGGATGGGAGACCGCCTGGGAATACCAGGTGCTGTAAGCT
1057		4	35359004	35359121	plus	CTTACGGCCATACCACCCTGGAAATGCCCGATCTCATCTGAACTCGGAAGTAAAGCAGGGTCGGGCCTGGTTAGTACTTGGATGGGAGACCGCCTGGGAATACCAGGTGCTGTAAGCT
1058	seq20	4	35359180	35359298	plus	GCTTACGGCCATACCACCCTGGAAATGCCCGATCTCATCTGAACTCGGAAGTAAAGCAGGGTCGGGCCTGGTTAGTACTTGGATGGGAGACCGCCTGGCAATACCAGGTGCTGTAAGCT
1059		4	35359357	35359475	plus	GCTTATGGCCATACCACCCTGGAAATGCCCGATCTCATCTGAACTCGGAAGTAAAGCAGGGTCGGGCCTGGTTAGTACTTGGATTGGAGACCGCCTGGGAATACCAGGTGCTGTAAGCT
1060	seq1	4	35359534	35359652	plus	GCTTACGGCCATACCACCCTGGAAATGCCCGATCTCATCTGAACTCGGAAGTAAAGCAGGGTCGGGCCTGGTTAGTACTTGGATGGGAGACCGCCTGGGAATACCAGGTGCTGTAAGCT
1061	seq21	4	35359711	35359829	plus	GCTTACGGCCATACCACCCTGGAAATGCCCGATCTCATCTGAACTCGGAAGTAAAGCAGGGTCGGGCCTGGTTAGTACTTGGATGGGAGACCGCTTGGGAATACCAGGTGCTGTAAGCT
1062		4	35359888	35360006	plus	GCTTACGGCCATACCACCCTGGAAATGCCCGATCTCATCTGAACTCGGAAGTAAAGCAGGGTCGGGCCTGGTTAGTACTTTGATGGGAGACCGCCTGGCAATACCAGGTGCTGTAAGCT
1063		4	35360065	35360183	plus	GCTTATGGCCATACCACCCTGGAAATGCCCGATCTCATCTGAACTCGGAAGTAAAGCAGGGTCGGGCCTGGTTAGTACTTGGATTGGAGACCGCCTGGGAATACCAGGTGCTGTAAGCT
1064	seq1	4	35360242	35360360	plus	GCTTACGGCCATACCACCCTGGAAATGCCCGATCTCATCTGAACTCGGAAGTAAAGCAGGGTCGGGCCTGGTTAGTACTTGGATGGGAGACCGCCTGGGAATACCAGGTGCTGTAAGCT
1065		4	35362564	35362682	plus	GCTTACGGCCATACCACCCTGGAAATGCCCGATCTCATCTGAACTCGGAAGTAAAGCAGGGTCGGGCCTGGTTAGTACTTGAATGGGAGACCGCCTGGCAATACCAGGTGCTGTAAGCT
1066		4	35362741	35362858	plus	GCTTACGGCCATACCACTATGGAATTGCCCGATCTCATCTGAACTCGGAAGTAAAGCAGGTCGGGCCTGGTTAGTACTTGGATGGGAGACCGCCTGGGAATACCAGGTGCTGTGAGCT
1067	seq1	4	35362917	35363035	plus	GCTTACGGCCATACCACCCTGGAAATGCCCGATCTCATCTGAACTCGGAAGTAAAGCAGGGTCGGGCCTGGTTAGTACTTGGATGGGAGACCGCCTGGGAATACCAGGTGCTGTAAGCT
1068	seq18	4	35363094	35363212	plus	GCTTACGGCCATACCACCCTGGAAATGCCCGATCTCATCTGAACTCGGAAGTAAAGCAGGGTCAGGCCTGGTTAGTACTTGGATGGGAGACCGCCTGGGAATACCAGGTGCTGTAAGCT
1069		4	35489125	35489249	plus	TCAACTAGCCAGCAGCTAGCTCTCTAAAACTCTCACATGGTCACTCACTGAAGCTAAGCAGGGCTGCGCCCGATCAGTAGCTGAATGGGAGACCACATGGGAAAGCTAGGTTGCTGCTGGAAGTG
1070	seq22	4	35566772	35566890	plus	GCTTACGGCCATACCACCCTGGAAATGCCCGATCTCATCTGAACTCGGAAGTAAAGCAGGGTCGGGCCTGGTTAGTACTTGGATGGGAGACCGCCTGGGAATACCGGGTGCTGTAAGCT
1071	seq22	4	35566949	35567067	plus	GCTTACGGCCATACCACCCTGGAAATGCCCGATCTCATCTGAACTCGGAAGTAAAGCAGGGTCGGGCCTGGTTAGTACTTGGATGGGAGACCGCCTGGGAATACCGGGTGCTGTAAGCT
1072		4	35567126	35567244	plus	GCTTACGGCCATACCACCCTGGAAATGCCCGATCTCATCTGATCTCGGAAGTAAAGCAGGGTTGGGCCTGGTTAGTACTTGGATGGGAGACCGCCTGGGAATACCGGGTGCTGTAAGCT
1073		4	35567303	35567421	plus	GCTTACAGCCATACCACCCTGGAAATGCCCGATCTCATCTGAACTCGGAAGTAAAGCAGGGTCGGGCCTGGTTAGTACTTGGATGGGAGACCGCCTGGGAATACCGGGTGCTGTAAGCT
1074	seq1	4	35567480	35567598	plus	GCTTACGGCCATACCACCCTGGAAATGCCCGATCTCATCTGAACTCGGAAGTAAAGCAGGGTCGGGCCTGGTTAGTACTTGGATGGGAGACCGCCTGGGAATACCAGGTGCTGTAAGCT
1075	seq1	4	35567657	35567775	plus	GCTTACGGCCATACCACCCTGGAAATGCCCGATCTCATCTGAACTCGGAAGTAAAGCAGGGTCGGGCCTGGTTAGTACTTGGATGGGAGACCGCCTGGGAATACCAGGTGCTGTAAGCT
1076	seq1	4	35567834	35567952	plus	GCTTACGGCCATACCACCCTGGAAATGCCCGATCTCATCTGAACTCGGAAGTAAAGCAGGGTCGGGCCTGGTTAGTACTTGGATGGGAGACCGCCTGGGAATACCAGGTGCTGTAAGCT
1077	seq23	4	35568011	35568129	plus	GCTTACGGCCATACCACCCTGGAAATGCCCGATCTCATCTGAACTCGGAAGTAAAGCAGGGTCGGGCCTGGTTAGTACTTGGATGGGAGACCGCCTGGGAATACCAGGTCCTGTAAGCT
1078	seq1	4	35568188	35568306	plus	GCTTACGGCCATACCACCCTGGAAATGCCCGATCTCATCTGAACTCGGAAGTAAAGCAGGGTCGGGCCTGGTTAGTACTTGGATGGGAGACCGCCTGGGAATACCAGGTGCTGTAAGCT
1079	seq1	4	35568365	35568483	plus	GCTTACGGCCATACCACCCTGGAAATGCCCGATCTCATCTGAACTCGGAAGTAAAGCAGGGTCGGGCCTGGTTAGTACTTGGATGGGAGACCGCCTGGGAATACCAGGTGCTGTAAGCT
1080	seq24	4	35568542	35568660	plus	GCTTACGGCCGTACCACCCTGGAAATGCCCGATCTCATCTGAACTCGGAAGTAAAGCAGGGTCGGGCCTGGTTAGTACTTGGATGGGAGACCGCCTGGGAATACCAGGTGCTGTAAGCT
1081		4	35568719	35568837	plus	GCTTACGGCCATACCACCCTGGAAATGCCCGATCTCATTTGAACTCGGAAGTAAAGCAGGGTCGGGCCTGGTTAGTACTTGGATTGGAGACCGCCTGGGAATACCAGGTGCTGTAAGCT
1082		4	35568896	35569014	plus	GCTTACGGCCATACCACCCTGGAAATGCCCGATCTCATATGAACTCGGAAGTAAAGCAGGGTCGGGCCTGGTTAGTACTTGGATGGGAGACCGCCTGGGAATACCACGTGCTGTAAGCT
1083	seq1	4	35569073	35569191	plus	GCTTACGGCCATACCACCCTGGAAATGCCCGATCTCATCTGAACTCGGAAGTAAAGCAGGGTCGGGCCTGGTTAGTACTTGGATGGGAGACCGCCTGGGAATACCAGGTGCTGTAAGCT
1084	seq1	4	35569250	35569368	plus	GCTTACGGCCATACCACCCTGGAAATGCCCGATCTCATCTGAACTCGGAAGTAAAGCAGGGTCGGGCCTGGTTAGTACTTGGATGGGAGACCGCCTGGGAATACCAGGTGCTGTAAGCT
1085		4	35569427	35569545	plus	GCTTACGGCCATACCACCCTGGAAATGCCCGATCTCATCTGAACTCGGAAGTAAAGCAGGGTCAGGCCTGGTTAGTACCTGGATGGGAGACCGCCTGGGAATACCAGGTGCTGTAAGCT
1086	seq1	4	35569604	35569722	plus	GCTTACGGCCATACCACCCTGGAAATGCCCGATCTCATCTGAACTCGGAAGTAAAGCAGGGTCGGGCCTGGTTAGTACTTGGATGGGAGACCGCCTGGGAATACCAGGTGCTGTAAGCT
1087	seq23	4	35569781	35569899	plus	GCTTACGGCCATACCACCCTGGAAATGCCCGATCTCATCTGAACTCGGAAGTAAAGCAGGGTCGGGCCTGGTTAGTACTTGGATGGGAGACCGCCTGGGAATACCAGGTCCTGTAAGCT
1088	seq1	4	35569958	35570076	plus	GCTTACGGCCATACCACCCTGGAAATGCCCGATCTCATCTGAACTCGGAAGTAAAGCAGGGTCGGGCCTGGTTAGTACTTGGATGGGAGACCGCCTGGGAATACCAGGTGCTGTAAGCT
1089		4	35570135	35570251	plus	GCTTACGGCCACACCACCCTGGAAATGCCCGATCTCATCTGAACTCGGAAGTAAAGCAGGGTCGGGCCTGGTTAGTACTTGGATGGGAGACCGCCTGGGAATACCAGGTGCTGTAAG
1090		4	35576003	35576121	plus	GCTTACGGCCATACCACCCTGGAAATGCCCGATCTCATCTGAACTCGGAAGTAAAGCAGGGTCGGGCCTGGTTAGTACTTGGATGGGAGACCGTCTGGGAATACCAGGTGCTGTAAGCT
1091	seq24	4	35576180	35576298	plus	GCTTACGGCCGTACCACCCTGGAAATGCCCGATCTCATCTGAACTCGGAAGTAAAGCAGGGTCGGGCCTGGTTAGTACTTGGATGGGAGACCGCCTGGGAATACCAGGTGCTGTAAGCT
1092	seq1	4	35576357	35576475	plus	GCTTACGGCCATACCACCCTGGAAATGCCCGATCTCATCTGAACTCGGAAGTAAAGCAGGGTCGGGCCTGGTTAGTACTTGGATGGGAGACCGCCTGGGAATACCAGGTGCTGTAAGCT
1093	seq26	4	35576534	35576652	plus	GCTTACAGCCATACCACCCTGGAAATGCCCGATCTCATCTGAACTCGGAAGTAAAGCAGGGTCGGGCCTGGTTAGTACTTGGATGGGAGACCGCCTGGGAATACCAGGTGCTGTAAGCT
1094	seq13	4	35576711	35576829	plus	GCTTACGGCCATACCACCCTGGAAATGCCTGATCTCATCTGAACTCGGAAGTAAAGCAGGGTCGGGCCTGGTTAGTACTTGGATGGGAGACCGCCTGGGAATACCAGGTGCTGTAAGCT
1095	seq1	4	35576888	35577006	plus	GCTTACGGCCATACCACCCTGGAAATGCCCGATCTCATCTGAACTCGGAAGTAAAGCAGGGTCGGGCCTGGTTAGTACTTGGATGGGAGACCGCCTGGGAATACCAGGTGCTGTAAGCT
1096	seq1	4	35577065	35577183	plus	GCTTACGGCCATACCACCCTGGAAATGCCCGATCTCATCTGAACTCGGAAGTAAAGCAGGGTCGGGCCTGGTTAGTACTTGGATGGGAGACCGCCTGGGAATACCAGGTGCTGTAAGCT
1097	seq1	4	35577242	35577360	plus	GCTTACGGCCATACCACCCTGGAAATGCCCGATCTCATCTGAACTCGGAAGTAAAGCAGGGTCGGGCCTGGTTAGTACTTGGATGGGAGACCGCCTGGGAATACCAGGTGCTGTAAGCT
1098	seq1	4	35577419	35577537	plus	GCTTACGGCCATACCACCCTGGAAATGCCCGATCTCATCTGAACTCGGAAGTAAAGCAGGGTCGGGCCTGGTTAGTACTTGGATGGGAGACCGCCTGGGAATACCAGGTGCTGTAAGCT
1099	seq1	4	35577596	35577714	plus	GCTTACGGCCATACCACCCTGGAAATGCCCGATCTCATCTGAACTCGGAAGTAAAGCAGGGTCGGGCCTGGTTAGTACTTGGATGGGAGACCGCCTGGGAATACCAGGTGCTGTAAGCT
1100	seq1	4	35577773	35577891	plus	GCTTACGGCCATACCACCCTGGAAATGCCCGATCTCATCTGAACTCGGAAGTAAAGCAGGGTCGGGCCTGGTTAGTACTTGGATGGGAGACCGCCTGGGAATACCAGGTGCTGTAAGCT
1101		4	35577950	35578071	plus	GCTTACGGCCATACCACCCTGGAAATGCCCGATCTCATCTGAACTCGGAAGTAAAGCAGGGTCGGGCCTGGTTAGTACTTGGATGGGAGACGACCGCCTGGGAATACCAGGTGCTGTAAGCT
1102	seq1	4	35578130	35578248	plus	GCTTACGGCCATACCACCCTGGAAATGCCCGATCTCATCTGAACTCGGAAGTAAAGCAGGGTCGGGCCTGGTTAGTACTTGGATGGGAGACCGCCTGGGAATACCAGGTGCTGTAAGCT
1103		4	35578307	35578425	plus	GCTTACGGCCACACCACCCTGGAAATGCCCGATCTCATCTGAACTCGGAAGTAAAGCAGGGTCGGGCCTGGTTAGTACTTGGATGGGAGACCGCCTGGGAATAGCAGGTGCTGTAAGCT
1104	seq1	4	35578484	35578602	plus	GCTTACGGCCATACCACCCTGGAAATGCCCGATCTCATCTGAACTCGGAAGTAAAGCAGGGTCGGGCCTGGTTAGTACTTGGATGGGAGACCGCCTGGGAATACCAGGTGCTGTAAGCT
1105		4	35578661	35578779	plus	GCTTACGGCCATACCACCCTGGAAATGCCCGATCTCATCTGAACTCGGAAGTAAAGCAGGGTCGGGCCTGGTTAGTACTTGGATGGGAGACTGCCTCGGAATACCAGGTGCTGTAAGCT
1106		4	35578838	35578956	plus	GCTTACGGCCAAACCACCCTGGAAATGCCCGATCTCATCTAAACTCGGAAGTAAAGCAGGGTCGGCCCTGGTTAGTACTTGGATGGGAGACCGCCTGGGAATACCAGGTGCTGTAAGCT
1107	seq1	4	35579015	35579133	plus	GCTTACGGCCATACCACCCTGGAAATGCCCGATCTCATCTGAACTCGGAAGTAAAGCAGGGTCGGGCCTGGTTAGTACTTGGATGGGAGACCGCCTGGGAATACCAGGTGCTGTAAGCT
1108	seq1	4	35579192	35579310	plus	GCTTACGGCCATACCACCCTGGAAATGCCCGATCTCATCTGAACTCGGAAGTAAAGCAGGGTCGGGCCTGGTTAGTACTTGGATGGGAGACCGCCTGGGAATACCAGGTGCTGTAAGCT
1109	seq27	4	35579369	35579487	plus	GCTTACGGCCATACCACCCTGGAAATGCCCGATCTCATCTGAACTCGGAAGTAAAGCAGGGTTGGGCCTGGTTAGTACTTGGATGGGAGACCGCCTGGGAATACCAGGTGCTGTAAGCT
1110		4	35579546	35579654	plus	GCTTACGGCCATACCACCCTGGAAATGCCTGAACTCGGAGATAAAGCAGGGTCGGGCCTGGTTAGTACTTGGATGGGAGACCGCCTGGGAATACCAGGTGCTGTAAGCT
1111	seq1	4	35579713	35579831	plus	GCTTACGGCCATACCACCCTGGAAATGCCCGATCTCATCTGAACTCGGAAGTAAAGCAGGGTCGGGCCTGGTTAGTACTTGGATGGGAGACCGCCTGGGAATACCAGGTGCTGTAAGCT
1112	seq1	4	35579890	35580008	plus	GCTTACGGCCATACCACCCTGGAAATGCCCGATCTCATCTGAACTCGGAAGTAAAGCAGGGTCGGGCCTGGTTAGTACTTGGATGGGAGACCGCCTGGGAATACCAGGTGCTGTAAGCT
1113		4	35580069	35580185	plus	TTACGGCCATACCACCCTGGAAATGCCCGATCTCATCTGAACTCGGAAGTAAAGCAGGGTCGGGCCTGGTTAGTACTTGGATGGGAGACCGCCTGGGAATACCAGGTGCTGTAAGCT
1114		4	35580244	35580362	plus	GCTTACGGCCATACCACCCTGGAAATGCCTGATCTCATCTGAACTCGTAAGTAAAGCAGGGTCGGGCCTGCTTAGTACTTGGATGGGAGACCGCCTGGGAATACCAGGTGCTGTAAGCT
1115		4	35580421	35580539	plus	GCTTACGGCCATACCACCCTGGAAATGCCCAATCTCATCTGAACTCGGAAGTAAAGCAGGGTCGGGCCTGGTTAGTACTTAGATGGGAGACCGCCTGGGAATACCAGGTGCTGTAAGCT
1116		4	35580598	35580716	plus	GCTTACGGCCATACCACCCTGGAAATGCCCGATCTCATCTGAACTCGGAAGTAAAGCAGGGTCGGGCCTGGTTAGTACTTGGATGGGAGACCGCCTGGGAATAGCAGGTGCTGTAAGCT
1117	seq29	4	35580775	35580893	plus	GCTTACGGCCATACCACCCTGGAAATGCCCGATCTCATCTGAACTTGGAAGTAAAGCAGGGTCGGGCCTGGTTAGTACTTGGATGGGAGACCGCCTGGGAATACCAGGTGCTGTAAGCT
1118	seq1	4	35580952	35581070	plus	GCTTACGGCCATACCACCCTGGAAATGCCCGATCTCATCTGAACTCGGAAGTAAAGCAGGGTCGGGCCTGGTTAGTACTTGGATGGGAGACCGCCTGGGAATACCAGGTGCTGTAAGCT
1119	seq1	4	35581129	35581247	plus	GCTTACGGCCATACCACCCTGGAAATGCCCGATCTCATCTGAACTCGGAAGTAAAGCAGGGTCGGGCCTGGTTAGTACTTGGATGGGAGACCGCCTGGGAATACCAGGTGCTGTAAGCT
1120	seq30	4	35581306	35581424	plus	GCTTACGGCCATACCACCCTGGAAATGCCCGATCTCATCTGAACTCGGAAGTAAAGCAGGGTCGGGCCTGGTTAGTACTTGGATGGGAGACAGCCTGGGAATACCAGGTGCTGTAAGCT
1121		4	35581483	35581601	plus	GCTTACGGCCATAACACCCTGGAAATGCCCGATCTCATCTGAACTCGGAAGTAAAGCAGGGTTGGGCCTGGTTAGTACTTGGATGGGAGACCGCCTGGGAATACCAGGTGCTGTAAGCT
1122	seq1	4	35581660	35581778	plus	GCTTACGGCCATACCACCCTGGAAATGCCCGATCTCATCTGAACTCGGAAGTAAAGCAGGGTCGGGCCTGGTTAGTACTTGGATGGGAGACCGCCTGGGAATACCAGGTGCTGTAAGCT
1123		4	35581837	35581955	plus	GCTTACGGCCATACCACCCTGGAAATGCCCGATCTCATCTGAACTCGGAAGTAAAGCAAGGTCGGGCCTGGTTAGTACTTGGATGGGAGACCGCCTGGGAATACCAGGTGCTGTAAGCT
1124	seq1	4	35582014	35582132	plus	GCTTACGGCCATACCACCCTGGAAATGCCCGATCTCATCTGAACTCGGAAGTAAAGCAGGGTCGGGCCTGGTTAGTACTTGGATGGGAGACCGCCTGGGAATACCAGGTGCTGTAAGCT
1125	seq1	4	35582191	35582309	plus	GCTTACGGCCATACCACCCTGGAAATGCCCGATCTCATCTGAACTCGGAAGTAAAGCAGGGTCGGGCCTGGTTAGTACTTGGATGGGAGACCGCCTGGGAATACCAGGTGCTGTAAGCT
1126	seq1	4	35582368	35582486	plus	GCTTACGGCCATACCACCCTGGAAATGCCCGATCTCATCTGAACTCGGAAGTAAAGCAGGGTCGGGCCTGGTTAGTACTTGGATGGGAGACCGCCTGGGAATACCAGGTGCTGTAAGCT
1127	seq1	4	35582545	35582663	plus	GCTTACGGCCATACCACCCTGGAAATGCCCGATCTCATCTGAACTCGGAAGTAAAGCAGGGTCGGGCCTGGTTAGTACTTGGATGGGAGACCGCCTGGGAATACCAGGTGCTGTAAGCT
1128	seq1	4	35582722	35582840	plus	GCTTACGGCCATACCACCCTGGAAATGCCCGATCTCATCTGAACTCGGAAGTAAAGCAGGGTCGGGCCTGGTTAGTACTTGGATGGGAGACCGCCTGGGAATACCAGGTGCTGTAAGCT
1129	seq1	4	35582899	35583017	plus	GCTTACGGCCATACCACCCTGGAAATGCCCGATCTCATCTGAACTCGGAAGTAAAGCAGGGTCGGGCCTGGTTAGTACTTGGATGGGAGACCGCCTGGGAATACCAGGTGCTGTAAGCT
1130	seq1	4	35583076	35583194	plus	GCTTACGGCCATACCACCCTGGAAATGCCCGATCTCATCTGAACTCGGAAGTAAAGCAGGGTCGGGCCTGGTTAGTACTTGGATGGGAGACCGCCTGGGAATACCAGGTGCTGTAAGCT
1131	seq1	4	35583253	35583371	plus	GCTTACGGCCATACCACCCTGGAAATGCCCGATCTCATCTGAACTCGGAAGTAAAGCAGGGTCGGGCCTGGTTAGTACTTGGATGGGAGACCGCCTGGGAATACCAGGTGCTGTAAGCT
1132	seq1	4	35583430	35583548	plus	GCTTACGGCCATACCACCCTGGAAATGCCCGATCTCATCTGAACTCGGAAGTAAAGCAGGGTCGGGCCTGGTTAGTACTTGGATGGGAGACCGCCTGGGAATACCAGGTGCTGTAAGCT
1133	seq1	4	35583607	35583725	plus	GCTTACGGCCATACCACCCTGGAAATGCCCGATCTCATCTGAACTCGGAAGTAAAGCAGGGTCGGGCCTGGTTAGTACTTGGATGGGAGACCGCCTGGGAATACCAGGTGCTGTAAGCT
1134	seq1	4	35583784	35583902	plus	GCTTACGGCCATACCACCCTGGAAATGCCCGATCTCATCTGAACTCGGAAGTAAAGCAGGGTCGGGCCTGGTTAGTACTTGGATGGGAGACCGCCTGGGAATACCAGGTGCTGTAAGCT
1135	seq1	4	35583961	35584079	plus	GCTTACGGCCATACCACCCTGGAAATGCCCGATCTCATCTGAACTCGGAAGTAAAGCAGGGTCGGGCCTGGTTAGTACTTGGATGGGAGACCGCCTGGGAATACCAGGTGCTGTAAGCT
1136	seq1	4	35584138	35584256	plus	GCTTACGGCCATACCACCCTGGAAATGCCCGATCTCATCTGAACTCGGAAGTAAAGCAGGGTCGGGCCTGGTTAGTACTTGGATGGGAGACCGCCTGGGAATACCAGGTGCTGTAAGCT
1137	seq1	4	35584315	35584433	plus	GCTTACGGCCATACCACCCTGGAAATGCCCGATCTCATCTGAACTCGGAAGTAAAGCAGGGTCGGGCCTGGTTAGTACTTGGATGGGAGACCGCCTGGGAATACCAGGTGCTGTAAGCT
1138		4	35584492	35584610	plus	GCTTACGGCCACACCACCCTGGAAATGCCCGATCTCATCTAAACTCGGAAGTAAAGCAGGGTCGGGCCTGGTTAGTACTTGGATGGGAGACCGCCTGGGAATACCAGGTGCTGTAAGCT
1139	seq29	4	35584669	35584787	plus	GCTTACGGCCATACCACCCTGGAAATGCCCGATCTCATCTGAACTTGGAAGTAAAGCAGGGTCGGGCCTGGTTAGTACTTGGATGGGAGACCGCCTGGGAATACCAGGTGCTGTAAGCT
1140	seq1	4	35584846	35584964	plus	GCTTACGGCCATACCACCCTGGAAATGCCCGATCTCATCTGAACTCGGAAGTAAAGCAGGGTCGGGCCTGGTTAGTACTTGGATGGGAGACCGCCTGGGAATACCAGGTGCTGTAAGCT
1141	seq1	4	35585023	35585141	plus	GCTTACGGCCATACCACCCTGGAAATGCCCGATCTCATCTGAACTCGGAAGTAAAGCAGGGTCGGGCCTGGTTAGTACTTGGATGGGAGACCGCCTGGGAATACCAGGTGCTGTAAGCT
1142	seq1	4	35585200	35585318	plus	GCTTACGGCCATACCACCCTGGAAATGCCCGATCTCATCTGAACTCGGAAGTAAAGCAGGGTCGGGCCTGGTTAGTACTTGGATGGGAGACCGCCTGGGAATACCAGGTGCTGTAAGCT
1143		4	35585377	35585495	plus	GCTTACGGCCATACCACCCTGGAAATGCCCGATCTCATCTGAACTCAGAAGTAAAGCAGGGTCGGGCCTGGTTAGTACTTGGATGGGAGACCGCCTGGGAATACCAGGTGTTGCAAGCT
1144	seq1	4	35585554	35585672	plus	GCTTACGGCCATACCACCCTGGAAATGCCCGATCTCATCTGAACTCGGAAGTAAAGCAGGGTCGGGCCTGGTTAGTACTTGGATGGGAGACCGCCTGGGAATACCAGGTGCTGTAAGCT
1145	seq1	4	35585731	35585849	plus	GCTTACGGCCATACCACCCTGGAAATGCCCGATCTCATCTGAACTCGGAAGTAAAGCAGGGTCGGGCCTGGTTAGTACTTGGATGGGAGACCGCCTGGGAATACCAGGTGCTGTAAGCT
1146	seq31	4	35585908	35586026	plus	GCTTACGGCCACACCACCCTGGAAATGCCCGATCTCATCTGAACTCGGAAGTAAAGCAGGGTCGGGCCTGGTTAGTACTTGGATGGGAGACCGCCTGGGAATACCAGGTGCTGTAAGCT
1147		4	36037890	36038007	plus	AGCCGGCAGCTAGCTCTCTACAACTCTCACATGGCTGCCCACTGAAGCTAAGCAGGCCTGTGCCCGGTCAGTACCTGAATGGGAGACCACATGGGAAAGCTAGGTTGCTGCCGGAAGT
1148		4	36110683	36110801	plus	GCTTACGGCCATACCATGCTGGCAATACCTGATCTCATCTGAACTCGGAAGTAAAGCAGGGTCGGGCCTGGTTAGTACTTGGATGGCAGACCGCCTGGCAATACCAGGTGCTGTAAGCT
1149		4	36311021	36311146	plus	TTTGCCACAGCCATGTCACCCTGCAACCCAAGACCAGTTACTCACTGAAGCTAAGCAGGGCTGAGCCTGGTCAGTACCTGGATGGGAGACCAGTAGGGAACACTAGATTGCTGTTGGAAGTGGTGT
1150		4	36325698	36325799	plus	GTCATGCAACTCTCACATGGCTGCCCACTGAAGCTAAGCAGGGCTGCGCCCGGTCAGTACCTGAATGGGAGACCACATGGGAAAGCTAGGTTGCTGCCGGAA
1151		4	36365086	36365194	plus	AGCTGGCAGCTAGCTCTCTGCAACTCTCACATGGCTGCCCACTGAAGCTAAGCAGGGTCAGTACCTGGATGGGAGACCACATGGGAAAGCTAGGTTGCTGCTGGAAGTG
1152		4	36630945	36631063	minus	GCTTACGGCCATACCACCTTGGAAATGTCCGATCTCATCTGAACTCGGAAGTAAAGCAGGGTTGGGCCTGGTTAGTACTTGGATGGGAGACCGCCTGGGAATACCAGGTGCTATAAGCT
1153		4	36631242	36631360	minus	GCTTACGGCCATACCACCCTGGAAATGCCCGATCTCATCTGAATTCGGAAGTAAAGCAGGGTCGGGCCTGGTTAGTACTTGGATGGGAGACTGCCTGGGAATACCAGGTGCTGTATGCT
1154		4	36718421	36718539	plus	GCTTACGGCCATACCACCCTGGAAATGCCCGATCTCATCTGAACTCGGAAGTAAAGCAGAGTCGGGCCTGGTTAGTACTTGGATGGGAGACCGCCTGGGAATACCAGGTGCTGTAAGCT
1155	seq32	4	37072797	37072915	minus	GCTTACGGCCATACCACCCTGGAAATGCCCGATCTCATCTGAACTCGGAAGTAAAGCAGGGTCGGGCCTGGTTAGTACTTGGATGGGAGACCGCCTGGGAATACCAGGTGCTGTGAGCT
1156		4	37072974	37073092	minus	GCTTACGGCCATACCACCCTGGAAATGCCCGATCTCATCTGAACTCGGAAGTAAAGCAGGGTCGGGCCTGGTTAGTACTTGGATGGGAGACCGCCTGGGAATGCCAGGTGCTGTAAGCT
1157		4	37217504	37217608	minus	CACCCTGGAAATGCCCGATCTCATCTGAACTCGGAAGTAAAGCGGGGTCGGGCCTGGTTAGTACTTGGATGGGAGACCGCCTGGGAATACCAGGTGCTGTAAGCT
1158		4	37522009	37522113	plus	CACCCTGGAAATGCCCGATCTCATCTGAACTCGGAAGTAAAGCGGGGTTGGGCCTGGTTAGTACTTGGATGGGAGACCGCCTGGGAATACCAGGTGCTGTAAGCT
1159		4	37538760	37538883	plus	TTGAAAGCCGGCAGCTAGCTTTCTGCAACTCTCACATGGTTGCCCACTGAAGCCAAGCAGGGCTGCGCCCAGTCAGTACCTGGATGGGAGACCACATGGGAAAGCTAGGTTGCTGCCGGAAGTG
1160		4	37668933	37669051	plus	GCTTACGGCCATACCACCCTGGAAATGCGCGATCTCATCTGAACTCGGAAGTAAAGCAGGGTCGGGCCTGGTTAGTACTTGGATGGGAGACCGCCTGGGAATACCAGGTGCTGTAAGCT
1161		4	37669231	37669349	plus	GCTTACGGCCATACCACCCTGGAAATGCCCGATCTCATCTGAACTCGGAAGTAAAGCAGGGTTGGGCCTGGTTAGTACTTGGATGGGAGACCGCCTGGGAATACTAGGTGCTGTAAGCT
1162		4	37669528	37669646	plus	GCTTACGGCCATACCACCCTGGAAATGCCCGATCTCATCTGAACTCGGAAGTAAAGCAGGGTTGGGCCTGGTTAGTACTTGGATGGGAGACCGCCTGGGAATATCAGGTGCTGTAAGCT
1163		4	37669825	37669943	plus	GCTTATGGCCATACCACCCTGGAAATGCCCGATCTCATCTGAACTCTGAAGTAAAGCAGGGTTGGGCCTGGTTAGTACTTGGATGGGAGACTGCCTGGGAATACCAGGTGCTGTAAGCT
1164		4	38375665	38375789	minus	TATCCACAGCCATATCACCCTGCAGCCCAAGACCGGTTACTCACTGAAGCTAAGCAGGGCTGAGCCTGGTCAGTACCTGGATGGGAGACCACTAGGGAACACTAGGTTGCTGTTGGAAGTGGTGT
1165		4	38768940	38769072	plus	TATGTAAACTTCAATGCCGGCAGCTAGCTCTCTGCAACTCTCACATGGTCGCCCACTGAAGCTAAGCAGGGCTGCGCCCGGTCAGTACCTGGATGGGAGACCACATGGGAAAGCTAGGTTGCTGCCGGAAGTG
1166		4	38856775	38856892	minus	CTTACGGCCATACCACCCTGGAAATGCCCGATCTCATCTGAACTCGGAAGTAAAGCAGGGTCGGGCCTGGTTAGTACTTGGATGGGAGACCGCCTGGGAATACCAGGTGCTGTAAGCT
1167		4	38856952	38857069	minus	CTTACGGCCATACCACCCTGGAAATGCCCGATCTCATCTGAACTCGGAAGTAAAGCAGGGTCGGGCCTGGTTAGTACTTGGATGGGAGACCGCCTGGGAATACCAGGTGCTGTAAGCT
1168		4	38857129	38857241	minus	AAAAAAAAAAAAATGGAAATGCCCGATCTCATCTGAACTCGGAAGTAAAGCAGGGTCGGGCCTGGTTAGTACTTGGATGGGAGACCGCCTGGGAATACCAGGTGCTGTAAGCT
1169	seq1	4	38862880	38862998	minus	GCTTACGGCCATACCACCCTGGAAATGCCCGATCTCATCTGAACTCGGAAGTAAAGCAGGGTCGGGCCTGGTTAGTACTTGGATGGGAGACCGCCTGGGAATACCAGGTGCTGTAAGCT
1170	seq1	4	38863057	38863175	minus	GCTTACGGCCATACCACCCTGGAAATGCCCGATCTCATCTGAACTCGGAAGTAAAGCAGGGTCGGGCCTGGTTAGTACTTGGATGGGAGACCGCCTGGGAATACCAGGTGCTGTAAGCT
1171	seq1	4	38863234	38863352	minus	GCTTACGGCCATACCACCCTGGAAATGCCCGATCTCATCTGAACTCGGAAGTAAAGCAGGGTCGGGCCTGGTTAGTACTTGGATGGGAGACCGCCTGGGAATACCAGGTGCTGTAAGCT
1172	seq10	4	38863411	38863529	minus	GCTTATGGCCATACCACCCTGGAAATGCCCGATCTCATCTGAACTCGGAAGTAAAGCAGGGTCGGGCCTGGTTAGTACTTGGATGGGAGACCGCCTGGGAATACCAGGTGCTGTAAGCT
1173		4	38863588	38863706	minus	GCTTACGGCCATACCACCCTGGAAATGCCCGATCTCATCTGAACTCGGAAGTAAAGCAGGGTCGGGCCTGGTTAGTACTTGGAAGGGAGACCGCCTGGGAATACCAGGTGCTGAAAGCT
1174	seq1	4	38863765	38863883	minus	GCTTACGGCCATACCACCCTGGAAATGCCCGATCTCATCTGAACTCGGAAGTAAAGCAGGGTCGGGCCTGGTTAGTACTTGGATGGGAGACCGCCTGGGAATACCAGGTGCTGTAAGCT
1175	seq1	4	38863942	38864060	minus	GCTTACGGCCATACCACCCTGGAAATGCCCGATCTCATCTGAACTCGGAAGTAAAGCAGGGTCGGGCCTGGTTAGTACTTGGATGGGAGACCGCCTGGGAATACCAGGTGCTGTAAGCT
1176	seq1	4	38864119	38864237	minus	GCTTACGGCCATACCACCCTGGAAATGCCCGATCTCATCTGAACTCGGAAGTAAAGCAGGGTCGGGCCTGGTTAGTACTTGGATGGGAGACCGCCTGGGAATACCAGGTGCTGTAAGCT
1177	seq33	4	38864296	38864414	minus	GCTTACGGCCATACCACCCTGGAAATGCCCGATCTCATCTGAACTCGGAAGTAAAGCAGGGTCGGGCCTGGTTAGTACTTGGATGGGAGACCGCCTGGGAATACCAGGTGCTGAAAGCT
1178	seq1	4	38864473	38864591	minus	GCTTACGGCCATACCACCCTGGAAATGCCCGATCTCATCTGAACTCGGAAGTAAAGCAGGGTCGGGCCTGGTTAGTACTTGGATGGGAGACCGCCTGGGAATACCAGGTGCTGTAAGCT
1179	seq1	4	38864650	38864768	minus	GCTTACGGCCATACCACCCTGGAAATGCCCGATCTCATCTGAACTCGGAAGTAAAGCAGGGTCGGGCCTGGTTAGTACTTGGATGGGAGACCGCCTGGGAATACCAGGTGCTGTAAGCT
1180		4	38864827	38864944	minus	CTTACGGCCATACCACCCTGGAAATGCCCGATCTCATCTGAACTCGGAAGTAAAGCAGGGTCGGGCCTGGTTAGTACTTGGATGGGAGACCGCCTGGGAATACCAGGTGCTGTAAGCT
1181	seq1	4	38865004	38865122	minus	GCTTACGGCCATACCACCCTGGAAATGCCCGATCTCATCTGAACTCGGAAGTAAAGCAGGGTCGGGCCTGGTTAGTACTTGGATGGGAGACCGCCTGGGAATACCAGGTGCTGTAAGCT
1182	seq1	4	38865181	38865299	minus	GCTTACGGCCATACCACCCTGGAAATGCCCGATCTCATCTGAACTCGGAAGTAAAGCAGGGTCGGGCCTGGTTAGTACTTGGATGGGAGACCGCCTGGGAATACCAGGTGCTGTAAGCT
1183	seq1	4	38865358	38865476	minus	GCTTACGGCCATACCACCCTGGAAATGCCCGATCTCATCTGAACTCGGAAGTAAAGCAGGGTCGGGCCTGGTTAGTACTTGGATGGGAGACCGCCTGGGAATACCAGGTGCTGTAAGCT
1184	seq1	4	38865535	38865653	minus	GCTTACGGCCATACCACCCTGGAAATGCCCGATCTCATCTGAACTCGGAAGTAAAGCAGGGTCGGGCCTGGTTAGTACTTGGATGGGAGACCGCCTGGGAATACCAGGTGCTGTAAGCT
1185	seq1	4	38865712	38865830	minus	GCTTACGGCCATACCACCCTGGAAATGCCCGATCTCATCTGAACTCGGAAGTAAAGCAGGGTCGGGCCTGGTTAGTACTTGGATGGGAGACCGCCTGGGAATACCAGGTGCTGTAAGCT
1186	seq1	4	38865889	38866007	minus	GCTTACGGCCATACCACCCTGGAAATGCCCGATCTCATCTGAACTCGGAAGTAAAGCAGGGTCGGGCCTGGTTAGTACTTGGATGGGAGACCGCCTGGGAATACCAGGTGCTGTAAGCT
1187	seq1	4	38866066	38866184	minus	GCTTACGGCCATACCACCCTGGAAATGCCCGATCTCATCTGAACTCGGAAGTAAAGCAGGGTCGGGCCTGGTTAGTACTTGGATGGGAGACCGCCTGGGAATACCAGGTGCTGTAAGCT
1188	seq1	4	38866243	38866361	minus	GCTTACGGCCATACCACCCTGGAAATGCCCGATCTCATCTGAACTCGGAAGTAAAGCAGGGTCGGGCCTGGTTAGTACTTGGATGGGAGACCGCCTGGGAATACCAGGTGCTGTAAGCT
1189	seq1	4	38866420	38866538	minus	GCTTACGGCCATACCACCCTGGAAATGCCCGATCTCATCTGAACTCGGAAGTAAAGCAGGGTCGGGCCTGGTTAGTACTTGGATGGGAGACCGCCTGGGAATACCAGGTGCTGTAAGCT
1190	seq1	4	38866597	38866715	minus	GCTTACGGCCATACCACCCTGGAAATGCCCGATCTCATCTGAACTCGGAAGTAAAGCAGGGTCGGGCCTGGTTAGTACTTGGATGGGAGACCGCCTGGGAATACCAGGTGCTGTAAGCT
1191	seq1	4	38866774	38866892	minus	GCTTACGGCCATACCACCCTGGAAATGCCCGATCTCATCTGAACTCGGAAGTAAAGCAGGGTCGGGCCTGGTTAGTACTTGGATGGGAGACCGCCTGGGAATACCAGGTGCTGTAAGCT
1192	seq1	4	38866951	38867069	minus	GCTTACGGCCATACCACCCTGGAAATGCCCGATCTCATCTGAACTCGGAAGTAAAGCAGGGTCGGGCCTGGTTAGTACTTGGATGGGAGACCGCCTGGGAATACCAGGTGCTGTAAGCT
1193	seq1	4	38867128	38867246	minus	GCTTACGGCCATACCACCCTGGAAATGCCCGATCTCATCTGAACTCGGAAGTAAAGCAGGGTCGGGCCTGGTTAGTACTTGGATGGGAGACCGCCTGGGAATACCAGGTGCTGTAAGCT
1194	seq1	4	38867305	38867423	minus	GCTTACGGCCATACCACCCTGGAAATGCCCGATCTCATCTGAACTCGGAAGTAAAGCAGGGTCGGGCCTGGTTAGTACTTGGATGGGAGACCGCCTGGGAATACCAGGTGCTGTAAGCT
1195	seq1	4	38867482	38867600	minus	GCTTACGGCCATACCACCCTGGAAATGCCCGATCTCATCTGAACTCGGAAGTAAAGCAGGGTCGGGCCTGGTTAGTACTTGGATGGGAGACCGCCTGGGAATACCAGGTGCTGTAAGCT
1196	seq1	4	38867659	38867777	minus	GCTTACGGCCATACCACCCTGGAAATGCCCGATCTCATCTGAACTCGGAAGTAAAGCAGGGTCGGGCCTGGTTAGTACTTGGATGGGAGACCGCCTGGGAATACCAGGTGCTGTAAGCT
1197	seq1	4	38867836	38867954	minus	GCTTACGGCCATACCACCCTGGAAATGCCCGATCTCATCTGAACTCGGAAGTAAAGCAGGGTCGGGCCTGGTTAGTACTTGGATGGGAGACCGCCTGGGAATACCAGGTGCTGTAAGCT
1198	seq1	4	38868013	38868131	minus	GCTTACGGCCATACCACCCTGGAAATGCCCGATCTCATCTGAACTCGGAAGTAAAGCAGGGTCGGGCCTGGTTAGTACTTGGATGGGAGACCGCCTGGGAATACCAGGTGCTGTAAGCT
1199	seq1	4	38868190	38868308	minus	GCTTACGGCCATACCACCCTGGAAATGCCCGATCTCATCTGAACTCGGAAGTAAAGCAGGGTCGGGCCTGGTTAGTACTTGGATGGGAGACCGCCTGGGAATACCAGGTGCTGTAAGCT
1200	seq1	4	38868367	38868485	minus	GCTTACGGCCATACCACCCTGGAAATGCCCGATCTCATCTGAACTCGGAAGTAAAGCAGGGTCGGGCCTGGTTAGTACTTGGATGGGAGACCGCCTGGGAATACCAGGTGCTGTAAGCT
1201	seq1	4	38868544	38868662	minus	GCTTACGGCCATACCACCCTGGAAATGCCCGATCTCATCTGAACTCGGAAGTAAAGCAGGGTCGGGCCTGGTTAGTACTTGGATGGGAGACCGCCTGGGAATACCAGGTGCTGTAAGCT
1202	seq1	4	38868721	38868839	minus	GCTTACGGCCATACCACCCTGGAAATGCCCGATCTCATCTGAACTCGGAAGTAAAGCAGGGTCGGGCCTGGTTAGTACTTGGATGGGAGACCGCCTGGGAATACCAGGTGCTGTAAGCT
1203	seq1	4	38868898	38869016	minus	GCTTACGGCCATACCACCCTGGAAATGCCCGATCTCATCTGAACTCGGAAGTAAAGCAGGGTCGGGCCTGGTTAGTACTTGGATGGGAGACCGCCTGGGAATACCAGGTGCTGTAAGCT
1204	seq1	4	38869075	38869193	minus	GCTTACGGCCATACCACCCTGGAAATGCCCGATCTCATCTGAACTCGGAAGTAAAGCAGGGTCGGGCCTGGTTAGTACTTGGATGGGAGACCGCCTGGGAATACCAGGTGCTGTAAGCT
1205	seq1	4	38869252	38869370	minus	GCTTACGGCCATACCACCCTGGAAATGCCCGATCTCATCTGAACTCGGAAGTAAAGCAGGGTCGGGCCTGGTTAGTACTTGGATGGGAGACCGCCTGGGAATACCAGGTGCTGTAAGCT
1206	seq1	4	38869429	38869547	minus	GCTTACGGCCATACCACCCTGGAAATGCCCGATCTCATCTGAACTCGGAAGTAAAGCAGGGTCGGGCCTGGTTAGTACTTGGATGGGAGACCGCCTGGGAATACCAGGTGCTGTAAGCT
1207	seq1	4	38869606	38869724	minus	GCTTACGGCCATACCACCCTGGAAATGCCCGATCTCATCTGAACTCGGAAGTAAAGCAGGGTCGGGCCTGGTTAGTACTTGGATGGGAGACCGCCTGGGAATACCAGGTGCTGTAAGCT
1208	seq1	4	38869783	38869901	minus	GCTTACGGCCATACCACCCTGGAAATGCCCGATCTCATCTGAACTCGGAAGTAAAGCAGGGTCGGGCCTGGTTAGTACTTGGATGGGAGACCGCCTGGGAATACCAGGTGCTGTAAGCT
1209	seq1	4	38869960	38870078	minus	GCTTACGGCCATACCACCCTGGAAATGCCCGATCTCATCTGAACTCGGAAGTAAAGCAGGGTCGGGCCTGGTTAGTACTTGGATGGGAGACCGCCTGGGAATACCAGGTGCTGTAAGCT
1210	seq1	4	38870137	38870255	minus	GCTTACGGCCATACCACCCTGGAAATGCCCGATCTCATCTGAACTCGGAAGTAAAGCAGGGTCGGGCCTGGTTAGTACTTGGATGGGAGACCGCCTGGGAATACCAGGTGCTGTAAGCT
1211	seq1	4	38870314	38870432	minus	GCTTACGGCCATACCACCCTGGAAATGCCCGATCTCATCTGAACTCGGAAGTAAAGCAGGGTCGGGCCTGGTTAGTACTTGGATGGGAGACCGCCTGGGAATACCAGGTGCTGTAAGCT
1212	seq1	4	38870491	38870609	minus	GCTTACGGCCATACCACCCTGGAAATGCCCGATCTCATCTGAACTCGGAAGTAAAGCAGGGTCGGGCCTGGTTAGTACTTGGATGGGAGACCGCCTGGGAATACCAGGTGCTGTAAGCT
1213	seq1	4	38870668	38870786	minus	GCTTACGGCCATACCACCCTGGAAATGCCCGATCTCATCTGAACTCGGAAGTAAAGCAGGGTCGGGCCTGGTTAGTACTTGGATGGGAGACCGCCTGGGAATACCAGGTGCTGTAAGCT
1214	seq1	4	38870845	38870963	minus	GCTTACGGCCATACCACCCTGGAAATGCCCGATCTCATCTGAACTCGGAAGTAAAGCAGGGTCGGGCCTGGTTAGTACTTGGATGGGAGACCGCCTGGGAATACCAGGTGCTGTAAGCT
1215	seq1	4	38871022	38871140	minus	GCTTACGGCCATACCACCCTGGAAATGCCCGATCTCATCTGAACTCGGAAGTAAAGCAGGGTCGGGCCTGGTTAGTACTTGGATGGGAGACCGCCTGGGAATACCAGGTGCTGTAAGCT
1216	seq1	4	38871199	38871317	minus	GCTTACGGCCATACCACCCTGGAAATGCCCGATCTCATCTGAACTCGGAAGTAAAGCAGGGTCGGGCCTGGTTAGTACTTGGATGGGAGACCGCCTGGGAATACCAGGTGCTGTAAGCT
1217	seq1	4	38871376	38871494	minus	GCTTACGGCCATACCACCCTGGAAATGCCCGATCTCATCTGAACTCGGAAGTAAAGCAGGGTCGGGCCTGGTTAGTACTTGGATGGGAGACCGCCTGGGAATACCAGGTGCTGTAAGCT
1218	seq1	4	38871553	38871671	minus	GCTTACGGCCATACCACCCTGGAAATGCCCGATCTCATCTGAACTCGGAAGTAAAGCAGGGTCGGGCCTGGTTAGTACTTGGATGGGAGACCGCCTGGGAATACCAGGTGCTGTAAGCT
1219	seq1	4	38871730	38871848	minus	GCTTACGGCCATACCACCCTGGAAATGCCCGATCTCATCTGAACTCGGAAGTAAAGCAGGGTCGGGCCTGGTTAGTACTTGGATGGGAGACCGCCTGGGAATACCAGGTGCTGTAAGCT
1220	seq1	4	38871907	38872025	minus	GCTTACGGCCATACCACCCTGGAAATGCCCGATCTCATCTGAACTCGGAAGTAAAGCAGGGTCGGGCCTGGTTAGTACTTGGATGGGAGACCGCCTGGGAATACCAGGTGCTGTAAGCT
1221	seq1	4	38872084	38872202	minus	GCTTACGGCCATACCACCCTGGAAATGCCCGATCTCATCTGAACTCGGAAGTAAAGCAGGGTCGGGCCTGGTTAGTACTTGGATGGGAGACCGCCTGGGAATACCAGGTGCTGTAAGCT
1222	seq1	4	38872261	38872379	minus	GCTTACGGCCATACCACCCTGGAAATGCCCGATCTCATCTGAACTCGGAAGTAAAGCAGGGTCGGGCCTGGTTAGTACTTGGATGGGAGACCGCCTGGGAATACCAGGTGCTGTAAGCT
1223	seq1	4	38872438	38872556	minus	GCTTACGGCCATACCACCCTGGAAATGCCCGATCTCATCTGAACTCGGAAGTAAAGCAGGGTCGGGCCTGGTTAGTACTTGGATGGGAGACCGCCTGGGAATACCAGGTGCTGTAAGCT
1224	seq1	4	38872615	38872733	minus	GCTTACGGCCATACCACCCTGGAAATGCCCGATCTCATCTGAACTCGGAAGTAAAGCAGGGTCGGGCCTGGTTAGTACTTGGATGGGAGACCGCCTGGGAATACCAGGTGCTGTAAGCT
1225	seq1	4	38872792	38872910	minus	GCTTACGGCCATACCACCCTGGAAATGCCCGATCTCATCTGAACTCGGAAGTAAAGCAGGGTCGGGCCTGGTTAGTACTTGGATGGGAGACCGCCTGGGAATACCAGGTGCTGTAAGCT
1226	seq1	4	38872969	38873087	minus	GCTTACGGCCATACCACCCTGGAAATGCCCGATCTCATCTGAACTCGGAAGTAAAGCAGGGTCGGGCCTGGTTAGTACTTGGATGGGAGACCGCCTGGGAATACCAGGTGCTGTAAGCT
1227	seq1	4	38873146	38873264	minus	GCTTACGGCCATACCACCCTGGAAATGCCCGATCTCATCTGAACTCGGAAGTAAAGCAGGGTCGGGCCTGGTTAGTACTTGGATGGGAGACCGCCTGGGAATACCAGGTGCTGTAAGCT
1228	seq1	4	38873323	38873441	minus	GCTTACGGCCATACCACCCTGGAAATGCCCGATCTCATCTGAACTCGGAAGTAAAGCAGGGTCGGGCCTGGTTAGTACTTGGATGGGAGACCGCCTGGGAATACCAGGTGCTGTAAGCT
1229	seq1	4	38873500	38873618	minus	GCTTACGGCCATACCACCCTGGAAATGCCCGATCTCATCTGAACTCGGAAGTAAAGCAGGGTCGGGCCTGGTTAGTACTTGGATGGGAGACCGCCTGGGAATACCAGGTGCTGTAAGCT
1230	seq1	4	38873677	38873795	minus	GCTTACGGCCATACCACCCTGGAAATGCCCGATCTCATCTGAACTCGGAAGTAAAGCAGGGTCGGGCCTGGTTAGTACTTGGATGGGAGACCGCCTGGGAATACCAGGTGCTGTAAGCT
1231	seq1	4	38873854	38873972	minus	GCTTACGGCCATACCACCCTGGAAATGCCCGATCTCATCTGAACTCGGAAGTAAAGCAGGGTCGGGCCTGGTTAGTACTTGGATGGGAGACCGCCTGGGAATACCAGGTGCTGTAAGCT
1232	seq1	4	38874031	38874149	minus	GCTTACGGCCATACCACCCTGGAAATGCCCGATCTCATCTGAACTCGGAAGTAAAGCAGGGTCGGGCCTGGTTAGTACTTGGATGGGAGACCGCCTGGGAATACCAGGTGCTGTAAGCT
1233	seq1	4	38874208	38874326	minus	GCTTACGGCCATACCACCCTGGAAATGCCCGATCTCATCTGAACTCGGAAGTAAAGCAGGGTCGGGCCTGGTTAGTACTTGGATGGGAGACCGCCTGGGAATACCAGGTGCTGTAAGCT
1234	seq1	4	38874385	38874503	minus	GCTTACGGCCATACCACCCTGGAAATGCCCGATCTCATCTGAACTCGGAAGTAAAGCAGGGTCGGGCCTGGTTAGTACTTGGATGGGAGACCGCCTGGGAATACCAGGTGCTGTAAGCT
1235	seq1	4	38874562	38874680	minus	GCTTACGGCCATACCACCCTGGAAATGCCCGATCTCATCTGAACTCGGAAGTAAAGCAGGGTCGGGCCTGGTTAGTACTTGGATGGGAGACCGCCTGGGAATACCAGGTGCTGTAAGCT
1236	seq1	4	38874739	38874857	minus	GCTTACGGCCATACCACCCTGGAAATGCCCGATCTCATCTGAACTCGGAAGTAAAGCAGGGTCGGGCCTGGTTAGTACTTGGATGGGAGACCGCCTGGGAATACCAGGTGCTGTAAGCT
1237	seq1	4	38874916	38875034	minus	GCTTACGGCCATACCACCCTGGAAATGCCCGATCTCATCTGAACTCGGAAGTAAAGCAGGGTCGGGCCTGGTTAGTACTTGGATGGGAGACCGCCTGGGAATACCAGGTGCTGTAAGCT
1238	seq1	4	38875093	38875211	minus	GCTTACGGCCATACCACCCTGGAAATGCCCGATCTCATCTGAACTCGGAAGTAAAGCAGGGTCGGGCCTGGTTAGTACTTGGATGGGAGACCGCCTGGGAATACCAGGTGCTGTAAGCT
1239	seq1	4	38875270	38875388	minus	GCTTACGGCCATACCACCCTGGAAATGCCCGATCTCATCTGAACTCGGAAGTAAAGCAGGGTCGGGCCTGGTTAGTACTTGGATGGGAGACCGCCTGGGAATACCAGGTGCTGTAAGCT
1240	seq1	4	38875447	38875565	minus	GCTTACGGCCATACCACCCTGGAAATGCCCGATCTCATCTGAACTCGGAAGTAAAGCAGGGTCGGGCCTGGTTAGTACTTGGATGGGAGACCGCCTGGGAATACCAGGTGCTGTAAGCT
1241	seq1	4	38875624	38875742	minus	GCTTACGGCCATACCACCCTGGAAATGCCCGATCTCATCTGAACTCGGAAGTAAAGCAGGGTCGGGCCTGGTTAGTACTTGGATGGGAGACCGCCTGGGAATACCAGGTGCTGTAAGCT
1242	seq1	4	38875801	38875919	minus	GCTTACGGCCATACCACCCTGGAAATGCCCGATCTCATCTGAACTCGGAAGTAAAGCAGGGTCGGGCCTGGTTAGTACTTGGATGGGAGACCGCCTGGGAATACCAGGTGCTGTAAGCT
1243	seq1	4	38875978	38876096	minus	GCTTACGGCCATACCACCCTGGAAATGCCCGATCTCATCTGAACTCGGAAGTAAAGCAGGGTCGGGCCTGGTTAGTACTTGGATGGGAGACCGCCTGGGAATACCAGGTGCTGTAAGCT
1244	seq1	4	38876155	38876273	minus	GCTTACGGCCATACCACCCTGGAAATGCCCGATCTCATCTGAACTCGGAAGTAAAGCAGGGTCGGGCCTGGTTAGTACTTGGATGGGAGACCGCCTGGGAATACCAGGTGCTGTAAGCT
1245	seq1	4	38876332	38876450	minus	GCTTACGGCCATACCACCCTGGAAATGCCCGATCTCATCTGAACTCGGAAGTAAAGCAGGGTCGGGCCTGGTTAGTACTTGGATGGGAGACCGCCTGGGAATACCAGGTGCTGTAAGCT
1246	seq1	4	38876509	38876627	minus	GCTTACGGCCATACCACCCTGGAAATGCCCGATCTCATCTGAACTCGGAAGTAAAGCAGGGTCGGGCCTGGTTAGTACTTGGATGGGAGACCGCCTGGGAATACCAGGTGCTGTAAGCT
1247	seq1	4	38876686	38876804	minus	GCTTACGGCCATACCACCCTGGAAATGCCCGATCTCATCTGAACTCGGAAGTAAAGCAGGGTCGGGCCTGGTTAGTACTTGGATGGGAGACCGCCTGGGAATACCAGGTGCTGTAAGCT
1248	seq1	4	38876863	38876981	minus	GCTTACGGCCATACCACCCTGGAAATGCCCGATCTCATCTGAACTCGGAAGTAAAGCAGGGTCGGGCCTGGTTAGTACTTGGATGGGAGACCGCCTGGGAATACCAGGTGCTGTAAGCT
1249	seq1	4	38877040	38877158	minus	GCTTACGGCCATACCACCCTGGAAATGCCCGATCTCATCTGAACTCGGAAGTAAAGCAGGGTCGGGCCTGGTTAGTACTTGGATGGGAGACCGCCTGGGAATACCAGGTGCTGTAAGCT
1250	seq1	4	38877217	38877335	minus	GCTTACGGCCATACCACCCTGGAAATGCCCGATCTCATCTGAACTCGGAAGTAAAGCAGGGTCGGGCCTGGTTAGTACTTGGATGGGAGACCGCCTGGGAATACCAGGTGCTGTAAGCT
1251	seq17	4	38877394	38877512	minus	GCTTACGGCCATACCACCCTGGAAATGCCCGATCTCATCTGAACTCGGAAGTAAAGCAGGGTCGGGCCTGGTTAGTACTTGGATGGGAGACCGCCTGGGAATACCAGGTGCTTTAAGCT
1252	seq34	4	38877571	38877689	minus	GCTTACGGCCATACCACCCTGGAAATGCCCGATCTCATCTGAACTCGGAAGTAAAGCAGGGTCGGGCCTGGTTAGTACTTGAATGGGAGACCGCCTGGGAATACCAGGTGCTGTAAGCT
1253	seq1	4	38877748	38877866	minus	GCTTACGGCCATACCACCCTGGAAATGCCCGATCTCATCTGAACTCGGAAGTAAAGCAGGGTCGGGCCTGGTTAGTACTTGGATGGGAGACCGCCTGGGAATACCAGGTGCTGTAAGCT
1254	seq1	4	38877925	38878043	minus	GCTTACGGCCATACCACCCTGGAAATGCCCGATCTCATCTGAACTCGGAAGTAAAGCAGGGTCGGGCCTGGTTAGTACTTGGATGGGAGACCGCCTGGGAATACCAGGTGCTGTAAGCT
1255	seq34	4	38878102	38878220	minus	GCTTACGGCCATACCACCCTGGAAATGCCCGATCTCATCTGAACTCGGAAGTAAAGCAGGGTCGGGCCTGGTTAGTACTTGAATGGGAGACCGCCTGGGAATACCAGGTGCTGTAAGCT
1256	seq1	4	38878279	38878397	minus	GCTTACGGCCATACCACCCTGGAAATGCCCGATCTCATCTGAACTCGGAAGTAAAGCAGGGTCGGGCCTGGTTAGTACTTGGATGGGAGACCGCCTGGGAATACCAGGTGCTGTAAGCT
1257		4	38878456	38878574	minus	GCTTACGGCCATACCACCCTGGAAATGCCCGATCTCATCTGAACTCGGAAGTAAAGCAGGGACGGGCCTGGTTAGTACTTGAATGGGAGACCGCCTGGGAATACCAGGTGCTGTAAGCT
1258	seq35	4	38878633	38878751	minus	GCTTACGGCCATACCACCCTGGAACTGCCCGATCTCATCTGAACTCGGAAGTAAAGCAGGGTCGGGCCTGGTTAGTACTTGGATGGGAGACCGCCTGGGAATACCAGGTGCTGTAAGCT
1259	seq1	4	38878810	38878928	minus	GCTTACGGCCATACCACCCTGGAAATGCCCGATCTCATCTGAACTCGGAAGTAAAGCAGGGTCGGGCCTGGTTAGTACTTGGATGGGAGACCGCCTGGGAATACCAGGTGCTGTAAGCT
1260	seq1	4	38878987	38879105	minus	GCTTACGGCCATACCACCCTGGAAATGCCCGATCTCATCTGAACTCGGAAGTAAAGCAGGGTCGGGCCTGGTTAGTACTTGGATGGGAGACCGCCTGGGAATACCAGGTGCTGTAAGCT
1261		4	38879164	38879283	minus	GCTTACGGCCATACCACCCTGGAAATGCCCGATCTCATCTGAACTCGGAAGTAAAGCAGGGTCGGGCCTGGTTAGTACTTGGAATGGGAGACCGCCTGGGAATACCAGGTGCTGTAAGCT
1262	seq1	4	38879343	38879461	minus	GCTTACGGCCATACCACCCTGGAAATGCCCGATCTCATCTGAACTCGGAAGTAAAGCAGGGTCGGGCCTGGTTAGTACTTGGATGGGAGACCGCCTGGGAATACCAGGTGCTGTAAGCT
1263	seq1	4	38879520	38879638	minus	GCTTACGGCCATACCACCCTGGAAATGCCCGATCTCATCTGAACTCGGAAGTAAAGCAGGGTCGGGCCTGGTTAGTACTTGGATGGGAGACCGCCTGGGAATACCAGGTGCTGTAAGCT
1264	seq9	4	38879697	38879815	minus	GCTTACGGCCATACCACCCTGGAAATGCCCGATCTCATCTGAACTCGGAAGTAAAGCAGGGTCGGACCTGGTTAGTACTTGGATGGGAGACCGCCTGGGAATACCAGGTGCTGTAAGCT
1265	seq1	4	38879874	38879992	minus	GCTTACGGCCATACCACCCTGGAAATGCCCGATCTCATCTGAACTCGGAAGTAAAGCAGGGTCGGGCCTGGTTAGTACTTGGATGGGAGACCGCCTGGGAATACCAGGTGCTGTAAGCT
1266	seq1	4	38885874	38885992	minus	GCTTACGGCCATACCACCCTGGAAATGCCCGATCTCATCTGAACTCGGAAGTAAAGCAGGGTCGGGCCTGGTTAGTACTTGGATGGGAGACCGCCTGGGAATACCAGGTGCTGTAAGCT
1267	seq1	4	38886051	38886169	minus	GCTTACGGCCATACCACCCTGGAAATGCCCGATCTCATCTGAACTCGGAAGTAAAGCAGGGTCGGGCCTGGTTAGTACTTGGATGGGAGACCGCCTGGGAATACCAGGTGCTGTAAGCT
1268	seq36	4	38886228	38886346	minus	GCTTACGGCCATACCACCCTGGAAATGCCCGATCTCATCTGAACTCAGAAGTAAAGCAGGGTCGGGCCTGGTTAGTACTTGGATGGGAGACCGCCTGGGAATACCAGGTGCTGTAAGCT
1269	seq1	4	38886405	38886523	minus	GCTTACGGCCATACCACCCTGGAAATGCCCGATCTCATCTGAACTCGGAAGTAAAGCAGGGTCGGGCCTGGTTAGTACTTGGATGGGAGACCGCCTGGGAATACCAGGTGCTGTAAGCT
1270		4	38886582	38886694	minus	AAAAAAAAAAAAATGGAAATGCCCGATCTCATCTGAACTCGGAAGTAAAGCAGGGTCGGGCCTGGTTAGTACTTGGATGGGAGACCGCCTGGGAATACCAGGTGCTGTAAGCT
1271		4	38892427	38892545	minus	GCTTACGGCCATACCACCCTGGAAATGCCCGATCTCATCTGAACTCGGAAGTTAAGCAGGGTCGGGCCTGGTCAGTACTTGGATGGGAGACCGCCTGGGAATACCAGGTGCTGTAAGCT
1272	seq37	4	38892725	38892843	minus	GCTTACGGCCATACCACCCTGGAAATGCCCGATCTCATCTGAACTCGGAAGTAAAGCAGGGTCGGGCCTGGTCAGTACTTGGATGGGAGACCGCCTGGGAATACCAGGTGCTGTAAGCT
1273		4	38893023	38893141	minus	GCTTACGGCCGTACCACCCTGGAAATGCTCGATCTCATCTGAACTCGGAAGTAAAGCAGGGTCGGGCCTGGTCAGTACTTGGATGGGAGACCGCCTGGGAATACCAGGTGCTGTAAGCT
1274	seq37	4	38893321	38893439	minus	GCTTACGGCCATACCACCCTGGAAATGCCCGATCTCATCTGAACTCGGAAGTAAAGCAGGGTCGGGCCTGGTCAGTACTTGGATGGGAGACCGCCTGGGAATACCAGGTGCTGTAAGCT
1275		4	38893619	38893737	minus	GCTTACGGCCATACCACCCTGGAAATGCCCGATCTCATCTGAACTCGGAAGTAAAGCAGGGTCGGGACTGGTCAGTACTTGGATGGGAGACCGCCTGGGAATACCAGGTGCTGTAAGCT
1276	seq37	4	38893917	38894035	minus	GCTTACGGCCATACCACCCTGGAAATGCCCGATCTCATCTGAACTCGGAAGTAAAGCAGGGTCGGGCCTGGTCAGTACTTGGATGGGAGACCGCCTGGGAATACCAGGTGCTGTAAGCT
1277		4	38894215	38894333	minus	GCTTACGGCCGTACCACCCTGGAAATGCTCGATCTCATCTGAACTCGGAAGTAAAGCAGGGTCGGGCCTGGTCAGTACTTGGATGGGAGACCGCCTGGGAATACCAGGTGCTGTAAGCT
1278	seq37	4	38894513	38894631	minus	GCTTACGGCCATACCACCCTGGAAATGCCCGATCTCATCTGAACTCGGAAGTAAAGCAGGGTCGGGCCTGGTCAGTACTTGGATGGGAGACCGCCTGGGAATACCAGGTGCTGTAAGCT
1279	seq37	4	38894811	38894929	minus	GCTTACGGCCATACCACCCTGGAAATGCCCGATCTCATCTGAACTCGGAAGTAAAGCAGGGTCGGGCCTGGTCAGTACTTGGATGGGAGACCGCCTGGGAATACCAGGTGCTGTAAGCT
1280		4	38895108	38895226	minus	GCTTACGGCCATACCACCCTGGAAATGCCCGATCTCATCTGAACTCGGAAGTAAAGCAGGGTCGGGCCTGGTCAGTACTTGGATGGGAGACCGCCTGGGTATACCAGGTGCTGTAAGCT
1281	seq37	4	38895406	38895524	minus	GCTTACGGCCATACCACCCTGGAAATGCCCGATCTCATCTGAACTCGGAAGTAAAGCAGGGTCGGGCCTGGTCAGTACTTGGATGGGAGACCGCCTGGGAATACCAGGTGCTGTAAGCT
1282		4	38895703	38895822	minus	GCCTATTAAAAAATTAGAAATGGAAATGCCCGATCTCATCTGAACTCGGAAGTAAAGCAGGGTCGGGCCTGGTTAGTACTTGGATGGGAGACCGCCTGGGTATACCAGGTGCTGTAAGCT
1283		4	39121518	39121622	minus	CACCCAGGAAATGCCCGATCTCATCTGAACTCGGAAGTAAAGCAGGGTCGGGCCTGGTTAGTACTTGGATGGGAGACCGCCTGGGAATACCAGGTGCTGTAAGCT
1284		4	39176168	39176285	minus	AGCTGGCAGCTAGCTCTCTGCAACTCTCACATGGCCGCCCACTGAAGCTAAACAGGGCTGCGCCCGGTCAGTACCTGGATGGGAGACCACATGGGAAAGCTAGGTTGCTGCCGGAAGT
1285		4	39297145	39297268	plus	TTGAAAGCCGGCAGCTAGCTCTCTGCAACTCTCACATGGTTGCCCACTGAAGCTAAGCAGGGCTGCGCCCGGTCAGTACCTGGATGGGAGACCACATGGGAAAGCTAGGTTGCTGCCGGAAGTG
1286		4	39703867	39703985	minus	GCTTACGGCCACACCACCCTGGAAATGCCTGATCTCATCTGAACTCGGAAGTAAAGCAGGGTCGGGCCTGGTTAGTACTTGGATGGGAGACCGCCTGGGAATACCAGGTGCTGTAAGCT
1287	seq31	4	39704044	39704162	minus	GCTTACGGCCACACCACCCTGGAAATGCCCGATCTCATCTGAACTCGGAAGTAAAGCAGGGTCGGGCCTGGTTAGTACTTGGATGGGAGACCGCCTGGGAATACCAGGTGCTGTAAGCT
1288	seq31	4	39704221	39704339	minus	GCTTACGGCCACACCACCCTGGAAATGCCCGATCTCATCTGAACTCGGAAGTAAAGCAGGGTCGGGCCTGGTTAGTACTTGGATGGGAGACCGCCTGGGAATACCAGGTGCTGTAAGCT
1289		4	39704398	39704516	minus	GCTAACGGCCACACCACCCTGGAAATGCCCGATCTCATCTGAACTCGGAAGTAAAGCAGGGTCGGGCCTGGTTAGTACTTGGATGGGAGACCGCCTGGGAATACCAGGTGCTGTAAGCT
1290	seq31	4	39704575	39704693	minus	GCTTACGGCCACACCACCCTGGAAATGCCCGATCTCATCTGAACTCGGAAGTAAAGCAGGGTCGGGCCTGGTTAGTACTTGGATGGGAGACCGCCTGGGAATACCAGGTGCTGTAAGCT
1291	seq31	4	39704752	39704870	minus	GCTTACGGCCACACCACCCTGGAAATGCCCGATCTCATCTGAACTCGGAAGTAAAGCAGGGTCGGGCCTGGTTAGTACTTGGATGGGAGACCGCCTGGGAATACCAGGTGCTGTAAGCT
1292		4	39704929	39705047	minus	GCTTACGGCCACACCACCCTGGAAATGCCCGATCTCATCTGAACTCGGAAGTAAAGCAGGGTCGGGCCTGGTTAGTACTTGGATGGGAGACCGCCTGGGAATACCAGGTCCTGTAAGCT
1293	seq31	4	39705106	39705224	minus	GCTTACGGCCACACCACCCTGGAAATGCCCGATCTCATCTGAACTCGGAAGTAAAGCAGGGTCGGGCCTGGTTAGTACTTGGATGGGAGACCGCCTGGGAATACCAGGTGCTGTAAGCT
1294	seq31	4	39705283	39705401	minus	GCTTACGGCCACACCACCCTGGAAATGCCCGATCTCATCTGAACTCGGAAGTAAAGCAGGGTCGGGCCTGGTTAGTACTTGGATGGGAGACCGCCTGGGAATACCAGGTGCTGTAAGCT
1295	seq31	4	39705460	39705578	minus	GCTTACGGCCACACCACCCTGGAAATGCCCGATCTCATCTGAACTCGGAAGTAAAGCAGGGTCGGGCCTGGTTAGTACTTGGATGGGAGACCGCCTGGGAATACCAGGTGCTGTAAGCT
1296	seq31	4	39705637	39705755	minus	GCTTACGGCCACACCACCCTGGAAATGCCCGATCTCATCTGAACTCGGAAGTAAAGCAGGGTCGGGCCTGGTTAGTACTTGGATGGGAGACCGCCTGGGAATACCAGGTGCTGTAAGCT
1297	seq31	4	39705814	39705932	minus	GCTTACGGCCACACCACCCTGGAAATGCCCGATCTCATCTGAACTCGGAAGTAAAGCAGGGTCGGGCCTGGTTAGTACTTGGATGGGAGACCGCCTGGGAATACCAGGTGCTGTAAGCT
1298	seq31	4	39705991	39706109	minus	GCTTACGGCCACACCACCCTGGAAATGCCCGATCTCATCTGAACTCGGAAGTAAAGCAGGGTCGGGCCTGGTTAGTACTTGGATGGGAGACCGCCTGGGAATACCAGGTGCTGTAAGCT
1299		4	39706168	39706286	minus	GCTTACGGCCACACCACCCTGGAAATGCCTGATCTCATCTGAACTCGGAAGTAAAGCAGGGTCGGGCCTGGTTAGTACTTGGATGGGAGACCGCCTGGGAATACCAGGTGCTGTAAGCT
1300	seq31	4	39706345	39706463	minus	GCTTACGGCCACACCACCCTGGAAATGCCCGATCTCATCTGAACTCGGAAGTAAAGCAGGGTCGGGCCTGGTTAGTACTTGGATGGGAGACCGCCTGGGAATACCAGGTGCTGTAAGCT
1301	seq31	4	39706522	39706640	minus	GCTTACGGCCACACCACCCTGGAAATGCCCGATCTCATCTGAACTCGGAAGTAAAGCAGGGTCGGGCCTGGTTAGTACTTGGATGGGAGACCGCCTGGGAATACCAGGTGCTGTAAGCT
1302	seq31	4	39706699	39706817	minus	GCTTACGGCCACACCACCCTGGAAATGCCCGATCTCATCTGAACTCGGAAGTAAAGCAGGGTCGGGCCTGGTTAGTACTTGGATGGGAGACCGCCTGGGAATACCAGGTGCTGTAAGCT
1303	seq31	4	39706876	39706994	minus	GCTTACGGCCACACCACCCTGGAAATGCCCGATCTCATCTGAACTCGGAAGTAAAGCAGGGTCGGGCCTGGTTAGTACTTGGATGGGAGACCGCCTGGGAATACCAGGTGCTGTAAGCT
1304	seq31	4	39707053	39707171	minus	GCTTACGGCCACACCACCCTGGAAATGCCCGATCTCATCTGAACTCGGAAGTAAAGCAGGGTCGGGCCTGGTTAGTACTTGGATGGGAGACCGCCTGGGAATACCAGGTGCTGTAAGCT
1305	seq31	4	39707230	39707348	minus	GCTTACGGCCACACCACCCTGGAAATGCCCGATCTCATCTGAACTCGGAAGTAAAGCAGGGTCGGGCCTGGTTAGTACTTGGATGGGAGACCGCCTGGGAATACCAGGTGCTGTAAGCT
1306	seq31	4	39707407	39707525	minus	GCTTACGGCCACACCACCCTGGAAATGCCCGATCTCATCTGAACTCGGAAGTAAAGCAGGGTCGGGCCTGGTTAGTACTTGGATGGGAGACCGCCTGGGAATACCAGGTGCTGTAAGCT
1307	seq31	4	39707584	39707702	minus	GCTTACGGCCACACCACCCTGGAAATGCCCGATCTCATCTGAACTCGGAAGTAAAGCAGGGTCGGGCCTGGTTAGTACTTGGATGGGAGACCGCCTGGGAATACCAGGTGCTGTAAGCT
1308	seq31	4	39707761	39707879	minus	GCTTACGGCCACACCACCCTGGAAATGCCCGATCTCATCTGAACTCGGAAGTAAAGCAGGGTCGGGCCTGGTTAGTACTTGGATGGGAGACCGCCTGGGAATACCAGGTGCTGTAAGCT
1309	seq31	4	39707938	39708056	minus	GCTTACGGCCACACCACCCTGGAAATGCCCGATCTCATCTGAACTCGGAAGTAAAGCAGGGTCGGGCCTGGTTAGTACTTGGATGGGAGACCGCCTGGGAATACCAGGTGCTGTAAGCT
1310	seq31	4	39708115	39708233	minus	GCTTACGGCCACACCACCCTGGAAATGCCCGATCTCATCTGAACTCGGAAGTAAAGCAGGGTCGGGCCTGGTTAGTACTTGGATGGGAGACCGCCTGGGAATACCAGGTGCTGTAAGCT
1311	seq31	4	39708292	39708410	minus	GCTTACGGCCACACCACCCTGGAAATGCCCGATCTCATCTGAACTCGGAAGTAAAGCAGGGTCGGGCCTGGTTAGTACTTGGATGGGAGACCGCCTGGGAATACCAGGTGCTGTAAGCT
1312	seq31	4	39708469	39708587	minus	GCTTACGGCCACACCACCCTGGAAATGCCCGATCTCATCTGAACTCGGAAGTAAAGCAGGGTCGGGCCTGGTTAGTACTTGGATGGGAGACCGCCTGGGAATACCAGGTGCTGTAAGCT
1313	seq31	4	39708646	39708764	minus	GCTTACGGCCACACCACCCTGGAAATGCCCGATCTCATCTGAACTCGGAAGTAAAGCAGGGTCGGGCCTGGTTAGTACTTGGATGGGAGACCGCCTGGGAATACCAGGTGCTGTAAGCT
1314	seq31	4	39708823	39708941	minus	GCTTACGGCCACACCACCCTGGAAATGCCCGATCTCATCTGAACTCGGAAGTAAAGCAGGGTCGGGCCTGGTTAGTACTTGGATGGGAGACCGCCTGGGAATACCAGGTGCTGTAAGCT
1315	seq31	4	39709000	39709118	minus	GCTTACGGCCACACCACCCTGGAAATGCCCGATCTCATCTGAACTCGGAAGTAAAGCAGGGTCGGGCCTGGTTAGTACTTGGATGGGAGACCGCCTGGGAATACCAGGTGCTGTAAGCT
1316	seq31	4	39709177	39709295	minus	GCTTACGGCCACACCACCCTGGAAATGCCCGATCTCATCTGAACTCGGAAGTAAAGCAGGGTCGGGCCTGGTTAGTACTTGGATGGGAGACCGCCTGGGAATACCAGGTGCTGTAAGCT
1317	seq31	4	39709354	39709472	minus	GCTTACGGCCACACCACCCTGGAAATGCCCGATCTCATCTGAACTCGGAAGTAAAGCAGGGTCGGGCCTGGTTAGTACTTGGATGGGAGACCGCCTGGGAATACCAGGTGCTGTAAGCT
1318	seq31	4	39709531	39709649	minus	GCTTACGGCCACACCACCCTGGAAATGCCCGATCTCATCTGAACTCGGAAGTAAAGCAGGGTCGGGCCTGGTTAGTACTTGGATGGGAGACCGCCTGGGAATACCAGGTGCTGTAAGCT
1319	seq31	4	39709708	39709826	minus	GCTTACGGCCACACCACCCTGGAAATGCCCGATCTCATCTGAACTCGGAAGTAAAGCAGGGTCGGGCCTGGTTAGTACTTGGATGGGAGACCGCCTGGGAATACCAGGTGCTGTAAGCT
1320	seq31	4	39709885	39710003	minus	GCTTACGGCCACACCACCCTGGAAATGCCCGATCTCATCTGAACTCGGAAGTAAAGCAGGGTCGGGCCTGGTTAGTACTTGGATGGGAGACCGCCTGGGAATACCAGGTGCTGTAAGCT
1321	seq31	4	39710062	39710180	minus	GCTTACGGCCACACCACCCTGGAAATGCCCGATCTCATCTGAACTCGGAAGTAAAGCAGGGTCGGGCCTGGTTAGTACTTGGATGGGAGACCGCCTGGGAATACCAGGTGCTGTAAGCT
1322	seq31	4	39710239	39710357	minus	GCTTACGGCCACACCACCCTGGAAATGCCCGATCTCATCTGAACTCGGAAGTAAAGCAGGGTCGGGCCTGGTTAGTACTTGGATGGGAGACCGCCTGGGAATACCAGGTGCTGTAAGCT
1323	seq31	4	39710416	39710534	minus	GCTTACGGCCACACCACCCTGGAAATGCCCGATCTCATCTGAACTCGGAAGTAAAGCAGGGTCGGGCCTGGTTAGTACTTGGATGGGAGACCGCCTGGGAATACCAGGTGCTGTAAGCT
1324	seq31	4	39710593	39710711	minus	GCTTACGGCCACACCACCCTGGAAATGCCCGATCTCATCTGAACTCGGAAGTAAAGCAGGGTCGGGCCTGGTTAGTACTTGGATGGGAGACCGCCTGGGAATACCAGGTGCTGTAAGCT
1325	seq31	4	39710770	39710888	minus	GCTTACGGCCACACCACCCTGGAAATGCCCGATCTCATCTGAACTCGGAAGTAAAGCAGGGTCGGGCCTGGTTAGTACTTGGATGGGAGACCGCCTGGGAATACCAGGTGCTGTAAGCT
1326	seq31	4	39710947	39711065	minus	GCTTACGGCCACACCACCCTGGAAATGCCCGATCTCATCTGAACTCGGAAGTAAAGCAGGGTCGGGCCTGGTTAGTACTTGGATGGGAGACCGCCTGGGAATACCAGGTGCTGTAAGCT
1327	seq31	4	39711124	39711242	minus	GCTTACGGCCACACCACCCTGGAAATGCCCGATCTCATCTGAACTCGGAAGTAAAGCAGGGTCGGGCCTGGTTAGTACTTGGATGGGAGACCGCCTGGGAATACCAGGTGCTGTAAGCT
1328		4	39904846	39904960	minus	GCCGGCAGCTAGCTCTCTGCAACTCTCACATGGCCGCCCACTGAAGCTAAACAGGGCTGTTCCCGGTCAGTACCTGAATGGGAGATCACATGGGAAAGATAGGTTGCTGCTGGAA
1329		4	40073673	40073795	plus	CTTTAGCCGGCAGCTAGCTCTCTGCAACTCTCACATGGTCGCCCACTGAAGCTAAGCAGGGCTGCGCCCGGTCAGTACCTGGATGGGAGACCACATGGGAAAGCTAGGTTGCTGCCGGAAGTG
1330	seq38	4	40203038	40203155	minus	GCTTACGGCCATACCACCCTGGAAATGCCCGATCTCATCTGAACTCGGAAGTAAAGCAGGGTCGGCCTGGTTAGTACTTGGATGGGAGACCGCCTGGCAATACCAGGTGCTGTAAGCT
1331	seq1	4	41346760	41346878	minus	GCTTACGGCCATACCACCCTGGAAATGCCCGATCTCATCTGAACTCGGAAGTAAAGCAGGGTCGGGCCTGGTTAGTACTTGGATGGGAGACCGCCTGGGAATACCAGGTGCTGTAAGCT
1332	seq1	4	41346937	41347055	minus	GCTTACGGCCATACCACCCTGGAAATGCCCGATCTCATCTGAACTCGGAAGTAAAGCAGGGTCGGGCCTGGTTAGTACTTGGATGGGAGACCGCCTGGGAATACCAGGTGCTGTAAGCT
1333	seq1	4	41347114	41347232	minus	GCTTACGGCCATACCACCCTGGAAATGCCCGATCTCATCTGAACTCGGAAGTAAAGCAGGGTCGGGCCTGGTTAGTACTTGGATGGGAGACCGCCTGGGAATACCAGGTGCTGTAAGCT
1334		4	41347291	41347406	minus	TACGGCCATACCACCCTGGAAATGCCCGATCTCATCTGAACTCGGAAGTAAAGCAGGGTCGGGCCTGGTTAGTACTTGGATGGGAGACCGCCTGGGAATACCAGGTGCTGTAAGCT
1335	seq1	4	41347468	41347586	minus	GCTTACGGCCATACCACCCTGGAAATGCCCGATCTCATCTGAACTCGGAAGTAAAGCAGGGTCGGGCCTGGTTAGTACTTGGATGGGAGACCGCCTGGGAATACCAGGTGCTGTAAGCT
1336	seq1	4	41347645	41347763	minus	GCTTACGGCCATACCACCCTGGAAATGCCCGATCTCATCTGAACTCGGAAGTAAAGCAGGGTCGGGCCTGGTTAGTACTTGGATGGGAGACCGCCTGGGAATACCAGGTGCTGTAAGCT
1337	seq1	4	41347822	41347940	minus	GCTTACGGCCATACCACCCTGGAAATGCCCGATCTCATCTGAACTCGGAAGTAAAGCAGGGTCGGGCCTGGTTAGTACTTGGATGGGAGACCGCCTGGGAATACCAGGTGCTGTAAGCT
1338	seq1	4	41347999	41348117	minus	GCTTACGGCCATACCACCCTGGAAATGCCCGATCTCATCTGAACTCGGAAGTAAAGCAGGGTCGGGCCTGGTTAGTACTTGGATGGGAGACCGCCTGGGAATACCAGGTGCTGTAAGCT
1339	seq1	4	41348176	41348294	minus	GCTTACGGCCATACCACCCTGGAAATGCCCGATCTCATCTGAACTCGGAAGTAAAGCAGGGTCGGGCCTGGTTAGTACTTGGATGGGAGACCGCCTGGGAATACCAGGTGCTGTAAGCT
1340	seq1	4	41348353	41348471	minus	GCTTACGGCCATACCACCCTGGAAATGCCCGATCTCATCTGAACTCGGAAGTAAAGCAGGGTCGGGCCTGGTTAGTACTTGGATGGGAGACCGCCTGGGAATACCAGGTGCTGTAAGCT
1341	seq1	4	41348530	41348648	minus	GCTTACGGCCATACCACCCTGGAAATGCCCGATCTCATCTGAACTCGGAAGTAAAGCAGGGTCGGGCCTGGTTAGTACTTGGATGGGAGACCGCCTGGGAATACCAGGTGCTGTAAGCT
1342		4	41348707	41348822	minus	TACGGCCATACCACCCTGGAAATGCCCGATCTCATCTGAACTCGGAAGTAAAGCAGGGTCGGGCCTGGTTAGTACTTGGATGGGAGACCGCCTGGGAATACCAGGTGCTGTAAGCT
1343	seq1	4	41348884	41349002	minus	GCTTACGGCCATACCACCCTGGAAATGCCCGATCTCATCTGAACTCGGAAGTAAAGCAGGGTCGGGCCTGGTTAGTACTTGGATGGGAGACCGCCTGGGAATACCAGGTGCTGTAAGCT
1344	seq1	4	41349061	41349179	minus	GCTTACGGCCATACCACCCTGGAAATGCCCGATCTCATCTGAACTCGGAAGTAAAGCAGGGTCGGGCCTGGTTAGTACTTGGATGGGAGACCGCCTGGGAATACCAGGTGCTGTAAGCT
1345	seq1	4	41349238	41349356	minus	GCTTACGGCCATACCACCCTGGAAATGCCCGATCTCATCTGAACTCGGAAGTAAAGCAGGGTCGGGCCTGGTTAGTACTTGGATGGGAGACCGCCTGGGAATACCAGGTGCTGTAAGCT
1346	seq1	4	41349415	41349533	minus	GCTTACGGCCATACCACCCTGGAAATGCCCGATCTCATCTGAACTCGGAAGTAAAGCAGGGTCGGGCCTGGTTAGTACTTGGATGGGAGACCGCCTGGGAATACCAGGTGCTGTAAGCT
1347	seq1	4	41349592	41349710	minus	GCTTACGGCCATACCACCCTGGAAATGCCCGATCTCATCTGAACTCGGAAGTAAAGCAGGGTCGGGCCTGGTTAGTACTTGGATGGGAGACCGCCTGGGAATACCAGGTGCTGTAAGCT
1348		4	41349769	41349884	minus	TACGGCCATACCACCCTGGAAATGCCCGATCTCATCTGAACTCGGAAGTAAAGCAGGGTCGGGCCTGGTTAGTACTTGGATGGGAGACCGCCTGGGAATACCAGGTGCTGTAAGCT
1349	seq1	4	41349946	41350064	minus	GCTTACGGCCATACCACCCTGGAAATGCCCGATCTCATCTGAACTCGGAAGTAAAGCAGGGTCGGGCCTGGTTAGTACTTGGATGGGAGACCGCCTGGGAATACCAGGTGCTGTAAGCT
1350	seq1	4	41350123	41350241	minus	GCTTACGGCCATACCACCCTGGAAATGCCCGATCTCATCTGAACTCGGAAGTAAAGCAGGGTCGGGCCTGGTTAGTACTTGGATGGGAGACCGCCTGGGAATACCAGGTGCTGTAAGCT
1351	seq1	4	41350300	41350418	minus	GCTTACGGCCATACCACCCTGGAAATGCCCGATCTCATCTGAACTCGGAAGTAAAGCAGGGTCGGGCCTGGTTAGTACTTGGATGGGAGACCGCCTGGGAATACCAGGTGCTGTAAGCT
1352	seq1	4	41350477	41350595	minus	GCTTACGGCCATACCACCCTGGAAATGCCCGATCTCATCTGAACTCGGAAGTAAAGCAGGGTCGGGCCTGGTTAGTACTTGGATGGGAGACCGCCTGGGAATACCAGGTGCTGTAAGCT
1353	seq1	4	41350654	41350772	minus	GCTTACGGCCATACCACCCTGGAAATGCCCGATCTCATCTGAACTCGGAAGTAAAGCAGGGTCGGGCCTGGTTAGTACTTGGATGGGAGACCGCCTGGGAATACCAGGTGCTGTAAGCT
1354	seq1	4	41350831	41350949	minus	GCTTACGGCCATACCACCCTGGAAATGCCCGATCTCATCTGAACTCGGAAGTAAAGCAGGGTCGGGCCTGGTTAGTACTTGGATGGGAGACCGCCTGGGAATACCAGGTGCTGTAAGCT
1355	seq1	4	41351008	41351126	minus	GCTTACGGCCATACCACCCTGGAAATGCCCGATCTCATCTGAACTCGGAAGTAAAGCAGGGTCGGGCCTGGTTAGTACTTGGATGGGAGACCGCCTGGGAATACCAGGTGCTGTAAGCT
1356	seq1	4	41351185	41351303	minus	GCTTACGGCCATACCACCCTGGAAATGCCCGATCTCATCTGAACTCGGAAGTAAAGCAGGGTCGGGCCTGGTTAGTACTTGGATGGGAGACCGCCTGGGAATACCAGGTGCTGTAAGCT
1357	seq1	4	41351362	41351480	minus	GCTTACGGCCATACCACCCTGGAAATGCCCGATCTCATCTGAACTCGGAAGTAAAGCAGGGTCGGGCCTGGTTAGTACTTGGATGGGAGACCGCCTGGGAATACCAGGTGCTGTAAGCT
1358	seq1	4	41351539	41351657	minus	GCTTACGGCCATACCACCCTGGAAATGCCCGATCTCATCTGAACTCGGAAGTAAAGCAGGGTCGGGCCTGGTTAGTACTTGGATGGGAGACCGCCTGGGAATACCAGGTGCTGTAAGCT
1359	seq1	4	41351750	41351868	minus	GCTTACGGCCATACCACCCTGGAAATGCCCGATCTCATCTGAACTCGGAAGTAAAGCAGGGTCGGGCCTGGTTAGTACTTGGATGGGAGACCGCCTGGGAATACCAGGTGCTGTAAGCT
1360		4	41351927	41352045	minus	GCTTACGGCCATACCACCCTGGAAATGCCCGATCTCATCTGAACTCGGAAGTAAAGCAGGGTTGGGTCTGGTTAGTACTTGGATGGGAGACCGCCTGGGAATATCAGGTGCTGTAAGCT
1361	seq1	4	41352099	41352217	minus	GCTTACGGCCATACCACCCTGGAAATGCCCGATCTCATCTGAACTCGGAAGTAAAGCAGGGTCGGGCCTGGTTAGTACTTGGATGGGAGACCGCCTGGGAATACCAGGTGCTGTAAGCT
1362	seq1	4	41352276	41352394	minus	GCTTACGGCCATACCACCCTGGAAATGCCCGATCTCATCTGAACTCGGAAGTAAAGCAGGGTCGGGCCTGGTTAGTACTTGGATGGGAGACCGCCTGGGAATACCAGGTGCTGTAAGCT
1363	seq1	4	41352453	41352571	minus	GCTTACGGCCATACCACCCTGGAAATGCCCGATCTCATCTGAACTCGGAAGTAAAGCAGGGTCGGGCCTGGTTAGTACTTGGATGGGAGACCGCCTGGGAATACCAGGTGCTGTAAGCT
1364	seq1	4	41352630	41352748	minus	GCTTACGGCCATACCACCCTGGAAATGCCCGATCTCATCTGAACTCGGAAGTAAAGCAGGGTCGGGCCTGGTTAGTACTTGGATGGGAGACCGCCTGGGAATACCAGGTGCTGTAAGCT
1365	seq1	4	41352807	41352925	minus	GCTTACGGCCATACCACCCTGGAAATGCCCGATCTCATCTGAACTCGGAAGTAAAGCAGGGTCGGGCCTGGTTAGTACTTGGATGGGAGACCGCCTGGGAATACCAGGTGCTGTAAGCT
1366		4	41352984	41353099	minus	TACGGCCATACCACCCTGGAAATGCCCGATCTCATCTGAACTCGGAAGTAAAGCAGGGTCGGGCCTGGTTAGTACTTGGATGGGAGACCGCCTGGGAATACCAGGTGCTGTAAGCT
1367		4	41353161	41353273	minus	AAAAAAAAAAAAATGGAAATGCCCGATCTCATCTGAACTCGGAAGTAAAGCAGGGTCGGGCCTGGTTAGTACTTGGATGGGAGACCGCCTGGGAATACCAGGTGCTGTAAGCT
1368		4	41706961	41707073	plus	AAAAAAAAAAAAAAGGAAATGCCCGATCTCATCTGAACTCGGAAGTAAAGCAGGGTCGGGCCTGGTTAGTACTTGGATGGGAGACCGCCTGGGAATACCAGGTGCTGTAAGCT
1369		4	41707132	41707250	plus	GCTTACGGCCATACCACCCTGGAAATGCCCGATCTCATCTGAACTCGGAAGTAAAGCAGGGTCGGGCCTGGTTAGTACTTGGATGGGAGACCGCCTGGGAATACCAGGTGCTCTAAGCT
1370		4	41707309	41707427	plus	GCTTACGGCCATACCACCCTGGAAATACCCGATCTCATCTGAACTCGGAAGTAAAGCAGGGTCGGGTCTGGTTAGTACTTGGATGGGAGACCGCCTGGGAATACCAGGTGCTGTAAGCT
1371		4	41707487	41707604	plus	CTTACGGCCATACCACCCTGGAAATGCCCGATCTCATCTGAACTCGGAAGTAAAGCAGGGTCGGGCCTGGTTAGTACTTGGATGGGAGACCGCCTGGGAATACCAGGTGCTGTAAGCT
1372	seq1	4	41707663	41707781	plus	GCTTACGGCCATACCACCCTGGAAATGCCCGATCTCATCTGAACTCGGAAGTAAAGCAGGGTCGGGCCTGGTTAGTACTTGGATGGGAGACCGCCTGGGAATACCAGGTGCTGTAAGCT
1373	seq1	4	41707840	41707958	plus	GCTTACGGCCATACCACCCTGGAAATGCCCGATCTCATCTGAACTCGGAAGTAAAGCAGGGTCGGGCCTGGTTAGTACTTGGATGGGAGACCGCCTGGGAATACCAGGTGCTGTAAGCT
1374	seq1	4	41708017	41708135	plus	GCTTACGGCCATACCACCCTGGAAATGCCCGATCTCATCTGAACTCGGAAGTAAAGCAGGGTCGGGCCTGGTTAGTACTTGGATGGGAGACCGCCTGGGAATACCAGGTGCTGTAAGCT
1375	seq1	4	41708194	41708312	plus	GCTTACGGCCATACCACCCTGGAAATGCCCGATCTCATCTGAACTCGGAAGTAAAGCAGGGTCGGGCCTGGTTAGTACTTGGATGGGAGACCGCCTGGGAATACCAGGTGCTGTAAGCT
1376	seq40	4	41708372	41708489	plus	CTTACGGCCATACCACCCTGGAAATGCCCGATCTCATCTGAACTCGGAAGTAAAGCAGGGTCGGGCCTGGTTAGTACTTGGATGGGAGACCGCCTGGGAATACCAGGTGCTGTAGGCT
1377	seq1	4	41708548	41708666	plus	GCTTACGGCCATACCACCCTGGAAATGCCCGATCTCATCTGAACTCGGAAGTAAAGCAGGGTCGGGCCTGGTTAGTACTTGGATGGGAGACCGCCTGGGAATACCAGGTGCTGTAAGCT
1378	seq1	4	41708725	41708843	plus	GCTTACGGCCATACCACCCTGGAAATGCCCGATCTCATCTGAACTCGGAAGTAAAGCAGGGTCGGGCCTGGTTAGTACTTGGATGGGAGACCGCCTGGGAATACCAGGTGCTGTAAGCT
1379		4	41708996	41709114	plus	GCTTACGGCCATACCACCCTGGAAATTCCCGATCTCATCTGAACTCGGAAGTAAAGCAGGGTCGGGGCTGGCAAGTACTTGGATGGGAGACCGCCTGGGAATACCAGGTGCTGTAAGCT
1380	seq1	4	41709173	41709291	plus	GCTTACGGCCATACCACCCTGGAAATGCCCGATCTCATCTGAACTCGGAAGTAAAGCAGGGTCGGGCCTGGTTAGTACTTGGATGGGAGACCGCCTGGGAATACCAGGTGCTGTAAGCT
1381	seq1	4	41709350	41709468	plus	GCTTACGGCCATACCACCCTGGAAATGCCCGATCTCATCTGAACTCGGAAGTAAAGCAGGGTCGGGCCTGGTTAGTACTTGGATGGGAGACCGCCTGGGAATACCAGGTGCTGTAAGCT
1382	seq1	4	41709527	41709645	plus	GCTTACGGCCATACCACCCTGGAAATGCCCGATCTCATCTGAACTCGGAAGTAAAGCAGGGTCGGGCCTGGTTAGTACTTGGATGGGAGACCGCCTGGGAATACCAGGTGCTGTAAGCT
1383	seq1	4	41709704	41709822	plus	GCTTACGGCCATACCACCCTGGAAATGCCCGATCTCATCTGAACTCGGAAGTAAAGCAGGGTCGGGCCTGGTTAGTACTTGGATGGGAGACCGCCTGGGAATACCAGGTGCTGTAAGCT
1384	seq1	4	41709881	41709999	plus	GCTTACGGCCATACCACCCTGGAAATGCCCGATCTCATCTGAACTCGGAAGTAAAGCAGGGTCGGGCCTGGTTAGTACTTGGATGGGAGACCGCCTGGGAATACCAGGTGCTGTAAGCT
1385	seq1	4	41710058	41710176	plus	GCTTACGGCCATACCACCCTGGAAATGCCCGATCTCATCTGAACTCGGAAGTAAAGCAGGGTCGGGCCTGGTTAGTACTTGGATGGGAGACCGCCTGGGAATACCAGGTGCTGTAAGCT
1386	seq1	4	41710299	41710417	plus	GCTTACGGCCATACCACCCTGGAAATGCCCGATCTCATCTGAACTCGGAAGTAAAGCAGGGTCGGGCCTGGTTAGTACTTGGATGGGAGACCGCCTGGGAATACCAGGTGCTGTAAGCT
1387	seq1	4	41710476	41710594	plus	GCTTACGGCCATACCACCCTGGAAATGCCCGATCTCATCTGAACTCGGAAGTAAAGCAGGGTCGGGCCTGGTTAGTACTTGGATGGGAGACCGCCTGGGAATACCAGGTGCTGTAAGCT
1388		4	41710654	41710771	plus	CTTACGGCCATACCACCCTGGAAATGCCCGATCTCATCTGAACTCGGAAGTAAAGCAGGGTCGGGCCTGGTTAGTACTTGGATGGGAGACCGCCTGGGAATACCAGGTGCTGTAAGCT
1389		4	41710830	41710934	plus	GCTTACGGCCATACCACCCTGGAAATGCCCGATCTCATCTGAACTCGGAAGTAAAGCAGGGTCGGGCCTGGTTAGTACTTGGATGGGAAACCGCCTGGGAATACC
1390		4	41711254	41711366	plus	AAAAAAAAAAAAAAGGAAATGCCCGATCTCATCTGAACTCGGAAGTAAAGCAGGGTCGGGCCTGGTTAGTACTTGGATGGGAGACCGCCTGGGAATACCAGGTGCTGTAAGCT
1391		4	41711425	41711543	plus	GCTTACGGCCATACCACCCTGGAAATGCCCGATCTCATCTGAACTCGGAAGTAAAGCAGGGTCGGGCCTGGTTAGTACTTGGATGGGAGACCGCCTGGGAATACCAGGTGCTCTAAGCT
1392	seq19	4	41711602	41711720	plus	GCTTACGGCCATACCACCCTGGAAATACCCGATCTCATCTGAACTCGGAAGTAAAGCAGGGTCGGGCCTGGTTAGTACTTGGATGGGAGACCGCCTGGGAATACCAGGTGCTGTAAGCT
1393	seq1	4	41711779	41711897	plus	GCTTACGGCCATACCACCCTGGAAATGCCCGATCTCATCTGAACTCGGAAGTAAAGCAGGGTCGGGCCTGGTTAGTACTTGGATGGGAGACCGCCTGGGAATACCAGGTGCTGTAAGCT
1394	seq1	4	41711956	41712074	plus	GCTTACGGCCATACCACCCTGGAAATGCCCGATCTCATCTGAACTCGGAAGTAAAGCAGGGTCGGGCCTGGTTAGTACTTGGATGGGAGACCGCCTGGGAATACCAGGTGCTGTAAGCT
1395	seq1	4	41712133	41712251	plus	GCTTACGGCCATACCACCCTGGAAATGCCCGATCTCATCTGAACTCGGAAGTAAAGCAGGGTCGGGCCTGGTTAGTACTTGGATGGGAGACCGCCTGGGAATACCAGGTGCTGTAAGCT
1396		4	41712310	41712428	plus	GCTTACGGCCATACCACCCTGGAAATGCCCGATCTCATCTGAACTTGGAAGTAAAGCAGGGTCGGGTCTGGTTAGTACTTGGATGGGAGACCGCCTAGGAATACCAGGTGCTGTAAGCT
1397	seq1	4	41712632	41712750	plus	GCTTACGGCCATACCACCCTGGAAATGCCCGATCTCATCTGAACTCGGAAGTAAAGCAGGGTCGGGCCTGGTTAGTACTTGGATGGGAGACCGCCTGGGAATACCAGGTGCTGTAAGCT
1398	seq40	4	41712810	41712927	plus	CTTACGGCCATACCACCCTGGAAATGCCCGATCTCATCTGAACTCGGAAGTAAAGCAGGGTCGGGCCTGGTTAGTACTTGGATGGGAGACCGCCTGGGAATACCAGGTGCTGTAGGCT
1399	seq1	4	41712986	41713104	plus	GCTTACGGCCATACCACCCTGGAAATGCCCGATCTCATCTGAACTCGGAAGTAAAGCAGGGTCGGGCCTGGTTAGTACTTGGATGGGAGACCGCCTGGGAATACCAGGTGCTGTAAGCT
1400	seq1	4	41713163	41713281	plus	GCTTACGGCCATACCACCCTGGAAATGCCCGATCTCATCTGAACTCGGAAGTAAAGCAGGGTCGGGCCTGGTTAGTACTTGGATGGGAGACCGCCTGGGAATACCAGGTGCTGTAAGCT
1401	seq1	4	41713340	41713458	plus	GCTTACGGCCATACCACCCTGGAAATGCCCGATCTCATCTGAACTCGGAAGTAAAGCAGGGTCGGGCCTGGTTAGTACTTGGATGGGAGACCGCCTGGGAATACCAGGTGCTGTAAGCT
1402	seq1	4	41713517	41713635	plus	GCTTACGGCCATACCACCCTGGAAATGCCCGATCTCATCTGAACTCGGAAGTAAAGCAGGGTCGGGCCTGGTTAGTACTTGGATGGGAGACCGCCTGGGAATACCAGGTGCTGTAAGCT
1403	seq36	4	41713694	41713812	plus	GCTTACGGCCATACCACCCTGGAAATGCCCGATCTCATCTGAACTCAGAAGTAAAGCAGGGTCGGGCCTGGTTAGTACTTGGATGGGAGACCGCCTGGGAATACCAGGTGCTGTAAGCT
1404	seq1	4	41713871	41713989	plus	GCTTACGGCCATACCACCCTGGAAATGCCCGATCTCATCTGAACTCGGAAGTAAAGCAGGGTCGGGCCTGGTTAGTACTTGGATGGGAGACCGCCTGGGAATACCAGGTGCTGTAAGCT
1405	seq1	4	41714048	41714166	plus	GCTTACGGCCATACCACCCTGGAAATGCCCGATCTCATCTGAACTCGGAAGTAAAGCAGGGTCGGGCCTGGTTAGTACTTGGATGGGAGACCGCCTGGGAATACCAGGTGCTGTAAGCT
1406	seq1	4	41714225	41714343	plus	GCTTACGGCCATACCACCCTGGAAATGCCCGATCTCATCTGAACTCGGAAGTAAAGCAGGGTCGGGCCTGGTTAGTACTTGGATGGGAGACCGCCTGGGAATACCAGGTGCTGTAAGCT
1407	seq1	4	41714402	41714520	plus	GCTTACGGCCATACCACCCTGGAAATGCCCGATCTCATCTGAACTCGGAAGTAAAGCAGGGTCGGGCCTGGTTAGTACTTGGATGGGAGACCGCCTGGGAATACCAGGTGCTGTAAGCT
1408		4	41714579	41714697	plus	GCTTACGGCCATACCACCCTGGAAATGCCCGATCTCATCTGAACTCGGAAGTAAAGCAGGGTCGGGTCTGGTTAGTACTTGGATGGGAGACCGCCTAGGAATACCAGGTGCTGTAAGCT
1409		4	41714757	41714874	plus	CTTACGGCCATACCACCCTGGAAATGCCCGATCTCATCTGAACTCGGAAGTAAAGCAGGGTCGGGCCTGGTTAGTACTTGGATGGGAGACCGCCTGGGAATACCAGGTGCTGTAAGCT
1410	seq1	4	41714933	41715051	plus	GCTTACGGCCATACCACCCTGGAAATGCCCGATCTCATCTGAACTCGGAAGTAAAGCAGGGTCGGGCCTGGTTAGTACTTGGATGGGAGACCGCCTGGGAATACCAGGTGCTGTAAGCT
1411	seq1	4	41715110	41715228	plus	GCTTACGGCCATACCACCCTGGAAATGCCCGATCTCATCTGAACTCGGAAGTAAAGCAGGGTCGGGCCTGGTTAGTACTTGGATGGGAGACCGCCTGGGAATACCAGGTGCTGTAAGCT
1412	seq1	4	41715287	41715405	plus	GCTTACGGCCATACCACCCTGGAAATGCCCGATCTCATCTGAACTCGGAAGTAAAGCAGGGTCGGGCCTGGTTAGTACTTGGATGGGAGACCGCCTGGGAATACCAGGTGCTGTAAGCT
1413		4	41715465	41715582	plus	CTTACGGCCATACCACCCTGGAAATGCCCGATCTCATCTGAACTCGGAAGTAAAGCAGGGTCGGGCCTGGTTAGTACTTGGATGGGAGACCGCCTGGGAATACCAGGTGCTGTAAGCT
1414	seq1	4	41715641	41715759	plus	GCTTACGGCCATACCACCCTGGAAATGCCCGATCTCATCTGAACTCGGAAGTAAAGCAGGGTCGGGCCTGGTTAGTACTTGGATGGGAGACCGCCTGGGAATACCAGGTGCTGTAAGCT
1415	seq1	4	41715818	41715936	plus	GCTTACGGCCATACCACCCTGGAAATGCCCGATCTCATCTGAACTCGGAAGTAAAGCAGGGTCGGGCCTGGTTAGTACTTGGATGGGAGACCGCCTGGGAATACCAGGTGCTGTAAGCT
1416	seq1	4	41716060	41716178	plus	GCTTACGGCCATACCACCCTGGAAATGCCCGATCTCATCTGAACTCGGAAGTAAAGCAGGGTCGGGCCTGGTTAGTACTTGGATGGGAGACCGCCTGGGAATACCAGGTGCTGTAAGCT
1417	seq1	4	41716237	41716355	plus	GCTTACGGCCATACCACCCTGGAAATGCCCGATCTCATCTGAACTCGGAAGTAAAGCAGGGTCGGGCCTGGTTAGTACTTGGATGGGAGACCGCCTGGGAATACCAGGTGCTGTAAGCT
1418	seq36	4	41716414	41716532	plus	GCTTACGGCCATACCACCCTGGAAATGCCCGATCTCATCTGAACTCAGAAGTAAAGCAGGGTCGGGCCTGGTTAGTACTTGGATGGGAGACCGCCTGGGAATACCAGGTGCTGTAAGCT
1419	seq1	4	41716591	41716709	plus	GCTTACGGCCATACCACCCTGGAAATGCCCGATCTCATCTGAACTCGGAAGTAAAGCAGGGTCGGGCCTGGTTAGTACTTGGATGGGAGACCGCCTGGGAATACCAGGTGCTGTAAGCT
1420	seq1	4	41716768	41716886	plus	GCTTACGGCCATACCACCCTGGAAATGCCCGATCTCATCTGAACTCGGAAGTAAAGCAGGGTCGGGCCTGGTTAGTACTTGGATGGGAGACCGCCTGGGAATACCAGGTGCTGTAAGCT
1421	seq1	4	41716945	41717063	plus	GCTTACGGCCATACCACCCTGGAAATGCCCGATCTCATCTGAACTCGGAAGTAAAGCAGGGTCGGGCCTGGTTAGTACTTGGATGGGAGACCGCCTGGGAATACCAGGTGCTGTAAGCT
1422	seq40	4	41717123	41717240	plus	CTTACGGCCATACCACCCTGGAAATGCCCGATCTCATCTGAACTCGGAAGTAAAGCAGGGTCGGGCCTGGTTAGTACTTGGATGGGAGACCGCCTGGGAATACCAGGTGCTGTAGGCT
1423	seq1	4	41717299	41717417	plus	GCTTACGGCCATACCACCCTGGAAATGCCCGATCTCATCTGAACTCGGAAGTAAAGCAGGGTCGGGCCTGGTTAGTACTTGGATGGGAGACCGCCTGGGAATACCAGGTGCTGTAAGCT
1424	seq1	4	41717595	41717713	plus	GCTTACGGCCATACCACCCTGGAAATGCCCGATCTCATCTGAACTCGGAAGTAAAGCAGGGTCGGGCCTGGTTAGTACTTGGATGGGAGACCGCCTGGGAATACCAGGTGCTGTAAGCT
1425	seq1	4	41717772	41717890	plus	GCTTACGGCCATACCACCCTGGAAATGCCCGATCTCATCTGAACTCGGAAGTAAAGCAGGGTCGGGCCTGGTTAGTACTTGGATGGGAGACCGCCTGGGAATACCAGGTGCTGTAAGCT
1426		4	41717950	41718067	plus	CTTACGGCCATACCACCCTGGAAATGCCCGATCTCATCTGAACTCGGAAGTAAAGCAGGGTCGGGCCTGGTTAGTACTTGGATGGGAGACCGCCTGGGAATACCAGGTGCTGTAAGCT
1427		4	41718126	41718244	plus	GCTTACGGCCATACCACCCTGGAAATGCCCGATCTCATCTGAACTCGGAAGTAAAGCAGGGTCGGGCCTGGTTAGTACTTGGATGGGAAACCGCCTGGGAATACCAGGTGCTGTAAGCT
1428	seq1	4	41718303	41718421	plus	GCTTACGGCCATACCACCCTGGAAATGCCCGATCTCATCTGAACTCGGAAGTAAAGCAGGGTCGGGCCTGGTTAGTACTTGGATGGGAGACCGCCTGGGAATACCAGGTGCTGTAAGCT
1429	seq1	4	41718480	41718598	plus	GCTTACGGCCATACCACCCTGGAAATGCCCGATCTCATCTGAACTCGGAAGTAAAGCAGGGTCGGGCCTGGTTAGTACTTGGATGGGAGACCGCCTGGGAATACCAGGTGCTGTAAGCT
1430	seq1	4	41718657	41718775	plus	GCTTACGGCCATACCACCCTGGAAATGCCCGATCTCATCTGAACTCGGAAGTAAAGCAGGGTCGGGCCTGGTTAGTACTTGGATGGGAGACCGCCTGGGAATACCAGGTGCTGTAAGCT
1431	seq40	4	41718835	41718952	plus	CTTACGGCCATACCACCCTGGAAATGCCCGATCTCATCTGAACTCGGAAGTAAAGCAGGGTCGGGCCTGGTTAGTACTTGGATGGGAGACCGCCTGGGAATACCAGGTGCTGTAGGCT
1432	seq1	4	41719011	41719129	plus	GCTTACGGCCATACCACCCTGGAAATGCCCGATCTCATCTGAACTCGGAAGTAAAGCAGGGTCGGGCCTGGTTAGTACTTGGATGGGAGACCGCCTGGGAATACCAGGTGCTGTAAGCT
1433	seq1	4	41719188	41719306	plus	GCTTACGGCCATACCACCCTGGAAATGCCCGATCTCATCTGAACTCGGAAGTAAAGCAGGGTCGGGCCTGGTTAGTACTTGGATGGGAGACCGCCTGGGAATACCAGGTGCTGTAAGCT
1434	seq1	4	41719365	41719483	plus	GCTTACGGCCATACCACCCTGGAAATGCCCGATCTCATCTGAACTCGGAAGTAAAGCAGGGTCGGGCCTGGTTAGTACTTGGATGGGAGACCGCCTGGGAATACCAGGTGCTGTAAGCT
1435	seq1	4	41719542	41719660	plus	GCTTACGGCCATACCACCCTGGAAATGCCCGATCTCATCTGAACTCGGAAGTAAAGCAGGGTCGGGCCTGGTTAGTACTTGGATGGGAGACCGCCTGGGAATACCAGGTGCTGTAAGCT
1436	seq1	4	41719719	41719837	plus	GCTTACGGCCATACCACCCTGGAAATGCCCGATCTCATCTGAACTCGGAAGTAAAGCAGGGTCGGGCCTGGTTAGTACTTGGATGGGAGACCGCCTGGGAATACCAGGTGCTGTAAGCT
1437	seq1	4	41719896	41720014	plus	GCTTACGGCCATACCACCCTGGAAATGCCCGATCTCATCTGAACTCGGAAGTAAAGCAGGGTCGGGCCTGGTTAGTACTTGGATGGGAGACCGCCTGGGAATACCAGGTGCTGTAAGCT
1438	seq41	4	41720073	41720191	plus	GCTTACGGCCATACCACCCTGGAAATGCCCGATCTCATCTGAACTCGGAAGTAAAGCAGGGTCGGGCCTGGTTAGTACTTGGATGGGAGACCGCCTGGGAATACCAGGTGCTGTAGGCT
1439		4	41720250	41720368	plus	GCTTACGGCCATACCACCCTGGAAATGCCCGATCTCATCTGAACTCGGAAGTAAAGCACGGTCGGGCCTGGTTAGTACTTGGATGGGAGACCGCCTGGGAATACCAGGTGCTGTAAGCT
1440	seq36	4	41720427	41720545	plus	GCTTACGGCCATACCACCCTGGAAATGCCCGATCTCATCTGAACTCAGAAGTAAAGCAGGGTCGGGCCTGGTTAGTACTTGGATGGGAGACCGCCTGGGAATACCAGGTGCTGTAAGCT
1441		4	41720675	41720791	plus	TTACGGCCATACCACCCTGGAAATGCCCGATCTCATCTGAACTCGGAAGTAAAGCAGGGTCGGGCCTGGTTAGTACTTGGATGGGAGACCGCCTGGGAATACCAGGTGCTGTAAGCT
1442	seq1	4	41720850	41720968	plus	GCTTACGGCCATACCACCCTGGAAATGCCCGATCTCATCTGAACTCGGAAGTAAAGCAGGGTCGGGCCTGGTTAGTACTTGGATGGGAGACCGCCTGGGAATACCAGGTGCTGTAAGCT
1443	seq1	4	41721027	41721145	plus	GCTTACGGCCATACCACCCTGGAAATGCCCGATCTCATCTGAACTCGGAAGTAAAGCAGGGTCGGGCCTGGTTAGTACTTGGATGGGAGACCGCCTGGGAATACCAGGTGCTGTAAGCT
1444	seq1	4	41721204	41721322	plus	GCTTACGGCCATACCACCCTGGAAATGCCCGATCTCATCTGAACTCGGAAGTAAAGCAGGGTCGGGCCTGGTTAGTACTTGGATGGGAGACCGCCTGGGAATACCAGGTGCTGTAAGCT
1445	seq1	4	41721381	41721499	plus	GCTTACGGCCATACCACCCTGGAAATGCCCGATCTCATCTGAACTCGGAAGTAAAGCAGGGTCGGGCCTGGTTAGTACTTGGATGGGAGACCGCCTGGGAATACCAGGTGCTGTAAGCT
1446	seq1	4	41721558	41721676	plus	GCTTACGGCCATACCACCCTGGAAATGCCCGATCTCATCTGAACTCGGAAGTAAAGCAGGGTCGGGCCTGGTTAGTACTTGGATGGGAGACCGCCTGGGAATACCAGGTGCTGTAAGCT
1447	seq1	4	41721735	41721853	plus	GCTTACGGCCATACCACCCTGGAAATGCCCGATCTCATCTGAACTCGGAAGTAAAGCAGGGTCGGGCCTGGTTAGTACTTGGATGGGAGACCGCCTGGGAATACCAGGTGCTGTAAGCT
1448	seq40	4	41721913	41722030	plus	CTTACGGCCATACCACCCTGGAAATGCCCGATCTCATCTGAACTCGGAAGTAAAGCAGGGTCGGGCCTGGTTAGTACTTGGATGGGAGACCGCCTGGGAATACCAGGTGCTGTAGGCT
1449	seq1	4	41722089	41722207	plus	GCTTACGGCCATACCACCCTGGAAATGCCCGATCTCATCTGAACTCGGAAGTAAAGCAGGGTCGGGCCTGGTTAGTACTTGGATGGGAGACCGCCTGGGAATACCAGGTGCTGTAAGCT
1450	seq1	4	41722266	41722384	plus	GCTTACGGCCATACCACCCTGGAAATGCCCGATCTCATCTGAACTCGGAAGTAAAGCAGGGTCGGGCCTGGTTAGTACTTGGATGGGAGACCGCCTGGGAATACCAGGTGCTGTAAGCT
1451	seq1	4	42207950	42208068	plus	GCTTACGGCCATACCACCCTGGAAATGCCCGATCTCATCTGAACTCGGAAGTAAAGCAGGGTCGGGCCTGGTTAGTACTTGGATGGGAGACCGCCTGGGAATACCAGGTGCTGTAAGCT
1452	seq1	4	42208427	42208545	plus	GCTTACGGCCATACCACCCTGGAAATGCCCGATCTCATCTGAACTCGGAAGTAAAGCAGGGTCGGGCCTGGTTAGTACTTGGATGGGAGACCGCCTGGGAATACCAGGTGCTGTAAGCT
1453	seq1	4	42208604	42208722	plus	GCTTACGGCCATACCACCCTGGAAATGCCCGATCTCATCTGAACTCGGAAGTAAAGCAGGGTCGGGCCTGGTTAGTACTTGGATGGGAGACCGCCTGGGAATACCAGGTGCTGTAAGCT
1454		4	43252297	43252415	plus	GCTTACGGCCATACCACCCTGTAAATGCCCGATCTCATCTGAACTCGGAAGTAAAGCAGGGTCGGGCCTGGTTAGTACTTGGATGGGAGACTGCCTGGGAATACCAGGTGCTGTAAGCT
1455		4	43252474	43252592	plus	GCTTACGGCCATACCACCCTGGAAATGCCCGATCTCATCTGAACTCGGAAGGAAAGCAGGGTCGGGCCTGGTTAGTACTTGGATGGGAGACCGCCTGGGAATACCAGGTGCTGTAAGCT
1456	seq10	4	43252651	43252769	plus	GCTTATGGCCATACCACCCTGGAAATGCCCGATCTCATCTGAACTCGGAAGTAAAGCAGGGTCGGGCCTGGTTAGTACTTGGATGGGAGACCGCCTGGGAATACCAGGTGCTGTAAGCT
1457		4	43252828	43252946	plus	GCTTACGGCCATACCACCCTGGAAATGCCCGATCTCATCTGAACTCGGAAGGAAAGCAGGGTCGGGCCTGGTTAGTACTTGGATGGGAGACCGCCTGGGAATACCAGGTGCTGTAAGCT
1458	seq1	4	43253005	43253123	plus	GCTTACGGCCATACCACCCTGGAAATGCCCGATCTCATCTGAACTCGGAAGTAAAGCAGGGTCGGGCCTGGTTAGTACTTGGATGGGAGACCGCCTGGGAATACCAGGTGCTGTAAGCT
1459		4	43253182	43253300	plus	GCTTACGGCCATTCCACCCTGGAAATGCCCGATCTCATCTGAACTCGGAAGGAAAGCAGGGTCGGGCCTGGTTAGTACTTGGATGGGAGACCGCCTGGGAATACCAGGTGCTGTAAGCT
1460		4	43253359	43253477	plus	GCTTACGGCCATACCACCCTGGAAATGCCCGATCTCATCTGAACTCGGAAGTAAAGCAGGGTCGGGCCTGGTTAGTATTTGGATGGGAGACCGCCTGGGAATACCAGGTGCTGTAAGCT
1461		4	43253536	43253654	plus	GCTTACGGCCATACCACCCTGGAAATGCCCGATCTCCTCTGAACTCGGAAGTAAAGCAGGGTCGGGCCTGGTTAGTACTTGGATGGGAGACCGCCTGGGAATACCAGGTGCTGTAGGCT
1462		4	43258728	43258840	plus	AAAAAAAAAAAAAAGGAAATGCCCGATCTCATCTGAACTCGGAAGTAAAGCAGGGTCGGGCCTGGTTAGTACTTGGATGGGAGACCGCCTGGGAATACCAGGTGCTGTAAGCT
1463	seq1	4	43259019	43259137	plus	GCTTACGGCCATACCACCCTGGAAATGCCCGATCTCATCTGAACTCGGAAGTAAAGCAGGGTCGGGCCTGGTTAGTACTTGGATGGGAGACCGCCTGGGAATACCAGGTGCTGTAAGCT
1464		4	43589230	43589343	minus	AAAAAAAAAAAAAAGAGAAATGCCCGATCTCATCTGAACTCGGAAGTAAAGCAGGGTCGGGCCTGGTTAGTACTTGGATGGGAGACTGCCTGGGAATACCAGGTGCTGTAAGCT
1465		4	43594205	43594323	minus	GCTTACGGCCATACCACCCTGGAAAGGCCCGATCTCATCTGAACTCGGAAGTAAAGCAGGGTCGGGCCTGGTTAGTACTTGGATGGGAGACCGCCTGGGAATACCAGGTGCTGTAAGCT
1466		4	43607211	43607326	plus	GCTTACGGCCATACCACCCTGGAAATGCCCGATCTCATCTGAACTCGGAAGTAAAGCAGGGTCGGGCCTGGTTAGTACTTGGATGGGAGACCGCCTGGGAATACCAGGTGCTGTAA
1467	seq1	4	43607388	43607506	plus	GCTTACGGCCATACCACCCTGGAAATGCCCGATCTCATCTGAACTCGGAAGTAAAGCAGGGTCGGGCCTGGTTAGTACTTGGATGGGAGACCGCCTGGGAATACCAGGTGCTGTAAGCT
1468	seq1	4	43607565	43607683	plus	GCTTACGGCCATACCACCCTGGAAATGCCCGATCTCATCTGAACTCGGAAGTAAAGCAGGGTCGGGCCTGGTTAGTACTTGGATGGGAGACCGCCTGGGAATACCAGGTGCTGTAAGCT
1469	seq1	4	43607742	43607860	plus	GCTTACGGCCATACCACCCTGGAAATGCCCGATCTCATCTGAACTCGGAAGTAAAGCAGGGTCGGGCCTGGTTAGTACTTGGATGGGAGACCGCCTGGGAATACCAGGTGCTGTAAGCT
1470	seq1	4	43607919	43608037	plus	GCTTACGGCCATACCACCCTGGAAATGCCCGATCTCATCTGAACTCGGAAGTAAAGCAGGGTCGGGCCTGGTTAGTACTTGGATGGGAGACCGCCTGGGAATACCAGGTGCTGTAAGCT
1471	seq1	4	43608096	43608214	plus	GCTTACGGCCATACCACCCTGGAAATGCCCGATCTCATCTGAACTCGGAAGTAAAGCAGGGTCGGGCCTGGTTAGTACTTGGATGGGAGACCGCCTGGGAATACCAGGTGCTGTAAGCT
1472	seq1	4	43608273	43608391	plus	GCTTACGGCCATACCACCCTGGAAATGCCCGATCTCATCTGAACTCGGAAGTAAAGCAGGGTCGGGCCTGGTTAGTACTTGGATGGGAGACCGCCTGGGAATACCAGGTGCTGTAAGCT
1473	seq1	4	43608450	43608568	plus	GCTTACGGCCATACCACCCTGGAAATGCCCGATCTCATCTGAACTCGGAAGTAAAGCAGGGTCGGGCCTGGTTAGTACTTGGATGGGAGACCGCCTGGGAATACCAGGTGCTGTAAGCT
1474	seq1	4	43608627	43608745	plus	GCTTACGGCCATACCACCCTGGAAATGCCCGATCTCATCTGAACTCGGAAGTAAAGCAGGGTCGGGCCTGGTTAGTACTTGGATGGGAGACCGCCTGGGAATACCAGGTGCTGTAAGCT
1475	seq1	4	43608804	43608922	plus	GCTTACGGCCATACCACCCTGGAAATGCCCGATCTCATCTGAACTCGGAAGTAAAGCAGGGTCGGGCCTGGTTAGTACTTGGATGGGAGACCGCCTGGGAATACCAGGTGCTGTAAGCT
1476	seq1	4	43608981	43609099	plus	GCTTACGGCCATACCACCCTGGAAATGCCCGATCTCATCTGAACTCGGAAGTAAAGCAGGGTCGGGCCTGGTTAGTACTTGGATGGGAGACCGCCTGGGAATACCAGGTGCTGTAAGCT
1477	seq43	4	43609158	43609276	plus	GCTTACGGCCATACCACCCTGGAAATGCCCGATCTCATCTGAACTCGGAAGTAAAACAGGGTCGGGCCTGGTTAGTACTTGGATGGGAGACCGCCTGGGAATACCAGGTGCTGTAAGCT
1478	seq1	4	43609335	43609453	plus	GCTTACGGCCATACCACCCTGGAAATGCCCGATCTCATCTGAACTCGGAAGTAAAGCAGGGTCGGGCCTGGTTAGTACTTGGATGGGAGACCGCCTGGGAATACCAGGTGCTGTAAGCT
1479	seq1	4	43609512	43609630	plus	GCTTACGGCCATACCACCCTGGAAATGCCCGATCTCATCTGAACTCGGAAGTAAAGCAGGGTCGGGCCTGGTTAGTACTTGGATGGGAGACCGCCTGGGAATACCAGGTGCTGTAAGCT
1480	seq1	4	43609689	43609807	plus	GCTTACGGCCATACCACCCTGGAAATGCCCGATCTCATCTGAACTCGGAAGTAAAGCAGGGTCGGGCCTGGTTAGTACTTGGATGGGAGACCGCCTGGGAATACCAGGTGCTGTAAGCT
1481	seq1	4	43609866	43609984	plus	GCTTACGGCCATACCACCCTGGAAATGCCCGATCTCATCTGAACTCGGAAGTAAAGCAGGGTCGGGCCTGGTTAGTACTTGGATGGGAGACCGCCTGGGAATACCAGGTGCTGTAAGCT
1482	seq1	4	43610043	43610161	plus	GCTTACGGCCATACCACCCTGGAAATGCCCGATCTCATCTGAACTCGGAAGTAAAGCAGGGTCGGGCCTGGTTAGTACTTGGATGGGAGACCGCCTGGGAATACCAGGTGCTGTAAGCT
1483	seq1	4	43610220	43610338	plus	GCTTACGGCCATACCACCCTGGAAATGCCCGATCTCATCTGAACTCGGAAGTAAAGCAGGGTCGGGCCTGGTTAGTACTTGGATGGGAGACCGCCTGGGAATACCAGGTGCTGTAAGCT
1484	seq1	4	43610397	43610515	plus	GCTTACGGCCATACCACCCTGGAAATGCCCGATCTCATCTGAACTCGGAAGTAAAGCAGGGTCGGGCCTGGTTAGTACTTGGATGGGAGACCGCCTGGGAATACCAGGTGCTGTAAGCT
1485	seq1	4	43610574	43610692	plus	GCTTACGGCCATACCACCCTGGAAATGCCCGATCTCATCTGAACTCGGAAGTAAAGCAGGGTCGGGCCTGGTTAGTACTTGGATGGGAGACCGCCTGGGAATACCAGGTGCTGTAAGCT
1486	seq1	4	43610751	43610869	plus	GCTTACGGCCATACCACCCTGGAAATGCCCGATCTCATCTGAACTCGGAAGTAAAGCAGGGTCGGGCCTGGTTAGTACTTGGATGGGAGACCGCCTGGGAATACCAGGTGCTGTAAGCT
1487	seq43	4	43610928	43611046	plus	GCTTACGGCCATACCACCCTGGAAATGCCCGATCTCATCTGAACTCGGAAGTAAAACAGGGTCGGGCCTGGTTAGTACTTGGATGGGAGACCGCCTGGGAATACCAGGTGCTGTAAGCT
1488	seq1	4	43611105	43611223	plus	GCTTACGGCCATACCACCCTGGAAATGCCCGATCTCATCTGAACTCGGAAGTAAAGCAGGGTCGGGCCTGGTTAGTACTTGGATGGGAGACCGCCTGGGAATACCAGGTGCTGTAAGCT
1489	seq43	4	43611282	43611400	plus	GCTTACGGCCATACCACCCTGGAAATGCCCGATCTCATCTGAACTCGGAAGTAAAACAGGGTCGGGCCTGGTTAGTACTTGGATGGGAGACCGCCTGGGAATACCAGGTGCTGTAAGCT
1490	seq1	4	43611459	43611577	plus	GCTTACGGCCATACCACCCTGGAAATGCCCGATCTCATCTGAACTCGGAAGTAAAGCAGGGTCGGGCCTGGTTAGTACTTGGATGGGAGACCGCCTGGGAATACCAGGTGCTGTAAGCT
1491	seq1	4	43611636	43611754	plus	GCTTACGGCCATACCACCCTGGAAATGCCCGATCTCATCTGAACTCGGAAGTAAAGCAGGGTCGGGCCTGGTTAGTACTTGGATGGGAGACCGCCTGGGAATACCAGGTGCTGTAAGCT
1492	seq1	4	43611813	43611931	plus	GCTTACGGCCATACCACCCTGGAAATGCCCGATCTCATCTGAACTCGGAAGTAAAGCAGGGTCGGGCCTGGTTAGTACTTGGATGGGAGACCGCCTGGGAATACCAGGTGCTGTAAGCT
1493	seq1	4	43611990	43612108	plus	GCTTACGGCCATACCACCCTGGAAATGCCCGATCTCATCTGAACTCGGAAGTAAAGCAGGGTCGGGCCTGGTTAGTACTTGGATGGGAGACCGCCTGGGAATACCAGGTGCTGTAAGCT
1494	seq1	4	43612167	43612285	plus	GCTTACGGCCATACCACCCTGGAAATGCCCGATCTCATCTGAACTCGGAAGTAAAGCAGGGTCGGGCCTGGTTAGTACTTGGATGGGAGACCGCCTGGGAATACCAGGTGCTGTAAGCT
1495	seq1	4	43612344	43612462	plus	GCTTACGGCCATACCACCCTGGAAATGCCCGATCTCATCTGAACTCGGAAGTAAAGCAGGGTCGGGCCTGGTTAGTACTTGGATGGGAGACCGCCTGGGAATACCAGGTGCTGTAAGCT
1496		4	43736044	43736158	plus	AACAGCCATATCACCCTGCAGCCCAAGACTGGTTACTTCATAAAGCTAAGCAAGGGTGCGCCTGGCCAGTACCTGGCTGGGAGACCACATGGGAAAACTAGGATGCTGTTGGAAG
1497	seq1	4	43773588	43773706	minus	GCTTACGGCCATACCACCCTGGAAATGCCCGATCTCATCTGAACTCGGAAGTAAAGCAGGGTCGGGCCTGGTTAGTACTTGGATGGGAGACCGCCTGGGAATACCAGGTGCTGTAAGCT
1498	seq1	4	43773765	43773883	minus	GCTTACGGCCATACCACCCTGGAAATGCCCGATCTCATCTGAACTCGGAAGTAAAGCAGGGTCGGGCCTGGTTAGTACTTGGATGGGAGACCGCCTGGGAATACCAGGTGCTGTAAGCT
1499	seq1	4	43773942	43774060	minus	GCTTACGGCCATACCACCCTGGAAATGCCCGATCTCATCTGAACTCGGAAGTAAAGCAGGGTCGGGCCTGGTTAGTACTTGGATGGGAGACCGCCTGGGAATACCAGGTGCTGTAAGCT
1500	seq1	4	43774119	43774237	minus	GCTTACGGCCATACCACCCTGGAAATGCCCGATCTCATCTGAACTCGGAAGTAAAGCAGGGTCGGGCCTGGTTAGTACTTGGATGGGAGACCGCCTGGGAATACCAGGTGCTGTAAGCT
1501	seq1	4	43774296	43774414	minus	GCTTACGGCCATACCACCCTGGAAATGCCCGATCTCATCTGAACTCGGAAGTAAAGCAGGGTCGGGCCTGGTTAGTACTTGGATGGGAGACCGCCTGGGAATACCAGGTGCTGTAAGCT
1502	seq1	4	43774473	43774591	minus	GCTTACGGCCATACCACCCTGGAAATGCCCGATCTCATCTGAACTCGGAAGTAAAGCAGGGTCGGGCCTGGTTAGTACTTGGATGGGAGACCGCCTGGGAATACCAGGTGCTGTAAGCT
1503	seq1	4	43774650	43774768	minus	GCTTACGGCCATACCACCCTGGAAATGCCCGATCTCATCTGAACTCGGAAGTAAAGCAGGGTCGGGCCTGGTTAGTACTTGGATGGGAGACCGCCTGGGAATACCAGGTGCTGTAAGCT
1504	seq1	4	43774827	43774945	minus	GCTTACGGCCATACCACCCTGGAAATGCCCGATCTCATCTGAACTCGGAAGTAAAGCAGGGTCGGGCCTGGTTAGTACTTGGATGGGAGACCGCCTGGGAATACCAGGTGCTGTAAGCT
1505	seq1	4	43775004	43775122	minus	GCTTACGGCCATACCACCCTGGAAATGCCCGATCTCATCTGAACTCGGAAGTAAAGCAGGGTCGGGCCTGGTTAGTACTTGGATGGGAGACCGCCTGGGAATACCAGGTGCTGTAAGCT
1506	seq1	4	43775181	43775299	minus	GCTTACGGCCATACCACCCTGGAAATGCCCGATCTCATCTGAACTCGGAAGTAAAGCAGGGTCGGGCCTGGTTAGTACTTGGATGGGAGACCGCCTGGGAATACCAGGTGCTGTAAGCT
1507	seq1	4	43775358	43775476	minus	GCTTACGGCCATACCACCCTGGAAATGCCCGATCTCATCTGAACTCGGAAGTAAAGCAGGGTCGGGCCTGGTTAGTACTTGGATGGGAGACCGCCTGGGAATACCAGGTGCTGTAAGCT
1508	seq44	4	43775535	43775653	minus	GCTTACGGCCATACCACCCTGGAAATGCCCGATCTCATCTGAACTCGGAAGTAAAGCAGGGTCGGGCCTGGTTAGTACTTGCATGGGAGACCGCCTGGGAATACCAGGTGCTGTAAGCT
1509		4	43775712	43775830	minus	GCTTACGGCCATACCACCCTGGAAATGCCCGATCTCATCTGAACTCGGAAGTAAAGCAGGGTCGGGCCTGGTTAGTACTTGGATGGGAGACCGCCTGGGAATACCAGGTGCGGTAAGCT
1510	seq1	4	43775889	43776007	minus	GCTTACGGCCATACCACCCTGGAAATGCCCGATCTCATCTGAACTCGGAAGTAAAGCAGGGTCGGGCCTGGTTAGTACTTGGATGGGAGACCGCCTGGGAATACCAGGTGCTGTAAGCT
1511	seq1	4	43776066	43776184	minus	GCTTACGGCCATACCACCCTGGAAATGCCCGATCTCATCTGAACTCGGAAGTAAAGCAGGGTCGGGCCTGGTTAGTACTTGGATGGGAGACCGCCTGGGAATACCAGGTGCTGTAAGCT
1512	seq1	4	43776243	43776361	minus	GCTTACGGCCATACCACCCTGGAAATGCCCGATCTCATCTGAACTCGGAAGTAAAGCAGGGTCGGGCCTGGTTAGTACTTGGATGGGAGACCGCCTGGGAATACCAGGTGCTGTAAGCT
1513	seq1	4	43776420	43776538	minus	GCTTACGGCCATACCACCCTGGAAATGCCCGATCTCATCTGAACTCGGAAGTAAAGCAGGGTCGGGCCTGGTTAGTACTTGGATGGGAGACCGCCTGGGAATACCAGGTGCTGTAAGCT
1514	seq1	4	43776597	43776715	minus	GCTTACGGCCATACCACCCTGGAAATGCCCGATCTCATCTGAACTCGGAAGTAAAGCAGGGTCGGGCCTGGTTAGTACTTGGATGGGAGACCGCCTGGGAATACCAGGTGCTGTAAGCT
1515		4	43776774	43776892	minus	GCTTACGGCCATACCACCCTGGAAATGCCCGATCTCATCTGAACTCGGAAGTAAAGCAGGGTCGGGCCTGGTTAGTACTTGGATGGGAGACCGCCTGGGAATACCAGGTGCGGTAAGCT
1516		4	43776951	43777069	minus	GCTTACGGCCATACCACCCTGGAAATGCCCGATCTCATCTGAACTCGGAAGTAAAGCAGGGTCGGGCCTGGTTAGCACTTGGATGGGAGACCGCCTGGGAATACCAGGTGCTGTAAGCT
1517	seq1	4	43777128	43777246	minus	GCTTACGGCCATACCACCCTGGAAATGCCCGATCTCATCTGAACTCGGAAGTAAAGCAGGGTCGGGCCTGGTTAGTACTTGGATGGGAGACCGCCTGGGAATACCAGGTGCTGTAAGCT
1518	seq1	4	43777305	43777423	minus	GCTTACGGCCATACCACCCTGGAAATGCCCGATCTCATCTGAACTCGGAAGTAAAGCAGGGTCGGGCCTGGTTAGTACTTGGATGGGAGACCGCCTGGGAATACCAGGTGCTGTAAGCT
1519		4	43777482	43777600	minus	GCTTACGGCCATACCACCCTGGAAATGCCCGATCTCATCTGAACTCGGAAGTAAAGCAGGGTCGGGCCTGGTTAGCACTTGGATGGGAGACCGCCTGGGAATACCAGGTGCTGTAAGCT
1520	seq1	4	43777659	43777777	minus	GCTTACGGCCATACCACCCTGGAAATGCCCGATCTCATCTGAACTCGGAAGTAAAGCAGGGTCGGGCCTGGTTAGTACTTGGATGGGAGACCGCCTGGGAATACCAGGTGCTGTAAGCT
1521	seq1	4	43777836	43777954	minus	GCTTACGGCCATACCACCCTGGAAATGCCCGATCTCATCTGAACTCGGAAGTAAAGCAGGGTCGGGCCTGGTTAGTACTTGGATGGGAGACCGCCTGGGAATACCAGGTGCTGTAAGCT
1522	seq1	4	43778013	43778131	minus	GCTTACGGCCATACCACCCTGGAAATGCCCGATCTCATCTGAACTCGGAAGTAAAGCAGGGTCGGGCCTGGTTAGTACTTGGATGGGAGACCGCCTGGGAATACCAGGTGCTGTAAGCT
1523	seq1	4	43778190	43778308	minus	GCTTACGGCCATACCACCCTGGAAATGCCCGATCTCATCTGAACTCGGAAGTAAAGCAGGGTCGGGCCTGGTTAGTACTTGGATGGGAGACCGCCTGGGAATACCAGGTGCTGTAAGCT
1524	seq1	4	43778367	43778485	minus	GCTTACGGCCATACCACCCTGGAAATGCCCGATCTCATCTGAACTCGGAAGTAAAGCAGGGTCGGGCCTGGTTAGTACTTGGATGGGAGACCGCCTGGGAATACCAGGTGCTGTAAGCT
1525		4	43778544	43778662	minus	GCTTACGGCCATACCACCCTGGAAATGCCCGATCTCATCTGAACTCGGAAGTAAAGCAGGGTCGGGCCTGGTTAGCACTTGGATGGGAGACCGCCTGGGAATACCAGGTGCTGTAAGCT
1526		4	43830615	43830730	minus	AGCCAGCAGCTAGCTCTCTGCAACTCTCCCATGGCTGCCCACAGAAGCTAAGCAGGGCTGCGCCCGGTCAGTACCTGGATGGGAGACCACATGGGAAAGCTAGATTGCTGCCGGAA
1527	seq1	4	44439261	44439379	minus	GCTTACGGCCATACCACCCTGGAAATGCCCGATCTCATCTGAACTCGGAAGTAAAGCAGGGTCGGGCCTGGTTAGTACTTGGATGGGAGACCGCCTGGGAATACCAGGTGCTGTAAGCT
1528	seq1	4	45132688	45132806	plus	GCTTACGGCCATACCACCCTGGAAATGCCCGATCTCATCTGAACTCGGAAGTAAAGCAGGGTCGGGCCTGGTTAGTACTTGGATGGGAGACCGCCTGGGAATACCAGGTGCTGTAAGCT
1529	seq7	4	45132986	45133104	plus	GCTTACGGCCATACCACCCTGGAAATGCCCAATCTCATCTGAACTCGGAAGTAAAGCAGGGTCGGGCCTGGTTAGTACTTGGATGGGAGACCGCCTGGGAATACCAGGTGCTGTAAGCT
1530	seq1	4	45133284	45133402	plus	GCTTACGGCCATACCACCCTGGAAATGCCCGATCTCATCTGAACTCGGAAGTAAAGCAGGGTCGGGCCTGGTTAGTACTTGGATGGGAGACCGCCTGGGAATACCAGGTGCTGTAAGCT
1531	seq45	4	45139320	45139438	plus	GCTTACGGCCATACCACCCTGGAAATGCCCGATCTCATCTGAACTCGGAAGTAAAGCAGGGTCGGGCCTGGTTAGTACTTGGATGGGAGACCACCTGGGAATACCAGGTGCTGTAAGCT
1532		4	45139497	45139614	plus	GCTTACGGCCATACCACCCTGGAAATGCCCGATCTCATCTGAACTCGGAAGTAAAGCAGGGTCGGGCCTGGTTAGTACTTAATGGGAGACCGCCTGGGAATACCAGGTGCTGTAAGCT
1533		4	45139673	45139791	plus	GCTTATGGCCATACCACCCTGGAAATGCCCGATCTCATCTGAACTCGGAAGTAAAGCAGGGTCGGGCCTGGTTAGTACTTGGATGGGAGACCGCCTGGGAATAACAGGTGCTGTAAGCT
1534	seq1	4	45139850	45139968	plus	GCTTACGGCCATACCACCCTGGAAATGCCCGATCTCATCTGAACTCGGAAGTAAAGCAGGGTCGGGCCTGGTTAGTACTTGGATGGGAGACCGCCTGGGAATACCAGGTGCTGTAAGCT
1535		4	45140027	45140145	plus	GCTTATGGCCATACCACCCTGGAAATGCCCGATCTCATCTGAACTCGGAAGTAAAGCAGGGTCGGGCCTGGTTAGTACTTGGATGGGAGACCGCCTGGGAATAACAGGTGCTGTAAGCT
1536	seq1	4	45140204	45140322	plus	GCTTACGGCCATACCACCCTGGAAATGCCCGATCTCATCTGAACTCGGAAGTAAAGCAGGGTCGGGCCTGGTTAGTACTTGGATGGGAGACCGCCTGGGAATACCAGGTGCTGTAAGCT
1537	seq1	4	45140381	45140499	plus	GCTTACGGCCATACCACCCTGGAAATGCCCGATCTCATCTGAACTCGGAAGTAAAGCAGGGTCGGGCCTGGTTAGTACTTGGATGGGAGACCGCCTGGGAATACCAGGTGCTGTAAGCT
1538	seq1	4	45140558	45140676	plus	GCTTACGGCCATACCACCCTGGAAATGCCCGATCTCATCTGAACTCGGAAGTAAAGCAGGGTCGGGCCTGGTTAGTACTTGGATGGGAGACCGCCTGGGAATACCAGGTGCTGTAAGCT
1539		4	45140735	45140853	plus	GCTTACGGCCATACCACCCTGGAAATGCCCGATCTCATCTGAACTCGGAAGTAAAGCAGGGTCGGGCCTGGTTAGTACTTGGATGGGAGTCCGCCTGGGAATACCAGGTGCTGTAAGCT
1540	seq1	4	45140912	45141030	plus	GCTTACGGCCATACCACCCTGGAAATGCCCGATCTCATCTGAACTCGGAAGTAAAGCAGGGTCGGGCCTGGTTAGTACTTGGATGGGAGACCGCCTGGGAATACCAGGTGCTGTAAGCT
1541	seq46	4	45141089	45141207	plus	GCTTACGGCCATACCACCCTGGAAATGCCCGATCTCATCTGAACTCGGAAGTAAAGCAGGGTCTGGCCTGGTTAGTACTTGGATGGGAGACCGCCTGGGAATACCAGGTGCTGTAAGCT
1542	seq1	4	45141266	45141384	plus	GCTTACGGCCATACCACCCTGGAAATGCCCGATCTCATCTGAACTCGGAAGTAAAGCAGGGTCGGGCCTGGTTAGTACTTGGATGGGAGACCGCCTGGGAATACCAGGTGCTGTAAGCT
1543	seq1	4	45141443	45141561	plus	GCTTACGGCCATACCACCCTGGAAATGCCCGATCTCATCTGAACTCGGAAGTAAAGCAGGGTCGGGCCTGGTTAGTACTTGGATGGGAGACCGCCTGGGAATACCAGGTGCTGTAAGCT
1544		4	45141620	45141738	plus	GCTTACGACCATACCACCCTGGAAATGCCCGATCTCATCTGAACTCTGAAGTAAAGCAGGGTCGGGCCTGGTTAGTACTTGGATGGGAGACCGCCTGGGAATACCAGGTGCTGTAAGCT
1545	seq47	4	45141797	45141915	plus	GCTTACGGCCATACCACCCTGGAAATGCCCGATCTCATCTGAACTCGGAAGTAAAGCGGGGTCGGGCCTGGTTAGTACTTGGATGGGAGACCGCCTGGGAATACCAGGTGCTGTAAGCT
1546	seq13	4	45141974	45142092	plus	GCTTACGGCCATACCACCCTGGAAATGCCTGATCTCATCTGAACTCGGAAGTAAAGCAGGGTCGGGCCTGGTTAGTACTTGGATGGGAGACCGCCTGGGAATACCAGGTGCTGTAAGCT
1547	seq26	4	45142151	45142269	plus	GCTTACAGCCATACCACCCTGGAAATGCCCGATCTCATCTGAACTCGGAAGTAAAGCAGGGTCGGGCCTGGTTAGTACTTGGATGGGAGACCGCCTGGGAATACCAGGTGCTGTAAGCT
1548		4	45303468	45303583	plus	ATAACAGCCATATCACCCTACAGCCCAAGACTGGTAACTCCATAAAGCTAAGCAAGGCTGAGCCTAGCCAGTACCTGGCTGGGAGACCACATGGGAAAACTAGGTTGCTGTTGGAA
1549		4	45994488	45994601	plus	GGCAGCTAGCTCTCTACAACTCTCACATGGCCGCCCACTGAAGCTAAACAGGGCTGTTCCCGGTCAGTACCTGAATGGGAGACCACATGGGAAAGATAGGTTGCTGCCGGAAGT
1550		4	46266188	46266305	plus	AGCCGGCAGCTAGCTCTCTACAACTCTCACATGGCTGCCCACTGAAGCTAAACAGGGCTGTGCCCGGTCAGTACCTGAATGGGAGACCACATGGGAAAGCTAGGTTGCTGCTGGAAGT
1551		4	46324441	46324554	plus	ACAGCAATATCACCCTGCAGCCCAAGACCGGTTACTCCCTGAAGCTAAGCAGGGCTGAGCCTGGCCAGTACCTGGCTGGGAGACCACATGGGAAAACGAGGTTGCTGTTGGAAG
1552		4	46363519	46363625	minus	CAGCCGGCAGCTAGCTCTCTGCAACTCTCACATGGCTGCCCACTGAAGCACTGCGCCTGGTCAGTACCTGGATGGGAGACCACATGGGAAAGCTAGGTTGCTGCTAA
1553		4	46744085	46744197	minus	AAAAAAAAAAAAAAGGAAATGCCCGATCTCATCTGAACTCGGAAGTAAAGCAGGGTCGGGCCTGGTTAGTACTTGGATGGGAGACCGCCTGGGAATACCAGGTGCTGTAAGCT
1554		4	46749826	46749944	minus	GCTTACGGCCATACCACCCTGGAAATTCCCGATCTCATCTGAATTCGGAAGTAAAGCAGGGTCGGGCCTGGTTAGTACTTGGATGGGAGACCGCCTGGGAATACCAGGTGCTGTAAGCT
1555		4	47345749	47345853	minus	CACCCTGGAAATGCCCGATCTCATCTGAACTCGGAAGTAAAGCGGGGTCGGGCCTGGTTAGTACTTGGATGGGAGACCGCCTGGGAATACCAGGTGCTGTAAGCT
1556		4	47520003	47520115	minus	AAAAAAAAAAAAAAGGAAATGCCCGATCTCATCTGAACTCGGAAGTAAAGCAGGGTCGGGCCTGGTTAGTACTTGGATGGGAGAACGCCTGGGAATACCAGGTGCTGTAAGCT
1557		4	47525715	47525833	minus	GCTTACGGCCATACCACCCTGGAAATGCCCGATCTCATCTGAACTCGGAAGTAAAGCAGGGTCGGGCCCGGTTAGTACTTGGATGGGAGACCGCCTGGGAATACCAGGTGCTGTAAGCT
1558		4	47525892	47526010	minus	GCTTACGGCCATACCACCCTGGAAATGCCCAATCTCATCTGAACTCGGAAGTAAAGCAGGGTCGAGCCTGGTTAGTACTTGGATGGGAGACCGCCTGGGAATACCAGGTGCTGTAAGCT
1559	seq1	4	47526069	47526187	minus	GCTTACGGCCATACCACCCTGGAAATGCCCGATCTCATCTGAACTCGGAAGTAAAGCAGGGTCGGGCCTGGTTAGTACTTGGATGGGAGACCGCCTGGGAATACCAGGTGCTGTAAGCT
1560		4	47526246	47526364	minus	GCTTACGGCCATACCACCCTGGAAATGCCCGATCTCATCTGAACTCGGAAGTAAAGCAGGGTCGGGCCCGGTTAGTACTTGGATGGGAGACCGCCTGGGAATACCAGGTGCTGTAAGCT
1561		4	47526423	47526541	minus	GCTTACGGCCATACCACCCTGGAGATGCCCGATCTCATCTGAACTCGGAAGTAAAGCAGGGTCGGGCCTGGTTAGTACTTGGATGGGAGACCGCCTGGGAATACCAGGTGCTGTAAGCT
1562		4	47526600	47526718	minus	GCTTACGGCCATACCACCCTGGAAATGCCCGATCTCATCTGAACTCGGAAGTAAAGCAGGGTCGGGCCCGGTTAGTACTTGGATGGGAGACCGCCTGGGAATACCAGGTGCTGTAAGCT
1563	seq1	4	47526777	47526895	minus	GCTTACGGCCATACCACCCTGGAAATGCCCGATCTCATCTGAACTCGGAAGTAAAGCAGGGTCGGGCCTGGTTAGTACTTGGATGGGAGACCGCCTGGGAATACCAGGTGCTGTAAGCT
1564		4	47526954	47527072	minus	GCTTACGGCCATACCACCCTGGAAATGCCCGATCTCATCTGAACTCGGAAGTAAAGCAGGGTCGGGCCCGGTTAGTACTTGGATGGGAGACCGCCTGGGAATACCAGGTGCTGTAAGCT
1565		4	47527131	47527249	minus	GCTTACGGCCATACCACCCTGGAAATGCCCGATCTCATCTGAACTCGGAAGTAAAGCAGGGTCGGGCCCGGTTAGTACTTGGATGGGAGACCGCCTGGGAATACCAGGTGCTGTAAGCT
1566		4	47527308	47527426	minus	GCTTACGGCCATACCACCCTGGAAATGCCCGATCTCATCTGAACTCGGAAGTAAAGCAGGGTCGGGCCCGGTTAGTACTTGGATGGGAGACCGCCTGGGAATACCAGGTGCTGTAAGCT
1567	seq1	4	47527485	47527603	minus	GCTTACGGCCATACCACCCTGGAAATGCCCGATCTCATCTGAACTCGGAAGTAAAGCAGGGTCGGGCCTGGTTAGTACTTGGATGGGAGACCGCCTGGGAATACCAGGTGCTGTAAGCT
1568	seq1	4	47527662	47527780	minus	GCTTACGGCCATACCACCCTGGAAATGCCCGATCTCATCTGAACTCGGAAGTAAAGCAGGGTCGGGCCTGGTTAGTACTTGGATGGGAGACCGCCTGGGAATACCAGGTGCTGTAAGCT
1569		4	47527839	47527957	minus	GCTTGCGGCCATACCACCCTGGAAATGCCCGATCTCATCTGAACTCGGAAGTAAAGCAGCGTCGGGCCTGGTTAGTACTTGGATGGGAGACCGCCTGGGAATACCAGGTGCTGTAAGCT
1570	seq1	4	47528016	47528134	minus	GCTTACGGCCATACCACCCTGGAAATGCCCGATCTCATCTGAACTCGGAAGTAAAGCAGGGTCGGGCCTGGTTAGTACTTGGATGGGAGACCGCCTGGGAATACCAGGTGCTGTAAGCT
1571		4	47528193	47528311	minus	GCTTACGGCCATACCACCCTGGAAATGCCCGATCTCATCTGAACTCGGAAGTTAAGCAGGGTCGGGCCTGGTTAGTACTTGGATGGGAGACCGCCTGGGAATACCAGGTGCTGTAAGCT
1572	seq27	4	47528370	47528488	minus	GCTTACGGCCATACCACCCTGGAAATGCCCGATCTCATCTGAACTCGGAAGTAAAGCAGGGTTGGGCCTGGTTAGTACTTGGATGGGAGACCGCCTGGGAATACCAGGTGCTGTAAGCT
1573	seq1	4	47528547	47528665	minus	GCTTACGGCCATACCACCCTGGAAATGCCCGATCTCATCTGAACTCGGAAGTAAAGCAGGGTCGGGCCTGGTTAGTACTTGGATGGGAGACCGCCTGGGAATACCAGGTGCTGTAAGCT
1574	seq1	4	47528724	47528842	minus	GCTTACGGCCATACCACCCTGGAAATGCCCGATCTCATCTGAACTCGGAAGTAAAGCAGGGTCGGGCCTGGTTAGTACTTGGATGGGAGACCGCCTGGGAATACCAGGTGCTGTAAGCT
1575	seq1	4	47528901	47529019	minus	GCTTACGGCCATACCACCCTGGAAATGCCCGATCTCATCTGAACTCGGAAGTAAAGCAGGGTCGGGCCTGGTTAGTACTTGGATGGGAGACCGCCTGGGAATACCAGGTGCTGTAAGCT
1576		4	47529078	47529196	minus	GCTTACGGCCATACCACCCTGGAAATGCCCGATCTCATCTAAACTCGGAAGTAAAGCAGGGTCGGGCCTGGTTAGTACTTGGATGGGAGACCGCCTGGGAATACCAGGTGCTGTAAGCT
1577	seq1	4	47529255	47529373	minus	GCTTACGGCCATACCACCCTGGAAATGCCCGATCTCATCTGAACTCGGAAGTAAAGCAGGGTCGGGCCTGGTTAGTACTTGGATGGGAGACCGCCTGGGAATACCAGGTGCTGTAAGCT
1578		4	47529432	47529550	minus	GCTTACGGCCATACCACCCTGGAAATGCCCGATCTCATCTGAACTCGGAAGTAAAGCAGGGTCGGGCCCGGTTAGTACTTGGATGGGAGACCGCCTGGGAATACCAGGTGCTGTAAGCT
1579		4	47529609	47529727	minus	GCTTACGGCCATACCACCCTGGAAATGCCCGATCTCATCTGAACTCGGAAGTAAAGCAGGGTCGGGCCTGGTTAGTGCTTGGATGGGAGACCGCCTGGGAATACCAGGTGCTGTAAGCT
1580	seq1	4	47529786	47529904	minus	GCTTACGGCCATACCACCCTGGAAATGCCCGATCTCATCTGAACTCGGAAGTAAAGCAGGGTCGGGCCTGGTTAGTACTTGGATGGGAGACCGCCTGGGAATACCAGGTGCTGTAAGCT
1581	seq1	4	47529963	47530081	minus	GCTTACGGCCATACCACCCTGGAAATGCCCGATCTCATCTGAACTCGGAAGTAAAGCAGGGTCGGGCCTGGTTAGTACTTGGATGGGAGACCGCCTGGGAATACCAGGTGCTGTAAGCT
1582	seq1	4	47530140	47530258	minus	GCTTACGGCCATACCACCCTGGAAATGCCCGATCTCATCTGAACTCGGAAGTAAAGCAGGGTCGGGCCTGGTTAGTACTTGGATGGGAGACCGCCTGGGAATACCAGGTGCTGTAAGCT
1583	seq1	4	47530317	47530435	minus	GCTTACGGCCATACCACCCTGGAAATGCCCGATCTCATCTGAACTCGGAAGTAAAGCAGGGTCGGGCCTGGTTAGTACTTGGATGGGAGACCGCCTGGGAATACCAGGTGCTGTAAGCT
1584		4	47530494	47530612	minus	GCTTACGGCCATACCACCCTGGAAATGCCCGATCTCATCTGAACTCGGAAGTAAAGCAGGGTCGGGCCCGGTTAGTACTTGGATGGGAGACCGCCTGGGAATACCAGGTGCTGTAAGCT
1585		4	47530671	47530789	minus	GCTTACGGCCATACCACCCTGGAAATGCCCGATCTCATCTGAACTCGGAAGTAAAGCAGGGTCGGGCCCGGTTAGTACTTGGATGGGAGACCGCCTGGGAATACCAGGTGCTGTAAGCT
1586		4	47530848	47530966	minus	GCTTACGGCCATACCACCCTGGAGATGCCCGATCTCATCTGAACTCGGAAGTAAAGCAGGGTCGGGCCTGGTTAGTACTTGGATGGGAGACCGCCTGGGAATACCAGGTGCTGTAAGCT
1587	seq1	4	47531025	47531143	minus	GCTTACGGCCATACCACCCTGGAAATGCCCGATCTCATCTGAACTCGGAAGTAAAGCAGGGTCGGGCCTGGTTAGTACTTGGATGGGAGACCGCCTGGGAATACCAGGTGCTGTAAGCT
1588	seq1	4	47531202	47531320	minus	GCTTACGGCCATACCACCCTGGAAATGCCCGATCTCATCTGAACTCGGAAGTAAAGCAGGGTCGGGCCTGGTTAGTACTTGGATGGGAGACCGCCTGGGAATACCAGGTGCTGTAAGCT
1589	seq1	4	47531379	47531497	minus	GCTTACGGCCATACCACCCTGGAAATGCCCGATCTCATCTGAACTCGGAAGTAAAGCAGGGTCGGGCCTGGTTAGTACTTGGATGGGAGACCGCCTGGGAATACCAGGTGCTGTAAGCT
1590	seq1	4	47531556	47531674	minus	GCTTACGGCCATACCACCCTGGAAATGCCCGATCTCATCTGAACTCGGAAGTAAAGCAGGGTCGGGCCTGGTTAGTACTTGGATGGGAGACCGCCTGGGAATACCAGGTGCTGTAAGCT
1591		4	47531733	47531851	minus	GCTTACGGCCATACCACCCTGGAAATGCCCGATCTCATCTGAACTCGGAAGTAAAGCAGGGTCGGGCCCGGTTAGTACTTGGATGGGAGACCGCCTGGGAATACCAGGTGCTGTAAGCT
1592		4	47531910	47532028	minus	GCTTACGGCCATACCACCCTGGAAATGCCCAATCTCATCTGAACTCGGAAGTAAAGCAGGGTCGAGCCTGGTTAGTACTTGGATGGGAGACCGCCTGGGAATACCAGGTGCTGTAAGCT
1593	seq1	4	47532087	47532205	minus	GCTTACGGCCATACCACCCTGGAAATGCCCGATCTCATCTGAACTCGGAAGTAAAGCAGGGTCGGGCCTGGTTAGTACTTGGATGGGAGACCGCCTGGGAATACCAGGTGCTGTAAGCT
1594		4	47532264	47532382	minus	GCTTACGGCCATACCACCCTGGAAATGCCCGATCTCATCTGAACTCGGAAGTAAAGCAGGGTCGGGCCCGGTTAGTACTTGGATGGGAGACCGCCTGGGAATACCAGGTGCTGTAAGCT
1595		4	47532441	47532559	minus	GCTTACGGCCATACCACCCTGGAAATGCCCAATCTCATCTGAACTCGGAAGTAAAGCAGGGTCGAGCCTGGTTAGTACTTGGATGGGAGACCGCCTGGGAATACCAGGTGCTGTAAGCT
1596	seq1	4	47532618	47532736	minus	GCTTACGGCCATACCACCCTGGAAATGCCCGATCTCATCTGAACTCGGAAGTAAAGCAGGGTCGGGCCTGGTTAGTACTTGGATGGGAGACCGCCTGGGAATACCAGGTGCTGTAAGCT
1597		4	47532795	47532913	minus	GCTTACGGCCATACCACCCTGGAAATGCCCGATCTCATCTGAACTCGGAAGTAAAGCAGGGTCGGGCCCGGTTAGTACTTGGATGGGAGACCGCCTGGGAATACCAGGTGCTGTAAGCT
1598		4	47532972	47533090	minus	GCTTACGGCCATACCACCCTGGAAATGCCCAATCTCATCTGAACTCGGAAGTAAAGCAGGGTCGAGCCTGGTTAGTACTTGGATGGGAGACCGCCTGGGAATACCAGGTGCTGTAAGCT
1599	seq1	4	47533149	47533267	minus	GCTTACGGCCATACCACCCTGGAAATGCCCGATCTCATCTGAACTCGGAAGTAAAGCAGGGTCGGGCCTGGTTAGTACTTGGATGGGAGACCGCCTGGGAATACCAGGTGCTGTAAGCT
1600		4	47533326	47533444	minus	GCTTACGGCCATACCACCCTGGAAATGCCCGATCTCATCTGAATTCGGAAGTAAAGCAGGGTCGGGCCCGGTTAGTACTTGGATGGGAGACCGCCTGGGAATACCAGGTGCTGTAAGCT
1601		4	47533503	47533621	minus	GCTTACGGCCATACCACCCTGGAAATGCCCAATCTCATCTGAACTCGGAAGTAAAGCAGGGTCGAGCCTGGTTAGTACTTGGATGGGAGACCGCCTGGGAATACCAGGTGCTGTAAGCT
1602	seq1	4	47533680	47533798	minus	GCTTACGGCCATACCACCCTGGAAATGCCCGATCTCATCTGAACTCGGAAGTAAAGCAGGGTCGGGCCTGGTTAGTACTTGGATGGGAGACCGCCTGGGAATACCAGGTGCTGTAAGCT
1603		4	47533857	47533975	minus	GCTTACGGCCATACCACCCTGGAAATGCCCGATCTCATCTGAACTCGGAAGTAAAGCAGGGTCGGGCCCGGTTAGTACTTGGATGGGAGACCGCCTGGGAATACCAGGTGCTGTAAGCT
1604		4	47534034	47534152	minus	GCTTACGGCCATACCACCCTGGAAATGCCCAATCTCATCTGAACTCGGAAGTAAAGCAGGGTCGAGCCTGGTTAGTACTTGGATGGGAGACCGCCTGGGAATACCAGGTGCTGTAAGCT
1605	seq1	4	47534211	47534329	minus	GCTTACGGCCATACCACCCTGGAAATGCCCGATCTCATCTGAACTCGGAAGTAAAGCAGGGTCGGGCCTGGTTAGTACTTGGATGGGAGACCGCCTGGGAATACCAGGTGCTGTAAGCT
1606		4	47534388	47534506	minus	GCTTACGGCCATACCACCCTGGAAATGCCCGATCTCATCTGAACTCGGAAGTAAAGCAGGGTCGGGCCCGGTTAGTACTTGGATGGGAGACCGCCTGGGAATACCAGGTGCTGTAAGCT
1607		4	47534565	47534683	minus	GCTTACGGCCATACCACCCTGGAAATGCCCAATCTCATCTGAACTCGGAAGTAAAGCAGGGTCGAGCCTGGTTAGTACTTGGATGGGAGACCGCCTGGGAATACCAGGTGCTGTAAGCT
1608	seq1	4	47534742	47534860	minus	GCTTACGGCCATACCACCCTGGAAATGCCCGATCTCATCTGAACTCGGAAGTAAAGCAGGGTCGGGCCTGGTTAGTACTTGGATGGGAGACCGCCTGGGAATACCAGGTGCTGTAAGCT
1609		4	47534919	47535037	minus	GCTTACGGCCATACCACCCTGGAAATGCCCGATCTCATCTGAACTCGGAAGTAAAGCAGGGTCGGGCCCGGTTAGTACTTGGATGGGAGACCGCCTGGGAATACCAGGTGCTGTAAGCT
1610		4	47535096	47535214	minus	GCTTACGGCCATACCACCCTGGAAATGCCCAATCTCATCTGAACTCGGAAGTAAAGCAGGGTCGAGCCTGGTTAGTACTTGGATGGGAGACCGCCTGGGAATACCAGGTGCTGTAAGCT
1611	seq1	4	47535273	47535391	minus	GCTTACGGCCATACCACCCTGGAAATGCCCGATCTCATCTGAACTCGGAAGTAAAGCAGGGTCGGGCCTGGTTAGTACTTGGATGGGAGACCGCCTGGGAATACCAGGTGCTGTAAGCT
1612		4	47535450	47535568	minus	GCTTACGGCCATACCACCCTGGAAATGCCCGATCTCATCTGAACTCGGAAGTAAAGCAGGGTCGGGCCCGGTTAGTACTTGGATGGGAGACCGCCTGGGAATACCAGGTGCTGTAAGCT
1613		4	47535627	47535745	minus	GCTTACGGCCATACCACCCTGGAAATGCCCAATCTCATCTGAACTCGGAAGTAAAGCAGGGTCGAGCCTGGTTAGTACTTGGATGGGAGACCGCCTGGGAATACCAGGTGCTGTAAGCT
1614	seq1	4	47535804	47535922	minus	GCTTACGGCCATACCACCCTGGAAATGCCCGATCTCATCTGAACTCGGAAGTAAAGCAGGGTCGGGCCTGGTTAGTACTTGGATGGGAGACCGCCTGGGAATACCAGGTGCTGTAAGCT
1615		4	47535981	47536099	minus	GCTTACGGCCATACCACCCTGGAAATGCCCGATCTCATCTGAACTCGGAAGTAAAGCAGGGTCGGGCCCGGTTAGTACTTGGATGGGAGACCGCCTGGGAATACCAGGTGCTGTAAGCT
1616		4	47536158	47536276	minus	GCTTACGGCCATACCACCCTGGAAATGCCCAATCTCATCTGAACTCGGAAGTAAAGCAGGGTCGAGCCTGGTTAGTACTTGGATGGGAGACCGCCTGGGAATACCAGGTGCTGTAAGCT
1617	seq48	4	47536335	47536453	minus	GCTAACGGCCATACCACCCTGGAAATGCCCGATCTCATCTGAACTCGGAAGTAAAGCAGGGTCGGGCCTGGTTAGTACTTGGATGGGAGACCGCCTGGGAATACCAGGTGCTGTAAGCT
1618	seq1	4	47545806	47545924	minus	GCTTACGGCCATACCACCCTGGAAATGCCCGATCTCATCTGAACTCGGAAGTAAAGCAGGGTCGGGCCTGGTTAGTACTTGGATGGGAGACCGCCTGGGAATACCAGGTGCTGTAAGCT
1619	seq1	4	47545983	47546101	minus	GCTTACGGCCATACCACCCTGGAAATGCCCGATCTCATCTGAACTCGGAAGTAAAGCAGGGTCGGGCCTGGTTAGTACTTGGATGGGAGACCGCCTGGGAATACCAGGTGCTGTAAGCT
1620		4	47546160	47546278	minus	GCTTACGGCCATACCACCCTGGAAATACCCGATCTCATCTGAACTCGGAAGTAAAGCAGGGTCGGGCCCGGTTAGTACTTGGATGGGAGACCGCCTGGGAATACCAGGTGCTGTAAGCT
1621	seq1	4	47546337	47546455	minus	GCTTACGGCCATACCACCCTGGAAATGCCCGATCTCATCTGAACTCGGAAGTAAAGCAGGGTCGGGCCTGGTTAGTACTTGGATGGGAGACCGCCTGGGAATACCAGGTGCTGTAAGCT
1622		4	47546514	47546632	minus	GCTTACGGCCATACCACCCTGGAAATGCCCGATCTCATCTGAACTCGGAAGTAAAGCAGGGTCGGGCCCAGTTAGTACTTGGATGGGAGACCGCCTGGGAATACCAGGTGCTGTAAGCT
1623		4	47546691	47546809	minus	GCTTACGGCCATACCACCCTGGAAATGCTCGATCTCATCTGAACTCGGAAGTAAAGCAGGGTCGGGCCTGGTTAGTACTTGGATGGGAGACCGCCTGGGAATACCAGGTGCTGTAAGCT
1624	seq1	4	47546868	47546986	minus	GCTTACGGCCATACCACCCTGGAAATGCCCGATCTCATCTGAACTCGGAAGTAAAGCAGGGTCGGGCCTGGTTAGTACTTGGATGGGAGACCGCCTGGGAATACCAGGTGCTGTAAGCT
1625		4	47547045	47547163	minus	GCTTACGGCCATACCACCCTGGAAATGCCCGATCTCATCTGAACTCGGAAGTAAAGCAGGGTCGGGCCCGGTTAGTACTTGGATGGGAGACCGCCTGGGAATACCAGGTGCTGTAAGCT
1626		4	47547222	47547340	minus	GCTTACGGCCATACCACCCTGGAAATGCCCAATCTCATCTGAACTCGGAAGTAAAGCAGGGTCGAGCCTGGTTAGTACTTGGATGGGAGACCGCCTGGGAATACCAGGTGCTGTAAGCT
1627	seq1	4	47547399	47547517	minus	GCTTACGGCCATACCACCCTGGAAATGCCCGATCTCATCTGAACTCGGAAGTAAAGCAGGGTCGGGCCTGGTTAGTACTTGGATGGGAGACCGCCTGGGAATACCAGGTGCTGTAAGCT
1628		4	47547576	47547694	minus	GCTTACGGCCATACCACCCTGGAAATGCCCGATCTCATCTGAACTCGGAAGTAAAGCAGGGTCGGGCCCGGTTAGTACTTGGATGGGAGACCGCCTGGGAATACCAGGTGCTGTAAGCT
1629		4	47547753	47547871	minus	GCTTACGGCCATACCACCCTGGAAATGCCCAATCTCATCTGAACTCGGAAGTAAAGCAGGGTCGAGCCTGGTTAGTACTTGGATGGGAGACCGCCTGGGAATACCAGGTGCTGTAAGCT
1630	seq1	4	47547930	47548048	minus	GCTTACGGCCATACCACCCTGGAAATGCCCGATCTCATCTGAACTCGGAAGTAAAGCAGGGTCGGGCCTGGTTAGTACTTGGATGGGAGACCGCCTGGGAATACCAGGTGCTGTAAGCT
1631		4	47548107	47548225	minus	GCTTACGGCCATACCACCCTGGAAATGCCCGATCTCATCTGAACTCGGAAGTAAAGCAGGGTCGGGCCCGGTTAGTACTTGGATGGGAGACCGCCTGGGAATACCAGGTGCTGTAAGCT
1632		4	47548284	47548402	minus	GCTTACGGCCATACCACCCTGGAAATGCCCAATCTCATCTGAACTCGGAAGTAAAGCAGGGTCGAGCCTGGTTAGTACTTGGATGGGAGACCGCCTGGGAATACCAGGTGCTGTAAGCT
1633	seq1	4	47548461	47548579	minus	GCTTACGGCCATACCACCCTGGAAATGCCCGATCTCATCTGAACTCGGAAGTAAAGCAGGGTCGGGCCTGGTTAGTACTTGGATGGGAGACCGCCTGGGAATACCAGGTGCTGTAAGCT
1634		4	47548638	47548756	minus	GCTTACGGCCATACCACCCTGGAAATGCCCGATCTCATCTGAACTCGGAAGTAAAGCAGGGTCGGGCCCGGTTAGTACTTGGATGGGAGACCGCCTGGGAATACCAGGTGCTGTAAGCT
1635		4	47548815	47548933	minus	GCTTACGGCCATACCACCCTGGAAATGCCCAATCTCATCTGAACTCGGAAGTAAAGCAGGGTCGAGCCTGGTTAGTACTTGGATGGGAGACCGCCTGGGAATACCAGGTGCTGTAAGCT
1636	seq1	4	47548992	47549110	minus	GCTTACGGCCATACCACCCTGGAAATGCCCGATCTCATCTGAACTCGGAAGTAAAGCAGGGTCGGGCCTGGTTAGTACTTGGATGGGAGACCGCCTGGGAATACCAGGTGCTGTAAGCT
1637		4	47549169	47549287	minus	GCTTACGGCCATACCACCCTGGAAATGCCCGATCTCATCTGAACTCGGAAGTAAAGCAGGGTCGGGCCCGGTTAGTACTTGGATGGGAGACCGCCTGGGAATACCAGGTGCTGTAAGCT
1638		4	47549346	47549464	minus	GCTTACGGCCATACCACCCTGGAAATGCCCAATCTCATCTGAACTCGGAAGTAAAGCAGGGTCGAGCCTGGTTAGTACTTGGATGGGAGACCGCCTGGGAATACCAGGTGCTGTAAGCT
1639	seq1	4	47549523	47549641	minus	GCTTACGGCCATACCACCCTGGAAATGCCCGATCTCATCTGAACTCGGAAGTAAAGCAGGGTCGGGCCTGGTTAGTACTTGGATGGGAGACCGCCTGGGAATACCAGGTGCTGTAAGCT
1640		4	47549700	47549818	minus	GCTTACGGCCATACCACCCTGGAAATGCCCGATCTCATCTGAACTCGGAAGTAAAGCAGGGTCGGGCCCGGTTAGTACTTGGATGGGAGACCGCCTGGGAATACCAGGTGCTGTAAGCT
1641		4	47549877	47549995	minus	GCTTACGGCCATACCACCCTGGAAATGCCCAATCTCATCTGAACTCGGAAGTAAAGCAGGGTCGAGCCTGGTTAGTACTTGGATGGGAGACCGCCTGGGAATACCAGGTGCTGTAAGCT
1642	seq1	4	47550054	47550172	minus	GCTTACGGCCATACCACCCTGGAAATGCCCGATCTCATCTGAACTCGGAAGTAAAGCAGGGTCGGGCCTGGTTAGTACTTGGATGGGAGACCGCCTGGGAATACCAGGTGCTGTAAGCT
1643		4	47550231	47550349	minus	GCTTACGGCCATACCACCCTGGAAATGCCCGATCTCATCTGAACTCGGAAGTAAAGCAGGGTCGGGCCCGGTTAGTACTTGGATGGGAGACCGCCTGGGAATACCAGGTGCTGTAAGCT
1644		4	47550408	47550526	minus	GCTTACGGCCATACCACCCTGGAAATGCCCAATCTCATCTGAACTCGGAAGTAAAGCAGGGTCGAGCCTGGTTAGTACTTGGATGGGAGACCGCCTGGGAATACCAGGTGCTGTAAGCT
1645		4	47550585	47550703	minus	GCTTACGGCCATACCACCCTGGAAATGCCCGATCTCATCTGAACTCGGAAGTAAAGCAGGGTCGGGCCCGGTTAGTACTTGGATGGGAGACCGCCTGGGAATACCAGGTGCTGTAAGCT
1646	seq1	4	47550762	47550880	minus	GCTTACGGCCATACCACCCTGGAAATGCCCGATCTCATCTGAACTCGGAAGTAAAGCAGGGTCGGGCCTGGTTAGTACTTGGATGGGAGACCGCCTGGGAATACCAGGTGCTGTAAGCT
1647		4	47550939	47551057	minus	GCTTACGGCCATACCACCCTGGAAATGCCCGATCTCATCTGAACTCGGAAGTAAAGCAGGGTCGGGCCCGGTTAGTACTTGGATGGGAGACCGCCTGGGAATACCAGGTGCTGTAAGCT
1648		4	47551116	47551234	minus	GCTTACGGCCATACCACCCTGGAAATGCCCGATCTCATCTGAACTCGGAAGTAAAGCAGGGTCGGGCCCGGTTAGTACTTGGATGGGAGACCGCCTGGGAATACCAGGTGCTGTAAGCT
1649	seq1	4	47551293	47551411	minus	GCTTACGGCCATACCACCCTGGAAATGCCCGATCTCATCTGAACTCGGAAGTAAAGCAGGGTCGGGCCTGGTTAGTACTTGGATGGGAGACCGCCTGGGAATACCAGGTGCTGTAAGCT
1650	seq1	4	47551470	47551588	minus	GCTTACGGCCATACCACCCTGGAAATGCCCGATCTCATCTGAACTCGGAAGTAAAGCAGGGTCGGGCCTGGTTAGTACTTGGATGGGAGACCGCCTGGGAATACCAGGTGCTGTAAGCT
1651	seq1	4	47557347	47557465	minus	GCTTACGGCCATACCACCCTGGAAATGCCCGATCTCATCTGAACTCGGAAGTAAAGCAGGGTCGGGCCTGGTTAGTACTTGGATGGGAGACCGCCTGGGAATACCAGGTGCTGTAAGCT
1652		4	47557524	47557642	minus	GCTTACGGCCATACCACCCTGGAAATGCCCGATCTCATCTGAACTCGGAAGTAAAGCAGGGTCGGGCCCGGTTAGTACTTGGATGGGAGACCGCCTGGGAATACCAGGTGCTGTAAGCT
1653		4	47557701	47557819	minus	GCTTACGGCCATACCACCCTGGAAATGCCCAATCTCATCTGAACTCGGAAGTAAAGCAGGGTCGAGCCTGGTTAGTACTTGGATGGGAGACCGCCTGGGAATACCAGGTGCTGTAAGCT
1654	seq1	4	47557878	47557996	minus	GCTTACGGCCATACCACCCTGGAAATGCCCGATCTCATCTGAACTCGGAAGTAAAGCAGGGTCGGGCCTGGTTAGTACTTGGATGGGAGACCGCCTGGGAATACCAGGTGCTGTAAGCT
1655		4	47558055	47558173	minus	GCTTACGGCCATACCACCCTGGAAATGCCCGATCTCATCTGAACTCGGAAGTAAAGCAGGGTCGGGCCCGGTTAGTACTTGGATGGGAGACCGCCTGGGAATACCAGGTGCTGTAAGCT
1656		4	47558232	47558350	minus	GCTTACGGCCATACCACCCTGGAAATGCCCAATCTCATCTGAACTCGGAAGTAAAGCAGGGTCGAGCCTGGTTAGTACTTGGATGGGAGACCGCCTGGGAATTCCAGGTGCTGTAAGCT
1657	seq1	4	47558409	47558527	minus	GCTTACGGCCATACCACCCTGGAAATGCCCGATCTCATCTGAACTCGGAAGTAAAGCAGGGTCGGGCCTGGTTAGTACTTGGATGGGAGACCGCCTGGGAATACCAGGTGCTGTAAGCT
1658		4	47558586	47558704	minus	GCTTACGGCCATACCACCCTGGAAATGCCCGATCTCATCTGAACTCGGAAGTAAAGCAGGGTCGGGCCCGGTTAGTACTTGGATGGGAGACCGCCTGGGAATACCAGGTGCTGTAAGCT
1659		4	47558763	47558881	minus	GCTTACGGCCATACCACCCTGGAAATGCCCAATCTCATCTGAACTCGGAAGTAAAGCAGGGTCGAGCCTGGTTAGTACTTGGATGGGAGACCGCCTGGGAATACCAGGTGCTGTAAGCT
1660	seq1	4	47558940	47559058	minus	GCTTACGGCCATACCACCCTGGAAATGCCCGATCTCATCTGAACTCGGAAGTAAAGCAGGGTCGGGCCTGGTTAGTACTTGGATGGGAGACCGCCTGGGAATACCAGGTGCTGTAAGCT
1661		4	47559117	47559235	minus	GCTTACGGCCATACCACCCTGGAAATGCCCGATCTCATCTGAACTCGGAAGTAAAGCAGGGTCGGGCCCGGTTAGTACTTGGATGGGAGACCGCCTGGGAATACCAGGTGCTGTAAGCT
1662		4	47559294	47559412	minus	GCTTACGGCCATACCACCCTGGAAATGCCCAATCTCATCTGAACTCGGAAGTAAAGCAGGGTCGAGCCTGGTTAGTACTTGGATGGGAGACCGCCTGGGAATACCAGGTGCTGTAAGCT
1663	seq1	4	47559471	47559589	minus	GCTTACGGCCATACCACCCTGGAAATGCCCGATCTCATCTGAACTCGGAAGTAAAGCAGGGTCGGGCCTGGTTAGTACTTGGATGGGAGACCGCCTGGGAATACCAGGTGCTGTAAGCT
1664		4	47559648	47559766	minus	GCTTACGGCCATACCACCCTGGAAATGCCCGATCTCATCTGAACTCGGAAGTAAAGCAGGGTCGGGCCCGGTTAGTACTTGGATGGGAGACCGCCTGGGAATACCAGGTGCTGTAAGCT
1665		4	47559825	47559943	minus	GCTTACGGCCATACCACCCTGGAAATGCCCAATCTCATCTGAACTCGGAAGTAAAGCAGGGTCGAGCCTGGTTAGTACTTGGATGGGAGACCGCCTGGGAATACCAGGTGCTGTAAGCT
1666	seq1	4	47560002	47560120	minus	GCTTACGGCCATACCACCCTGGAAATGCCCGATCTCATCTGAACTCGGAAGTAAAGCAGGGTCGGGCCTGGTTAGTACTTGGATGGGAGACCGCCTGGGAATACCAGGTGCTGTAAGCT
1667		4	47560179	47560297	minus	GCTTACGGCCATACCACCCTGGAAATGCCCGATCTCATCTGAACTCGGAAGTAAAGCAGGGTCGGGCCCGGTTAGTACTTGGATGGGAGACCGCCTGGGAATACCAGGTGCTGTAAGCT
1668		4	47560356	47560474	minus	GCTTACGGCCATACCACCCTGGAAATGCCCAATCTCATCTGAACTCGGAAGTAAAGCAGGGTCGAGCCTGGTTAGTACTTGGATGGGAGACCGCCTGGGAATACCAGGTGCTGTAAGCT
1669	seq1	4	47560533	47560651	minus	GCTTACGGCCATACCACCCTGGAAATGCCCGATCTCATCTGAACTCGGAAGTAAAGCAGGGTCGGGCCTGGTTAGTACTTGGATGGGAGACCGCCTGGGAATACCAGGTGCTGTAAGCT
1670		4	47560710	47560828	minus	GCTTACGGCCATACCACCCTGGAAATGCCCGATCTCATCTGAACTCGGAAGTAAAGCAGGGTCGGGCCCGGTTAGTACTTGGATGGGAGACCGCCTGGGAATACCAGGTGCTGTAAGCT
1671		4	47560887	47561005	minus	GCTTACGGCCATACCACCCTGGAAATGCCCAATCTCATCTGAACTCGGAAGTAAAGCAGGGTCGAGCCTGGTTAGTACTTGGATGGGAGACCGCCTGGGAATACCAGGTGCTGTAAGCT
1672	seq1	4	47561064	47561182	minus	GCTTACGGCCATACCACCCTGGAAATGCCCGATCTCATCTGAACTCGGAAGTAAAGCAGGGTCGGGCCTGGTTAGTACTTGGATGGGAGACCGCCTGGGAATACCAGGTGCTGTAAGCT
1673		4	47561241	47561359	minus	GCTTACGGCCATACCACCCTGGAAATGCCCGATCTCATCTGAACTCGGAAGTAAAGCAGGGTCGGGCCCGGTTAGTACTTGGATGGGAGACCGCCTGGGAATACCAGGTGCTGTAAGCT
1674		4	47561418	47561536	minus	GCTTACGGCCATACCACCCTGGAAATGCCCAATCTCATCTGAACTCGGAAGTAAAGCAGGGTCGAGCCTGGTTAGTACTTGGATGGGAGACCGCCTGGGAATACCAGGTGCTGTAAGCT
1675	seq1	4	47561595	47561713	minus	GCTTACGGCCATACCACCCTGGAAATGCCCGATCTCATCTGAACTCGGAAGTAAAGCAGGGTCGGGCCTGGTTAGTACTTGGATGGGAGACCGCCTGGGAATACCAGGTGCTGTAAGCT
1676		4	47561772	47561890	minus	GCTTACGGCCATACCACCCTGGAAATGCCCGATCTCATCTGAACTCGGAAGTAAAGCAGGGTCGGGCCCGGTTAGTACTTGGATGGGAGACCGCCTGGGAATACCAGGTGCTGTAAGCT
1677		4	47561949	47562067	minus	GCTTACGGCCATACCACCCTGGAAATGCCCAATCTCATCTGAACTCGGAAGTAAAGCAGGGTCGAGCCTGGTTAGTACTTGGATGGGAGACCGCCTGGGAATACCAGGTGCTGTAAGCT
1678	seq1	4	47562126	47562244	minus	GCTTACGGCCATACCACCCTGGAAATGCCCGATCTCATCTGAACTCGGAAGTAAAGCAGGGTCGGGCCTGGTTAGTACTTGGATGGGAGACCGCCTGGGAATACCAGGTGCTGTAAGCT
1679		4	47562303	47562421	minus	GCTTACGGCCATACCACCCTGGAAATGCCCGATCTCATCTGAACTCGGAAGTAAAGCAGGGTCGGGCCCGGTTAGTACTTGGATGGGAGACCGCCTGGGAATACCAGGTGCTGTAAGCT
1680		4	47562480	47562598	minus	GCTTACGGCCATACCACCCTGGAAATGCCCAATCTCATCTGAACTCGGAAGTAAAGCAGGGTCGAGCCTGGTTAGTACTTGGATGGGAGACCGCCTGGGAATACCAGGTGCTGTAAGCT
1681	seq1	4	47562657	47562775	minus	GCTTACGGCCATACCACCCTGGAAATGCCCGATCTCATCTGAACTCGGAAGTAAAGCAGGGTCGGGCCTGGTTAGTACTTGGATGGGAGACCGCCTGGGAATACCAGGTGCTGTAAGCT
1682		4	47562834	47562952	minus	GCTTACGGCCATACCACCCTGGAAATGCCCGATCTCATCTGAACTCGGAAGTAAAGCAGGGTCGGGCCCGGTTAGTACTTGGATGGGAGACCGCCTGGGAATACCAGGTGCTGTAAGCT
1683		4	47563011	47563129	minus	GCTTACGGCCATACCACCCTGGAAATGCCCAATCTCATCTGAACTCGGAAGTAAAGCAGGGTCGAGCCTGGTTAGTACTTGGATGGGAGACCGCCTGGGAATACCAGGTGCTGTAAGCT
1684	seq1	4	47563188	47563306	minus	GCTTACGGCCATACCACCCTGGAAATGCCCGATCTCATCTGAACTCGGAAGTAAAGCAGGGTCGGGCCTGGTTAGTACTTGGATGGGAGACCGCCTGGGAATACCAGGTGCTGTAAGCT
1685		4	47563365	47563483	minus	GCTTACGGCCATACCACCCTGGAAATGCCCGATCTCATCTGAACTCGGAAGTAAAGCAGGGTCGGGCCCGGTTAGTACTTGGATGGGAGACCGCCTGGGAATACCAGGTGCTGTAAGCT
1686		4	47563542	47563660	minus	GCTTACGGCCATACCACCCTGGAAATGCCCAATCTCATCTGAACTCGGAAGTAAAGCAGGGTCGAGCCTGGTTAGTACTTGGATGGGAGACCGCCTGGGAATACCAGGTGCTGTAAGCT
1687	seq1	4	47563719	47563837	minus	GCTTACGGCCATACCACCCTGGAAATGCCCGATCTCATCTGAACTCGGAAGTAAAGCAGGGTCGGGCCTGGTTAGTACTTGGATGGGAGACCGCCTGGGAATACCAGGTGCTGTAAGCT
1688		4	47563896	47564014	minus	GCTTACGGCCATACCACCCTGGAAATGCCCGATCTCATCTGAACTCGGAAGTAAAGCAGGGTCGGGCCCGGTTAGTACTTGGATGGGAGACCGCCTGGGAATACCAGGTGCTGTAAGCT
1689		4	47564073	47564191	minus	GCTTACGGCCATACCACCCTGGAAATGCCCAATCTCATCTGAACTCGGAAGTAAAGCAGGGTCGAGCCTGGTTAGTACTTGGATGGGAGACCGCCTGGGAATACCAGGTGCTGTAAGCT
1690	seq1	4	47564250	47564368	minus	GCTTACGGCCATACCACCCTGGAAATGCCCGATCTCATCTGAACTCGGAAGTAAAGCAGGGTCGGGCCTGGTTAGTACTTGGATGGGAGACCGCCTGGGAATACCAGGTGCTGTAAGCT
1691		4	47564427	47564545	minus	GCTTACGGCCATACCACCCTGGAAATGCCCGATCTCATCTGAACTCGGAAGTAAAGCAGGGTCGGGCCCGGTTAGTACTTGGATGGGAGACCGCCTGGGAATACCAGGTGCTGTAAGCT
1692		4	47564604	47564722	minus	GCTTACGGCCATACCACCCTGGAAATGCCCAATCTCATCTGAACTCGGAAGTAAAGCAGGGTCGAGCCTGGTTAGTACTTGGATGGGAGACCGCCTGGGAATACCAGGTGCTGTAAGCT
1693	seq1	4	47564781	47564899	minus	GCTTACGGCCATACCACCCTGGAAATGCCCGATCTCATCTGAACTCGGAAGTAAAGCAGGGTCGGGCCTGGTTAGTACTTGGATGGGAGACCGCCTGGGAATACCAGGTGCTGTAAGCT
1694		4	47564958	47565076	minus	GCTTACGGCCATACCACCCTGGAAATGCCCGATCTCATCTGAACTCGGAAGTAAAGCAGGGTCGGGCCCGGTTAGTACTTGGATGGGAGACCGCCTGGGAATACCAGGTGCTGTAAGCT
1695		4	47565135	47565253	minus	GCTTACGGCCATACCACCCTGGAAATGCCCAATCTCATCTGAACTCGGAAGTAAAGCAGGGTCGAGCCTGGTTAGTACTTGGATGGGAGACCGCCTGGGAATACCAGGTGCTGTAAGCT
1696	seq1	4	47565312	47565430	minus	GCTTACGGCCATACCACCCTGGAAATGCCCGATCTCATCTGAACTCGGAAGTAAAGCAGGGTCGGGCCTGGTTAGTACTTGGATGGGAGACCGCCTGGGAATACCAGGTGCTGTAAGCT
1697		4	47565489	47565607	minus	GCTTACGGCCATACCACCCTGGAAATGCCCGATCTCATCTGAACTCGGAAGTAAAGCAGGGTCGGGCCCGGTTAGTACTTGGATGGGAGACCGCCTGGGAATACCAGGTGCTGTAAGCT
1698		4	47565666	47565784	minus	GCTTACGGCCATACCACCCTGGAAATGCCCAATCTCATCTGAACTCGGAAGTAAAGCAGGGTCGAGCCTGGTTAGTACTTGGATGGGAGACCGCCTGGGAATACCAGGTGCTGTAAGCT
1699	seq1	4	47565843	47565961	minus	GCTTACGGCCATACCACCCTGGAAATGCCCGATCTCATCTGAACTCGGAAGTAAAGCAGGGTCGGGCCTGGTTAGTACTTGGATGGGAGACCGCCTGGGAATACCAGGTGCTGTAAGCT
1700		4	47566020	47566138	minus	GCTTACGGCCATACCACCCTGGAAATGCCCGATCTCATCTGAACTCGGAAGTAAAGCAGGGTCGGGCCCGGTTAGTACTTGGATGGGAGACCGCCTGGGAATACCAGGTGCTGTAAGCT
1701		4	47566197	47566315	minus	GCTTACGGCCATACCACCCTGGAAATGCCCAATCTCATCTGAACTCGGAAGTAAAGCAGGGTCGAGCCTGGTTAGTACTTGGATGGGAGACCGCCTGGGAATACCAGGTGCTGTAAGCT
1702	seq1	4	47566374	47566492	minus	GCTTACGGCCATACCACCCTGGAAATGCCCGATCTCATCTGAACTCGGAAGTAAAGCAGGGTCGGGCCTGGTTAGTACTTGGATGGGAGACCGCCTGGGAATACCAGGTGCTGTAAGCT
1703		4	47566551	47566669	minus	GCTTACGGCCATACCACCCTGGAAATGCCCGATCTCATCTGAACTCGGAAGTAAAGCAGGGTCGGGCCCGGTTAGTACTTGGATGGGAGACCGCCTGGGAATACCAGGTGCTGTAAGCT
1704		4	47566728	47566846	minus	GCTTACGGCCATACCACCCTGGAAATGCCCAATCTCATCTGAACTCGGAAGTAAAGCAGGGTCGAGCCTGGTTAGTACTTGGATGGGAGACCGCCTGGGAATACCAGGTGCTGTAAGCT
1705	seq1	4	47566905	47567023	minus	GCTTACGGCCATACCACCCTGGAAATGCCCGATCTCATCTGAACTCGGAAGTAAAGCAGGGTCGGGCCTGGTTAGTACTTGGATGGGAGACCGCCTGGGAATACCAGGTGCTGTAAGCT
1706		4	47567082	47567200	minus	GCTTACGGCCATACCACCCTGGAAATGCCCGATCTCATCTGAACTCGGAAGTAAAGCAGGGTCGGGCCCGGTTAGTACTTGGATGGGAGACCGCCTGGGAATACCAGGTGCTGTAAGCT
1707		4	47567259	47567377	minus	GCTTACGGCCATACCACCCTGGAAATGCCCAATCTCATCTGAACTCGGAAGTAAAGCAGGGTCGAGCCTGGTTAGTACTTGGATGGGAGACCGCCTGGGAATACCAGGTGCTGTAAGCT
1708	seq1	4	47567436	47567554	minus	GCTTACGGCCATACCACCCTGGAAATGCCCGATCTCATCTGAACTCGGAAGTAAAGCAGGGTCGGGCCTGGTTAGTACTTGGATGGGAGACCGCCTGGGAATACCAGGTGCTGTAAGCT
1709		4	47567613	47567731	minus	GCTTACGGCCATACCACCCTGGAAATGCCCGATCTCATCTGAACTCGGAAGTAAAGCAGGGTCGGGCCCGGTTAGTACTTGGATGGGAGACCGCCTGGGAATACCAGGTGCTGTAAGCT
1710		4	47567790	47567908	minus	GCTTACGGCCATACCACCCTGGAAATGCCCAATCTCATCTGAACTCGGAAGTAAAGCAGGGTCGAGCCTGGTTAGTACTTGGATGGGAGACCGCCTGGGAATACCAGGTGCTGTAAGCT
1711	seq1	4	47567967	47568085	minus	GCTTACGGCCATACCACCCTGGAAATGCCCGATCTCATCTGAACTCGGAAGTAAAGCAGGGTCGGGCCTGGTTAGTACTTGGATGGGAGACCGCCTGGGAATACCAGGTGCTGTAAGCT
1712		4	47568144	47568262	minus	GCTTACGGCCATACCACCCTGGAAATGCCCGATCTCATCTGAACTCGGAAGTAAAGCAGGGTCGGGCCCGGTTAGTACTTGGATGGGAGACCGCCTGGGAATACCAGGTGCTGTAAGCT
1713		4	47568321	47568439	minus	GCTTACGGCCATACCACCCTGGAAATGCCCAATCTCATCTGAACTCGGAAGTAAAGCAGGGTCGAGCCTGGTTAGTACTTGGATGGGAGACCGCCTGGGAATACCAGGTGCTGTAAGCT
1714	seq1	4	47568498	47568616	minus	GCTTACGGCCATACCACCCTGGAAATGCCCGATCTCATCTGAACTCGGAAGTAAAGCAGGGTCGGGCCTGGTTAGTACTTGGATGGGAGACCGCCTGGGAATACCAGGTGCTGTAAGCT
1715		4	47568675	47568793	minus	GCTTACGGCCATACCACCCTGGAAATGCCCGATCTCATCTGAACTCGGAAGTAAAGCAGGGTCGGGCCCGGTTAGTACTTGGATGGGAGACCGCCTGGGAATACCAGGTGCTGTAAGCT
1716		4	47568852	47568970	minus	GCTTACGGCCATACCACCCTGGAAATGCCCAATCTCATCTGAACTCGGAAGTAAAGCAGGGTCGAGCCTGGTTAGTACTTGGATGGGAGACCGCCTGGGAATACCAGGTGCTGTAAGCT
1717	seq1	4	47569029	47569147	minus	GCTTACGGCCATACCACCCTGGAAATGCCCGATCTCATCTGAACTCGGAAGTAAAGCAGGGTCGGGCCTGGTTAGTACTTGGATGGGAGACCGCCTGGGAATACCAGGTGCTGTAAGCT
1718		4	47569206	47569324	minus	GCTTACGGCCATACCACCCTGGAAATGCCCGATCTCATCTGAACTCGGAAGTAAAGCAGGGTCGGGCCCGGTTAGTACTTGGATGGGAGACCGCCTGGGAATACCAGGTGCTGTAAGCT
1719		4	47569383	47569501	minus	GCTTACGGCCATACCACCCTGGAAATGCCCAATCTCATCTGAACTCGGAAGTAAAGCAGGGTCGAGCCTGGTTAGTACTTGGATGGGAGACCGCCTGGGAATACCAGGTGCTGTAAGCT
1720	seq1	4	47569560	47569678	minus	GCTTACGGCCATACCACCCTGGAAATGCCCGATCTCATCTGAACTCGGAAGTAAAGCAGGGTCGGGCCTGGTTAGTACTTGGATGGGAGACCGCCTGGGAATACCAGGTGCTGTAAGCT
1721		4	47569737	47569855	minus	GCTTACGGCCATACCACCCTGGAAATGCCCGATCTCATCTGAACTCGGAAGTAAAGCAGGGTCGGGCCCGGTTAGTACTTGGATGGGAGACCGCCTGGGAATACCAGGTGCTGTAAGCT
1722		4	47569914	47570032	minus	GCTTACGGCCATACCACCCTGGAAATGCCCAATCTCATCTGAACTCGGAAGTAAAGCAGGGTCGAGCCTGGTTAGTACTTGGATGGGAGACCGCCTGGGAATACCAGGTGCTGTAAGCT
1723	seq1	4	47570091	47570209	minus	GCTTACGGCCATACCACCCTGGAAATGCCCGATCTCATCTGAACTCGGAAGTAAAGCAGGGTCGGGCCTGGTTAGTACTTGGATGGGAGACCGCCTGGGAATACCAGGTGCTGTAAGCT
1724		4	47570268	47570386	minus	GCTTACGGCCATACCACCCTGGAAATGCCCGATCTCATCTGAACTCGGAAGTAAAGCAGGGTCGGGCCCGGTTAGTACTTGGATGGGAGACCGCCTGGGAATACCAGGTGCTGTAAGCT
1725		4	47570445	47570563	minus	GCTTACGGCCATACCACCCTGGAAATGCCCAATCTCATCTGAACTCGGAAGTAAAGCAGGGTCGAGCCTGGTTAGTACTTGGATGGGAGACCGCCTGGGAATACCAGGTGCTGTAAGCT
1726	seq1	4	47570622	47570740	minus	GCTTACGGCCATACCACCCTGGAAATGCCCGATCTCATCTGAACTCGGAAGTAAAGCAGGGTCGGGCCTGGTTAGTACTTGGATGGGAGACCGCCTGGGAATACCAGGTGCTGTAAGCT
1727		4	47570799	47570917	minus	GCTTACGGCCATACCACCCTGGAAATGCCCGATCTCATCTGAACTCGGAAGTAAAGCAGGGTCGGGCCCGGTTAGTACTTGGATGGGAGACCGCCTGGGAATACCAGGTGCTGTAAGCT
1728		4	47570976	47571094	minus	GCTTACGGCCATACCACCCTGGAAATGCCCAATCTCATCTGAACTCGGAAGTAAAGCAGGGTCGAGCCTGGTTAGTACTTGGATGGGAGACCGCCTGGGAATACCAGGTGCTGTAAGCT
1729	seq1	4	47571153	47571271	minus	GCTTACGGCCATACCACCCTGGAAATGCCCGATCTCATCTGAACTCGGAAGTAAAGCAGGGTCGGGCCTGGTTAGTACTTGGATGGGAGACCGCCTGGGAATACCAGGTGCTGTAAGCT
1730		4	47571330	47571448	minus	GCTTACGGCCATACCACCCTGGAAATGCCCGATCTCATCTGAACTCGGAAGTAAAGCAGGGTCGGGCCCGGTTAGTACTTGGATGGGAGACCGCCTGGGAATACCAGGTGCTGTAAGCT
1731		4	47571507	47571625	minus	GCTTACGGCCATACCACCCTGGAAATGCCCGATCTCATCTGAACTCGGAAGTAAAGCAGGGTCGAGCCTGGTTAGTACTTGGATGGGAGACCGCCTGGGAATACCAGGTGCTGTAAGCT
1732		4	47571684	47571802	minus	GCTTACGGCCATACCACCCTGGAAATGCCCGATCTCATCTGAACTCGGAAGTAAAGCAGGGTCGGCCCCGGTTAGTACTTGGATGGGAGACCGCCTGGGAATACCAGGTGCTGTAAGCT
1733	seq1	4	47571861	47571979	minus	GCTTACGGCCATACCACCCTGGAAATGCCCGATCTCATCTGAACTCGGAAGTAAAGCAGGGTCGGGCCTGGTTAGTACTTGGATGGGAGACCGCCTGGGAATACCAGGTGCTGTAAGCT
1734	seq1	4	47572038	47572156	minus	GCTTACGGCCATACCACCCTGGAAATGCCCGATCTCATCTGAACTCGGAAGTAAAGCAGGGTCGGGCCTGGTTAGTACTTGGATGGGAGACCGCCTGGGAATACCAGGTGCTGTAAGCT
1735	seq1	4	47572215	47572333	minus	GCTTACGGCCATACCACCCTGGAAATGCCCGATCTCATCTGAACTCGGAAGTAAAGCAGGGTCGGGCCTGGTTAGTACTTGGATGGGAGACCGCCTGGGAATACCAGGTGCTGTAAGCT
1736		4	47572392	47572510	minus	GCTTACGGCCATACCACCCTGGAAATGCCCGATCTCATCTGAACTCGGAAGTAAAGCAGGGTCGGGCCCGGTTAGTACTTGGATGGGAGACCGCCTGGGAATACCAGGTGCTGTAAGCT
1737	seq1	4	47572569	47572687	minus	GCTTACGGCCATACCACCCTGGAAATGCCCGATCTCATCTGAACTCGGAAGTAAAGCAGGGTCGGGCCTGGTTAGTACTTGGATGGGAGACCGCCTGGGAATACCAGGTGCTGTAAGCT
1738		4	47572746	47572864	minus	GCTTACGGCCATACCACCCTGGAAATGCCCGATCTCATCTGAACTCGGAAGTAAAGCAGGGTCGGGCCCGGTTAGTACTTGGATGGGAGACCGCCTGGGAATACCAGGTGCTGTAAGCT
1739		4	47572923	47573041	minus	GCTTACGGCCATACCACCCTGGAAATGCCCGATCTCATCAGAACTCGGAAGTAAAGCAGGATCGGGCCCGGTTAGTACTTGGATGGGAGACCGCCTGGGAATACCAGGTGCTGTAAGCT
1740	seq1	4	47573100	47573218	minus	GCTTACGGCCATACCACCCTGGAAATGCCCGATCTCATCTGAACTCGGAAGTAAAGCAGGGTCGGGCCTGGTTAGTACTTGGATGGGAGACCGCCTGGGAATACCAGGTGCTGTAAGCT
1741		4	47573277	47573395	minus	GCTTACGGCCATACCACCCTGGAAATGCCCGATCTCATCTGAACTCGGAAGTAAAGCAGGGTCGGGCCCGGTTAGTACTTGGATGGGAGACCGCCTGGGAATACCAGGTGCTGTAAGCT
1742		4	47573454	47573572	minus	GCTTACGGCCATACCACCCTGGAAATGCCCGATCTCATCTGAACTCGGAAGTAAAGCAGGGTCGGGCCCGGTTAGTACTTGGATGGGAGACCGCCTGGGAATACCAGGTGCTGTAAGCT
1743	seq43	4	47573631	47573749	minus	GCTTACGGCCATACCACCCTGGAAATGCCCGATCTCATCTGAACTCGGAAGTAAAACAGGGTCGGGCCTGGTTAGTACTTGGATGGGAGACCGCCTGGGAATACCAGGTGCTGTAAGCT
1744		4	47573808	47573927	minus	GCTTACGGCCATACCACCCTGGAAATGACCGATCTCATCTGAATTTCGGAAGTAAAGCAGGGTCGGGCCTGGTTAGTACTTGGATGGGAGACCGCCTGGGAATACCAGGTGCTGTAAGCT
1745	seq1	4	47573986	47574104	minus	GCTTACGGCCATACCACCCTGGAAATGCCCGATCTCATCTGAACTCGGAAGTAAAGCAGGGTCGGGCCTGGTTAGTACTTGGATGGGAGACCGCCTGGGAATACCAGGTGCTGTAAGCT
1746	seq1	4	47574163	47574281	minus	GCTTACGGCCATACCACCCTGGAAATGCCCGATCTCATCTGAACTCGGAAGTAAAGCAGGGTCGGGCCTGGTTAGTACTTGGATGGGAGACCGCCTGGGAATACCAGGTGCTGTAAGCT
1747	seq1	4	47574340	47574458	minus	GCTTACGGCCATACCACCCTGGAAATGCCCGATCTCATCTGAACTCGGAAGTAAAGCAGGGTCGGGCCTGGTTAGTACTTGGATGGGAGACCGCCTGGGAATACCAGGTGCTGTAAGCT
1748	seq1	4	47574517	47574635	minus	GCTTACGGCCATACCACCCTGGAAATGCCCGATCTCATCTGAACTCGGAAGTAAAGCAGGGTCGGGCCTGGTTAGTACTTGGATGGGAGACCGCCTGGGAATACCAGGTGCTGTAAGCT
1749	seq1	4	47574694	47574812	minus	GCTTACGGCCATACCACCCTGGAAATGCCCGATCTCATCTGAACTCGGAAGTAAAGCAGGGTCGGGCCTGGTTAGTACTTGGATGGGAGACCGCCTGGGAATACCAGGTGCTGTAAGCT
1750		4	47574871	47574989	minus	GCTTACGGCCATACCACCCTGGAAATGCCCGATCTCATCTGAACTCGGAAGTAAAGCAGGGTCGAGCCTGGTTAGTACTTGGATGGGAGACCGCCTGGGAATACCAGGTGCTGTAAGCT
1751		4	47575048	47575166	minus	GCTTACGGCCATACCACCCTGGAAATGCCCGATCTCATCTGAACTCGGAAGTAAAGCAGGGTCGGGCCCGGTTAGTACTTGGATGGGAGACCGCCTGGGAATACCAGGTGCTGTAAGCT
1752		4	47575225	47575343	minus	GCTTACGGCCATACCACCCTGGAAATGCCCGATCTCATCTGAACTCGGAAGTAAAGCAGGGTCGGGCCCGGTTAGTACTTGGATGGGAGACCGCCTGGGAATACCAGGTGCTGTAAGCT
1753	seq1	4	47575402	47575520	minus	GCTTACGGCCATACCACCCTGGAAATGCCCGATCTCATCTGAACTCGGAAGTAAAGCAGGGTCGGGCCTGGTTAGTACTTGGATGGGAGACCGCCTGGGAATACCAGGTGCTGTAAGCT
1754	seq1	4	47575579	47575697	minus	GCTTACGGCCATACCACCCTGGAAATGCCCGATCTCATCTGAACTCGGAAGTAAAGCAGGGTCGGGCCTGGTTAGTACTTGGATGGGAGACCGCCTGGGAATACCAGGTGCTGTAAGCT
1755	seq1	4	47581508	47581626	minus	GCTTACGGCCATACCACCCTGGAAATGCCCGATCTCATCTGAACTCGGAAGTAAAGCAGGGTCGGGCCTGGTTAGTACTTGGATGGGAGACCGCCTGGGAATACCAGGTGCTGTAAGCT
1756	seq49	4	47581685	47581803	minus	GCTTACGGCCATACCACCCTGGAAATGCCCGATCTCATCTGAACTCGGAAGTAAAGCAGGGTCGGGCCTGGTTAGTACTTGGATGGTAGACCGCCTGGGAATACCAGGTGCTGTAAGCT
1757		4	47581862	47581980	minus	GCTTACGGCCATACCACCCTGGAAATGCCCGATCTCATCTGAACTCGGAAGTAATGCAGGATCTGGCCTGGTTAGTACTTGGATGGGAGACCGCCTGGGAATACCAGGTGCTGTAAGCT
1758		4	47582039	47582157	minus	GCTTACGGCCATAACACCCTGGAAATGCCCGATCTCATCTGAACTTGGAAGTAAAGCAGGGTCGGGCCTGGTTAGTACTTGGATGGGAGACCGCCTGGGAATACCAGGTGCTGTATGCT
1759		4	47582216	47582334	minus	GCTTACGGCCATACCACCCTGGAAATGCCCGATCTCATCTGAACTCGGAAGTAAAGCAGGGTCGGGCCTGGTTAGTGCTTGGATGGGAGACCGCCTGGGAATACCAGGTGCTGTAAGCT
1760		4	47582393	47582511	minus	GCTTACGGCCATACCACCCTGGAAATACCCGATCTCATCTGAACTCGGAAGTAAAGCAGGGTCGGGCCTGGTTAGTGCTTGGATGGGAGACCGCCTGGGAATACCAGGTGCTGTAAGCT
1761	seq50	4	47582570	47582688	minus	GCTCACGGCCATACCACCCTGGAAATGCCCGATCTCATCTGAACTCGGAAGTAAAGCAGGGTCGGGCCTGGTTAGTACTTGGATGGGAGACCGCCTGGGAATACCAGGTGCTGTAAGCT
1762		4	47582747	47582864	minus	CTTACGGCCATACCACCCTGGAAATGCCCGATCTCATCTGAACTCGGAAGTAAAGCAGGGTCGGGCCTGGTTAGTACTTGGATGGGAGACCGCCTGGGAATACCAGGTGCTGTAAGCT
1763		4	47582924	47583042	minus	GCTTACGGCCATACCACCCTGGAAATGCCCGATCTCATCTGAACTCGGAAGTAATGCAGGATCTGGCCTGGTTAGTACTTGGATAGGAGACCGCCTGGGAATACCAGGTGCTGTAAGCT
1764	seq51	4	47583101	47583218	minus	CTTACGTCCATACCACCCTGGAAATGCCCGATCTCATCTGAACTCGGAAGTAAAGCAGGGTCGGGCCTGGTTAGTACTTGGATGGGAGACCGCCTGGGAATACCAGGTGCTGTAAGCT
1765		4	47588920	47589038	minus	GCTTACGGCCATACCACCCTGCAAATGCCTGCTCTCATCTGAACTCGGAAGTAAATCAGGGTCGGGCCTGGTTACTACTTGGATGGGAGACCGCCTGGGAATACCAGGTGCTGTAAGCT
1766		4	47589344	47589456	minus	AAAAAAAAAAAAATGGAAATGCCCGATCTCATCTGAACTCGGAAGTAAAGCAGGGTCGGGCCTGGTTAGTACTTGGATGGGAGACCGCCTGGGAATACCAGGTGCTGTAAGCT
1767		4	47677293	47677411	plus	GCTTACGGCCATACCACCCTGGCAATGCCCCATCTCATCTGAACTCGGAAGTAAAGCAGGGTCGGGCCTGGTTAGTACTTAGATGGGAGACCGCCTGGCAAACCCAGGTGTTGTAAGCT
1768		4	47816889	47817016	plus	TAGCCTCAGCCATATCACCCTGCAGCCCAAGACTGGTTACTCACTGAAGCTAAGCAGGGCTGAGCCTGGTTAGTACCTGGATGGGAGACCACTAGGGAAGACTAGGTTGCTGTTGGAAGTGGTGTTAG
1769		4	48163544	48163659	plus	ATAACAGCCATATCACACTGCAGCCCAAGACCGATTACTCCATGAAGCTAAGCAGGGCTGAGCCTGGCCAGTACCTGGCTGGGAGACCACATGGGAAAACTAGGTTGCTGTTGGAA
1770		4	48572099	48572217	minus	GCTTACGGCCATACCACCCTGGCAATGCCCCATCTCATCTGAACTCGGAAGTAAAGCAGGGTCGGGCCTGGTTAGTACTTAGATGGGAGACCGCCTGGCAATACCAGGTGCTGTAAGCT
1771		4	48627359	48627477	plus	GCTTACGGCCATACCACCCTGCAAATGCCCGATCTCATCTGAACTCAGAAGTAAAGCAGGGTTGGGCCTGGTTAGTACTTGGATGGGAGACCGCCTGGGAATACCAGGTGCTGTAAGCT
1772		4	49350929	49351044	plus	AACAGCCATATCACCCTGCAGCCCAAGACAGGTTACTCCCTGAAGCTAAGCAAGGCTGAGCCTGGCCAGTGCCTGGCTGTGAGACCACATGGGAAAACGAGGTTGCTGTTAGAAGT
1773	seq52	4	50030231	50030349	minus	GCTTACGGCCATACCACCCTGGAAATGCCCGATCTCATCTGAACTCGGACGTAAAGCAGGGTCGGGCCTGGTTAGTACTTGGATGGGAGACCGCCTGGGAATACCAGGTGCTGTAAGCT
1774		4	50030530	50030648	minus	GCTTACGGCCATACCACCCTGGAAATGCCCGATCTCATCTGAACTGGGAAGTAAAGCAGGGTCGGGCCTGGTTAGTACTTGGATGGGAGACTGCCTGGGAATACCAGGTGCTGTAAGCT
1775	seq19	4	50030829	50030947	minus	GCTTACGGCCATACCACCCTGGAAATACCCGATCTCATCTGAACTCGGAAGTAAAGCAGGGTCGGGCCTGGTTAGTACTTGGATGGGAGACCGCCTGGGAATACCAGGTGCTGTAAGCT
1776	seq1	4	50031127	50031245	minus	GCTTACGGCCATACCACCCTGGAAATGCCCGATCTCATCTGAACTCGGAAGTAAAGCAGGGTCGGGCCTGGTTAGTACTTGGATGGGAGACCGCCTGGGAATACCAGGTGCTGTAAGCT
1777		4	50031425	50031543	minus	GCTTACGGCCATACCACCCTGGAAATGCCCGATCTCATCTCAACTCGGAAGTAAAGCAGGGTCGGGCCTGGTTAGTACTTGGATGGGAGACTGCCTGGGAATACCAGGTGCTGTAAGCT
1778		4	50082157	50082278	plus	TCATTTAGCCGGCAGCTAGCTCTCTGCAACTCTCACATGGTCACTCACTGAAGCTGAGCAAGGCTGCGCCCGGTCTGTACCTAGATGGTAGACCACATGGGAAAGCTGGGTTGCTGCTGGAA
1779		4	50342657	50342775	plus	ACTTACGGCCATACCACCCTGGAAATGTCTGATCTCATCTGAACTCGGAAGTAAAGCAGGGTCGGGCCTGGTTAGTACTTGGATGGGAGACCGCCTGGCAATACCAGGTGCTGTAAGCT
1780		4	50399716	50399831	minus	ATTAAAAAATTAAAAAAAGAAATGCCCGATCTCATCTGAACTCGGAAGTAAAGCAGGGTCGGGCATGGTTAGTACTTGGATGGGAGACCGCCTGGGAATACCAGGTGCTGTAAGCT
1781		4	50516214	50516322	plus	AGCTGGCAGCTAGCTCTCTGCAACTCTCACATGGCTGCCCACTGAAGCTAAGCAGGGTCAGTACCTGGATGGGAGACCACATGGGAAAGCTAGGTTGCTGCTGGAAGTG
1782		4	51173348	51173467	plus	GCTCAGCATGTCACCCTGCAGCCCAAGACCGGTTACTCACTGAAGCTAAGCAGGGCTGAGCCTGGTCAGTACCTGGATGGGAGACCACTAGGGAACACTAGGTTGCTGTTGTTAGTGAGG
1783		4	51219022	51219136	minus	TAACAGCCATGTCACCCTCAAGCCCAAAAGCGGTTACTTCCTGGAGCTAAGCAGGGCTGAGCCTGGCCAGTACCTGGCTGGGAGACCACATGGGAAAACTAGGTTGCTGTTGGAA
1784		4	51299287	51299404	minus	AGCTGGCAGCTAGCTCTCTGCAACTCTCACATGGCCGCCCACTGAAGCTAAACAGGGCTGTGCCCGGTCAGTACCTAAATGGGAGACCACATGGGAAAGCTAGGTTGCTGCCGGAAGT
1785	seq1	4	51477974	51478092	minus	GCTTACGGCCATACCACCCTGGAAATGCCCGATCTCATCTGAACTCGGAAGTAAAGCAGGGTCGGGCCTGGTTAGTACTTGGATGGGAGACCGCCTGGGAATACCAGGTGCTGTAAGCT
1786	seq1	4	51478151	51478269	minus	GCTTACGGCCATACCACCCTGGAAATGCCCGATCTCATCTGAACTCGGAAGTAAAGCAGGGTCGGGCCTGGTTAGTACTTGGATGGGAGACCGCCTGGGAATACCAGGTGCTGTAAGCT
1787	seq1	4	51478328	51478446	minus	GCTTACGGCCATACCACCCTGGAAATGCCCGATCTCATCTGAACTCGGAAGTAAAGCAGGGTCGGGCCTGGTTAGTACTTGGATGGGAGACCGCCTGGGAATACCAGGTGCTGTAAGCT
1788	seq1	4	51478505	51478623	minus	GCTTACGGCCATACCACCCTGGAAATGCCCGATCTCATCTGAACTCGGAAGTAAAGCAGGGTCGGGCCTGGTTAGTACTTGGATGGGAGACCGCCTGGGAATACCAGGTGCTGTAAGCT
1789	seq1	4	51478682	51478800	minus	GCTTACGGCCATACCACCCTGGAAATGCCCGATCTCATCTGAACTCGGAAGTAAAGCAGGGTCGGGCCTGGTTAGTACTTGGATGGGAGACCGCCTGGGAATACCAGGTGCTGTAAGCT
1790		4	51478859	51478976	minus	CTTACGGCCATACCACCCTGGAAATGCCCGATCTCATCTGAACTCGGAAGTAAAGCAGGGTCGGGCCTGGTTAGTACTTGGATGGGAGACCGCCTGGGAATACCAGGTGCTGTAAGCT
1791	seq1	4	51479036	51479154	minus	GCTTACGGCCATACCACCCTGGAAATGCCCGATCTCATCTGAACTCGGAAGTAAAGCAGGGTCGGGCCTGGTTAGTACTTGGATGGGAGACCGCCTGGGAATACCAGGTGCTGTAAGCT
1792		4	51479213	51479331	minus	GCTTACGGCCATACCACCCTGGAAATGCCCGATCTCATCTGAACTCGGAAGTAAAGCAGGGTCGGGCCTGGTTAGTACTCGGATGGGAGACCGCCTGGGAATACCAGGTGCTGTAAGCT
1793	seq1	4	51479390	51479508	minus	GCTTACGGCCATACCACCCTGGAAATGCCCGATCTCATCTGAACTCGGAAGTAAAGCAGGGTCGGGCCTGGTTAGTACTTGGATGGGAGACCGCCTGGGAATACCAGGTGCTGTAAGCT
1794		4	51479567	51479684	minus	CTTACGGCCATACCACCCTGGAAATGCCCGATCTCATCTGAACTCGGAAGTAAAGCAGGGTCGGGCCTGGTTAGTACTTGGATGGGAGACCGCCTGGGAATACCAGGTGCTGTAAGCT
1795	seq54	4	51479744	51479861	minus	GCTTACGCCATACCACCCTGGAAATGCCCGATCTCATCTGAACTCGGAAGTAAAGCAGGGTCGGGCCTGGTTAGTACTTGGATGGGAGACCGCCTGGGAATACCAGGTGCTGTAAGCT
1796	seq1	4	51479920	51480038	minus	GCTTACGGCCATACCACCCTGGAAATGCCCGATCTCATCTGAACTCGGAAGTAAAGCAGGGTCGGGCCTGGTTAGTACTTGGATGGGAGACCGCCTGGGAATACCAGGTGCTGTAAGCT
1797	seq1	4	51480097	51480215	minus	GCTTACGGCCATACCACCCTGGAAATGCCCGATCTCATCTGAACTCGGAAGTAAAGCAGGGTCGGGCCTGGTTAGTACTTGGATGGGAGACCGCCTGGGAATACCAGGTGCTGTAAGCT
1798	seq54	4	51480274	51480391	minus	GCTTACGCCATACCACCCTGGAAATGCCCGATCTCATCTGAACTCGGAAGTAAAGCAGGGTCGGGCCTGGTTAGTACTTGGATGGGAGACCGCCTGGGAATACCAGGTGCTGTAAGCT
1799		4	51480450	51480568	minus	GCTTACGGCCATACCACCCTGGAAATGCCCGATCTCATCTGAACTCGGAAGTAAAGCAGGGTCGGGCCTGGTTAGTACGTGGATGGGAGACCGCCTGGGAATACCAGGTGCTGTAAGCT
1800	seq1	4	51480627	51480745	minus	GCTTACGGCCATACCACCCTGGAAATGCCCGATCTCATCTGAACTCGGAAGTAAAGCAGGGTCGGGCCTGGTTAGTACTTGGATGGGAGACCGCCTGGGAATACCAGGTGCTGTAAGCT
1801	seq1	4	51480804	51480922	minus	GCTTACGGCCATACCACCCTGGAAATGCCCGATCTCATCTGAACTCGGAAGTAAAGCAGGGTCGGGCCTGGTTAGTACTTGGATGGGAGACCGCCTGGGAATACCAGGTGCTGTAAGCT
1802	seq1	4	51480981	51481099	minus	GCTTACGGCCATACCACCCTGGAAATGCCCGATCTCATCTGAACTCGGAAGTAAAGCAGGGTCGGGCCTGGTTAGTACTTGGATGGGAGACCGCCTGGGAATACCAGGTGCTGTAAGCT
1803		4	51481158	51481275	minus	CTTACGGCCATACCACCCTGGAAATGCCCGATCTCATCTGAACTCGGAAGTAAAGCAGGGTCGGGCCTGGTTAGTACTTGGATGGGAGACCGCCTGGGAATACCAGGTGCTGTAAGCT
1804	seq1	4	51481335	51481453	minus	GCTTACGGCCATACCACCCTGGAAATGCCCGATCTCATCTGAACTCGGAAGTAAAGCAGGGTCGGGCCTGGTTAGTACTTGGATGGGAGACCGCCTGGGAATACCAGGTGCTGTAAGCT
1805	seq1	4	51481512	51481630	minus	GCTTACGGCCATACCACCCTGGAAATGCCCGATCTCATCTGAACTCGGAAGTAAAGCAGGGTCGGGCCTGGTTAGTACTTGGATGGGAGACCGCCTGGGAATACCAGGTGCTGTAAGCT
1806	seq1	4	51481689	51481807	minus	GCTTACGGCCATACCACCCTGGAAATGCCCGATCTCATCTGAACTCGGAAGTAAAGCAGGGTCGGGCCTGGTTAGTACTTGGATGGGAGACCGCCTGGGAATACCAGGTGCTGTAAGCT
1807	seq1	4	51481866	51481984	minus	GCTTACGGCCATACCACCCTGGAAATGCCCGATCTCATCTGAACTCGGAAGTAAAGCAGGGTCGGGCCTGGTTAGTACTTGGATGGGAGACCGCCTGGGAATACCAGGTGCTGTAAGCT
1808	seq1	4	51482043	51482161	minus	GCTTACGGCCATACCACCCTGGAAATGCCCGATCTCATCTGAACTCGGAAGTAAAGCAGGGTCGGGCCTGGTTAGTACTTGGATGGGAGACCGCCTGGGAATACCAGGTGCTGTAAGCT
1809	seq1	4	51482220	51482338	minus	GCTTACGGCCATACCACCCTGGAAATGCCCGATCTCATCTGAACTCGGAAGTAAAGCAGGGTCGGGCCTGGTTAGTACTTGGATGGGAGACCGCCTGGGAATACCAGGTGCTGTAAGCT
1810	seq1	4	51482397	51482515	minus	GCTTACGGCCATACCACCCTGGAAATGCCCGATCTCATCTGAACTCGGAAGTAAAGCAGGGTCGGGCCTGGTTAGTACTTGGATGGGAGACCGCCTGGGAATACCAGGTGCTGTAAGCT
1811	seq1	4	51482574	51482692	minus	GCTTACGGCCATACCACCCTGGAAATGCCCGATCTCATCTGAACTCGGAAGTAAAGCAGGGTCGGGCCTGGTTAGTACTTGGATGGGAGACCGCCTGGGAATACCAGGTGCTGTAAGCT
1812	seq1	4	51482751	51482869	minus	GCTTACGGCCATACCACCCTGGAAATGCCCGATCTCATCTGAACTCGGAAGTAAAGCAGGGTCGGGCCTGGTTAGTACTTGGATGGGAGACCGCCTGGGAATACCAGGTGCTGTAAGCT
1813	seq1	4	51482928	51483046	minus	GCTTACGGCCATACCACCCTGGAAATGCCCGATCTCATCTGAACTCGGAAGTAAAGCAGGGTCGGGCCTGGTTAGTACTTGGATGGGAGACCGCCTGGGAATACCAGGTGCTGTAAGCT
1814	seq1	4	51483105	51483223	minus	GCTTACGGCCATACCACCCTGGAAATGCCCGATCTCATCTGAACTCGGAAGTAAAGCAGGGTCGGGCCTGGTTAGTACTTGGATGGGAGACCGCCTGGGAATACCAGGTGCTGTAAGCT
1815		4	51483282	51483400	minus	GCTTACGGCCATACCACCCTGGAAATGCCCGATCTCATCTGAACTCGGAAGTAAAGCAGGGACGGGCCTGGTTAGTACTTGAATGGGAGACCGCCTGGGAATACCAGGTGCTGTAAGCT
1816	seq35	4	51483459	51483577	minus	GCTTACGGCCATACCACCCTGGAACTGCCCGATCTCATCTGAACTCGGAAGTAAAGCAGGGTCGGGCCTGGTTAGTACTTGGATGGGAGACCGCCTGGGAATACCAGGTGCTGTAAGCT
1817	seq1	4	51483636	51483754	minus	GCTTACGGCCATACCACCCTGGAAATGCCCGATCTCATCTGAACTCGGAAGTAAAGCAGGGTCGGGCCTGGTTAGTACTTGGATGGGAGACCGCCTGGGAATACCAGGTGCTGTAAGCT
1818	seq1	4	51483813	51483931	minus	GCTTACGGCCATACCACCCTGGAAATGCCCGATCTCATCTGAACTCGGAAGTAAAGCAGGGTCGGGCCTGGTTAGTACTTGGATGGGAGACCGCCTGGGAATACCAGGTGCTGTAAGCT
1819		4	51483990	51484108	minus	GCTTACGGCCATACCACCCTGGAAATACCCGATCTCATCTGAACTCGGAAGTAATGCAGGGTCGGGCCTGGTTAGTACTTGAATGGGAGACCGCCTGGGAATACCAGGTGCTGTAAGCT
1820	seq1	4	51484167	51484285	minus	GCTTACGGCCATACCACCCTGGAAATGCCCGATCTCATCTGAACTCGGAAGTAAAGCAGGGTCGGGCCTGGTTAGTACTTGGATGGGAGACCGCCTGGGAATACCAGGTGCTGTAAGCT
1821	seq1	4	51484344	51484462	minus	GCTTACGGCCATACCACCCTGGAAATGCCCGATCTCATCTGAACTCGGAAGTAAAGCAGGGTCGGGCCTGGTTAGTACTTGGATGGGAGACCGCCTGGGAATACCAGGTGCTGTAAGCT
1822		4	51484521	51484638	minus	CTTACGGCCATACCACCCTGGAAATGCCCGATCTCATCTGAACTCGGAAGTAAAGCAGGGTCGGGCCTGGTTAGTACTTGGATGGGAGACCGCCTGGGAATACCAGGTGCTGTAAGCT
1823	seq1	4	51484698	51484816	minus	GCTTACGGCCATACCACCCTGGAAATGCCCGATCTCATCTGAACTCGGAAGTAAAGCAGGGTCGGGCCTGGTTAGTACTTGGATGGGAGACCGCCTGGGAATACCAGGTGCTGTAAGCT
1824	seq1	4	51484875	51484993	minus	GCTTACGGCCATACCACCCTGGAAATGCCCGATCTCATCTGAACTCGGAAGTAAAGCAGGGTCGGGCCTGGTTAGTACTTGGATGGGAGACCGCCTGGGAATACCAGGTGCTGTAAGCT
1825	seq1	4	51485052	51485170	minus	GCTTACGGCCATACCACCCTGGAAATGCCCGATCTCATCTGAACTCGGAAGTAAAGCAGGGTCGGGCCTGGTTAGTACTTGGATGGGAGACCGCCTGGGAATACCAGGTGCTGTAAGCT
1826	seq1	4	51485229	51485347	minus	GCTTACGGCCATACCACCCTGGAAATGCCCGATCTCATCTGAACTCGGAAGTAAAGCAGGGTCGGGCCTGGTTAGTACTTGGATGGGAGACCGCCTGGGAATACCAGGTGCTGTAAGCT
1827	seq1	4	51485406	51485524	minus	GCTTACGGCCATACCACCCTGGAAATGCCCGATCTCATCTGAACTCGGAAGTAAAGCAGGGTCGGGCCTGGTTAGTACTTGGATGGGAGACCGCCTGGGAATACCAGGTGCTGTAAGCT
1828		4	51485583	51485701	minus	GCTTACGGCCATAGCACCCTGGAAATGCCCGATCTCATCTGAACTCGGAAGTAAAGCAGGGTGGGGCCTGGTTAGTACTCGGATGGGAGACCGCCTGGGAATACCAGGTGCTGTAAGCT
1829	seq1	4	51485760	51485878	minus	GCTTACGGCCATACCACCCTGGAAATGCCCGATCTCATCTGAACTCGGAAGTAAAGCAGGGTCGGGCCTGGTTAGTACTTGGATGGGAGACCGCCTGGGAATACCAGGTGCTGTAAGCT
1830	seq1	4	51485937	51486055	minus	GCTTACGGCCATACCACCCTGGAAATGCCCGATCTCATCTGAACTCGGAAGTAAAGCAGGGTCGGGCCTGGTTAGTACTTGGATGGGAGACCGCCTGGGAATACCAGGTGCTGTAAGCT
1831		4	51486114	51486232	minus	GCTTACGGCCATACCACCCTGGAAATGTCCGATCTCATCTGAACTCGGAAGTAAAGCAGGGTCGGGCCTGGTTAGTACTTGGAAGGGAGACCGCCTGGGAATACCAGGTGCTGAAAGCT
1832	seq33	4	51486291	51486409	minus	GCTTACGGCCATACCACCCTGGAAATGCCCGATCTCATCTGAACTCGGAAGTAAAGCAGGGTCGGGCCTGGTTAGTACTTGGATGGGAGACCGCCTGGGAATACCAGGTGCTGAAAGCT
1833	seq1	4	51486468	51486586	minus	GCTTACGGCCATACCACCCTGGAAATGCCCGATCTCATCTGAACTCGGAAGTAAAGCAGGGTCGGGCCTGGTTAGTACTTGGATGGGAGACCGCCTGGGAATACCAGGTGCTGTAAGCT
1834	seq29	4	51486645	51486763	minus	GCTTACGGCCATACCACCCTGGAAATGCCCGATCTCATCTGAACTTGGAAGTAAAGCAGGGTCGGGCCTGGTTAGTACTTGGATGGGAGACCGCCTGGGAATACCAGGTGCTGTAAGCT
1835	seq1	4	51486822	51486940	minus	GCTTACGGCCATACCACCCTGGAAATGCCCGATCTCATCTGAACTCGGAAGTAAAGCAGGGTCGGGCCTGGTTAGTACTTGGATGGGAGACCGCCTGGGAATACCAGGTGCTGTAAGCT
1836	seq1	4	51486999	51487117	minus	GCTTACGGCCATACCACCCTGGAAATGCCCGATCTCATCTGAACTCGGAAGTAAAGCAGGGTCGGGCCTGGTTAGTACTTGGATGGGAGACCGCCTGGGAATACCAGGTGCTGTAAGCT
1837	seq1	4	51487176	51487294	minus	GCTTACGGCCATACCACCCTGGAAATGCCCGATCTCATCTGAACTCGGAAGTAAAGCAGGGTCGGGCCTGGTTAGTACTTGGATGGGAGACCGCCTGGGAATACCAGGTGCTGTAAGCT
1838	seq1	4	51487353	51487471	minus	GCTTACGGCCATACCACCCTGGAAATGCCCGATCTCATCTGAACTCGGAAGTAAAGCAGGGTCGGGCCTGGTTAGTACTTGGATGGGAGACCGCCTGGGAATACCAGGTGCTGTAAGCT
1839	seq1	4	51487530	51487648	minus	GCTTACGGCCATACCACCCTGGAAATGCCCGATCTCATCTGAACTCGGAAGTAAAGCAGGGTCGGGCCTGGTTAGTACTTGGATGGGAGACCGCCTGGGAATACCAGGTGCTGTAAGCT
1840	seq1	4	51487707	51487825	minus	GCTTACGGCCATACCACCCTGGAAATGCCCGATCTCATCTGAACTCGGAAGTAAAGCAGGGTCGGGCCTGGTTAGTACTTGGATGGGAGACCGCCTGGGAATACCAGGTGCTGTAAGCT
1841	seq55	4	51487884	51488002	minus	GCTTACGGCCATACCACCCTTGAAATGCCCGATCTCATCTGAACTCGGAAGTAAAGCAGGGTCGGGCCTGGTTAGTACTTGGATGGGAGACCGCCTGGGAATACCAGGTGCTGTAAGCT
1842	seq1	4	51488061	51488179	minus	GCTTACGGCCATACCACCCTGGAAATGCCCGATCTCATCTGAACTCGGAAGTAAAGCAGGGTCGGGCCTGGTTAGTACTTGGATGGGAGACCGCCTGGGAATACCAGGTGCTGTAAGCT
1843	seq1	4	51488238	51488356	minus	GCTTACGGCCATACCACCCTGGAAATGCCCGATCTCATCTGAACTCGGAAGTAAAGCAGGGTCGGGCCTGGTTAGTACTTGGATGGGAGACCGCCTGGGAATACCAGGTGCTGTAAGCT
1844	seq1	4	51488415	51488533	minus	GCTTACGGCCATACCACCCTGGAAATGCCCGATCTCATCTGAACTCGGAAGTAAAGCAGGGTCGGGCCTGGTTAGTACTTGGATGGGAGACCGCCTGGGAATACCAGGTGCTGTAAGCT
1845		4	51488592	51488706	minus	TACGCCATACCACCCTGGAAATGCCCGATCTCATCTGAACTCGGAAGTAAAGCAGGGTCGGGCCTGGTTAGTACTTGGATGGGAGACCGCCTGGGAATACCAGGTGCTGTAAGCT
1846	seq57	4	51488763	51488881	minus	GCTTACGGCCATACCACCCTGGAAATGCCCGATCTCATCTGAACTCGGAAGTAAAGCAGGGTCCGGCCTGGTTAGTACTTGGATGGGAGACCGCCTGGGAATACCAGGTGCTGTAAGCT
1847		4	51488940	51489058	minus	GCTTACGGCCATACCACCCTGGAAATGCCCGATCTCATCTGAACTCGGAAGTAAAGCAGGGTGGGGCCTGGTTAGTACTTGGATGGGAGACCGCCTGGGAATACCAGGTGCTGTAAGCT
1848	seq1	4	51489117	51489235	minus	GCTTACGGCCATACCACCCTGGAAATGCCCGATCTCATCTGAACTCGGAAGTAAAGCAGGGTCGGGCCTGGTTAGTACTTGGATGGGAGACCGCCTGGGAATACCAGGTGCTGTAAGCT
1849	seq1	4	51489294	51489412	minus	GCTTACGGCCATACCACCCTGGAAATGCCCGATCTCATCTGAACTCGGAAGTAAAGCAGGGTCGGGCCTGGTTAGTACTTGGATGGGAGACCGCCTGGGAATACCAGGTGCTGTAAGCT
1850		4	51489471	51489589	minus	GCTTACGGCCATACCACCCTGGAAATGCCCGATCTCATCTGAACTCGGAAGTAAAGCAGGGTCGGGCCTGGTTAGTACTTGGAAGGGAGACCGCCTGGGAATACCAGGTGCTGTAAGCT
1851	seq1	4	51489648	51489766	minus	GCTTACGGCCATACCACCCTGGAAATGCCCGATCTCATCTGAACTCGGAAGTAAAGCAGGGTCGGGCCTGGTTAGTACTTGGATGGGAGACCGCCTGGGAATACCAGGTGCTGTAAGCT
1852	seq1	4	51489825	51489943	minus	GCTTACGGCCATACCACCCTGGAAATGCCCGATCTCATCTGAACTCGGAAGTAAAGCAGGGTCGGGCCTGGTTAGTACTTGGATGGGAGACCGCCTGGGAATACCAGGTGCTGTAAGCT
1853	seq1	4	51490001	51490119	minus	GCTTACGGCCATACCACCCTGGAAATGCCCGATCTCATCTGAACTCGGAAGTAAAGCAGGGTCGGGCCTGGTTAGTACTTGGATGGGAGACCGCCTGGGAATACCAGGTGCTGTAAGCT
1854	seq1	4	51490178	51490296	minus	GCTTACGGCCATACCACCCTGGAAATGCCCGATCTCATCTGAACTCGGAAGTAAAGCAGGGTCGGGCCTGGTTAGTACTTGGATGGGAGACCGCCTGGGAATACCAGGTGCTGTAAGCT
1855	seq1	4	51490355	51490473	minus	GCTTACGGCCATACCACCCTGGAAATGCCCGATCTCATCTGAACTCGGAAGTAAAGCAGGGTCGGGCCTGGTTAGTACTTGGATGGGAGACCGCCTGGGAATACCAGGTGCTGTAAGCT
1856	seq1	4	51490532	51490650	minus	GCTTACGGCCATACCACCCTGGAAATGCCCGATCTCATCTGAACTCGGAAGTAAAGCAGGGTCGGGCCTGGTTAGTACTTGGATGGGAGACCGCCTGGGAATACCAGGTGCTGTAAGCT
1857	seq1	4	51490709	51490827	minus	GCTTACGGCCATACCACCCTGGAAATGCCCGATCTCATCTGAACTCGGAAGTAAAGCAGGGTCGGGCCTGGTTAGTACTTGGATGGGAGACCGCCTGGGAATACCAGGTGCTGTAAGCT
1858	seq1	4	51490886	51491004	minus	GCTTACGGCCATACCACCCTGGAAATGCCCGATCTCATCTGAACTCGGAAGTAAAGCAGGGTCGGGCCTGGTTAGTACTTGGATGGGAGACCGCCTGGGAATACCAGGTGCTGTAAGCT
1859	seq1	4	51491063	51491181	minus	GCTTACGGCCATACCACCCTGGAAATGCCCGATCTCATCTGAACTCGGAAGTAAAGCAGGGTCGGGCCTGGTTAGTACTTGGATGGGAGACCGCCTGGGAATACCAGGTGCTGTAAGCT
1860	seq1	4	51491240	51491358	minus	GCTTACGGCCATACCACCCTGGAAATGCCCGATCTCATCTGAACTCGGAAGTAAAGCAGGGTCGGGCCTGGTTAGTACTTGGATGGGAGACCGCCTGGGAATACCAGGTGCTGTAAGCT
1861	seq1	4	51491417	51491535	minus	GCTTACGGCCATACCACCCTGGAAATGCCCGATCTCATCTGAACTCGGAAGTAAAGCAGGGTCGGGCCTGGTTAGTACTTGGATGGGAGACCGCCTGGGAATACCAGGTGCTGTAAGCT
1862	seq1	4	51491594	51491712	minus	GCTTACGGCCATACCACCCTGGAAATGCCCGATCTCATCTGAACTCGGAAGTAAAGCAGGGTCGGGCCTGGTTAGTACTTGGATGGGAGACCGCCTGGGAATACCAGGTGCTGTAAGCT
1863		4	51491771	51491888	minus	GCTTACGGCCATACCACCCTGGAAATGCCCGATCTCATCTGAACTCGGAAGTAAAGCAGGGTCGGGCCTGGTAGTACTTGGATGGGAGACCGCCTGGGAATACCAGGTGCTGTAAGCT
1864	seq1	4	51491947	51492065	minus	GCTTACGGCCATACCACCCTGGAAATGCCCGATCTCATCTGAACTCGGAAGTAAAGCAGGGTCGGGCCTGGTTAGTACTTGGATGGGAGACCGCCTGGGAATACCAGGTGCTGTAAGCT
1865	seq1	4	51492124	51492242	minus	GCTTACGGCCATACCACCCTGGAAATGCCCGATCTCATCTGAACTCGGAAGTAAAGCAGGGTCGGGCCTGGTTAGTACTTGGATGGGAGACCGCCTGGGAATACCAGGTGCTGTAAGCT
1866	seq1	4	51492301	51492419	minus	GCTTACGGCCATACCACCCTGGAAATGCCCGATCTCATCTGAACTCGGAAGTAAAGCAGGGTCGGGCCTGGTTAGTACTTGGATGGGAGACCGCCTGGGAATACCAGGTGCTGTAAGCT
1867	seq1	4	51492478	51492596	minus	GCTTACGGCCATACCACCCTGGAAATGCCCGATCTCATCTGAACTCGGAAGTAAAGCAGGGTCGGGCCTGGTTAGTACTTGGATGGGAGACCGCCTGGGAATACCAGGTGCTGTAAGCT
1868	seq1	4	51492655	51492773	minus	GCTTACGGCCATACCACCCTGGAAATGCCCGATCTCATCTGAACTCGGAAGTAAAGCAGGGTCGGGCCTGGTTAGTACTTGGATGGGAGACCGCCTGGGAATACCAGGTGCTGTAAGCT
1869	seq1	4	51492832	51492950	minus	GCTTACGGCCATACCACCCTGGAAATGCCCGATCTCATCTGAACTCGGAAGTAAAGCAGGGTCGGGCCTGGTTAGTACTTGGATGGGAGACCGCCTGGGAATACCAGGTGCTGTAAGCT
1870	seq1	4	51493009	51493127	minus	GCTTACGGCCATACCACCCTGGAAATGCCCGATCTCATCTGAACTCGGAAGTAAAGCAGGGTCGGGCCTGGTTAGTACTTGGATGGGAGACCGCCTGGGAATACCAGGTGCTGTAAGCT
1871	seq1	4	51493186	51493304	minus	GCTTACGGCCATACCACCCTGGAAATGCCCGATCTCATCTGAACTCGGAAGTAAAGCAGGGTCGGGCCTGGTTAGTACTTGGATGGGAGACCGCCTGGGAATACCAGGTGCTGTAAGCT
1872	seq1	4	51493363	51493481	minus	GCTTACGGCCATACCACCCTGGAAATGCCCGATCTCATCTGAACTCGGAAGTAAAGCAGGGTCGGGCCTGGTTAGTACTTGGATGGGAGACCGCCTGGGAATACCAGGTGCTGTAAGCT
1873	seq1	4	51493540	51493658	minus	GCTTACGGCCATACCACCCTGGAAATGCCCGATCTCATCTGAACTCGGAAGTAAAGCAGGGTCGGGCCTGGTTAGTACTTGGATGGGAGACCGCCTGGGAATACCAGGTGCTGTAAGCT
1874	seq1	4	51493717	51493835	minus	GCTTACGGCCATACCACCCTGGAAATGCCCGATCTCATCTGAACTCGGAAGTAAAGCAGGGTCGGGCCTGGTTAGTACTTGGATGGGAGACCGCCTGGGAATACCAGGTGCTGTAAGCT
1875	seq1	4	51493894	51494012	minus	GCTTACGGCCATACCACCCTGGAAATGCCCGATCTCATCTGAACTCGGAAGTAAAGCAGGGTCGGGCCTGGTTAGTACTTGGATGGGAGACCGCCTGGGAATACCAGGTGCTGTAAGCT
1876	seq1	4	51494071	51494189	minus	GCTTACGGCCATACCACCCTGGAAATGCCCGATCTCATCTGAACTCGGAAGTAAAGCAGGGTCGGGCCTGGTTAGTACTTGGATGGGAGACCGCCTGGGAATACCAGGTGCTGTAAGCT
1877	seq1	4	51494248	51494366	minus	GCTTACGGCCATACCACCCTGGAAATGCCCGATCTCATCTGAACTCGGAAGTAAAGCAGGGTCGGGCCTGGTTAGTACTTGGATGGGAGACCGCCTGGGAATACCAGGTGCTGTAAGCT
1878	seq1	4	51494425	51494543	minus	GCTTACGGCCATACCACCCTGGAAATGCCCGATCTCATCTGAACTCGGAAGTAAAGCAGGGTCGGGCCTGGTTAGTACTTGGATGGGAGACCGCCTGGGAATACCAGGTGCTGTAAGCT
1879	seq1	4	51494602	51494720	minus	GCTTACGGCCATACCACCCTGGAAATGCCCGATCTCATCTGAACTCGGAAGTAAAGCAGGGTCGGGCCTGGTTAGTACTTGGATGGGAGACCGCCTGGGAATACCAGGTGCTGTAAGCT
1880	seq1	4	51494779	51494897	minus	GCTTACGGCCATACCACCCTGGAAATGCCCGATCTCATCTGAACTCGGAAGTAAAGCAGGGTCGGGCCTGGTTAGTACTTGGATGGGAGACCGCCTGGGAATACCAGGTGCTGTAAGCT
1881		4	51494956	51495074	minus	GCTTACGGCCATACCACCCTGGAAATGCCCGATCTCATCTGAACTCGGAAGTAAAGCAGGGACGGGCCTGGTTAGTACTTGAATGGGAGACCGCCTGGGAATACCAGGTGCTGTAAGCT
1882		4	51495133	51495252	minus	GCTTACGGCCATACCACCCTGGAAATGCCCGATCTCATCTGAACTCGGAAGTAAAGCAGGGTCGGGCCTGGTTAGTACTTGGATGGGAGACCGTCCTGGGAATACCAGGTGCTGTAAGCT
1883	seq1	4	51495311	51495429	minus	GCTTACGGCCATACCACCCTGGAAATGCCCGATCTCATCTGAACTCGGAAGTAAAGCAGGGTCGGGCCTGGTTAGTACTTGGATGGGAGACCGCCTGGGAATACCAGGTGCTGTAAGCT
1884	seq1	4	51495488	51495606	minus	GCTTACGGCCATACCACCCTGGAAATGCCCGATCTCATCTGAACTCGGAAGTAAAGCAGGGTCGGGCCTGGTTAGTACTTGGATGGGAGACCGCCTGGGAATACCAGGTGCTGTAAGCT
1885	seq1	4	51495665	51495783	minus	GCTTACGGCCATACCACCCTGGAAATGCCCGATCTCATCTGAACTCGGAAGTAAAGCAGGGTCGGGCCTGGTTAGTACTTGGATGGGAGACCGCCTGGGAATACCAGGTGCTGTAAGCT
1886	seq1	4	51495842	51495960	minus	GCTTACGGCCATACCACCCTGGAAATGCCCGATCTCATCTGAACTCGGAAGTAAAGCAGGGTCGGGCCTGGTTAGTACTTGGATGGGAGACCGCCTGGGAATACCAGGTGCTGTAAGCT
1887	seq1	4	51496019	51496137	minus	GCTTACGGCCATACCACCCTGGAAATGCCCGATCTCATCTGAACTCGGAAGTAAAGCAGGGTCGGGCCTGGTTAGTACTTGGATGGGAGACCGCCTGGGAATACCAGGTGCTGTAAGCT
1888		4	51501951	51502068	minus	CTTACGGCCATACCACCCTGGAAATGCCCGATCTCATCTGAACTCGGAAGTAAAGCAGGGTCGGGCCTGGTTAGTACTTGGATGGGAGACCGCCTGGGAATACCAGGTGCTGTAAGCT
1889		4	51502128	51502245	minus	CTTACGGCCATACCACCCTGGAAATGCCCGATCTCATCTGAACTCGGAAGTAAAGCAGGGTCGGGCCTGGTTAGTACTTGGATGGGAGACCGCCTGGGAATACCAGGTGCTGTAAGCT
1890		4	51502305	51502417	minus	AAAAAAAAAAAAATGGAAATGCCCGATCTCATCTGAACTCGGAAGTAAAGCAGGGTCGGGCCTGGTTAGTACTTGGATGGGAGACCGCCTGGGAATACCAGGTGCTGTAAGCT
1891	seq1	4	51508058	51508176	minus	GCTTACGGCCATACCACCCTGGAAATGCCCGATCTCATCTGAACTCGGAAGTAAAGCAGGGTCGGGCCTGGTTAGTACTTGGATGGGAGACCGCCTGGGAATACCAGGTGCTGTAAGCT
1892	seq1	4	51508235	51508353	minus	GCTTACGGCCATACCACCCTGGAAATGCCCGATCTCATCTGAACTCGGAAGTAAAGCAGGGTCGGGCCTGGTTAGTACTTGGATGGGAGACCGCCTGGGAATACCAGGTGCTGTAAGCT
1893	seq1	4	51508412	51508530	minus	GCTTACGGCCATACCACCCTGGAAATGCCCGATCTCATCTGAACTCGGAAGTAAAGCAGGGTCGGGCCTGGTTAGTACTTGGATGGGAGACCGCCTGGGAATACCAGGTGCTGTAAGCT
1894	seq1	4	51508589	51508707	minus	GCTTACGGCCATACCACCCTGGAAATGCCCGATCTCATCTGAACTCGGAAGTAAAGCAGGGTCGGGCCTGGTTAGTACTTGGATGGGAGACCGCCTGGGAATACCAGGTGCTGTAAGCT
1895	seq1	4	51508766	51508884	minus	GCTTACGGCCATACCACCCTGGAAATGCCCGATCTCATCTGAACTCGGAAGTAAAGCAGGGTCGGGCCTGGTTAGTACTTGGATGGGAGACCGCCTGGGAATACCAGGTGCTGTAAGCT
1896	seq1	4	51508943	51509061	minus	GCTTACGGCCATACCACCCTGGAAATGCCCGATCTCATCTGAACTCGGAAGTAAAGCAGGGTCGGGCCTGGTTAGTACTTGGATGGGAGACCGCCTGGGAATACCAGGTGCTGTAAGCT
1897	seq1	4	51509120	51509238	minus	GCTTACGGCCATACCACCCTGGAAATGCCCGATCTCATCTGAACTCGGAAGTAAAGCAGGGTCGGGCCTGGTTAGTACTTGGATGGGAGACCGCCTGGGAATACCAGGTGCTGTAAGCT
1898	seq1	4	51509297	51509415	minus	GCTTACGGCCATACCACCCTGGAAATGCCCGATCTCATCTGAACTCGGAAGTAAAGCAGGGTCGGGCCTGGTTAGTACTTGGATGGGAGACCGCCTGGGAATACCAGGTGCTGTAAGCT
1899	seq1	4	51509474	51509592	minus	GCTTACGGCCATACCACCCTGGAAATGCCCGATCTCATCTGAACTCGGAAGTAAAGCAGGGTCGGGCCTGGTTAGTACTTGGATGGGAGACCGCCTGGGAATACCAGGTGCTGTAAGCT
1900	seq1	4	51509651	51509769	minus	GCTTACGGCCATACCACCCTGGAAATGCCCGATCTCATCTGAACTCGGAAGTAAAGCAGGGTCGGGCCTGGTTAGTACTTGGATGGGAGACCGCCTGGGAATACCAGGTGCTGTAAGCT
1901	seq1	4	51509828	51509946	minus	GCTTACGGCCATACCACCCTGGAAATGCCCGATCTCATCTGAACTCGGAAGTAAAGCAGGGTCGGGCCTGGTTAGTACTTGGATGGGAGACCGCCTGGGAATACCAGGTGCTGTAAGCT
1902	seq1	4	51510005	51510123	minus	GCTTACGGCCATACCACCCTGGAAATGCCCGATCTCATCTGAACTCGGAAGTAAAGCAGGGTCGGGCCTGGTTAGTACTTGGATGGGAGACCGCCTGGGAATACCAGGTGCTGTAAGCT
1903		4	51510182	51510300	minus	GCTTACGGCCATACCACCCTGGAAATACCCGATCTCATCTGAACTCGGAAGTAATGCAGGGTCGGGCCTGGTTAGTACTTGAATGGGAGACCGCCTGGGAATACCAGGTGCTGTAAGCT
1904	seq1	4	51510359	51510477	minus	GCTTACGGCCATACCACCCTGGAAATGCCCGATCTCATCTGAACTCGGAAGTAAAGCAGGGTCGGGCCTGGTTAGTACTTGGATGGGAGACCGCCTGGGAATACCAGGTGCTGTAAGCT
1905	seq1	4	51510536	51510654	minus	GCTTACGGCCATACCACCCTGGAAATGCCCGATCTCATCTGAACTCGGAAGTAAAGCAGGGTCGGGCCTGGTTAGTACTTGGATGGGAGACCGCCTGGGAATACCAGGTGCTGTAAGCT
1906		4	51510713	51510830	minus	CTTACGGCCATACCACCCTGGAAATGCCCGATCTCATCTGAACTCGGAAGTAAAGCAGGGTCGGGCCTGGTTAGTACTTGGATGGGAGACCGCCTGGGAATACCAGGTGCTGTAAGCT
1907	seq1	4	51510890	51511008	minus	GCTTACGGCCATACCACCCTGGAAATGCCCGATCTCATCTGAACTCGGAAGTAAAGCAGGGTCGGGCCTGGTTAGTACTTGGATGGGAGACCGCCTGGGAATACCAGGTGCTGTAAGCT
1908	seq1	4	51511067	51511185	minus	GCTTACGGCCATACCACCCTGGAAATGCCCGATCTCATCTGAACTCGGAAGTAAAGCAGGGTCGGGCCTGGTTAGTACTTGGATGGGAGACCGCCTGGGAATACCAGGTGCTGTAAGCT
1909	seq1	4	51511244	51511362	minus	GCTTACGGCCATACCACCCTGGAAATGCCCGATCTCATCTGAACTCGGAAGTAAAGCAGGGTCGGGCCTGGTTAGTACTTGGATGGGAGACCGCCTGGGAATACCAGGTGCTGTAAGCT
1910	seq1	4	51511421	51511539	minus	GCTTACGGCCATACCACCCTGGAAATGCCCGATCTCATCTGAACTCGGAAGTAAAGCAGGGTCGGGCCTGGTTAGTACTTGGATGGGAGACCGCCTGGGAATACCAGGTGCTGTAAGCT
1911	seq1	4	51511598	51511716	minus	GCTTACGGCCATACCACCCTGGAAATGCCCGATCTCATCTGAACTCGGAAGTAAAGCAGGGTCGGGCCTGGTTAGTACTTGGATGGGAGACCGCCTGGGAATACCAGGTGCTGTAAGCT
1912		4	51511775	51511893	minus	GCTTACGGCCATAGCACCCTGGAAATGCCCGATCTCATCTGAACTCGGAAGTAAAGCAGGGTGGGGCCTGGTTAGTACTCGGATGGGAGACCGCCTGGGAATACCAGGTGCTGTAAGCT
1913	seq1	4	51511952	51512070	minus	GCTTACGGCCATACCACCCTGGAAATGCCCGATCTCATCTGAACTCGGAAGTAAAGCAGGGTCGGGCCTGGTTAGTACTTGGATGGGAGACCGCCTGGGAATACCAGGTGCTGTAAGCT
1914	seq1	4	51512129	51512247	minus	GCTTACGGCCATACCACCCTGGAAATGCCCGATCTCATCTGAACTCGGAAGTAAAGCAGGGTCGGGCCTGGTTAGTACTTGGATGGGAGACCGCCTGGGAATACCAGGTGCTGTAAGCT
1915		4	51512306	51512424	minus	GCTTACGGCCATACCACCCTGGAAATGTCCGATCTCATCTGAACTCGGAAGTAAAGCAGGGTCGGGCCTGGTTAGTACTTGGAAGGGAGACCGCCTGGGAATACCAGGTGCTGAAAGCT
1916	seq33	4	51512483	51512601	minus	GCTTACGGCCATACCACCCTGGAAATGCCCGATCTCATCTGAACTCGGAAGTAAAGCAGGGTCGGGCCTGGTTAGTACTTGGATGGGAGACCGCCTGGGAATACCAGGTGCTGAAAGCT
1917	seq1	4	51512660	51512778	minus	GCTTACGGCCATACCACCCTGGAAATGCCCGATCTCATCTGAACTCGGAAGTAAAGCAGGGTCGGGCCTGGTTAGTACTTGGATGGGAGACCGCCTGGGAATACCAGGTGCTGTAAGCT
1918	seq29	4	51512837	51512955	minus	GCTTACGGCCATACCACCCTGGAAATGCCCGATCTCATCTGAACTTGGAAGTAAAGCAGGGTCGGGCCTGGTTAGTACTTGGATGGGAGACCGCCTGGGAATACCAGGTGCTGTAAGCT
1919	seq1	4	51513014	51513132	minus	GCTTACGGCCATACCACCCTGGAAATGCCCGATCTCATCTGAACTCGGAAGTAAAGCAGGGTCGGGCCTGGTTAGTACTTGGATGGGAGACCGCCTGGGAATACCAGGTGCTGTAAGCT
1920	seq1	4	51513191	51513309	minus	GCTTACGGCCATACCACCCTGGAAATGCCCGATCTCATCTGAACTCGGAAGTAAAGCAGGGTCGGGCCTGGTTAGTACTTGGATGGGAGACCGCCTGGGAATACCAGGTGCTGTAAGCT
1921	seq10	4	51513368	51513486	minus	GCTTATGGCCATACCACCCTGGAAATGCCCGATCTCATCTGAACTCGGAAGTAAAGCAGGGTCGGGCCTGGTTAGTACTTGGATGGGAGACCGCCTGGGAATACCAGGTGCTGTAAGCT
1922		4	51513545	51513663	minus	GCTTACGGCCATACCACCCTGGAAATGCCCGATCTCATCTGAACTCGGAAGTAAAGCAGGGTCGGGCCTGGTTAGTACTTGGAAGGGAGACCGCCTGGGAATACCAGGTGCTGAAAGCT
1923	seq1	4	51513722	51513840	minus	GCTTACGGCCATACCACCCTGGAAATGCCCGATCTCATCTGAACTCGGAAGTAAAGCAGGGTCGGGCCTGGTTAGTACTTGGATGGGAGACCGCCTGGGAATACCAGGTGCTGTAAGCT
1924	seq33	4	51513899	51514017	minus	GCTTACGGCCATACCACCCTGGAAATGCCCGATCTCATCTGAACTCGGAAGTAAAGCAGGGTCGGGCCTGGTTAGTACTTGGATGGGAGACCGCCTGGGAATACCAGGTGCTGAAAGCT
1925	seq1	4	51514076	51514194	minus	GCTTACGGCCATACCACCCTGGAAATGCCCGATCTCATCTGAACTCGGAAGTAAAGCAGGGTCGGGCCTGGTTAGTACTTGGATGGGAGACCGCCTGGGAATACCAGGTGCTGTAAGCT
1926	seq1	4	51514253	51514371	minus	GCTTACGGCCATACCACCCTGGAAATGCCCGATCTCATCTGAACTCGGAAGTAAAGCAGGGTCGGGCCTGGTTAGTACTTGGATGGGAGACCGCCTGGGAATACCAGGTGCTGTAAGCT
1927	seq1	4	51514430	51514548	minus	GCTTACGGCCATACCACCCTGGAAATGCCCGATCTCATCTGAACTCGGAAGTAAAGCAGGGTCGGGCCTGGTTAGTACTTGGATGGGAGACCGCCTGGGAATACCAGGTGCTGTAAGCT
1928	seq55	4	51514607	51514725	minus	GCTTACGGCCATACCACCCTTGAAATGCCCGATCTCATCTGAACTCGGAAGTAAAGCAGGGTCGGGCCTGGTTAGTACTTGGATGGGAGACCGCCTGGGAATACCAGGTGCTGTAAGCT
1929	seq1	4	51514784	51514902	minus	GCTTACGGCCATACCACCCTGGAAATGCCCGATCTCATCTGAACTCGGAAGTAAAGCAGGGTCGGGCCTGGTTAGTACTTGGATGGGAGACCGCCTGGGAATACCAGGTGCTGTAAGCT
1930	seq1	4	51514961	51515079	minus	GCTTACGGCCATACCACCCTGGAAATGCCCGATCTCATCTGAACTCGGAAGTAAAGCAGGGTCGGGCCTGGTTAGTACTTGGATGGGAGACCGCCTGGGAATACCAGGTGCTGTAAGCT
1931	seq1	4	51515138	51515256	minus	GCTTACGGCCATACCACCCTGGAAATGCCCGATCTCATCTGAACTCGGAAGTAAAGCAGGGTCGGGCCTGGTTAGTACTTGGATGGGAGACCGCCTGGGAATACCAGGTGCTGTAAGCT
1932		4	51515315	51515429	minus	TACGCCATACCACCCTGGAAATGCCCGATCTCATCTGAACTCGGAAGTAAAGCAGGGTCGGGCCTGGTTAGTACTTGGATGGGAGACCGCCTGGGAATACCAGGTGCTGTAAGCT
1933	seq57	4	51515486	51515604	minus	GCTTACGGCCATACCACCCTGGAAATGCCCGATCTCATCTGAACTCGGAAGTAAAGCAGGGTCCGGCCTGGTTAGTACTTGGATGGGAGACCGCCTGGGAATACCAGGTGCTGTAAGCT
1934		4	51515663	51515781	minus	GCTTACGGCCATACCACCCTGGAAATGCCCGATCTCATCTGAACTCGGAAGTAAAGCAGGGTGGGGCCTGGTTAGTACTTGGATGGGAGACCGCCTGGGAATACCAGGTGCTGTAAGCT
1935	seq1	4	51515840	51515958	minus	GCTTACGGCCATACCACCCTGGAAATGCCCGATCTCATCTGAACTCGGAAGTAAAGCAGGGTCGGGCCTGGTTAGTACTTGGATGGGAGACCGCCTGGGAATACCAGGTGCTGTAAGCT
1936	seq1	4	51516017	51516135	minus	GCTTACGGCCATACCACCCTGGAAATGCCCGATCTCATCTGAACTCGGAAGTAAAGCAGGGTCGGGCCTGGTTAGTACTTGGATGGGAGACCGCCTGGGAATACCAGGTGCTGTAAGCT
1937		4	51516194	51516312	minus	GCTTACGGCCATACCACCCTGGAAATGCCCGATCTCATCTGAACTCGGAAGTAAAGCAGGGTCGGGCCTGGTTAGTACTTGGAAGGGAGACCGCCTGGGAATACCAGGTGCTGTAAGCT
1938	seq1	4	51516371	51516489	minus	GCTTACGGCCATACCACCCTGGAAATGCCCGATCTCATCTGAACTCGGAAGTAAAGCAGGGTCGGGCCTGGTTAGTACTTGGATGGGAGACCGCCTGGGAATACCAGGTGCTGTAAGCT
1939	seq1	4	51516548	51516666	minus	GCTTACGGCCATACCACCCTGGAAATGCCCGATCTCATCTGAACTCGGAAGTAAAGCAGGGTCGGGCCTGGTTAGTACTTGGATGGGAGACCGCCTGGGAATACCAGGTGCTGTAAGCT
1940	seq1	4	51516724	51516842	minus	GCTTACGGCCATACCACCCTGGAAATGCCCGATCTCATCTGAACTCGGAAGTAAAGCAGGGTCGGGCCTGGTTAGTACTTGGATGGGAGACCGCCTGGGAATACCAGGTGCTGTAAGCT
1941	seq1	4	51516901	51517019	minus	GCTTACGGCCATACCACCCTGGAAATGCCCGATCTCATCTGAACTCGGAAGTAAAGCAGGGTCGGGCCTGGTTAGTACTTGGATGGGAGACCGCCTGGGAATACCAGGTGCTGTAAGCT
1942	seq1	4	51517078	51517196	minus	GCTTACGGCCATACCACCCTGGAAATGCCCGATCTCATCTGAACTCGGAAGTAAAGCAGGGTCGGGCCTGGTTAGTACTTGGATGGGAGACCGCCTGGGAATACCAGGTGCTGTAAGCT
1943	seq1	4	51517255	51517373	minus	GCTTACGGCCATACCACCCTGGAAATGCCCGATCTCATCTGAACTCGGAAGTAAAGCAGGGTCGGGCCTGGTTAGTACTTGGATGGGAGACCGCCTGGGAATACCAGGTGCTGTAAGCT
1944	seq1	4	51517432	51517550	minus	GCTTACGGCCATACCACCCTGGAAATGCCCGATCTCATCTGAACTCGGAAGTAAAGCAGGGTCGGGCCTGGTTAGTACTTGGATGGGAGACCGCCTGGGAATACCAGGTGCTGTAAGCT
1945	seq1	4	51517609	51517727	minus	GCTTACGGCCATACCACCCTGGAAATGCCCGATCTCATCTGAACTCGGAAGTAAAGCAGGGTCGGGCCTGGTTAGTACTTGGATGGGAGACCGCCTGGGAATACCAGGTGCTGTAAGCT
1946	seq1	4	51517786	51517904	minus	GCTTACGGCCATACCACCCTGGAAATGCCCGATCTCATCTGAACTCGGAAGTAAAGCAGGGTCGGGCCTGGTTAGTACTTGGATGGGAGACCGCCTGGGAATACCAGGTGCTGTAAGCT
1947	seq1	4	51517963	51518081	minus	GCTTACGGCCATACCACCCTGGAAATGCCCGATCTCATCTGAACTCGGAAGTAAAGCAGGGTCGGGCCTGGTTAGTACTTGGATGGGAGACCGCCTGGGAATACCAGGTGCTGTAAGCT
1948	seq1	4	51518140	51518258	minus	GCTTACGGCCATACCACCCTGGAAATGCCCGATCTCATCTGAACTCGGAAGTAAAGCAGGGTCGGGCCTGGTTAGTACTTGGATGGGAGACCGCCTGGGAATACCAGGTGCTGTAAGCT
1949	seq1	4	51518317	51518435	minus	GCTTACGGCCATACCACCCTGGAAATGCCCGATCTCATCTGAACTCGGAAGTAAAGCAGGGTCGGGCCTGGTTAGTACTTGGATGGGAGACCGCCTGGGAATACCAGGTGCTGTAAGCT
1950		4	51518494	51518611	minus	GCTTACGGCCATACCACCCTGGAAATGCCCGATCTCATCTGAACTCGGAAGTAAAGCAGGGTCGGGCCTGGTAGTACTTGGATGGGAGACCGCCTGGGAATACCAGGTGCTGTAAGCT
1951	seq1	4	51518670	51518788	minus	GCTTACGGCCATACCACCCTGGAAATGCCCGATCTCATCTGAACTCGGAAGTAAAGCAGGGTCGGGCCTGGTTAGTACTTGGATGGGAGACCGCCTGGGAATACCAGGTGCTGTAAGCT
1952	seq1	4	51518847	51518965	minus	GCTTACGGCCATACCACCCTGGAAATGCCCGATCTCATCTGAACTCGGAAGTAAAGCAGGGTCGGGCCTGGTTAGTACTTGGATGGGAGACCGCCTGGGAATACCAGGTGCTGTAAGCT
1953	seq1	4	51519024	51519142	minus	GCTTACGGCCATACCACCCTGGAAATGCCCGATCTCATCTGAACTCGGAAGTAAAGCAGGGTCGGGCCTGGTTAGTACTTGGATGGGAGACCGCCTGGGAATACCAGGTGCTGTAAGCT
1954	seq1	4	51519201	51519319	minus	GCTTACGGCCATACCACCCTGGAAATGCCCGATCTCATCTGAACTCGGAAGTAAAGCAGGGTCGGGCCTGGTTAGTACTTGGATGGGAGACCGCCTGGGAATACCAGGTGCTGTAAGCT
1955	seq1	4	51519378	51519496	minus	GCTTACGGCCATACCACCCTGGAAATGCCCGATCTCATCTGAACTCGGAAGTAAAGCAGGGTCGGGCCTGGTTAGTACTTGGATGGGAGACCGCCTGGGAATACCAGGTGCTGTAAGCT
1956	seq1	4	51519555	51519673	minus	GCTTACGGCCATACCACCCTGGAAATGCCCGATCTCATCTGAACTCGGAAGTAAAGCAGGGTCGGGCCTGGTTAGTACTTGGATGGGAGACCGCCTGGGAATACCAGGTGCTGTAAGCT
1957	seq1	4	51519732	51519850	minus	GCTTACGGCCATACCACCCTGGAAATGCCCGATCTCATCTGAACTCGGAAGTAAAGCAGGGTCGGGCCTGGTTAGTACTTGGATGGGAGACCGCCTGGGAATACCAGGTGCTGTAAGCT
1958	seq1	4	51519909	51520027	minus	GCTTACGGCCATACCACCCTGGAAATGCCCGATCTCATCTGAACTCGGAAGTAAAGCAGGGTCGGGCCTGGTTAGTACTTGGATGGGAGACCGCCTGGGAATACCAGGTGCTGTAAGCT
1959	seq1	4	51520086	51520204	minus	GCTTACGGCCATACCACCCTGGAAATGCCCGATCTCATCTGAACTCGGAAGTAAAGCAGGGTCGGGCCTGGTTAGTACTTGGATGGGAGACCGCCTGGGAATACCAGGTGCTGTAAGCT
1960	seq1	4	51520263	51520381	minus	GCTTACGGCCATACCACCCTGGAAATGCCCGATCTCATCTGAACTCGGAAGTAAAGCAGGGTCGGGCCTGGTTAGTACTTGGATGGGAGACCGCCTGGGAATACCAGGTGCTGTAAGCT
1961	seq1	4	51520440	51520558	minus	GCTTACGGCCATACCACCCTGGAAATGCCCGATCTCATCTGAACTCGGAAGTAAAGCAGGGTCGGGCCTGGTTAGTACTTGGATGGGAGACCGCCTGGGAATACCAGGTGCTGTAAGCT
1962	seq1	4	51520617	51520735	minus	GCTTACGGCCATACCACCCTGGAAATGCCCGATCTCATCTGAACTCGGAAGTAAAGCAGGGTCGGGCCTGGTTAGTACTTGGATGGGAGACCGCCTGGGAATACCAGGTGCTGTAAGCT
1963		4	51520797	51520912	minus	GCTTACGGCCATACCACCCTGGAAATGCCCGATCTCATCTGAACTCGGAAGTAAAGCAGGGTCGGGCCTGGTTAGTACTTGGATGGGAGACCGCCTGGGAATACCAGGTGCTGTAA
1964	seq1	4	51520971	51521089	minus	GCTTACGGCCATACCACCCTGGAAATGCCCGATCTCATCTGAACTCGGAAGTAAAGCAGGGTCGGGCCTGGTTAGTACTTGGATGGGAGACCGCCTGGGAATACCAGGTGCTGTAAGCT
1965	seq1	4	51521148	51521266	minus	GCTTACGGCCATACCACCCTGGAAATGCCCGATCTCATCTGAACTCGGAAGTAAAGCAGGGTCGGGCCTGGTTAGTACTTGGATGGGAGACCGCCTGGGAATACCAGGTGCTGTAAGCT
1966	seq1	4	51521325	51521443	minus	GCTTACGGCCATACCACCCTGGAAATGCCCGATCTCATCTGAACTCGGAAGTAAAGCAGGGTCGGGCCTGGTTAGTACTTGGATGGGAGACCGCCTGGGAATACCAGGTGCTGTAAGCT
1967	seq1	4	51521502	51521620	minus	GCTTACGGCCATACCACCCTGGAAATGCCCGATCTCATCTGAACTCGGAAGTAAAGCAGGGTCGGGCCTGGTTAGTACTTGGATGGGAGACCGCCTGGGAATACCAGGTGCTGTAAGCT
1968	seq1	4	51521679	51521797	minus	GCTTACGGCCATACCACCCTGGAAATGCCCGATCTCATCTGAACTCGGAAGTAAAGCAGGGTCGGGCCTGGTTAGTACTTGGATGGGAGACCGCCTGGGAATACCAGGTGCTGTAAGCT
1969		4	51521856	51521973	minus	CTTACGGCCATACCACCCTGGAAATGCCCGATCTCATCTGAACTCGGAAGTAAAGCAGGGTCGGGCCTGGTTAGTACTTGGATGGGAGACCGCCTGGGAATACCAGGTGCTGTAAGCT
1970	seq1	4	51522033	51522151	minus	GCTTACGGCCATACCACCCTGGAAATGCCCGATCTCATCTGAACTCGGAAGTAAAGCAGGGTCGGGCCTGGTTAGTACTTGGATGGGAGACCGCCTGGGAATACCAGGTGCTGTAAGCT
1971	seq1	4	51522210	51522328	minus	GCTTACGGCCATACCACCCTGGAAATGCCCGATCTCATCTGAACTCGGAAGTAAAGCAGGGTCGGGCCTGGTTAGTACTTGGATGGGAGACCGCCTGGGAATACCAGGTGCTGTAAGCT
1972	seq1	4	51522387	51522505	minus	GCTTACGGCCATACCACCCTGGAAATGCCCGATCTCATCTGAACTCGGAAGTAAAGCAGGGTCGGGCCTGGTTAGTACTTGGATGGGAGACCGCCTGGGAATACCAGGTGCTGTAAGCT
1973	seq1	4	51522564	51522682	minus	GCTTACGGCCATACCACCCTGGAAATGCCCGATCTCATCTGAACTCGGAAGTAAAGCAGGGTCGGGCCTGGTTAGTACTTGGATGGGAGACCGCCTGGGAATACCAGGTGCTGTAAGCT
1974	seq1	4	51522741	51522859	minus	GCTTACGGCCATACCACCCTGGAAATGCCCGATCTCATCTGAACTCGGAAGTAAAGCAGGGTCGGGCCTGGTTAGTACTTGGATGGGAGACCGCCTGGGAATACCAGGTGCTGTAAGCT
1975	seq1	4	51522918	51523036	minus	GCTTACGGCCATACCACCCTGGAAATGCCCGATCTCATCTGAACTCGGAAGTAAAGCAGGGTCGGGCCTGGTTAGTACTTGGATGGGAGACCGCCTGGGAATACCAGGTGCTGTAAGCT
1976	seq1	4	51523095	51523213	minus	GCTTACGGCCATACCACCCTGGAAATGCCCGATCTCATCTGAACTCGGAAGTAAAGCAGGGTCGGGCCTGGTTAGTACTTGGATGGGAGACCGCCTGGGAATACCAGGTGCTGTAAGCT
1977	seq1	4	51523272	51523390	minus	GCTTACGGCCATACCACCCTGGAAATGCCCGATCTCATCTGAACTCGGAAGTAAAGCAGGGTCGGGCCTGGTTAGTACTTGGATGGGAGACCGCCTGGGAATACCAGGTGCTGTAAGCT
1978	seq1	4	51523449	51523567	minus	GCTTACGGCCATACCACCCTGGAAATGCCCGATCTCATCTGAACTCGGAAGTAAAGCAGGGTCGGGCCTGGTTAGTACTTGGATGGGAGACCGCCTGGGAATACCAGGTGCTGTAAGCT
1979	seq1	4	51523626	51523744	minus	GCTTACGGCCATACCACCCTGGAAATGCCCGATCTCATCTGAACTCGGAAGTAAAGCAGGGTCGGGCCTGGTTAGTACTTGGATGGGAGACCGCCTGGGAATACCAGGTGCTGTAAGCT
1980	seq58	4	51523803	51523921	minus	GCTTACGGCCATACCACCCTGGAAATGCCCGATCTCATCTGAACTCGGAAGTAAAGCAGGGTCGGGCCTGGTTAGTACTTGGATGGGAGACTGCCTGGGAATACCAGGTGCTGTAAGCT
1981	seq1	4	51523980	51524098	minus	GCTTACGGCCATACCACCCTGGAAATGCCCGATCTCATCTGAACTCGGAAGTAAAGCAGGGTCGGGCCTGGTTAGTACTTGGATGGGAGACCGCCTGGGAATACCAGGTGCTGTAAGCT
1982	seq1	4	51524157	51524275	minus	GCTTACGGCCATACCACCCTGGAAATGCCCGATCTCATCTGAACTCGGAAGTAAAGCAGGGTCGGGCCTGGTTAGTACTTGGATGGGAGACCGCCTGGGAATACCAGGTGCTGTAAGCT
1983		4	51524334	51524451	minus	CTTACGGCCATACCACCCTGGAAATGCCCGATCTCATCTGAACTCGGAAGTAAAGCAGGGTCGGGCCTGGTTAGTACTTGGATGGGAGACCGCCTGGGAATACCAGGTGCTGTAAGCT
1984	seq1	4	51524511	51524629	minus	GCTTACGGCCATACCACCCTGGAAATGCCCGATCTCATCTGAACTCGGAAGTAAAGCAGGGTCGGGCCTGGTTAGTACTTGGATGGGAGACCGCCTGGGAATACCAGGTGCTGTAAGCT
1985	seq1	4	51524688	51524806	minus	GCTTACGGCCATACCACCCTGGAAATGCCCGATCTCATCTGAACTCGGAAGTAAAGCAGGGTCGGGCCTGGTTAGTACTTGGATGGGAGACCGCCTGGGAATACCAGGTGCTGTAAGCT
1986	seq1	4	51524865	51524983	minus	GCTTACGGCCATACCACCCTGGAAATGCCCGATCTCATCTGAACTCGGAAGTAAAGCAGGGTCGGGCCTGGTTAGTACTTGGATGGGAGACCGCCTGGGAATACCAGGTGCTGTAAGCT
1987	seq1	4	51525042	51525160	minus	GCTTACGGCCATACCACCCTGGAAATGCCCGATCTCATCTGAACTCGGAAGTAAAGCAGGGTCGGGCCTGGTTAGTACTTGGATGGGAGACCGCCTGGGAATACCAGGTGCTGTAAGCT
1988	seq1	4	51525219	51525337	minus	GCTTACGGCCATACCACCCTGGAAATGCCCGATCTCATCTGAACTCGGAAGTAAAGCAGGGTCGGGCCTGGTTAGTACTTGGATGGGAGACCGCCTGGGAATACCAGGTGCTGTAAGCT
1989	seq1	4	51525396	51525514	minus	GCTTACGGCCATACCACCCTGGAAATGCCCGATCTCATCTGAACTCGGAAGTAAAGCAGGGTCGGGCCTGGTTAGTACTTGGATGGGAGACCGCCTGGGAATACCAGGTGCTGTAAGCT
1990	seq1	4	51525573	51525691	minus	GCTTACGGCCATACCACCCTGGAAATGCCCGATCTCATCTGAACTCGGAAGTAAAGCAGGGTCGGGCCTGGTTAGTACTTGGATGGGAGACCGCCTGGGAATACCAGGTGCTGTAAGCT
1991		4	51531505	51531622	minus	CTTACGGCCATACCACCCTGGAAATGCCCGATCTCATCTGAACTCGGAAGTAAAGCAGGGTCGGGCCTGGTTAGTACTTGGATGGGAGACCGCCTGGGAATACCAGGTGCTGTAAGCT
1992		4	51531682	51531799	minus	CTTACGGCCATACCACCCTGGAAATGCCCGATCTCATCTGAACTCGGAAGTAAAGCAGGGTCGGGCCTGGTTAGTACTTGGATGGGAGACCGCCTGGGAATACCAGGTGCTGTAAGCT
1993		4	51531859	51531971	minus	AAAAAAAAAAAAATGGAAATGCCCGATCTCATCTGAACTCGGAAGTAAAGCAGGGTCGGGCCTGGTTAGTACTTGGATGGGAGACCGCCTGGGAATACCAGGTGCTGTAAGCT
1994	seq1	4	51537610	51537728	minus	GCTTACGGCCATACCACCCTGGAAATGCCCGATCTCATCTGAACTCGGAAGTAAAGCAGGGTCGGGCCTGGTTAGTACTTGGATGGGAGACCGCCTGGGAATACCAGGTGCTGTAAGCT
1995	seq1	4	51537787	51537905	minus	GCTTACGGCCATACCACCCTGGAAATGCCCGATCTCATCTGAACTCGGAAGTAAAGCAGGGTCGGGCCTGGTTAGTACTTGGATGGGAGACCGCCTGGGAATACCAGGTGCTGTAAGCT
1996	seq1	4	51537964	51538082	minus	GCTTACGGCCATACCACCCTGGAAATGCCCGATCTCATCTGAACTCGGAAGTAAAGCAGGGTCGGGCCTGGTTAGTACTTGGATGGGAGACCGCCTGGGAATACCAGGTGCTGTAAGCT
1997	seq1	4	51538141	51538259	minus	GCTTACGGCCATACCACCCTGGAAATGCCCGATCTCATCTGAACTCGGAAGTAAAGCAGGGTCGGGCCTGGTTAGTACTTGGATGGGAGACCGCCTGGGAATACCAGGTGCTGTAAGCT
1998	seq1	4	51538318	51538436	minus	GCTTACGGCCATACCACCCTGGAAATGCCCGATCTCATCTGAACTCGGAAGTAAAGCAGGGTCGGGCCTGGTTAGTACTTGGATGGGAGACCGCCTGGGAATACCAGGTGCTGTAAGCT
[truncated: 7,083 more rows]
