# Supplementary material
Source: HighWire-hosted journal article supplement (doi:10.1101/rna.059642.116)
Supplement: Supplemental_Table_S2.xlsx [file Supplemental_Table_S2.xlsx]

## Sheet: Read Count percentages
Supplementary Table S2-A: Percentage 5S rRNA variant read counts of total number of 5S rRNA read counts per analyzed sample
		Egg pool			Single Embryo												Adult-male whole-body			Adult Female
	Name	technical replicate 1	technical replicate 2	technical replicate 3	64 cells (2 hpf)	high stage (3.3 hpf)	30% epiboly stage (4.7 hpf)	70% epiboly stage (7 hpf)	90% epiboly stage (9 hpf)	4- somite stage (11.3 hpf)	12-somite stage (15 hpf)	22-somite stage (20 hpf)	prim-5 stage (24 hpf)	prim-16 stage (31 hpf)	long-pec stage (48 hpf)	protruding-mouth stage (72 hpf)	technical replicate 1	technical replicate 2	technical replicate 3	tail
Variant	5Sseq1	38.9462	37.5456	38.568	47.822	52.4275	52.8468	52.4564	52.0201	47.6695	35.3923	39.4894	32.9309	32.4102	37.2371	15.5831	0.0608325	0.0246574	0.048401	0
	5Sseq3	0.247911	0.210262	0.159297	0.378788	0.195312	0.208138	0.206612	0.164908	0.176523	0.0936622	0.175055	0.0728233	0.0603422	0.0682206	0.0375799	0.00434518	0	0	0
	5Sseq4	0.632878	0.579772	0.498489	0.189394	0.251116	0.268565	0.275482	0.251484	0.235363	0.141694	0.138585	0.194575	0.181027	0.204662	0.0626331	0	0	0	0
	5Sseq5	0.170111	0.178895	0.162043	0	0.0837054	0.11414	0.0918274	0.0948219	0.0966671	0.0648431	0.0510576	0.0557553	0.0452567	0.0113701	0.0751597	0	0	0	0
	5Sseq6	3.11844	2.93023	3.13959	5.77652	2.85993	3.24292	2.58264	2.30458	2.36624	2.64896	3.68344	1.43029	1.07323	1.03468	0.438432	0.00434518	0	0	0
	5Sseq7	0.227352	0.165108	0.177149	0.284091	0.251116	0.194709	0.275482	0.272098	0.243769	0.141694	0.153173	0.159301	0.191802	0.0909608	0.100213	0	0.00352249	0	0
	5Sseq8	0.15963	0.148562	0.152774	0	0.195312	0.241708	0.252525	0.247361	0.210146	0.168112	0.131291	0.111511	0.0969786	0.0682206	0.0375799	0	0	0	0
	5Sseq9	0.927953	0.872071	0.900165	0.852273	1.57645	1.65167	1.77916	1.69443	1.60131	1.0615	1.05762	1.03204	0.965476	1.17112	0.501065	0	0	0	0
	5Sseq10	0.443015	0.466368	0.480637	0.189394	0.864955	0.45656	0.688705	0.523582	0.500147	0.427484	0.415755	0.241227	0.249989	0.318363	0.137793	0.00434518	0.00704498	0	0
	5Sseq11	0.17898	0.15718	0.154147	0.094697	0.376674	0.302135	0.332874	0.387533	0.226958	0.208939	0.306346	0.207091	0.187492	0.284252	0.125266	0	0	0	0
	5Sseq12	1.79866	2.57451	2.01284	0	0.0139509	0	0.0229568	0.0164908	0.0168117	0.0216144	0.0145879	0.00910291	0.00646524	0	0	0.00869036	0.0105675	0.0138289	0
	5Sseq13	0.922309	0.868624	0.963334	0.94697	1.92522	1.70538	1.69881	1.73978	1.79044	1.2032	0.940919	1.10031	1.07323	1.11427	0.576224	0	0	0.00345722	0
	5Sseq14	1.58623	1.63487	1.73476	1.79924	0.209263	0.154425	0.172176	0.189644	0.109276	0.309806	0.911743	0.116062	0.0969786	0.0682206	0.0626331	0	0	0	0
	5Sseq15	0.480101	0.438448	0.421587	0.094697	0.251116	0.268565	0.264004	0.333938	0.218552	0.228151	0.189643	0.134268	0.168096	0.170551	0.11274	0	0	0	0
	5Sseq16	0.688104	0.685593	0.716149	0.568182	1.38114	1.5711	1.40037	1.52127	1.37015	1.10233	0.816922	1.04911	0.907288	1.05742	0.688964	0	0	0	0
	5Sseq17	0.137863	0.130294	0.133548	0.662879	0.0697545	0.127568	0.103306	0.0989446	0.109276	0.10567	0.131291	0.0728233	0.114219	0.0454804	0.0375799	0	0	0	0
	5Sseq18	0.181801	0.192683	0.16582	0	0.15346	0.107426	0.103306	0.0989446	0.0882613	0.0912606	0.0583516	0.0625825	0.0495668	0.0454804	0.0125266	0	0	0	0
	5Sseq19	0.471232	0.440861	0.430514	0.94697	0.488281	0.496844	0.596878	0.478232	0.428698	0.379452	0.320934	0.318602	0.293091	0.306993	0.200426	0	0	0	0
	5Sseq20	0.885223	0.872071	0.872013	0.378788	1.5625	1.5711	1.76768	1.65732	1.5887	1.10954	1.0795	1.15038	0.987026	1.29619	0.425905	0	0	0	0
	5Sseq21	0.388595	0.427418	0.470681	0.473485	0.641741	0.691554	0.539486	0.585422	0.693481	0.381854	0.393873	0.336808	0.403	0.534395	0.175373	0	0	0	0
	5Sseq22	0.228965	0.182687	0.150371	0.473485	0.181362	0.22828	0.275482	0.247361	0.214349	0.115277	0.0875274	0.100132	0.0775829	0.0568505	0.0250532	0	0	0	0
	5Sseq23	0.131413	0.124089	0.112606	0.189394	0.0837054	0.107426	0.114784	0.136049	0.105073	0.0960638	0.0729395	0.0534796	0.0409465	0.0227402	0.0250532	0	0	0	0
	5Sseq24	0.141491	0.128225	0.137668	0.094697	0.390625	0.275279	0.378788	0.371042	0.23116	0.247364	0.269876	0.129716	0.1487	0.159181	0.0501065	0	0.00352249	0.00345722	0
	5Sseq26	0.178173	0.197509	0.196375	0.189394	0.390625	0.308849	0.413223	0.305079	0.382465	0.247364	0.226112	0.147922	0.159476	0.147811	0.0626331	0	0.00352249	0	0
	5Sseq27	0.27895	0.264034	0.279456	0.378788	0.265067	0.275279	0.459137	0.36692	0.285798	0.276183	0.233406	0.162714	0.189647	0.102331	0.0751597	0.00434518	0	0	0
	5Sseq29	0.295881	0.289541	0.298682	0	0.0837054	0.154425	0.21809	0.148417	0.142899	0.12008	0.0364697	0.100132	0.0754278	0.0341103	0.0626331	0	0	0	0
	5Sseq30	0.359975	0.296435	0.319967	0.189394	0.279018	0.37599	0.252525	0.38341	0.319422	0.201734	0.160467	0.172955	0.215508	0.170551	0.11274	0	0	0	0
	5Sseq31	0.565156	0.570121	0.583974	1.51515	1.26953	1.21525	1.26263	0.898747	1.0087	0.941425	0.787746	0.507487	0.459032	0.454804	0.325692	0.00434518	0.00352249	0	0
	5Sseq32	0.0628847	0.0479122	0.048407	1.89394	1.52065	1.11454	0.516529	0.845152	0.563191	0.626816	0.860686	0.176369	0.312487	0.295623	0.162846	0	0	0	0
	5Sseq33	4.44627	4.23144	4.38169	6.62879	4.6875	3.65248	3.55831	3.95366	4.16089	2.21187	4.22319	2.90724	2.74557	4.5253	1.3153	0	0	0.00691443	0
	5Sseq34	0.407944	0.396396	0.452829	0.189394	0.418527	0.443131	0.424702	0.36692	0.353045	0.228151	0.145879	0.203678	0.165941	0.136441	0.0876863	0	0	0	0
	5Sseq35	0.72519	0.663532	0.729195	0.757576	1.95312	1.40996	1.37741	1.54601	1.4416	0.953433	0.919037	0.991079	1.00642	1.19386	0.476012	0	0.00352249	0	0
	5Sseq36	0.10118	0.108233	0.108143	0	0.0697545	0.0872835	0.0918274	0.119558	0.0924642	0.0720478	0.0145879	0.0352738	0.0452567	0.0341103	0	0	0	0	0
	5Sseq37	0.280966	0.217156	0.21045	0.189394	0.265067	0.335706	0.378788	0.420515	0.294204	0.252167	0.196937	0.192299	0.170251	0.204662	0.125266	0	0	0	0
	5Sseq38	5.65721	6.67806	6.43779	0	0.0837054	0.0402847	0.0344353	0.0700858	0.0546379	0.0360239	0.0291758	0.0364116	0.0560321	0.0341103	0.0125266	0.00869036	0	0.00691443	0
	5Sseq41	0.495419	0.385366	0.356358	3.78788	0.655692	0.617698	0.596878	0.585422	0.529568	1.01587	1.84537	0.394839	0.390069	0.443434	0.175373	0	0	0	0
	5Sseq43	0.205585	0.213709	0.197748	0	0.195312	0.208138	0.321396	0.255607	0.214349	0.172915	0.0729395	0.112648	0.107754	0.0341103	0.0501065	0	0	0	0
	5Sseq44	0.320067	0.313325	0.343656	0.378788	0.265067	0.335706	0.275482	0.284466	0.30261	0.261774	0.153173	0.175231	0.163786	0.170551	0.11274	0.00869036	0.00352249	0	0
	5Sseq45	0.266454	0.269205	0.293875	0.378788	0.47433	0.362562	0.367309	0.346306	0.243769	0.256971	0.167761	0.14906	0.168096	0.0682206	0.0876863	0	0	0	0
	5Sseq46	0.114886	0.11168	0.101964	0	0.0558036	0.060427	0.0573921	0.0494723	0.0840583	0.0624415	0.0218818	0.042101	0.0387914	0.0113701	0.0125266	0	0	0	0
	5Sseq47	0.116095	0.120298	0.108487	0	0.181362	0.281993	0.298439	0.226748	0.239566	0.136891	0.196937	0.0864776	0.114219	0.0113701	0.0626331	0	0	0	0
	5Sseq48	0.892882	0.888272	0.9163	1.70455	0.599888	0.436417	0.665748	0.581299	0.508553	0.540359	1.0795	0.336808	0.357743	0.363843	0.125266	0.00434518	0.00704498	0.0103717	0
	5Sseq49	0.879983	0.88965	0.886776	0.662879	1.75781	1.6181	1.68733	1.781	1.63493	1.18639	1.06492	1.16745	1.06245	1.19386	0.463485	0	0	0	0
	5Sseq50	1.59026	1.5001	1.56035	3.31439	1.49275	1.38311	1.35445	1.42233	1.52986	1.09993	2.20277	1.02749	0.767208	1.19386	0.576224	0.00434518	0.00352249	0.00691443	0
	5Sseq51	0.666739	0.693176	0.748764	0.284091	0.47433	0.577414	0.769054	0.639017	0.668264	0.425082	0.444931	0.394839	0.480583	0.454804	0.275586	0.00434518	0	0.00345722	0
	5Sseq52	0.341432	0.275064	0.290442	0.189394	0.460379	0.174567	0.183655	0.202012	0.109276	0.189726	0.123997	0.161577	0.120684	0.147811	0.0626331	0	0	0	0
	5Sseq53	0.336594	0.347105	0.354642	0.473485	0.418527	0.543843	0.459137	0.404024	0.298407	0.307404	0.269876	0.220746	0.198267	0.227402	0.11274	0	0	0	0
	5Sseq54	0.48776	0.469471	0.454545	0.473485	0.697545	0.416275	0.631313	0.420515	0.483335	0.458705	0.466813	0.232124	0.249989	0.341103	0.100213	0	0.00352249	0	0
	5Sseq55	0.166483	0.167865	0.178866	0	0.139509	0.0872835	0.137741	0.0906992	0.0756525	0.0696462	0.0218818	0.0455145	0.0431016	0	0.0626331	0	0	0	0
	5Sseq57	0.126173	0.130983	0.119816	0	0.0418527	0.0537129	0.0573921	0.0618404	0.0546379	0.0480319	0.0291758	0.0375495	0.0495668	0.0227402	0.0125266	0	0	0	0
	5Sseq58	0.53452	0.54875	0.559942	1.51515	0.544085	0.5707	0.608356	0.614281	0.73551	0.667643	0.510576	0.312912	0.299556	0.272882	0.0876863	0	0	0	0
	5Sseq59	0.144312	0.140634	0.115696	0.189394	0.0976562	0.208138	0.275482	0.136049	0.142899	0.18012	0.153173	0.113786	0.0883583	0.0113701	0.0250532	0	0	0	0
	5Sseq60	0.0806214	0.0785898	0.0762153	0.284091	0.348772	0.107426	0.344353	0.10719	0.163914	0.172915	0.0948213	0.0785126	0.0926684	0.0795907	0.0876863	0	0.00352249	0	0
	5Sseq62	0.513155	0.432244	0.423991	0.284091	0.446429	0.429703	0.252525	0.354551	0.27319	0.182521	0.269876	0.178645	0.170251	0.193292	0.0751597	0	0	0.00345722	0
	5Sseq63	0.349494	0.371578	0.368374	0.189394	0.195312	0.308849	0.252525	0.300956	0.155508	0.216144	0.131291	0.126303	0.161631	0.125071	0.11274	0	0	0	0
	5Sseq64	0.168499	0.164418	0.127369	0.094697	0.15346	0.0939976	0.103306	0.0906992	0.0714496	0.0600399	0.0875274	0.0568932	0.0689625	0.0341103	0.0375799	0	0	0	0
	5Sseq65	0.253958	0.256106	0.306235	0.662879	0.697545	0.738552	0.826446	0.614281	0.521162	0.439492	0.401167	0.423285	0.374984	0.386583	0.137793	0	0.00352249	0	0
	5Sseq66	0.120529	0.115127	0.121189	0.189394	0.390625	0.208138	0.344353	0.305079	0.264784	0.223348	0.218818	0.135406	0.155166	0.0909608	0.0375799	0.00434518	0	0	0
	5Sseq67	0.221709	0.215777	0.199808	0.189394	0.0558036	0.174567	0.149219	0.119558	0.0588408	0.0864574	0.0437637	0.0534796	0.0474117	0.0454804	0.0250532	0	0	0	0
	5Sseq68	0.493	0.421903	0.410945	0	0.279018	0.402847	0.195133	0.288588	0.176523	0.230553	0.0948213	0.172955	0.155166	0.0909608	0.0876863	0.00434518	0	0.00691443	0
	5Sseq69	0.442612	0.409494	0.398586	0.473485	0.613839	0.698268	0.470615	0.59779	0.508553	0.401066	0.452225	0.268536	0.26292	0.306993	0.150319	0	0	0	0
	5Sseq70	0.726399	0.702827	0.716493	0.189394	0.125558	0.127568	0.0688705	0.148417	0.13029	0.0864574	0.0291758	0.0705475	0.0517219	0.0341103	0.0125266	0	0	0	0
	5Sseq72	0.495419	0.43052	0.443559	0.189394	0.292969	0.335706	0.367309	0.449373	0.4329	0.307404	0.269876	0.233262	0.228438	0.193292	0.11274	0	0	0	0
	5Sseq73	0.50469	0.46499	0.514968	0.94697	0.390625	0.281993	0.275482	0.296834	0.218552	0.235356	0.393873	0.194575	0.178872	0.102331	0.0876863	0	0	0	0
	5Sseq74	0.116498	0.0975479	0.11604	0	0.125558	0.161139	0.21809	0.247361	0.138696	0.175316	0.123997	0.0978563	0.101289	0.136441	0.0250532	0	0	0	0
	5Sseq75	0.118917	0.104442	0.117069	0.189394	0.111607	0.234994	0.160698	0.230871	0.197537	0.148899	0.116703	0.105821	0.0775829	0.0113701	0.0501065	0	0	0	0
	5Sseq77	0.112467	0.113748	0.112263	0.094697	0.279018	0.26185	0.378788	0.296834	0.315219	0.216144	0.189643	0.151336	0.146545	0.204662	0.0751597	0.00434518	0	0	0
	5Sseq79	0.440596	0.433967	0.422274	0.662879	0.530134	0.530415	0.482094	0.441128	0.516959	0.321814	0.503282	0.243503	0.256454	0.318363	0.0876863	0	0	0	0
	5Sseq80	12.1372	13.0738	12.0551	0.094697	0.0697545	0.0805694	0.0688705	0.111313	0.109276	0.0576383	0.0510576	0.0671339	0.0840481	0.113701	0.0125266	0.0173807	0.00704498	0	0
	5Sseq81	2.94188	2.90403	3.11453	0.094697	0.390625	0.469988	0.332874	0.25973	0.298407	0.242561	0.226112	0.176369	0.161631	0.125071	0.0876863	0	0	0	0
	5Sseq82	0.330145	0.285405	0.282546	1.42045	0.334821	0.362562	0.413223	0.36692	0.378263	0.533154	1.0868	0.28219	0.234904	0.216032	0.11274	0	0	0	0
	5Sseq83	0.176964	0.207505	0.188478	0.094697	0.320871	0.154425	0.298439	0.284466	0.239566	0.213742	0.160467	0.112648	0.129305	0.136441	0.0375799	0	0	0.00345722	0
	5Sseq84	0.639731	0.568053	0.470338	0.284091	0.334821	0.26185	0.344353	0.25973	0.205943	0.132088	0.116703	0.169542	0.170251	0.227402	0.0626331	0.00434518	0	0	0
	5Sseq85	0.310393	0.335041	0.353268	0.094697	0.502232	0.389419	0.355831	0.515336	0.357248	0.324215	0.262582	0.229848	0.161631	0.147811	0.0501065	0	0	0	0
	5Sseq86	0.00403107	0.00517038	0.005493	0	0	0.0671411	0.126263	0.0329815	0.20174	0.182521	0.175055	0.50066	0.224128	0.625355	0.989603	2.25949	2.42347	2.42005	3.11028
	5Sseq87	0.110048	0.10651	0.107113	3.31439	1.95312	4.47831	3.78788	5.73054	12.3103	32.4672	24.1284	41.3989	43.4399	35.6453	71.1888	97.5841	97.4779	97.4589	96.8897
	5Sseq88	0.762679	1.07234	0.872356	0.094697	0	0.0268565	0.0229568	0.0494723	0.0462321	0.012008	0	0.0102408	0.0215508	0	0.0125266	0	0	0	0
	5Sseq89	0.276532	0.240595	0.247185	0.757576	0.432478	0.396133	0.447658	0.32157	0.348842	0.365042	0.510576	0.162714	0.193957	0.113701	0.100213	0	0.00704498	0	0
	5Sseq90	0.480504	0.465679	0.486817	0.189394	0.376674	0.37599	0.401745	0.399901	0.365654	0.307404	0.160467	0.235538	0.243524	0.306993	0.162846	0	0	0	0
	5Sseq92	0.913441	0.882756	0.909778	0.662879	1.70201	1.7121	1.74472	1.65732	1.67276	1.17918	0.984683	1.07187	1.03228	1.17112	0.638858	0	0	0	0
	5Sseq93	0.898123	0.876897	0.904285	0.568182	1.57645	1.54425	1.89394	1.72741	1.65175	1.06871	0.882567	1.06959	1.00642	0.909608	0.476012	0	0	0	0
	5Sseq94	0.206391	0.231288	0.221436	0	0.516183	0.302135	0.401745	0.296834	0.294204	0.288191	0.145879	0.134268	0.129305	0.170551	0.0876863	0	0	0.00345722	0
	5Sseq95	0.513559	0.552197	0.556509	0.189394	0.181362	0.100712	0.355831	0.136049	0.13029	0.134489	0.138585	0.0739611	0.107754	0.0682206	0.0626331	0	0	0	0
		100	100	100	100	100	100	100	100	100	100	100	100	100	100	100	100	100	100	100
Type	Maternal	99.8859	99.8883	99.8874	96.6856	98.0469	95.4545	96.0859	94.2365	87.4879	67.3503	75.6966	58.1005	56.3359	63.7294	27.8216	0.156427	0.0986298	0.121003	0
	Somatic	0.114079	0.11168	0.112606	3.31439	1.95312	4.54545	3.91414	5.76352	12.5121	32.6497	24.3034	41.8995	43.6641	36.2706	72.1784	99.8436	99.9014	99.879	100

## Sheet: Raw read count
Supplementary Table S2-B: Raw read counts of 5S rRNA variants per analyzed sample
		Egg pool			Single Embryo												Adult-male whole-body			Adult female
Variant name	Merged with	technical replicate 1	technical replicate 2	technical replicate 3	64 cells (2 hpf)	high stage (3.3 hpf)	30% epiboly stage (4.7 hpf)	70% epiboly stage (7 hpf)	90% epiboly stage (9 hpf)	4- somite stage (11.3 hpf)	12-somite stage (15 hpf)	22-somite stage (20 hpf)	prim-5 stage (24 hpf)	prim-16 stage (31 hpf)	long-pec stage (48 hpf)	protruding-mouth stage (72 hpf)	technical replicate 1	technical replicate 2	technical replicate 3	tail	tot reads
5Sseq1		19708	21924	22826	119	767	1689	978	2607	2383	3072	1072	6185	3151	665	269	3	4	2	0	87424
5Sseq2	5Sseq1	13837	15622	16050	69	541	1111	618	1847	1689	2204	810	4307	2287	520	189	3	0	3	0	61707
5Sseq3		615	610	464	4	14	31	18	40	42	39	24	64	28	6	3	1	0	0	0	2003
5Sseq4		1570	1682	1452	2	18	40	24	61	56	59	19	171	84	18	5	0	0	0	0	5261
5Sseq5		422	519	472	0	6	17	8	23	23	27	7	49	21	1	6	0	0	0	0	1601
5Sseq6		7736	8501	9145	61	205	483	225	559	563	1103	505	1257	498	91	35	1	0	0	0	30968
5Sseq7		260	230	239	1	7	12	13	31	34	35	10	73	49	5	6	0	0	0	0	1005
5Sseq8		396	431	445	0	14	36	22	60	50	70	18	98	45	6	3	0	0	0	0	1694
5Sseq9		2302	2530	2622	9	113	246	155	411	381	442	145	907	448	103	40	0	0	0	0	10854
5Sseq10		886	1110	1146	1	43	46	41	81	78	116	35	139	75	19	5	0	1	0	0	3822
5Sseq11		444	456	449	1	27	45	29	94	54	87	42	182	87	25	10	0	0	0	0	2032
5Sseq12		4462	7469	5863	0	1	0	2	4	4	9	2	8	3	0	0	2	3	4	0	17836
5Sseq13		2288	2520	2806	10	138	254	148	422	426	501	129	967	498	98	46	0	0	1	0	11252
5Sseq14		3935	4743	5053	19	15	23	15	46	26	129	125	102	45	6	5	0	0	0	0	14287
5Sseq15		1191	1272	1228	1	18	40	23	81	52	95	26	118	78	15	9	0	0	0	0	4247
5Sseq16		1707	1989	2086	6	99	234	122	369	326	459	112	922	421	93	55	0	0	0	0	9000
5Sseq17		342	378	389	7	5	19	9	24	26	44	18	64	53	4	3	0	0	0	0	1385
5Sseq18		451	559	483	0	11	16	9	24	21	38	8	55	23	4	1	0	0	0	0	1703
5Sseq19		1169	1279	1254	10	35	74	52	116	102	158	44	280	136	27	16	0	0	0	0	4752
5Sseq20		2196	2530	2540	4	112	234	154	402	378	462	148	1011	458	114	34	0	0	0	0	10777
5Sseq21		964	1240	1371	5	46	103	47	142	165	159	54	296	187	47	14	0	0	0	0	4840
5Sseq22		568	530	438	5	13	34	24	60	51	48	12	88	36	5	2	0	0	0	0	1914
5Sseq23		326	360	328	2	6	16	10	33	25	40	10	47	19	2	2	0	0	0	0	1226
5Sseq24		351	372	401	1	28	41	33	90	55	103	37	114	69	14	4	0	1	1	0	1715
5Sseq25	5Sseq31	957	1074	1184	8	51	117	61	138	175	264	76	288	139	32	16	0	0	0	0	4580
5Sseq26		442	573	572	2	28	46	36	74	91	103	31	130	74	13	5	0	1	0	0	2221
5Sseq27		692	766	814	4	19	41	40	89	68	115	32	143	88	9	6	1	0	0	0	2927
5Sseq28	5Sseq1	14773	16935	17303	65	568	1214	709	1855	1740	2233	817	4354	2263	482	172	0	2	3	0	65488
5Sseq29		734	840	870	0	6	23	19	36	34	50	5	88	35	3	5	0	0	0	0	2748
5Sseq30		893	860	932	2	20	56	22	93	76	84	22	152	100	15	9	0	0	0	0	3336
5Sseq31		445	580	517	8	40	64	49	80	65	128	32	158	74	8	10	1	1	0	0	2260
5Sseq32		156	139	141	20	109	166	45	205	134	261	118	155	145	26	13	0	0	0	0	1833
5Sseq33		11030	12276	12763	70	336	544	310	959	990	921	579	2555	1274	398	105	0	0	2	0	45112
5Sseq34		1012	1150	1319	2	30	66	37	89	84	95	20	179	77	12	7	0	0	0	0	4179
5Sseq35		1799	1925	2124	8	140	210	120	375	343	397	126	871	467	105	38	0	1	0	0	9049
5Sseq36		251	314	315	0	5	13	8	29	22	30	2	31	21	3	0	0	0	0	0	1044
5Sseq37		697	630	613	2	19	50	33	102	70	105	27	169	79	18	10	0	0	0	0	2624
5Sseq38		14034	19374	18752	0	6	6	3	17	13	15	4	32	26	3	1	2	0	2	0	52290
5Sseq39	5Sseq1	15016	16734	17476	67	554	1182	668	1857	1674	2122	739	4278	2241	477	197	2	0	1	0	65285
5Sseq40	5Sseq41	599	527	506	21	18	48	29	75	58	201	110	165	77	22	4	0	0	0	0	2460
5Sseq41		630	591	532	19	29	44	23	67	68	222	143	182	104	17	10	0	0	0	0	2681
5Sseq42	5Sseq1	17191	19598	19966	98	698	1409	812	2280	1989	2571	967	5064	2608	578	211	5	1	4	0	76050
5Sseq43		510	620	576	0	14	31	28	62	51	72	10	99	50	3	4	0	0	0	0	2130
5Sseq44		794	909	1001	4	19	50	24	69	72	109	21	154	76	15	9	2	1	0	0	3329
5Sseq45		661	781	856	4	34	54	32	84	58	107	23	131	78	6	7	0	0	0	0	2916
5Sseq46		285	324	297	0	4	9	5	12	20	26	3	37	18	1	1	0	0	0	0	1042
5Sseq47		288	349	316	0	13	42	26	55	57	57	27	76	53	1	5	0	0	0	0	1365
5Sseq48		2215	2577	2669	18	43	65	58	141	121	225	148	296	166	32	10	1	2	3	0	8790
5Sseq49		2183	2581	2583	7	126	241	147	432	389	494	146	1026	493	105	37	0	0	0	0	10990
5Sseq50		3945	4352	4545	35	107	206	118	345	364	458	302	903	356	105	46	1	1	2	0	16191
5Sseq51		1654	2011	2181	3	34	86	67	155	159	177	61	347	223	40	22	1	0	1	0	7222
5Sseq52		847	798	846	2	33	26	16	49	26	79	17	142	56	13	5	0	0	0	0	2955
5Sseq53		835	1007	1033	5	30	81	40	98	71	128	37	194	92	20	9	0	0	0	0	3680
5Sseq54		895	981	971	2	25	31	30	47	59	92	33	107	56	13	2	0	1	0	0	3345
5Sseq55		413	487	521	0	10	13	12	22	18	29	3	40	20	0	5	0	0	0	0	1593
5Sseq56	5Sseq54	315	381	353	3	25	31	25	55	56	99	31	97	60	17	6	0	0	0	0	1554
5Sseq57		313	380	349	0	3	8	5	15	13	20	4	33	23	2	1	0	0	0	0	1169
5Sseq58		1326	1592	1631	16	39	85	53	149	175	278	70	275	139	24	7	0	0	0	0	5859
5Sseq59		358	408	337	2	7	31	24	33	34	75	21	100	41	1	2	0	0	0	0	1474
5Sseq60		200	228	222	3	25	16	30	26	39	72	13	69	43	7	7	0	1	0	0	1001
5Sseq61	5Sseq7	304	249	277	2	11	17	11	35	24	24	11	67	40	3	2	0	1	0	0	1078
5Sseq62		1273	1254	1235	3	32	64	22	86	65	76	37	157	79	17	6	0	0	1	0	4407
5Sseq63		867	1078	1073	2	14	46	22	73	37	90	18	111	75	11	9	0	0	0	0	3526
5Sseq64		418	477	371	1	11	14	9	22	17	25	12	50	32	3	3	0	0	0	0	1465
5Sseq65		630	743	892	7	50	110	72	149	124	183	55	372	174	34	11	0	1	0	0	3607
5Sseq66		299	334	353	2	28	31	30	74	63	93	30	119	72	8	3	1	0	0	0	1540
5Sseq67		550	626	582	2	4	26	13	29	14	36	6	47	22	4	2	0	0	0	0	1963
5Sseq68		1223	1224	1197	0	20	60	17	70	42	96	13	152	72	8	7	1	0	2	0	4204
5Sseq69		308	313	276	0	10	24	6	36	30	47	12	55	34	1	5	0	0	0	0	1157
5Sseq70		1802	2039	2087	2	9	19	6	36	31	36	4	62	24	3	1	0	0	0	0	6161
5Sseq71	5Sseq69	790	875	885	5	34	80	35	109	91	120	50	181	88	26	7	0	0	0	0	3376
5Sseq72		1229	1249	1292	2	21	50	32	109	103	128	37	205	106	17	9	0	0	0	0	4589
5Sseq73		540	595	656	4	10	13	15	27	19	42	23	66	30	2	3	0	0	0	0	2045
5Sseq74		289	283	338	0	9	24	19	60	33	73	17	86	47	12	2	0	0	0	0	1292
5Sseq75		295	303	341	2	8	35	14	56	47	62	16	93	36	1	4	0	0	0	0	1313
5Sseq76	5Sseq1	16090	18112	18720	87	630	1266	785	2172	1867	2535	1009	4753	2489	553	206	1	0	1	0	71276
5Sseq77		279	330	327	1	20	39	33	72	75	90	26	133	68	18	6	1	0	0	0	1518
5Sseq78	5Sseq10	213	243	254	1	19	22	19	46	41	62	22	73	41	9	6	1	1	0	0	1073
5Sseq79		1093	1259	1230	7	38	79	42	107	123	134	69	214	119	28	7	0	0	0	0	4549
5Sseq80		30109	37929	35114	1	5	12	6	27	26	24	7	59	39	10	1	4	2	0	0	103375
5Sseq81		7298	8425	9072	1	28	70	29	63	71	101	31	155	75	11	7	0	0	0	0	25437
5Sseq82		819	828	823	15	24	54	36	89	90	222	149	248	109	19	9	0	0	0	0	3534
5Sseq83		439	602	549	1	23	23	26	69	57	89	22	99	60	12	3	0	0	1	0	2075
5Sseq84		1587	1648	1370	3	24	39	30	63	49	55	16	149	79	20	5	1	0	0	0	5138
5Sseq85		770	972	1029	1	36	58	31	125	85	135	36	202	75	13	4	0	0	0	0	3572
5Sseq86		10	15	16	0	0	10	11	8	48	76	24	440	104	55	79	520	688	700	383	3187
5Sseq87		273	309	312	35	140	667	330	1390	2929	13519	3308	36383	20157	3135	5683	22458	27673	28190	11931	178822
5Sseq88		1892	3111	2541	1	0	4	2	12	11	5	0	9	10	0	1	0	0	0	0	7599
5Sseq89		686	698	720	8	31	59	39	78	83	152	70	143	90	10	8	0	2	0	0	2877
5Sseq90		1192	1351	1418	2	27	56	35	97	87	128	22	207	113	27	13	0	0	0	0	4775
5Sseq91	5Sseq73	712	754	844	6	18	29	9	45	33	56	31	105	53	7	4	0	0	0	0	2706
5Sseq92		2266	2561	2650	7	122	255	152	402	398	491	135	942	479	103	51	0	0	0	0	11014
5Sseq93		2228	2544	2634	6	113	230	165	419	393	445	121	940	467	80	38	0	0	0	0	10823
5Sseq94		512	671	645	0	37	45	35	72	70	120	20	118	60	15	7	0	0	1	0	2428
5Sseq95		1274	1602	1621	2	13	15	31	33	31	56	19	65	50	6	5	0	0	0	0	4823
Total 5S		248073	290114	291280	1056	7168	14894	8712	24256	23793	41639	13710	87884	46402	8795	7983	23014	28389	28925	12314
