# Supplementary material
Source: HighWire-hosted journal article supplement (doi:10.1101/rna.059642.116)
Supplement: Supplemental_Table_S3.xlsx [file Supplemental_Table_S3.xlsx]

## Sheet: Table S3
Supplementary Table S3: Expression of maternal and somatic-type 5S rRNA in Xenopus laevis
		Egg		Adult tissue (kidney)
5S rRNA type	name	reads	%	reads	%
Xenopus laevis oocyte-type	Xlo	222401	0.874895	555	0.0567311
Xenoipus Laevis trace oocyte-type	Xlt	28356	0.111549	54	0.00551978
Xenoipus Laevis oocyte-type Total		250757	0.986444	609	0.0622508
Xenoipus Laevis somatic-type	Xls	3446	0.0135561	9174	0.937749
Total		254203	1	9783	1
