# Supplementary material
Source: HighWire-hosted journal article supplement (doi:10.1101/rna.059642.116)
Supplement: Supplemental_Table_S4.xlsx [file Supplemental_Table_S4.xlsx]

## Sheet: Mutsu
Supplementary Table S4. Complete MutsuDr retrotransposons in the 5S rRNA genome regions
ID	SubFamily	Identity	ORF 1	ORF 2	Functionalˣ	Chr.	Start	End	Length	Strand	Target	5S target
Consensus	MutsuDr1*		409	1284					5746		TGGAAATGCCCGATCTCATC
1.1	MutsuDr1	0.9189	439	1283	+	4	33102239	33096869	5371	-	GT-GT-GAATTCTCGC-TG-	none
1.2	MutsuDr1	0.9997	201	139	-	4	34597571	34603302	5732	+	--------------------	maternal
1.3	MutsuDr1	0.8612	230	1100	-	4	34918751	34913677	5075	-	--------------------	maternal
1.4	MutsuDr1	0.9518	439	1284	+	4	38862802	38857229	5574	-	--------------------	maternal
1.5	MutsuDr1	0.9743	379	1253	-	4	38892228	38886682	5547	-	--------------------	maternal
1.6	MutsuDr1	0.9809	439	1283	+	4	41358815	41353261	5555	-	--------------------	maternal
1.7	MutsuDr1	0.9809	439	385	-	4	43773510	43767934	5577	-	G-CG-TG-A-TTGAAATCCA	none
1.8	MutsuDr1	0.9515	439	1284	+	4	51507980	51502405	5576	-	--------------------	maternal
1.9	MutsuDr1	0.9518	439	1284	+	4	51537532	51531959	5574	-	--------------------	maternal
1.1	MutsuDr1	0.9562	379	1253	-	4	51605249	51599703	5547	-	--------------------	maternal
1.11	MutsuDr1	0.9456	439	1285	+	4	55487807	55482321	5487	-	--------------------	maternal
Consensus	MutsuDr2*		426	1233					5551		GAAATGCCCGATCTCATCTG
2.1	MutsuDr2	0.9353	321	1233	-	4	34591984	34597175	5192	+	TGCCC-AT-TCATCTGAACT	none
2.2	MutsuDr2	0.9849	425	1287	+	4	35006081	35011633	5553	+	--------------------	maternal
2.3	MutsuDr2	0.9689	287	1283	-	4	35570333	35575846	5514	+	--------------------	maternal
2.4	MutsuDr2	0.971	425	0	-	4	38856695	38852122	4574	-	sequence unavailable	?
2.5	MutsuDr2	0.9847	426	1233	+	4	42201930	42207483	5554	+	--------------------	maternal
2.6	MutsuDr2	0.9114	321	268	-	4	47491293	47486119	5175	-	-----AG-TC-GTGGG-AGA	none
2.7	MutsuDr2	0.9765	425	1287	+	4	51501871	51496294	5578	-	--------------------	maternal
2.8	MutsuDr2	0.9765	425	1287	+	4	51531425	51525848	5578	-	--------------------	maternal
2.9	MutsuDr2	0.97	340	306	-	4	52325572	52320074	5499	-	--------------------	maternal
2.1	MutsuDr2	0.9932	426	1287	+	4	61785382	61790936	5555	+	--------------------	maternal
2.11	MutsuDr2	0.9942	426	1287	+	4	61842491	61848047	5557	+	--------------------	maternal
Consensus	MutsuDr3*		449	1279					5520		GAAATGCCCGATCTCATCTG
3.1	MutsuDr3	0.6295	450	1279	+	4	33882327	33887846	5520	+	--------------------	maternal
3.2	MutsuDr3	0.809	224	637	-	4	39716101	39711399	4703	-	--------------------	maternal
3.3	MutsuDr3	0.9884	450	1279	+	4	47557267	47551745	5523	-	--------------------	maternal
3.4	MutsuDr3	0.988	450	1279	+	4	62576537	62571029	5509	-	--------------------	maternal
3.5	MutsuDr3	0.9761	220	363	-	4	71208553	71203086	5468	-	--------------------	maternal
Consensus	MutsuDr4		485	1273					5533		GAAATGCCCGATCTCATCTG
4.1	MutsuDr4	0.8174	485	816	-	4	32602313	32597733	4581	-	--------------------	maternal
4.2	MutsuDr4	0.7792	455	536	-	4	32616443	32611879	4565	-	--------------------	maternal
4.3	MutsuDr4	0.9679	485	0	-	4	34896149	34890695	5455	-	CT--G--AT-GAAGG-ATCT	none
4.4	MutsuDr4	0.9752	485	710	-	4	38901324	38895801	5524	-	--------------------	maternal
4.5	MutsuDr4	0.9923	485	1273	+	4	39703787	39698233	5555	-	--GTATGGT-G-TAG-A--C	none
4.6	MutsuDr4	0.982	485	186	-	4	43259337	43264934	5598	+	--------------------	maternal
4.7	MutsuDr4	0.9746	116	537	-	4	43265275	43270818	5544	+	TCGTATAGT-G-TAGTA--C	none
4.8	MutsuDr4	0.988	460	821	-	4	45133603	45139163	5561	+	--------------------	maternal
4.9	MutsuDr4	0.9752	485	710	-	4	51614345	51608822	5524	-	--------------------	maternal
4.1	MutsuDr4	0.977	485	1273	+	4	52120134	52125707	5574	+	--------------------	maternal
4.11	MutsuDr4	0.9775	485	1273	+	4	52232971	52238546	5576	+	--------------------	maternal
4.12	MutsuDr4	0.9415	485	232	-	4	52318367	52313013	5355	-	--------------------	maternal
4.13	MutsuDr4	0.8392	264	834	-	4	53085874	53090579	4706	+	--------------------	maternal
4.14	MutsuDr4	0.9834	485	1273	+	4	53185265	53190864	5600	+	--------------------	maternal
4.15	MutsuDr4	0.9882	485	1026	-	4	53219028	53224597	5570	+	-TCGGTAGA-CATGAGA--C	none
4.16	MutsuDr4	0.9799	432	752	-	4	56530378	56535931	5554	+	TTCG-GTAGTGGT-AG-ACT	none
Consensus	MutsuDr5		482	1286					5638		GAAATGCCCGATCTCATCTG
5.1	MutsuDr5	0.9335	297	366	-	4	34999163	35004487	5325	+	--------------------	maternal
5.2	MutsuDr5	0.8227	207	0	-	4	37592519	37597198	4680	+	CACTG-TAAAA--TGTC--G	none
5.3	MutsuDr5	0.9934	482	1286	+	4	38885793	38880149	5645	-	--------------------	maternal
5.4	MutsuDr5	0.9864	298	1242	-	4	43784461	43778819	5643	-	--------------------	maternal
5.5	MutsuDr5	0.9777	482	1171	-	4	47581427	47575854	5574	-	--------------------	maternal
5.6	MutsuDr5	0.9936	482	1286	+	4	51598814	51593171	5644	-	--------------------	maternal
5.7	MutsuDr5	0.8008	194	1286	-	4	52227037	52231614	4578	+	--------------------	maternal
5.8	MutsuDr5	0.9431	131	1286	-	4	53091474	53097395	5922	+	--------------------	maternal
5.9	MutsuDr5	0.9443	329	475	-	4	55336418	55330996	5423	-	--------------------	maternal
5.1	MutsuDr5	0.9473	167	735	-	4	55666056	55660608	5449	-	--------------------	maternal
5.11	MutsuDr5	0.9905	424	638	-	4	65003469	65009108	5640	+	--------------------	maternal
Consensus	MutsuDr6		436	1282					5534		GGAAATGCCCGATCTCATCT
6.1	MutsuDr6	0.9944	436	1282	+	4	32610994	32605442	5553	-	-------------------G	maternal
6.2	MutsuDr6	0.9978	436	1297	+	4	37656393	37650862	5532	-	TCGT--AATG-T-AGT-CTC	none
6.3	MutsuDr6	0.9879	436	295	-	4	41346681	41341190	5492	-	T-GTTAAGG---CGGAC-AG	none
6.4	MutsuDr6	0.9978	396	1263	-	4	47525636	47520102	5535	-	--------------------	maternal
6.5	MutsuDr6	0.9991	436	1282	+	4	56409658	56404123	5536	-	--------------------	maternal
6.6	MutsuDr6	0.998	436	1282	+	4	61725685	61731218	5534	+	--------------------	maternal
6.7	MutsuDr6	0.9982	436	1282	+	4	61793414	61798947	5534	+	--------------------	maternal
Consensus	MutsuDr7		379	1281					5453		GGAAATGCCCGATCTCATCT
7.1	MutsuDr7	0.9929	379	702	-	4	34904295	34898833	5463	-	--------------------	maternal
7.2	MutsuDr7	0.9121	310	257	-	4	43253713	43258741	5029	+	--------------------	maternal
7.3	MutsuDr7	0.9927	379	1067	-	4	45142349	45147802	5454	+	-TGGTA-AATTC--G-C-GC	none
7.4	MutsuDr7	0.9905	379	790	-	4	46749626	46744184	5443	-	--------------------	maternal
7.5	MutsuDr7	0.9941	379	1277	+	4	47588719	47583281	5439	-	AATG-A--A-TTCGAA-AGC	none
7.6	MutsuDr7	0.9906	379	423	-	4	52310888	52305446	5443	-	--------------------	maternal
Consensus	MutsuDrS2		417	1233					5478		AGCACGCCCGATCTCGTCCG
S2.1	MutsuDrS2	1	251	1233	-	18	30068425	30062948	5478	-	--------------------	somatic
S2.2	MutsuDrS2	0.999	251	1233	-	18	30083738	30078261	5478	-	--------------------	somatic
Consensus	MutsuDrS3		482	1280					5699		AGGACGCCCGATCTTATCCG
S3.1	MutsuDrS3	1	482	128	-	18	30103427	30097761	5667	-	--------------------	somatic
	* dowloaded from Dfam		Likey an intact ORF		ˣ + = both ORFs intact

## Sheet: Chromosome 4
Name	Type	Start	End	Strand	Size (nt)	Spacer (nt)
5SNONexpr	5s_nonexpressed	406210	406333	+	124
5SNONexpr	5s_nonexpressed	511646	511749	-	104	105312
5SNONexpr	5s_nonexpressed	540819	540942	+	124	29069
5SNONexpr	5s_nonexpressed	583084	583192	+	109	42141
5SNONexpr	5s_nonexpressed	597487	597600	-	114	14294
5SNONexpr	5s_nonexpressed	972128	972237	-	110	374527
5SNONexpr	5s_nonexpressed	1156751	1156863	-	113	184513
5SNONexpr	5s_nonexpressed	1178075	1178196	+	122	21211
5SNONexpr	5s_nonexpressed	1858006	1858131	+	126	679809
5SNONexpr	5s_nonexpressed	2383346	2383461	+	116	525214
5SNONexpr	5s_nonexpressed	2651812	2651918	+	107	268350
5SNONexpr	5s_nonexpressed	3157783	3157899	+	117	505864
5SNONexpr	5s_nonexpressed	3182980	3183096	+	117	25080
5SNONexpr	5s_nonexpressed	3934935	3935055	-	121	751838
5SNONexpr	5s_nonexpressed	4390036	4390159	-	124	454980
5SNONexpr	5s_nonexpressed	4681828	4681938	+	111	291668
5SNONexpr	5s_nonexpressed	5018229	5018344	-	116	336290
5SNONexpr	5s_nonexpressed	6062405	6062516	+	112	1044060
5SNONexpr	5s_nonexpressed	6088869	6088971	+	103	26352
5SNONexpr	5s_nonexpressed	6862364	6862472	+	109	773392
5SNONexpr	5s_nonexpressed	6906146	6906281	+	136	43673
5SNONexpr	5s_nonexpressed	7016599	7016713	+	115	110317
5SNONexpr	5s_nonexpressed	7176633	7176737	-	105	159919
5SNONexpr	5s_nonexpressed	7450517	7450641	+	125	273779
5SNONexpr	5s_nonexpressed	7671343	7671465	-	123	220701
5SNONexpr	5s_nonexpressed	8125966	8126081	+	116	454500
5SNONexpr	5s_nonexpressed	8132717	8132837	-	121	6635
5SNONexpr	5s_nonexpressed	8367627	8367738	+	112	234789
5SNONexpr	5s_nonexpressed	8502772	8502885	+	114	135033
5SNONexpr	5s_nonexpressed	8586871	8586992	-	122	83985
5SNONexpr	5s_nonexpressed	8940020	8940121	+	102	353027
5SNONexpr	5s_nonexpressed	9110166	9110280	-	115	170044
5SNONexpr	5s_nonexpressed	9429348	9429471	+	124	319067
5SNONexpr	5s_nonexpressed	9927721	9927835	-	115	498249
5SNONexpr	5s_nonexpressed	10221461	10221575	-	115	293625
5SNONexpr	5s_nonexpressed	10492349	10492473	+	125	270773
5SNONexpr	5s_nonexpressed	10662705	10662829	-	125	170231
5SNONexpr	5s_nonexpressed	11567191	11567314	+	124	904361
5SNONexpr	5s_nonexpressed	12596831	12596955	-	125	1029516
5SNONexpr	5s_nonexpressed	12841864	12841993	+	130	244908
5SNONexpr	5s_nonexpressed	13295789	13295903	-	115	453795
5SNONexpr	5s_nonexpressed	13396036	13396156	-	121	100132
5SNONexpr	5s_nonexpressed	14377672	14377789	-	118	981515
5SNONexpr	5s_nonexpressed	14745826	14745937	-	112	368036
5SNONexpr	5s_nonexpressed	15465473	15465585	-	113	719535
5SNONexpr	5s_nonexpressed	16214662	16214785	-	124	749076
5SNONexpr	5s_nonexpressed	17073004	17073121	+	118	858218
5SNONexpr	5s_nonexpressed	17982525	17982643	-	119	909403
5SNONexpr	5s_nonexpressed	18122844	18122958	+	115	140200
5SNONexpr	5s_nonexpressed	18124877	18124986	-	110	1918
5SNONexpr	5s_nonexpressed	18172645	18172765	-	121	47658
5SNONexpr	5s_nonexpressed	18200430	18200541	-	112	27664
5SNONexpr	5s_nonexpressed	18321549	18321675	+	127	121007
5SNONexpr	5s_nonexpressed	18927992	18928100	+	109	606316
5SNONexpr	5s_nonexpressed	19108348	19108468	+	121	180247
5SNONexpr	5s_nonexpressed	20304663	20304779	+	117	1196194
5SNONexpr	5s_nonexpressed	20675074	20675195	-	122	370294
5SNONexpr	5s_nonexpressed	20788753	20788870	+	118	113557
5SNONexpr	5s_nonexpressed	21070048	21070164	+	117	281177
5SNONexpr	5s_nonexpressed	21905788	21905892	+	105	835623
5SNONexpr	5s_nonexpressed	22120878	22120993	+	116	214985
5SNONexpr	5s_nonexpressed	23516020	23516142	-	123	1395026
5SNONexpr	5s_nonexpressed	23658288	23658403	+	116	142145
5SNONexpr	5s_nonexpressed	23698345	23698480	-	136	39941
5SNONexpr	5s_nonexpressed	23730842	23730956	-	115	32361
5SNONexpr	5s_nonexpressed	24858915	24859034	-	120	1127958
5SNONexpr	5s_nonexpressed	25128186	25128289	-	104	269151
5SNONexpr	5s_nonexpressed	25554681	25554805	+	125	426391
5SNONexpr	5s_nonexpressed	25851585	25851704	-	120	296779
5SNONexpr	5s_nonexpressed	26168627	26168761	-	135	316922
5SNONexpr	5s_nonexpressed	26417948	26418065	-	118	249186
5SNONexpr	5s_nonexpressed	26581504	26581623	+	120	163438
5SNONexpr	5s_nonexpressed	27151891	27152015	-	125	570267
5SNONexpr	5s_nonexpressed	27661290	27661400	-	111	509274
5SNONexpr	5s_nonexpressed	27668803	27668911	+	109	7402
5SNONexpr	5s_nonexpressed	27693235	27693346	-	112	24323
5SNONexpr	5s_nonexpressed	27893146	27893247	-	102	199799
5SNONexpr	5s_nonexpressed	28077899	28078013	-	115	184651
5SNONexpr	5s_nonexpressed	28443043	28443156	-	114	365029
5SNONexpr	5s_nonexpressed	28552418	28552539	-	122	109261
5SNONexpr	5s_nonexpressed	28813997	28814117	-	121	261457
5SNONexpr	5s_nonexpressed	28909850	28909967	-	118	95732
5SNONexpr	5s_nonexpressed	31078595	31078707	+	113	2168627
5SNONexpr	5s_nonexpressed	32199486	32199604	-	119	1120778
5SNONexpr	5s_nonexpressed	32597339	32597457	-	119	397734
MutsuDr 4	LINE	32597733	32602313	-	4581	275
5Sseq1	5s_expressed	32602514	32602632	-	119	200
5SNONexpr	5s_nonexpressed	32602811	32602928	-	118	178
5SNONexpr	5s_nonexpressed	32603109	32603226	-	118	180
5SNONexpr	5s_nonexpressed	32603407	32603525	-	119	180
5Sseq3	5s_expressed	32603584	32603702	-	119	58
5SNONexpr	5s_nonexpressed	32603761	32603874	-	114	58
5SNONexpr	5s_nonexpressed	32603933	32604046	-	114	58
5Sseq1	5s_expressed	32604105	32604223	-	119	58
5SNONexpr	5s_nonexpressed	32604282	32604400	-	119	58
5Sseq4	5s_expressed	32604459	32604577	-	119	58
5Sseq5	5s_expressed	32604636	32604754	-	119	58
5Sseq6	5s_expressed	32604813	32604931	-	119	58
5SNONexpr	5s_nonexpressed	32604990	32605108	-	119	58
5SNONexpr	5s_nonexpressed	32605167	32605285	-	119	58
MutsuDr 6	LINE	32605442	32610994	-	5553	156
5SNONexpr	5s_nonexpressed	32611073	32611191	-	119	78
5SNONexpr	5s_nonexpressed	32611250	32611368	-	119	58
5SNONexpr	5s_nonexpressed	32611427	32611545	-	119	58
5Sseq1	5s_expressed	32611604	32611722	-	119	58
5SNONexpr	5s_nonexpressed	32611781	32611878	-	98	58
MutsuDr 4	LINE	32611879	32616443	-	4565	0
5SNONexpr	5s_nonexpressed	32792471	32792577	+	107	176027
5Sseq1	5s_expressed	33032926	33033044	-	119	240348
5Sseq1	5s_expressed	33033103	33033221	-	119	58
5Sseq1	5s_expressed	33033280	33033398	-	119	58
5Sseq1	5s_expressed	33033457	33033575	-	119	58
MutsuDr 1	LINE	33096869	33102239	-	5371	63293
5SNONexpr	5s_nonexpressed	33102464	33102582	-	119	224
5SNONexpr	5s_nonexpressed	33102761	33102879	-	119	178
5SNONexpr	5s_nonexpressed	33103058	33103176	-	119	178
5SNONexpr	5s_nonexpressed	33103355	33103473	-	119	178
5SNONexpr	5s_nonexpressed	33316170	33316293	-	124	212696
5SNONexpr	5s_nonexpressed	33655256	33655376	-	121	338962
5SNONexpr	5s_nonexpressed	33882021	33882125	+	105	226644
MutsuDr 3	LINE	33882327	33887846	+	5520	201
5SNONexpr	5s_nonexpressed	34266281	34266389	+	109	378434
MutsuDr 2	LINE	34591984	34597175	+	5192	325594
5Sseq1	5s_expressed	34597452	34597570	+	119	276
MutsuDr 1	LINE	34597571	34603302	+	5732	0
5SNONexpr	5s_nonexpressed	34603303	34603402	+	100	0
5Sseq1	5s_expressed	34603461	34603579	+	119	58
5Sseq1	5s_expressed	34603638	34603756	+	119	58
5Sseq1	5s_expressed	34603815	34603933	+	119	58
5Sseq1	5s_expressed	34603992	34604110	+	119	58
5Sseq1	5s_expressed	34604169	34604287	+	119	58
5Sseq1	5s_expressed	34604346	34604464	+	119	58
5Sseq1	5s_expressed	34604523	34604641	+	119	58
5SNONexpr	5s_nonexpressed	34604700	34604818	+	119	58
5Sseq1	5s_expressed	34604877	34604995	+	119	58
5SNONexpr	5s_nonexpressed	34605054	34605172	+	119	58
5Sseq1	5s_expressed	34605231	34605349	+	119	58
5Sseq1	5s_expressed	34605408	34605526	+	119	58
5Sseq7	5s_expressed	34605585	34605703	+	119	58
5Sseq1	5s_expressed	34605762	34605880	+	119	58
5Sseq1	5s_expressed	34605939	34606057	+	119	58
5Sseq1	5s_expressed	34606116	34606234	+	119	58
5Sseq7	5s_expressed	34606293	34606411	+	119	58
5Sseq8	5s_expressed	34606470	34606588	+	119	58
5Sseq1	5s_expressed	34606647	34606765	+	119	58
5Sseq9	5s_expressed	34606824	34606942	+	119	58
5Sseq7	5s_expressed	34607001	34607119	+	119	58
5Sseq1	5s_expressed	34607178	34607296	+	119	58
5Sseq1	5s_expressed	34607355	34607473	+	119	58
5Sseq1	5s_expressed	34607532	34607650	+	119	58
5Sseq1	5s_expressed	34607709	34607827	+	119	58
5Sseq9	5s_expressed	34607886	34608004	+	119	58
5Sseq7	5s_expressed	34608063	34608181	+	119	58
5Sseq1	5s_expressed	34608240	34608358	+	119	58
5Sseq1	5s_expressed	34608417	34608535	+	119	58
5Sseq1	5s_expressed	34608594	34608712	+	119	58
5Sseq1	5s_expressed	34608771	34608889	+	119	58
5Sseq1	5s_expressed	34608948	34609066	+	119	58
5Sseq1	5s_expressed	34609125	34609243	+	119	58
5Sseq1	5s_expressed	34609302	34609420	+	119	58
5Sseq1	5s_expressed	34609479	34609597	+	119	58
5Sseq10	5s_expressed	34609656	34609774	+	119	58
5Sseq11	5s_expressed	34609833	34609951	+	119	58
5Sseq1	5s_expressed	34610010	34610128	+	119	58
5Sseq1	5s_expressed	34610187	34610305	+	119	58
5Sseq1	5s_expressed	34610364	34610482	+	119	58
5SNONexpr	5s_nonexpressed	34610541	34610659	+	119	58
5Sseq7	5s_expressed	34610718	34610836	+	119	58
5Sseq10	5s_expressed	34610895	34611013	+	119	58
5Sseq7	5s_expressed	34611072	34611190	+	119	58
5Sseq1	5s_expressed	34611249	34611367	+	119	58
5Sseq1	5s_expressed	34611426	34611544	+	119	58
5Sseq10	5s_expressed	34611603	34611721	+	119	58
5Sseq11	5s_expressed	34611780	34611898	+	119	58
5Sseq1	5s_expressed	34611957	34612075	+	119	58
5Sseq10	5s_expressed	34612134	34612252	+	119	58
5Sseq1	5s_expressed	34612311	34612429	+	119	58
5Sseq10	5s_expressed	34612488	34612606	+	119	58
5SNONexpr	5s_nonexpressed	34612665	34612783	+	119	58
5Sseq7	5s_expressed	34612842	34612960	+	119	58
5Sseq1	5s_expressed	34613019	34613137	+	119	58
5Sseq1	5s_expressed	34613196	34613314	+	119	58
5Sseq7	5s_expressed	34613373	34613491	+	119	58
5Sseq1	5s_expressed	34613550	34613668	+	119	58
5Sseq1	5s_expressed	34613727	34613845	+	119	58
5SNONexpr	5s_nonexpressed	34613904	34614022	+	119	58
5SNONexpr	5s_nonexpressed	34614081	34614199	+	119	58
5Sseq1	5s_expressed	34614258	34614376	+	119	58
5Sseq10	5s_expressed	34614435	34614553	+	119	58
5SNONexpr	5s_nonexpressed	34614612	34614730	+	119	58
5Sseq7	5s_expressed	34614789	34614907	+	119	58
5Sseq1	5s_expressed	34614966	34615084	+	119	58
5Sseq1	5s_expressed	34615143	34615261	+	119	58
5Sseq1	5s_expressed	34615320	34615438	+	119	58
5Sseq1	5s_expressed	34615497	34615615	+	119	58
5Sseq1	5s_expressed	34615674	34615792	+	119	58
5Sseq1	5s_expressed	34615851	34615969	+	119	58
5Sseq1	5s_expressed	34616028	34616146	+	119	58
5Sseq1	5s_expressed	34616205	34616323	+	119	58
5Sseq1	5s_expressed	34616382	34616500	+	119	58
5Sseq1	5s_expressed	34616559	34616677	+	119	58
5SNONexpr	5s_nonexpressed	34616736	34616854	+	119	58
5SNONexpr	5s_nonexpressed	34616913	34617031	+	119	58
MutsuDr 4	LINE	34890695	34896149	-	5455	273663
5Sseq1	5s_expressed	34896350	34896468	-	119	200
5Sseq1	5s_expressed	34896648	34896766	-	119	179
5Sseq1	5s_expressed	34896946	34897064	-	119	179
5Sseq1	5s_expressed	34897244	34897362	-	119	179
5SNONexpr	5s_nonexpressed	34897542	34897660	-	119	179
5Sseq1	5s_expressed	34897840	34897958	-	119	179
5SNONexpr	5s_nonexpressed	34898138	34898256	-	119	179
5SNONexpr	5s_nonexpressed	34898436	34898554	-	119	179
5SNONexpr	5s_nonexpressed	34898734	34898832	-	99	179
MutsuDr 7	LINE	34898833	34904295	-	5463	0
5SNONexpr	5s_nonexpressed	34904374	34904492	-	119	78
5SNONexpr	5s_nonexpressed	34904551	34904669	-	119	58
5SNONexpr	5s_nonexpressed	34904728	34904847	-	120	58
5Sseq12	5s_expressed	34904906	34905023	-	118	58
5Sseq13	5s_expressed	34905082	34905200	-	119	58
5Sseq1	5s_expressed	34905259	34905377	-	119	58
5Sseq14	5s_expressed	34905435	34905553	-	119	57
5SNONexpr	5s_nonexpressed	34905612	34905730	-	119	58
5SNONexpr	5s_nonexpressed	34905789	34905907	-	119	58
5Sseq15	5s_expressed	34905966	34906084	-	119	58
5SNONexpr	5s_nonexpressed	34906143	34906261	-	119	58
5SNONexpr	5s_nonexpressed	34906320	34906438	-	119	58
5Sseq15	5s_expressed	34906497	34906615	-	119	58
5SNONexpr	5s_nonexpressed	34906674	34906792	-	119	58
5SNONexpr	5s_nonexpressed	34906851	34906969	-	119	58
5Sseq15	5s_expressed	34907028	34907146	-	119	58
5SNONexpr	5s_nonexpressed	34907205	34907323	-	119	58
5SNONexpr	5s_nonexpressed	34907382	34907500	-	119	58
5Sseq15	5s_expressed	34907559	34907677	-	119	58
5SNONexpr	5s_nonexpressed	34907736	34907854	-	119	58
5SNONexpr	5s_nonexpressed	34907913	34908031	-	119	58
5Sseq15	5s_expressed	34908090	34908208	-	119	58
5SNONexpr	5s_nonexpressed	34908267	34908385	-	119	58
5SNONexpr	5s_nonexpressed	34908444	34908562	-	119	58
5Sseq15	5s_expressed	34908621	34908739	-	119	58
5SNONexpr	5s_nonexpressed	34908798	34908916	-	119	58
5SNONexpr	5s_nonexpressed	34908975	34909093	-	119	58
5Sseq15	5s_expressed	34909152	34909270	-	119	58
5SNONexpr	5s_nonexpressed	34909329	34909447	-	119	58
5SNONexpr	5s_nonexpressed	34909506	34909624	-	119	58
5Sseq15	5s_expressed	34909683	34909801	-	119	58
5SNONexpr	5s_nonexpressed	34909860	34909978	-	119	58
5SNONexpr	5s_nonexpressed	34910037	34910155	-	119	58
5Sseq15	5s_expressed	34910214	34910332	-	119	58
5SNONexpr	5s_nonexpressed	34910391	34910509	-	119	58
5SNONexpr	5s_nonexpressed	34910568	34910686	-	119	58
5Sseq15	5s_expressed	34910745	34910863	-	119	58
5SNONexpr	5s_nonexpressed	34910922	34911040	-	119	58
5SNONexpr	5s_nonexpressed	34911099	34911217	-	119	58
5Sseq15	5s_expressed	34911276	34911394	-	119	58
5SNONexpr	5s_nonexpressed	34911453	34911571	-	119	58
5SNONexpr	5s_nonexpressed	34911630	34911748	-	119	58
5Sseq15	5s_expressed	34911807	34911925	-	119	58
5SNONexpr	5s_nonexpressed	34911984	34912102	-	119	58
5SNONexpr	5s_nonexpressed	34912161	34912279	-	119	58
5Sseq15	5s_expressed	34912338	34912456	-	119	58
5SNONexpr	5s_nonexpressed	34912515	34912633	-	119	58
5SNONexpr	5s_nonexpressed	34912692	34912810	-	119	58
5Sseq15	5s_expressed	34912869	34912987	-	119	58
5SNONexpr	5s_nonexpressed	34913046	34913164	-	119	58
5SNONexpr	5s_nonexpressed	34913223	34913341	-	119	58
5SNONexpr	5s_nonexpressed	34913400	34913518	-	119	58
5SNONexpr	5s_nonexpressed	34913577	34913676	-	100	58
MutsuDr 1	LINE	34913677	34918751	-	5075	0
MutsuDr 5	LINE	34999163	35004487	+	5325	80411
5Sseq1	5s_expressed	35004644	35004762	+	119	156
5Sseq1	5s_expressed	35004821	35004939	+	119	58
5Sseq16	5s_expressed	35004998	35005116	+	119	58
5Sseq1	5s_expressed	35005175	35005293	+	119	58
5Sseq1	5s_expressed	35005352	35005470	+	119	58
5SNONexpr	5s_nonexpressed	35005529	35005647	+	119	58
5Sseq1	5s_expressed	35005706	35005824	+	119	58
5Sseq1	5s_expressed	35005883	35006001	+	119	58
MutsuDr 2	LINE	35006081	35011633	+	5553	79
5Sseq17	5s_expressed	35011790	35011908	+	119	156
5Sseq1	5s_expressed	35011967	35012085	+	119	58
5SNONexpr	5s_nonexpressed	35012144	35012262	+	119	58
5SNONexpr	5s_nonexpressed	35186537	35186649	-	113	174274
5SNONexpr	5s_nonexpressed	35218571	35218683	-	113	31921
5SNONexpr	5s_nonexpressed	35271905	35272030	-	126	53221
5SNONexpr	5s_nonexpressed	35357410	35357528	+	119	85379
5SNONexpr	5s_nonexpressed	35357587	35357705	+	119	58
5Sseq1	5s_expressed	35357764	35357882	+	119	58
5Sseq1	5s_expressed	35357941	35358059	+	119	58
5Sseq1	5s_expressed	35358118	35358236	+	119	58
5Sseq1	5s_expressed	35358295	35358413	+	119	58
5Sseq18	5s_expressed	35358472	35358590	+	119	58
5SNONexpr	5s_nonexpressed	35358649	35358767	+	119	58
5Sseq19	5s_expressed	35358826	35358944	+	119	58
5SNONexpr	5s_nonexpressed	35359004	35359121	+	118	59
5Sseq20	5s_expressed	35359180	35359298	+	119	58
5SNONexpr	5s_nonexpressed	35359357	35359475	+	119	58
5Sseq1	5s_expressed	35359534	35359652	+	119	58
5Sseq21	5s_expressed	35359711	35359829	+	119	58
5SNONexpr	5s_nonexpressed	35359888	35360006	+	119	58
5SNONexpr	5s_nonexpressed	35360065	35360183	+	119	58
5Sseq1	5s_expressed	35360242	35360360	+	119	58
5SNONexpr	5s_nonexpressed	35362564	35362682	+	119	2203
5SNONexpr	5s_nonexpressed	35362741	35362858	+	118	58
5Sseq1	5s_expressed	35362917	35363035	+	119	58
5Sseq18	5s_expressed	35363094	35363212	+	119	58
5SNONexpr	5s_nonexpressed	35489125	35489249	+	125	125912
5Sseq22	5s_expressed	35566772	35566890	+	119	77522
5Sseq22	5s_expressed	35566949	35567067	+	119	58
5SNONexpr	5s_nonexpressed	35567126	35567244	+	119	58
5SNONexpr	5s_nonexpressed	35567303	35567421	+	119	58
5Sseq1	5s_expressed	35567480	35567598	+	119	58
5Sseq1	5s_expressed	35567657	35567775	+	119	58
5Sseq1	5s_expressed	35567834	35567952	+	119	58
5Sseq23	5s_expressed	35568011	35568129	+	119	58
5Sseq1	5s_expressed	35568188	35568306	+	119	58
5Sseq1	5s_expressed	35568365	35568483	+	119	58
5Sseq24	5s_expressed	35568542	35568660	+	119	58
5SNONexpr	5s_nonexpressed	35568719	35568837	+	119	58
5SNONexpr	5s_nonexpressed	35568896	35569014	+	119	58
5Sseq1	5s_expressed	35569073	35569191	+	119	58
5Sseq1	5s_expressed	35569250	35569368	+	119	58
5SNONexpr	5s_nonexpressed	35569427	35569545	+	119	58
5Sseq1	5s_expressed	35569604	35569722	+	119	58
5Sseq23	5s_expressed	35569781	35569899	+	119	58
5Sseq1	5s_expressed	35569958	35570076	+	119	58
5SNONexpr	5s_nonexpressed	35570135	35570251	+	117	58
MutsuDr 2	LINE	35570333	35575846	+	5514	81
5SNONexpr	5s_nonexpressed	35576003	35576121	+	119	156
5Sseq24	5s_expressed	35576180	35576298	+	119	58
5Sseq1	5s_expressed	35576357	35576475	+	119	58
5Sseq26	5s_expressed	35576534	35576652	+	119	58
5Sseq13	5s_expressed	35576711	35576829	+	119	58
5Sseq1	5s_expressed	35576888	35577006	+	119	58
5Sseq1	5s_expressed	35577065	35577183	+	119	58
5Sseq1	5s_expressed	35577242	35577360	+	119	58
5Sseq1	5s_expressed	35577419	35577537	+	119	58
5Sseq1	5s_expressed	35577596	35577714	+	119	58
5Sseq1	5s_expressed	35577773	35577891	+	119	58
5SNONexpr	5s_nonexpressed	35577950	35578071	+	122	58
5Sseq1	5s_expressed	35578130	35578248	+	119	58
5SNONexpr	5s_nonexpressed	35578307	35578425	+	119	58
5Sseq1	5s_expressed	35578484	35578602	+	119	58
5SNONexpr	5s_nonexpressed	35578661	35578779	+	119	58
5SNONexpr	5s_nonexpressed	35578838	35578956	+	119	58
5Sseq1	5s_expressed	35579015	35579133	+	119	58
5Sseq1	5s_expressed	35579192	35579310	+	119	58
5Sseq27	5s_expressed	35579369	35579487	+	119	58
5SNONexpr	5s_nonexpressed	35579546	35579654	+	109	58
5Sseq1	5s_expressed	35579713	35579831	+	119	58
5Sseq1	5s_expressed	35579890	35580008	+	119	58
5SNONexpr	5s_nonexpressed	35580069	35580185	+	117	60
5SNONexpr	5s_nonexpressed	35580244	35580362	+	119	58
5SNONexpr	5s_nonexpressed	35580421	35580539	+	119	58
5SNONexpr	5s_nonexpressed	35580598	35580716	+	119	58
5Sseq29	5s_expressed	35580775	35580893	+	119	58
5Sseq1	5s_expressed	35580952	35581070	+	119	58
5Sseq1	5s_expressed	35581129	35581247	+	119	58
5Sseq30	5s_expressed	35581306	35581424	+	119	58
5SNONexpr	5s_nonexpressed	35581483	35581601	+	119	58
5Sseq1	5s_expressed	35581660	35581778	+	119	58
5SNONexpr	5s_nonexpressed	35581837	35581955	+	119	58
5Sseq1	5s_expressed	35582014	35582132	+	119	58
5Sseq1	5s_expressed	35582191	35582309	+	119	58
5Sseq1	5s_expressed	35582368	35582486	+	119	58
5Sseq1	5s_expressed	35582545	35582663	+	119	58
5Sseq1	5s_expressed	35582722	35582840	+	119	58
5Sseq1	5s_expressed	35582899	35583017	+	119	58
5Sseq1	5s_expressed	35583076	35583194	+	119	58
5Sseq1	5s_expressed	35583253	35583371	+	119	58
5Sseq1	5s_expressed	35583430	35583548	+	119	58
5Sseq1	5s_expressed	35583607	35583725	+	119	58
5Sseq1	5s_expressed	35583784	35583902	+	119	58
5Sseq1	5s_expressed	35583961	35584079	+	119	58
5Sseq1	5s_expressed	35584138	35584256	+	119	58
5Sseq1	5s_expressed	35584315	35584433	+	119	58
5SNONexpr	5s_nonexpressed	35584492	35584610	+	119	58
5Sseq29	5s_expressed	35584669	35584787	+	119	58
5Sseq1	5s_expressed	35584846	35584964	+	119	58
5Sseq1	5s_expressed	35585023	35585141	+	119	58
5Sseq1	5s_expressed	35585200	35585318	+	119	58
5SNONexpr	5s_nonexpressed	35585377	35585495	+	119	58
5Sseq1	5s_expressed	35585554	35585672	+	119	58
5Sseq1	5s_expressed	35585731	35585849	+	119	58
5Sseq31	5s_expressed	35585908	35586026	+	119	58
5SNONexpr	5s_nonexpressed	36037890	36038007	+	118	451863
5SNONexpr	5s_nonexpressed	36110683	36110801	+	119	72675
5SNONexpr	5s_nonexpressed	36311021	36311146	+	126	200219
5SNONexpr	5s_nonexpressed	36325698	36325799	+	102	14551
5SNONexpr	5s_nonexpressed	36365086	36365194	+	109	39286
5SNONexpr	5s_nonexpressed	36630945	36631063	-	119	265750
5SNONexpr	5s_nonexpressed	36631242	36631360	-	119	178
5SNONexpr	5s_nonexpressed	36718421	36718539	+	119	87060
5Sseq32	5s_expressed	37072797	37072915	-	119	354257
5SNONexpr	5s_nonexpressed	37072974	37073092	-	119	58
MutsuDr 4	LINE inc	37073249	37077530	-	4282	156
5SNONexpr	5s_nonexpressed	37217504	37217608	-	105	139973
5SNONexpr	5s_nonexpressed	37522009	37522113	+	105	304400
5SNONexpr	5s_nonexpressed	37538760	37538883	+	124	16646
MutsuDr 5	LINE	37592519	37597198	+	4680	53635
MutsuDr 6	LINE	37650862	37656393	-	5532	53663
5SNONexpr	5s_nonexpressed	37668933	37669051	+	119	12539
5SNONexpr	5s_nonexpressed	37669231	37669349	+	119	179
5SNONexpr	5s_nonexpressed	37669528	37669646	+	119	178
5SNONexpr	5s_nonexpressed	37669825	37669943	+	119	178
5SNONexpr	5s_nonexpressed	38375665	38375789	-	125	705721
5SNONexpr	5s_nonexpressed	38768940	38769072	+	133	393150
MutsuDr 2	LINE	38852122	38856695	-	4574	83049
5SNONexpr	5s_nonexpressed	38856775	38856892	-	118	79
5SNONexpr	5s_nonexpressed	38856952	38857069	-	118	59
5SNONexpr	5s_nonexpressed	38857129	38857228	-	100	59
MutsuDr 1	LINE	38857229	38862802	-	5574	0
5Sseq1	5s_expressed	38862880	38862998	-	119	77
5Sseq1	5s_expressed	38863057	38863175	-	119	58
5Sseq1	5s_expressed	38863234	38863352	-	119	58
5Sseq10	5s_expressed	38863411	38863529	-	119	58
5SNONexpr	5s_nonexpressed	38863588	38863706	-	119	58
5Sseq1	5s_expressed	38863765	38863883	-	119	58
5Sseq1	5s_expressed	38863942	38864060	-	119	58
5Sseq1	5s_expressed	38864119	38864237	-	119	58
5Sseq33	5s_expressed	38864296	38864414	-	119	58
5Sseq1	5s_expressed	38864473	38864591	-	119	58
5Sseq1	5s_expressed	38864650	38864768	-	119	58
5SNONexpr	5s_nonexpressed	38864827	38864944	-	118	58
5Sseq1	5s_expressed	38865004	38865122	-	119	59
5Sseq1	5s_expressed	38865181	38865299	-	119	58
5Sseq1	5s_expressed	38865358	38865476	-	119	58
5Sseq1	5s_expressed	38865535	38865653	-	119	58
5Sseq1	5s_expressed	38865712	38865830	-	119	58
5Sseq1	5s_expressed	38865889	38866007	-	119	58
5Sseq1	5s_expressed	38866066	38866184	-	119	58
5Sseq1	5s_expressed	38866243	38866361	-	119	58
5Sseq1	5s_expressed	38866420	38866538	-	119	58
5Sseq1	5s_expressed	38866597	38866715	-	119	58
5Sseq1	5s_expressed	38866774	38866892	-	119	58
5Sseq1	5s_expressed	38866951	38867069	-	119	58
5Sseq1	5s_expressed	38867128	38867246	-	119	58
5Sseq1	5s_expressed	38867305	38867423	-	119	58
5Sseq1	5s_expressed	38867482	38867600	-	119	58
5Sseq1	5s_expressed	38867659	38867777	-	119	58
5Sseq1	5s_expressed	38867836	38867954	-	119	58
5Sseq1	5s_expressed	38868013	38868131	-	119	58
5Sseq1	5s_expressed	38868190	38868308	-	119	58
5Sseq1	5s_expressed	38868367	38868485	-	119	58
5Sseq1	5s_expressed	38868544	38868662	-	119	58
5Sseq1	5s_expressed	38868721	38868839	-	119	58
5Sseq1	5s_expressed	38868898	38869016	-	119	58
5Sseq1	5s_expressed	38869075	38869193	-	119	58
5Sseq1	5s_expressed	38869252	38869370	-	119	58
5Sseq1	5s_expressed	38869429	38869547	-	119	58
5Sseq1	5s_expressed	38869606	38869724	-	119	58
5Sseq1	5s_expressed	38869783	38869901	-	119	58
5Sseq1	5s_expressed	38869960	38870078	-	119	58
5Sseq1	5s_expressed	38870137	38870255	-	119	58
5Sseq1	5s_expressed	38870314	38870432	-	119	58
5Sseq1	5s_expressed	38870491	38870609	-	119	58
5Sseq1	5s_expressed	38870668	38870786	-	119	58
5Sseq1	5s_expressed	38870845	38870963	-	119	58
5Sseq1	5s_expressed	38871022	38871140	-	119	58
5Sseq1	5s_expressed	38871199	38871317	-	119	58
5Sseq1	5s_expressed	38871376	38871494	-	119	58
5Sseq1	5s_expressed	38871553	38871671	-	119	58
5Sseq1	5s_expressed	38871730	38871848	-	119	58
5Sseq1	5s_expressed	38871907	38872025	-	119	58
5Sseq1	5s_expressed	38872084	38872202	-	119	58
5Sseq1	5s_expressed	38872261	38872379	-	119	58
5Sseq1	5s_expressed	38872438	38872556	-	119	58
5Sseq1	5s_expressed	38872615	38872733	-	119	58
5Sseq1	5s_expressed	38872792	38872910	-	119	58
5Sseq1	5s_expressed	38872969	38873087	-	119	58
5Sseq1	5s_expressed	38873146	38873264	-	119	58
5Sseq1	5s_expressed	38873323	38873441	-	119	58
5Sseq1	5s_expressed	38873500	38873618	-	119	58
5Sseq1	5s_expressed	38873677	38873795	-	119	58
5Sseq1	5s_expressed	38873854	38873972	-	119	58
5Sseq1	5s_expressed	38874031	38874149	-	119	58
5Sseq1	5s_expressed	38874208	38874326	-	119	58
5Sseq1	5s_expressed	38874385	38874503	-	119	58
5Sseq1	5s_expressed	38874562	38874680	-	119	58
5Sseq1	5s_expressed	38874739	38874857	-	119	58
5Sseq1	5s_expressed	38874916	38875034	-	119	58
5Sseq1	5s_expressed	38875093	38875211	-	119	58
5Sseq1	5s_expressed	38875270	38875388	-	119	58
5Sseq1	5s_expressed	38875447	38875565	-	119	58
5Sseq1	5s_expressed	38875624	38875742	-	119	58
5Sseq1	5s_expressed	38875801	38875919	-	119	58
5Sseq1	5s_expressed	38875978	38876096	-	119	58
5Sseq1	5s_expressed	38876155	38876273	-	119	58
5Sseq1	5s_expressed	38876332	38876450	-	119	58
5Sseq1	5s_expressed	38876509	38876627	-	119	58
5Sseq1	5s_expressed	38876686	38876804	-	119	58
5Sseq1	5s_expressed	38876863	38876981	-	119	58
5Sseq1	5s_expressed	38877040	38877158	-	119	58
5Sseq1	5s_expressed	38877217	38877335	-	119	58
5Sseq17	5s_expressed	38877394	38877512	-	119	58
5Sseq34	5s_expressed	38877571	38877689	-	119	58
5Sseq1	5s_expressed	38877748	38877866	-	119	58
5Sseq1	5s_expressed	38877925	38878043	-	119	58
5Sseq34	5s_expressed	38878102	38878220	-	119	58
5Sseq1	5s_expressed	38878279	38878397	-	119	58
5SNONexpr	5s_nonexpressed	38878456	38878574	-	119	58
5Sseq35	5s_expressed	38878633	38878751	-	119	58
5Sseq1	5s_expressed	38878810	38878928	-	119	58
5Sseq1	5s_expressed	38878987	38879105	-	119	58
5SNONexpr	5s_nonexpressed	38879164	38879283	-	120	58
5Sseq1	5s_expressed	38879343	38879461	-	119	59
5Sseq1	5s_expressed	38879520	38879638	-	119	58
5Sseq9	5s_expressed	38879697	38879815	-	119	58
5Sseq1	5s_expressed	38879874	38879992	-	119	58
MutsuDr 5	LINE	38880149	38885793	-	5645	156
5Sseq1	5s_expressed	38885874	38885992	-	119	80
5Sseq1	5s_expressed	38886051	38886169	-	119	58
5Sseq36	5s_expressed	38886228	38886346	-	119	58
5Sseq1	5s_expressed	38886405	38886523	-	119	58
5SNONexpr	5s_nonexpressed	38886582	38886681	-	100	58
MutsuDr 1	LINE	38886682	38892228	-	5547	0
5SNONexpr	5s_nonexpressed	38892427	38892545	-	119	198
5Sseq37	5s_expressed	38892725	38892843	-	119	179
5SNONexpr	5s_nonexpressed	38893023	38893141	-	119	179
5Sseq37	5s_expressed	38893321	38893439	-	119	179
5SNONexpr	5s_nonexpressed	38893619	38893737	-	119	179
5Sseq37	5s_expressed	38893917	38894035	-	119	179
5SNONexpr	5s_nonexpressed	38894215	38894333	-	119	179
5Sseq37	5s_expressed	38894513	38894631	-	119	179
5Sseq37	5s_expressed	38894811	38894929	-	119	179
5SNONexpr	5s_nonexpressed	38895108	38895226	-	119	178
5Sseq37	5s_expressed	38895406	38895524	-	119	179
5SNONexpr	5s_nonexpressed	38895703	38895800	-	98	178
MutsuDr 4	LINE	38895801	38901324	-	5524	0
5SNONexpr	5s_nonexpressed	39121518	39121622	-	105	220193
5SNONexpr	5s_nonexpressed	39176168	39176285	-	118	54545
MutsuDr 2	LINE inc	39214652	39218117	-	3466	38366
5SNONexpr	5s_nonexpressed	39297145	39297268	+	124	79027
MutsuDr 4	LINE	39698233	39703787	-	5555	400964
5SNONexpr	5s_nonexpressed	39703867	39703985	-	119	79
5Sseq31	5s_expressed	39704044	39704162	-	119	58
5Sseq31	5s_expressed	39704221	39704339	-	119	58
5SNONexpr	5s_nonexpressed	39704398	39704516	-	119	58
5Sseq31	5s_expressed	39704575	39704693	-	119	58
5Sseq31	5s_expressed	39704752	39704870	-	119	58
5SNONexpr	5s_nonexpressed	39704929	39705047	-	119	58
5Sseq31	5s_expressed	39705106	39705224	-	119	58
5Sseq31	5s_expressed	39705283	39705401	-	119	58
5Sseq31	5s_expressed	39705460	39705578	-	119	58
5Sseq31	5s_expressed	39705637	39705755	-	119	58
5Sseq31	5s_expressed	39705814	39705932	-	119	58
5Sseq31	5s_expressed	39705991	39706109	-	119	58
5SNONexpr	5s_nonexpressed	39706168	39706286	-	119	58
5Sseq31	5s_expressed	39706345	39706463	-	119	58
5Sseq31	5s_expressed	39706522	39706640	-	119	58
5Sseq31	5s_expressed	39706699	39706817	-	119	58
5Sseq31	5s_expressed	39706876	39706994	-	119	58
5Sseq31	5s_expressed	39707053	39707171	-	119	58
5Sseq31	5s_expressed	39707230	39707348	-	119	58
5Sseq31	5s_expressed	39707407	39707525	-	119	58
5Sseq31	5s_expressed	39707584	39707702	-	119	58
5Sseq31	5s_expressed	39707761	39707879	-	119	58
5Sseq31	5s_expressed	39707938	39708056	-	119	58
5Sseq31	5s_expressed	39708115	39708233	-	119	58
5Sseq31	5s_expressed	39708292	39708410	-	119	58
5Sseq31	5s_expressed	39708469	39708587	-	119	58
5Sseq31	5s_expressed	39708646	39708764	-	119	58
5Sseq31	5s_expressed	39708823	39708941	-	119	58
5Sseq31	5s_expressed	39709000	39709118	-	119	58
5Sseq31	5s_expressed	39709177	39709295	-	119	58
5Sseq31	5s_expressed	39709354	39709472	-	119	58
5Sseq31	5s_expressed	39709531	39709649	-	119	58
5Sseq31	5s_expressed	39709708	39709826	-	119	58
5Sseq31	5s_expressed	39709885	39710003	-	119	58
5Sseq31	5s_expressed	39710062	39710180	-	119	58
5Sseq31	5s_expressed	39710239	39710357	-	119	58
5Sseq31	5s_expressed	39710416	39710534	-	119	58
5Sseq31	5s_expressed	39710593	39710711	-	119	58
5Sseq31	5s_expressed	39710770	39710888	-	119	58
5Sseq31	5s_expressed	39710947	39711065	-	119	58
5Sseq31	5s_expressed	39711124	39711242	-	119	58
MutsuDr 3	LINE	39711399	39716101	-	4703	156
5SNONexpr	5s_nonexpressed	39904846	39904960	-	115	188744
5SNONexpr	5s_nonexpressed	40073673	40073795	+	123	168712
5Sseq38	5s_expressed	40203038	40203155	-	118	129242
MutsuDr 6	LINE	41341190	41346681	-	5492	1138034
5Sseq1	5s_expressed	41346760	41346878	-	119	78
5Sseq1	5s_expressed	41346937	41347055	-	119	58
5Sseq1	5s_expressed	41347114	41347232	-	119	58
5SNONexpr	5s_nonexpressed	41347291	41347406	-	116	58
5Sseq1	5s_expressed	41347468	41347586	-	119	61
5Sseq1	5s_expressed	41347645	41347763	-	119	58
5Sseq1	5s_expressed	41347822	41347940	-	119	58
5Sseq1	5s_expressed	41347999	41348117	-	119	58
5Sseq1	5s_expressed	41348176	41348294	-	119	58
5Sseq1	5s_expressed	41348353	41348471	-	119	58
5Sseq1	5s_expressed	41348530	41348648	-	119	58
5SNONexpr	5s_nonexpressed	41348707	41348822	-	116	58
5Sseq1	5s_expressed	41348884	41349002	-	119	61
5Sseq1	5s_expressed	41349061	41349179	-	119	58
5Sseq1	5s_expressed	41349238	41349356	-	119	58
5Sseq1	5s_expressed	41349415	41349533	-	119	58
5Sseq1	5s_expressed	41349592	41349710	-	119	58
5SNONexpr	5s_nonexpressed	41349769	41349884	-	116	58
5Sseq1	5s_expressed	41349946	41350064	-	119	61
5Sseq1	5s_expressed	41350123	41350241	-	119	58
5Sseq1	5s_expressed	41350300	41350418	-	119	58
5Sseq1	5s_expressed	41350477	41350595	-	119	58
5Sseq1	5s_expressed	41350654	41350772	-	119	58
5Sseq1	5s_expressed	41350831	41350949	-	119	58
5Sseq1	5s_expressed	41351008	41351126	-	119	58
5Sseq1	5s_expressed	41351185	41351303	-	119	58
5Sseq1	5s_expressed	41351362	41351480	-	119	58
5Sseq1	5s_expressed	41351539	41351657	-	119	58
5Sseq1	5s_expressed	41351750	41351868	-	119	92
5SNONexpr	5s_nonexpressed	41351927	41352045	-	119	58
5Sseq1	5s_expressed	41352099	41352217	-	119	53
5Sseq1	5s_expressed	41352276	41352394	-	119	58
5Sseq1	5s_expressed	41352453	41352571	-	119	58
5Sseq1	5s_expressed	41352630	41352748	-	119	58
5Sseq1	5s_expressed	41352807	41352925	-	119	58
5SNONexpr	5s_nonexpressed	41352984	41353099	-	116	58
5SNONexpr	5s_nonexpressed	41353161	41353260	-	100	61
MutsuDr 1	LINE	41353261	41358815	-	5555	0
MutsuDr 3	LINE inc	41703370	41706974	+	3605	344554
5SNONexpr	5s_nonexpressed	41706975	41707073	+	99	0
5SNONexpr	5s_nonexpressed	41707132	41707250	+	119	58
5SNONexpr	5s_nonexpressed	41707309	41707427	+	119	58
5SNONexpr	5s_nonexpressed	41707487	41707604	+	118	59
5Sseq1	5s_expressed	41707663	41707781	+	119	58
5Sseq1	5s_expressed	41707840	41707958	+	119	58
5Sseq1	5s_expressed	41708017	41708135	+	119	58
5Sseq1	5s_expressed	41708194	41708312	+	119	58
5Sseq40	5s_expressed	41708372	41708489	+	118	59
5Sseq1	5s_expressed	41708548	41708666	+	119	58
5Sseq1	5s_expressed	41708725	41708843	+	119	58
5SNONexpr	5s_nonexpressed	41708996	41709114	+	119	152
5Sseq1	5s_expressed	41709173	41709291	+	119	58
5Sseq1	5s_expressed	41709350	41709468	+	119	58
5Sseq1	5s_expressed	41709527	41709645	+	119	58
5Sseq1	5s_expressed	41709704	41709822	+	119	58
5Sseq1	5s_expressed	41709881	41709999	+	119	58
5Sseq1	5s_expressed	41710058	41710176	+	119	58
5Sseq1	5s_expressed	41710299	41710417	+	119	122
5Sseq1	5s_expressed	41710476	41710594	+	119	58
5SNONexpr	5s_nonexpressed	41710654	41710771	+	118	59
5SNONexpr	5s_nonexpressed	41710830	41710934	+	105	58
5SNONexpr	5s_nonexpressed	41711254	41711366	+	113	319
5SNONexpr	5s_nonexpressed	41711425	41711543	+	119	58
5Sseq19	5s_expressed	41711602	41711720	+	119	58
5Sseq1	5s_expressed	41711779	41711897	+	119	58
5Sseq1	5s_expressed	41711956	41712074	+	119	58
5Sseq1	5s_expressed	41712133	41712251	+	119	58
5SNONexpr	5s_nonexpressed	41712310	41712428	+	119	58
5Sseq1	5s_expressed	41712632	41712750	+	119	203
5Sseq40	5s_expressed	41712810	41712927	+	118	59
5Sseq1	5s_expressed	41712986	41713104	+	119	58
5Sseq1	5s_expressed	41713163	41713281	+	119	58
5Sseq1	5s_expressed	41713340	41713458	+	119	58
5Sseq1	5s_expressed	41713517	41713635	+	119	58
5Sseq36	5s_expressed	41713694	41713812	+	119	58
5Sseq1	5s_expressed	41713871	41713989	+	119	58
5Sseq1	5s_expressed	41714048	41714166	+	119	58
5Sseq1	5s_expressed	41714225	41714343	+	119	58
5Sseq1	5s_expressed	41714402	41714520	+	119	58
5SNONexpr	5s_nonexpressed	41714579	41714697	+	119	58
5SNONexpr	5s_nonexpressed	41714757	41714874	+	118	59
5Sseq1	5s_expressed	41714933	41715051	+	119	58
5Sseq1	5s_expressed	41715110	41715228	+	119	58
5Sseq1	5s_expressed	41715287	41715405	+	119	58
5SNONexpr	5s_nonexpressed	41715465	41715582	+	118	59
5Sseq1	5s_expressed	41715641	41715759	+	119	58
5Sseq1	5s_expressed	41715818	41715936	+	119	58
5Sseq1	5s_expressed	41716060	41716178	+	119	123
5Sseq1	5s_expressed	41716237	41716355	+	119	58
5Sseq36	5s_expressed	41716414	41716532	+	119	58
5Sseq1	5s_expressed	41716591	41716709	+	119	58
5Sseq1	5s_expressed	41716768	41716886	+	119	58
5Sseq1	5s_expressed	41716945	41717063	+	119	58
5Sseq40	5s_expressed	41717123	41717240	+	118	59
5Sseq1	5s_expressed	41717299	41717417	+	119	58
5Sseq1	5s_expressed	41717595	41717713	+	119	177
5Sseq1	5s_expressed	41717772	41717890	+	119	58
5SNONexpr	5s_nonexpressed	41717950	41718067	+	118	59
5SNONexpr	5s_nonexpressed	41718126	41718244	+	119	58
5Sseq1	5s_expressed	41718303	41718421	+	119	58
5Sseq1	5s_expressed	41718480	41718598	+	119	58
5Sseq1	5s_expressed	41718657	41718775	+	119	58
5Sseq40	5s_expressed	41718835	41718952	+	118	59
5Sseq1	5s_expressed	41719011	41719129	+	119	58
5Sseq1	5s_expressed	41719188	41719306	+	119	58
5Sseq1	5s_expressed	41719365	41719483	+	119	58
5Sseq1	5s_expressed	41719542	41719660	+	119	58
5Sseq1	5s_expressed	41719719	41719837	+	119	58
5Sseq1	5s_expressed	41719896	41720014	+	119	58
5Sseq41	5s_expressed	41720073	41720191	+	119	58
5SNONexpr	5s_nonexpressed	41720250	41720368	+	119	58
5Sseq36	5s_expressed	41720427	41720545	+	119	58
5SNONexpr	5s_nonexpressed	41720675	41720791	+	117	129
5Sseq1	5s_expressed	41720850	41720968	+	119	58
5Sseq1	5s_expressed	41721027	41721145	+	119	58
5Sseq1	5s_expressed	41721204	41721322	+	119	58
5Sseq1	5s_expressed	41721381	41721499	+	119	58
5Sseq1	5s_expressed	41721558	41721676	+	119	58
5Sseq1	5s_expressed	41721735	41721853	+	119	58
5Sseq40	5s_expressed	41721913	41722030	+	118	59
5Sseq1	5s_expressed	41722089	41722207	+	119	58
5Sseq1	5s_expressed	41722266	41722384	+	119	58
MutsuDr 2	LINE	42201930	42207483	+	5554	479545
5Sseq1	5s_expressed	42207950	42208068	+	119	466
5Sseq1	5s_expressed	42208427	42208545	+	119	358
5Sseq1	5s_expressed	42208604	42208722	+	119	58
5SNONexpr	5s_nonexpressed	43252297	43252415	+	119	1043574
5SNONexpr	5s_nonexpressed	43252474	43252592	+	119	58
5Sseq10	5s_expressed	43252651	43252769	+	119	58
5SNONexpr	5s_nonexpressed	43252828	43252946	+	119	58
5Sseq1	5s_expressed	43253005	43253123	+	119	58
5SNONexpr	5s_nonexpressed	43253182	43253300	+	119	58
5SNONexpr	5s_nonexpressed	43253359	43253477	+	119	58
5SNONexpr	5s_nonexpressed	43253536	43253654	+	119	58
MutsuDr 7	LINE	43253713	43258741	+	5029	58
5SNONexpr	5s_nonexpressed	43258742	43258840	+	99	0
5Sseq1	5s_expressed	43259019	43259137	+	119	178
MutsuDr 4	LINE	43259337	43264934	+	5598	199
MutsuDr 4	LINE	43265275	43270818	+	5544	340
5SNONexpr	5s_nonexpressed	43589230	43589329	-	100	318411
MutsuDr 1	LINE inc	43589330	43593324	-	3995	0
5SNONexpr	5s_nonexpressed	43594205	43594323	-	119	880
5SNONexpr	5s_nonexpressed	43607211	43607326	+	116	12887
5Sseq1	5s_expressed	43607388	43607506	+	119	61
5Sseq1	5s_expressed	43607565	43607683	+	119	58
5Sseq1	5s_expressed	43607742	43607860	+	119	58
5Sseq1	5s_expressed	43607919	43608037	+	119	58
5Sseq1	5s_expressed	43608096	43608214	+	119	58
5Sseq1	5s_expressed	43608273	43608391	+	119	58
5Sseq1	5s_expressed	43608450	43608568	+	119	58
5Sseq1	5s_expressed	43608627	43608745	+	119	58
5Sseq1	5s_expressed	43608804	43608922	+	119	58
5Sseq1	5s_expressed	43608981	43609099	+	119	58
5Sseq43	5s_expressed	43609158	43609276	+	119	58
5Sseq1	5s_expressed	43609335	43609453	+	119	58
5Sseq1	5s_expressed	43609512	43609630	+	119	58
5Sseq1	5s_expressed	43609689	43609807	+	119	58
5Sseq1	5s_expressed	43609866	43609984	+	119	58
5Sseq1	5s_expressed	43610043	43610161	+	119	58
5Sseq1	5s_expressed	43610220	43610338	+	119	58
5Sseq1	5s_expressed	43610397	43610515	+	119	58
5Sseq1	5s_expressed	43610574	43610692	+	119	58
5Sseq1	5s_expressed	43610751	43610869	+	119	58
5Sseq43	5s_expressed	43610928	43611046	+	119	58
5Sseq1	5s_expressed	43611105	43611223	+	119	58
5Sseq43	5s_expressed	43611282	43611400	+	119	58
5Sseq1	5s_expressed	43611459	43611577	+	119	58
5Sseq1	5s_expressed	43611636	43611754	+	119	58
5Sseq1	5s_expressed	43611813	43611931	+	119	58
5Sseq1	5s_expressed	43611990	43612108	+	119	58
5Sseq1	5s_expressed	43612167	43612285	+	119	58
5Sseq1	5s_expressed	43612344	43612462	+	119	58
5SNONexpr	5s_nonexpressed	43736044	43736158	+	115	123581
MutsuDr 1	LINE	43767934	43773510	-	5577	31775
5Sseq1	5s_expressed	43773588	43773706	-	119	77
5Sseq1	5s_expressed	43773765	43773883	-	119	58
5Sseq1	5s_expressed	43773942	43774060	-	119	58
5Sseq1	5s_expressed	43774119	43774237	-	119	58
5Sseq1	5s_expressed	43774296	43774414	-	119	58
5Sseq1	5s_expressed	43774473	43774591	-	119	58
5Sseq1	5s_expressed	43774650	43774768	-	119	58
5Sseq1	5s_expressed	43774827	43774945	-	119	58
5Sseq1	5s_expressed	43775004	43775122	-	119	58
5Sseq1	5s_expressed	43775181	43775299	-	119	58
5Sseq1	5s_expressed	43775358	43775476	-	119	58
5Sseq44	5s_expressed	43775535	43775653	-	119	58
5SNONexpr	5s_nonexpressed	43775712	43775830	-	119	58
5Sseq1	5s_expressed	43775889	43776007	-	119	58
5Sseq1	5s_expressed	43776066	43776184	-	119	58
5Sseq1	5s_expressed	43776243	43776361	-	119	58
5Sseq1	5s_expressed	43776420	43776538	-	119	58
5Sseq1	5s_expressed	43776597	43776715	-	119	58
5SNONexpr	5s_nonexpressed	43776774	43776892	-	119	58
5SNONexpr	5s_nonexpressed	43776951	43777069	-	119	58
5Sseq1	5s_expressed	43777128	43777246	-	119	58
5Sseq1	5s_expressed	43777305	43777423	-	119	58
5SNONexpr	5s_nonexpressed	43777482	43777600	-	119	58
5Sseq1	5s_expressed	43777659	43777777	-	119	58
5Sseq1	5s_expressed	43777836	43777954	-	119	58
5Sseq1	5s_expressed	43778013	43778131	-	119	58
5Sseq1	5s_expressed	43778190	43778308	-	119	58
5Sseq1	5s_expressed	43778367	43778485	-	119	58
5SNONexpr	5s_nonexpressed	43778544	43778662	-	119	58
MutsuDr 5	LINE	43778819	43784461	-	5643	156
5SNONexpr	5s_nonexpressed	43830615	43830730	-	116	46153
5Sseq1	5s_expressed	44439261	44439379	-	119	608530
5Sseq1	5s_expressed	45132688	45132806	+	119	693308
5Sseq7	5s_expressed	45132986	45133104	+	119	179
5Sseq1	5s_expressed	45133284	45133402	+	119	179
MutsuDr 4	LINE	45133603	45139163	+	5561	200
5Sseq45	5s_expressed	45139320	45139438	+	119	156
5SNONexpr	5s_nonexpressed	45139497	45139614	+	118	58
5SNONexpr	5s_nonexpressed	45139673	45139791	+	119	58
5Sseq1	5s_expressed	45139850	45139968	+	119	58
5SNONexpr	5s_nonexpressed	45140027	45140145	+	119	58
5Sseq1	5s_expressed	45140204	45140322	+	119	58
5Sseq1	5s_expressed	45140381	45140499	+	119	58
5Sseq1	5s_expressed	45140558	45140676	+	119	58
5SNONexpr	5s_nonexpressed	45140735	45140853	+	119	58
5Sseq1	5s_expressed	45140912	45141030	+	119	58
5Sseq46	5s_expressed	45141089	45141207	+	119	58
5Sseq1	5s_expressed	45141266	45141384	+	119	58
5Sseq1	5s_expressed	45141443	45141561	+	119	58
5SNONexpr	5s_nonexpressed	45141620	45141738	+	119	58
5Sseq47	5s_expressed	45141797	45141915	+	119	58
5Sseq13	5s_expressed	45141974	45142092	+	119	58
5Sseq26	5s_expressed	45142151	45142269	+	119	58
MutsuDr 7	LINE	45142349	45147802	+	5454	79
5SNONexpr	5s_nonexpressed	45303468	45303583	+	116	155665
5SNONexpr	5s_nonexpressed	45994488	45994601	+	114	690904
5SNONexpr	5s_nonexpressed	46266188	46266305	+	118	271586
5SNONexpr	5s_nonexpressed	46324441	46324554	+	114	58135
5SNONexpr	5s_nonexpressed	46363519	46363625	-	107	38964
MutsuDr 1	LINE inc	46740847	46744084	-	3238	377221
5SNONexpr	5s_nonexpressed	46744085	46744183	-	99	0
MutsuDr 7	LINE	46744184	46749626	-	5443	0
5SNONexpr	5s_nonexpressed	46749826	46749944	-	119	199
MutsuDr 2	LINE inc	46750222	46753633	-	3412	277
5SNONexpr	5s_nonexpressed	47345749	47345853	-	105	592115
MutsuDr 2	LINE	47486119	47491293	-	5175	140265
MutsuDr 7	LINE inc	47516839	47519923	-	3085	25545
5SNONexpr	5s_nonexpressed	47520003	47520115	-	113	79
MutsuDr 6	LINE	47520102	47525636	-	5535	-14
5SNONexpr	5s_nonexpressed	47525715	47525833	-	119	78
5SNONexpr	5s_nonexpressed	47525892	47526010	-	119	58
5Sseq1	5s_expressed	47526069	47526187	-	119	58
5SNONexpr	5s_nonexpressed	47526246	47526364	-	119	58
5SNONexpr	5s_nonexpressed	47526423	47526541	-	119	58
5SNONexpr	5s_nonexpressed	47526600	47526718	-	119	58
5Sseq1	5s_expressed	47526777	47526895	-	119	58
5SNONexpr	5s_nonexpressed	47526954	47527072	-	119	58
5SNONexpr	5s_nonexpressed	47527131	47527249	-	119	58
5SNONexpr	5s_nonexpressed	47527308	47527426	-	119	58
5Sseq1	5s_expressed	47527485	47527603	-	119	58
5Sseq1	5s_expressed	47527662	47527780	-	119	58
5SNONexpr	5s_nonexpressed	47527839	47527957	-	119	58
5Sseq1	5s_expressed	47528016	47528134	-	119	58
5SNONexpr	5s_nonexpressed	47528193	47528311	-	119	58
5Sseq27	5s_expressed	47528370	47528488	-	119	58
5Sseq1	5s_expressed	47528547	47528665	-	119	58
5Sseq1	5s_expressed	47528724	47528842	-	119	58
5Sseq1	5s_expressed	47528901	47529019	-	119	58
5SNONexpr	5s_nonexpressed	47529078	47529196	-	119	58
5Sseq1	5s_expressed	47529255	47529373	-	119	58
5SNONexpr	5s_nonexpressed	47529432	47529550	-	119	58
5SNONexpr	5s_nonexpressed	47529609	47529727	-	119	58
5Sseq1	5s_expressed	47529786	47529904	-	119	58
5Sseq1	5s_expressed	47529963	47530081	-	119	58
5Sseq1	5s_expressed	47530140	47530258	-	119	58
5Sseq1	5s_expressed	47530317	47530435	-	119	58
5SNONexpr	5s_nonexpressed	47530494	47530612	-	119	58
5SNONexpr	5s_nonexpressed	47530671	47530789	-	119	58
5SNONexpr	5s_nonexpressed	47530848	47530966	-	119	58
5Sseq1	5s_expressed	47531025	47531143	-	119	58
5Sseq1	5s_expressed	47531202	47531320	-	119	58
5Sseq1	5s_expressed	47531379	47531497	-	119	58
5Sseq1	5s_expressed	47531556	47531674	-	119	58
5SNONexpr	5s_nonexpressed	47531733	47531851	-	119	58
5SNONexpr	5s_nonexpressed	47531910	47532028	-	119	58
5Sseq1	5s_expressed	47532087	47532205	-	119	58
5SNONexpr	5s_nonexpressed	47532264	47532382	-	119	58
5SNONexpr	5s_nonexpressed	47532441	47532559	-	119	58
5Sseq1	5s_expressed	47532618	47532736	-	119	58
5SNONexpr	5s_nonexpressed	47532795	47532913	-	119	58
5SNONexpr	5s_nonexpressed	47532972	47533090	-	119	58
5Sseq1	5s_expressed	47533149	47533267	-	119	58
5SNONexpr	5s_nonexpressed	47533326	47533444	-	119	58
5SNONexpr	5s_nonexpressed	47533503	47533621	-	119	58
5Sseq1	5s_expressed	47533680	47533798	-	119	58
5SNONexpr	5s_nonexpressed	47533857	47533975	-	119	58
5SNONexpr	5s_nonexpressed	47534034	47534152	-	119	58
5Sseq1	5s_expressed	47534211	47534329	-	119	58
5SNONexpr	5s_nonexpressed	47534388	47534506	-	119	58
5SNONexpr	5s_nonexpressed	47534565	47534683	-	119	58
5Sseq1	5s_expressed	47534742	47534860	-	119	58
5SNONexpr	5s_nonexpressed	47534919	47535037	-	119	58
5SNONexpr	5s_nonexpressed	47535096	47535214	-	119	58
5Sseq1	5s_expressed	47535273	47535391	-	119	58
5SNONexpr	5s_nonexpressed	47535450	47535568	-	119	58
5SNONexpr	5s_nonexpressed	47535627	47535745	-	119	58
5Sseq1	5s_expressed	47535804	47535922	-	119	58
5SNONexpr	5s_nonexpressed	47535981	47536099	-	119	58
5SNONexpr	5s_nonexpressed	47536158	47536276	-	119	58
5Sseq48	5s_expressed	47536335	47536453	-	119	58
5Sseq1	5s_expressed	47545806	47545924	-	119	9352
5Sseq1	5s_expressed	47545983	47546101	-	119	58
5SNONexpr	5s_nonexpressed	47546160	47546278	-	119	58
5Sseq1	5s_expressed	47546337	47546455	-	119	58
5SNONexpr	5s_nonexpressed	47546514	47546632	-	119	58
5SNONexpr	5s_nonexpressed	47546691	47546809	-	119	58
5Sseq1	5s_expressed	47546868	47546986	-	119	58
5SNONexpr	5s_nonexpressed	47547045	47547163	-	119	58
5SNONexpr	5s_nonexpressed	47547222	47547340	-	119	58
5Sseq1	5s_expressed	47547399	47547517	-	119	58
5SNONexpr	5s_nonexpressed	47547576	47547694	-	119	58
5SNONexpr	5s_nonexpressed	47547753	47547871	-	119	58
5Sseq1	5s_expressed	47547930	47548048	-	119	58
5SNONexpr	5s_nonexpressed	47548107	47548225	-	119	58
5SNONexpr	5s_nonexpressed	47548284	47548402	-	119	58
5Sseq1	5s_expressed	47548461	47548579	-	119	58
5SNONexpr	5s_nonexpressed	47548638	47548756	-	119	58
5SNONexpr	5s_nonexpressed	47548815	47548933	-	119	58
5Sseq1	5s_expressed	47548992	47549110	-	119	58
5SNONexpr	5s_nonexpressed	47549169	47549287	-	119	58
5SNONexpr	5s_nonexpressed	47549346	47549464	-	119	58
5Sseq1	5s_expressed	47549523	47549641	-	119	58
5SNONexpr	5s_nonexpressed	47549700	47549818	-	119	58
5SNONexpr	5s_nonexpressed	47549877	47549995	-	119	58
5Sseq1	5s_expressed	47550054	47550172	-	119	58
5SNONexpr	5s_nonexpressed	47550231	47550349	-	119	58
5SNONexpr	5s_nonexpressed	47550408	47550526	-	119	58
5SNONexpr	5s_nonexpressed	47550585	47550703	-	119	58
5Sseq1	5s_expressed	47550762	47550880	-	119	58
5SNONexpr	5s_nonexpressed	47550939	47551057	-	119	58
5SNONexpr	5s_nonexpressed	47551116	47551234	-	119	58
5Sseq1	5s_expressed	47551293	47551411	-	119	58
5Sseq1	5s_expressed	47551470	47551588	-	119	58
MutsuDr 3	LINE	47551745	47557267	-	5523	156
5Sseq1	5s_expressed	47557347	47557465	-	119	79
5SNONexpr	5s_nonexpressed	47557524	47557642	-	119	58
5SNONexpr	5s_nonexpressed	47557701	47557819	-	119	58
5Sseq1	5s_expressed	47557878	47557996	-	119	58
5SNONexpr	5s_nonexpressed	47558055	47558173	-	119	58
5SNONexpr	5s_nonexpressed	47558232	47558350	-	119	58
5Sseq1	5s_expressed	47558409	47558527	-	119	58
5SNONexpr	5s_nonexpressed	47558586	47558704	-	119	58
5SNONexpr	5s_nonexpressed	47558763	47558881	-	119	58
5Sseq1	5s_expressed	47558940	47559058	-	119	58
5SNONexpr	5s_nonexpressed	47559117	47559235	-	119	58
5SNONexpr	5s_nonexpressed	47559294	47559412	-	119	58
5Sseq1	5s_expressed	47559471	47559589	-	119	58
5SNONexpr	5s_nonexpressed	47559648	47559766	-	119	58
5SNONexpr	5s_nonexpressed	47559825	47559943	-	119	58
5Sseq1	5s_expressed	47560002	47560120	-	119	58
5SNONexpr	5s_nonexpressed	47560179	47560297	-	119	58
5SNONexpr	5s_nonexpressed	47560356	47560474	-	119	58
5Sseq1	5s_expressed	47560533	47560651	-	119	58
5SNONexpr	5s_nonexpressed	47560710	47560828	-	119	58
5SNONexpr	5s_nonexpressed	47560887	47561005	-	119	58
5Sseq1	5s_expressed	47561064	47561182	-	119	58
5SNONexpr	5s_nonexpressed	47561241	47561359	-	119	58
5SNONexpr	5s_nonexpressed	47561418	47561536	-	119	58
5Sseq1	5s_expressed	47561595	47561713	-	119	58
5SNONexpr	5s_nonexpressed	47561772	47561890	-	119	58
5SNONexpr	5s_nonexpressed	47561949	47562067	-	119	58
5Sseq1	5s_expressed	47562126	47562244	-	119	58
5SNONexpr	5s_nonexpressed	47562303	47562421	-	119	58
5SNONexpr	5s_nonexpressed	47562480	47562598	-	119	58
5Sseq1	5s_expressed	47562657	47562775	-	119	58
5SNONexpr	5s_nonexpressed	47562834	47562952	-	119	58
5SNONexpr	5s_nonexpressed	47563011	47563129	-	119	58
5Sseq1	5s_expressed	47563188	47563306	-	119	58
5SNONexpr	5s_nonexpressed	47563365	47563483	-	119	58
5SNONexpr	5s_nonexpressed	47563542	47563660	-	119	58
5Sseq1	5s_expressed	47563719	47563837	-	119	58
5SNONexpr	5s_nonexpressed	47563896	47564014	-	119	58
5SNONexpr	5s_nonexpressed	47564073	47564191	-	119	58
5Sseq1	5s_expressed	47564250	47564368	-	119	58
5SNONexpr	5s_nonexpressed	47564427	47564545	-	119	58
5SNONexpr	5s_nonexpressed	47564604	47564722	-	119	58
5Sseq1	5s_expressed	47564781	47564899	-	119	58
5SNONexpr	5s_nonexpressed	47564958	47565076	-	119	58
5SNONexpr	5s_nonexpressed	47565135	47565253	-	119	58
5Sseq1	5s_expressed	47565312	47565430	-	119	58
5SNONexpr	5s_nonexpressed	47565489	47565607	-	119	58
5SNONexpr	5s_nonexpressed	47565666	47565784	-	119	58
5Sseq1	5s_expressed	47565843	47565961	-	119	58
5SNONexpr	5s_nonexpressed	47566020	47566138	-	119	58
5SNONexpr	5s_nonexpressed	47566197	47566315	-	119	58
5Sseq1	5s_expressed	47566374	47566492	-	119	58
5SNONexpr	5s_nonexpressed	47566551	47566669	-	119	58
5SNONexpr	5s_nonexpressed	47566728	47566846	-	119	58
5Sseq1	5s_expressed	47566905	47567023	-	119	58
5SNONexpr	5s_nonexpressed	47567082	47567200	-	119	58
5SNONexpr	5s_nonexpressed	47567259	47567377	-	119	58
5Sseq1	5s_expressed	47567436	47567554	-	119	58
5SNONexpr	5s_nonexpressed	47567613	47567731	-	119	58
5SNONexpr	5s_nonexpressed	47567790	47567908	-	119	58
5Sseq1	5s_expressed	47567967	47568085	-	119	58
5SNONexpr	5s_nonexpressed	47568144	47568262	-	119	58
5SNONexpr	5s_nonexpressed	47568321	47568439	-	119	58
5Sseq1	5s_expressed	47568498	47568616	-	119	58
5SNONexpr	5s_nonexpressed	47568675	47568793	-	119	58
5SNONexpr	5s_nonexpressed	47568852	47568970	-	119	58
5Sseq1	5s_expressed	47569029	47569147	-	119	58
5SNONexpr	5s_nonexpressed	47569206	47569324	-	119	58
5SNONexpr	5s_nonexpressed	47569383	47569501	-	119	58
5Sseq1	5s_expressed	47569560	47569678	-	119	58
5SNONexpr	5s_nonexpressed	47569737	47569855	-	119	58
5SNONexpr	5s_nonexpressed	47569914	47570032	-	119	58
5Sseq1	5s_expressed	47570091	47570209	-	119	58
5SNONexpr	5s_nonexpressed	47570268	47570386	-	119	58
5SNONexpr	5s_nonexpressed	47570445	47570563	-	119	58
5Sseq1	5s_expressed	47570622	47570740	-	119	58
5SNONexpr	5s_nonexpressed	47570799	47570917	-	119	58
5SNONexpr	5s_nonexpressed	47570976	47571094	-	119	58
5Sseq1	5s_expressed	47571153	47571271	-	119	58
5SNONexpr	5s_nonexpressed	47571330	47571448	-	119	58
5SNONexpr	5s_nonexpressed	47571507	47571625	-	119	58
5SNONexpr	5s_nonexpressed	47571684	47571802	-	119	58
5Sseq1	5s_expressed	47571861	47571979	-	119	58
5Sseq1	5s_expressed	47572038	47572156	-	119	58
5Sseq1	5s_expressed	47572215	47572333	-	119	58
5SNONexpr	5s_nonexpressed	47572392	47572510	-	119	58
5Sseq1	5s_expressed	47572569	47572687	-	119	58
5SNONexpr	5s_nonexpressed	47572746	47572864	-	119	58
5SNONexpr	5s_nonexpressed	47572923	47573041	-	119	58
5Sseq1	5s_expressed	47573100	47573218	-	119	58
5SNONexpr	5s_nonexpressed	47573277	47573395	-	119	58
5SNONexpr	5s_nonexpressed	47573454	47573572	-	119	58
5Sseq43	5s_expressed	47573631	47573749	-	119	58
5SNONexpr	5s_nonexpressed	47573808	47573927	-	120	58
5Sseq1	5s_expressed	47573986	47574104	-	119	58
5Sseq1	5s_expressed	47574163	47574281	-	119	58
5Sseq1	5s_expressed	47574340	47574458	-	119	58
5Sseq1	5s_expressed	47574517	47574635	-	119	58
5Sseq1	5s_expressed	47574694	47574812	-	119	58
5SNONexpr	5s_nonexpressed	47574871	47574989	-	119	58
5SNONexpr	5s_nonexpressed	47575048	47575166	-	119	58
5SNONexpr	5s_nonexpressed	47575225	47575343	-	119	58
5Sseq1	5s_expressed	47575402	47575520	-	119	58
5Sseq1	5s_expressed	47575579	47575697	-	119	58
MutsuDr 5	LINE	47575854	47581427	-	5574	156
5Sseq1	5s_expressed	47581508	47581626	-	119	80
5Sseq49	5s_expressed	47581685	47581803	-	119	58
5SNONexpr	5s_nonexpressed	47581862	47581980	-	119	58
5SNONexpr	5s_nonexpressed	47582039	47582157	-	119	58
5SNONexpr	5s_nonexpressed	47582216	47582334	-	119	58
5SNONexpr	5s_nonexpressed	47582393	47582511	-	119	58
5Sseq50	5s_expressed	47582570	47582688	-	119	58
5SNONexpr	5s_nonexpressed	47582747	47582864	-	118	58
5SNONexpr	5s_nonexpressed	47582924	47583042	-	119	59
5Sseq51	5s_expressed	47583101	47583218	-	118	58
MutsuDr 7	LINE	47583281	47588719	-	5439	62
5SNONexpr	5s_nonexpressed	47588920	47589038	-	119	200
5SNONexpr	5s_nonexpressed	47589344	47589456	-	113	305
5SNONexpr	5s_nonexpressed	47677293	47677411	+	119	87836
5SNONexpr	5s_nonexpressed	47816889	47817016	+	128	139477
5SNONexpr	5s_nonexpressed	48163544	48163659	+	116	346527
5SNONexpr	5s_nonexpressed	48572099	48572217	-	119	408439
5SNONexpr	5s_nonexpressed	48627359	48627477	+	119	55141
5SNONexpr	5s_nonexpressed	49350929	49351044	+	116	723451
MutsuDr 4	LINE inc	50025943	50029790	-	3848	674898
5Sseq52	5s_expressed	50030231	50030349	-	119	440
5SNONexpr	5s_nonexpressed	50030530	50030648	-	119	180
5Sseq19	5s_expressed	50030829	50030947	-	119	180
5Sseq1	5s_expressed	50031127	50031245	-	119	179
5SNONexpr	5s_nonexpressed	50031425	50031543	-	119	179
5SNONexpr	5s_nonexpressed	50082157	50082278	+	122	50613
5SNONexpr	5s_nonexpressed	50342657	50342775	+	119	260378
5SNONexpr	5s_nonexpressed	50399716	50399831	-	116	56940
5SNONexpr	5s_nonexpressed	50516214	50516322	+	109	116382
5SNONexpr	5s_nonexpressed	51173348	51173467	+	120	657025
5SNONexpr	5s_nonexpressed	51219022	51219136	-	115	45554
5SNONexpr	5s_nonexpressed	51299287	51299404	-	118	80150
5Sseq1	5s_expressed	51477974	51478092	-	119	178569
5Sseq1	5s_expressed	51478151	51478269	-	119	58
5Sseq1	5s_expressed	51478328	51478446	-	119	58
5Sseq1	5s_expressed	51478505	51478623	-	119	58
5Sseq1	5s_expressed	51478682	51478800	-	119	58
5SNONexpr	5s_nonexpressed	51478859	51478976	-	118	58
5Sseq1	5s_expressed	51479036	51479154	-	119	59
5Sseq53	5s_expressed	51479213	51479331	-	119	58
5Sseq1	5s_expressed	51479390	51479508	-	119	58
5SNONexpr	5s_nonexpressed	51479567	51479684	-	118	58
5Sseq54	5s_expressed	51479744	51479861	-	118	59
5Sseq1	5s_expressed	51479920	51480038	-	119	58
5Sseq1	5s_expressed	51480097	51480215	-	119	58
5Sseq54	5s_expressed	51480274	51480391	-	118	58
5SNONexpr	5s_nonexpressed	51480450	51480568	-	119	58
5Sseq1	5s_expressed	51480627	51480745	-	119	58
5Sseq1	5s_expressed	51480804	51480922	-	119	58
5Sseq1	5s_expressed	51480981	51481099	-	119	58
5SNONexpr	5s_nonexpressed	51481158	51481275	-	118	58
5Sseq1	5s_expressed	51481335	51481453	-	119	59
5Sseq1	5s_expressed	51481512	51481630	-	119	58
5Sseq1	5s_expressed	51481689	51481807	-	119	58
5Sseq1	5s_expressed	51481866	51481984	-	119	58
5Sseq1	5s_expressed	51482043	51482161	-	119	58
5Sseq1	5s_expressed	51482220	51482338	-	119	58
5Sseq1	5s_expressed	51482397	51482515	-	119	58
5Sseq1	5s_expressed	51482574	51482692	-	119	58
5Sseq1	5s_expressed	51482751	51482869	-	119	58
5Sseq1	5s_expressed	51482928	51483046	-	119	58
5Sseq1	5s_expressed	51483105	51483223	-	119	58
5SNONexpr	5s_nonexpressed	51483282	51483400	-	119	58
5Sseq35	5s_expressed	51483459	51483577	-	119	58
5Sseq1	5s_expressed	51483636	51483754	-	119	58
5Sseq1	5s_expressed	51483813	51483931	-	119	58
5SNONexpr	5s_nonexpressed	51483990	51484108	-	119	58
5Sseq1	5s_expressed	51484167	51484285	-	119	58
5Sseq1	5s_expressed	51484344	51484462	-	119	58
5SNONexpr	5s_nonexpressed	51484521	51484638	-	118	58
5Sseq1	5s_expressed	51484698	51484816	-	119	59
5Sseq1	5s_expressed	51484875	51484993	-	119	58
5Sseq1	5s_expressed	51485052	51485170	-	119	58
5Sseq1	5s_expressed	51485229	51485347	-	119	58
5Sseq1	5s_expressed	51485406	51485524	-	119	58
5SNONexpr	5s_nonexpressed	51485583	51485701	-	119	58
5Sseq1	5s_expressed	51485760	51485878	-	119	58
5Sseq1	5s_expressed	51485937	51486055	-	119	58
5SNONexpr	5s_nonexpressed	51486114	51486232	-	119	58
5Sseq33	5s_expressed	51486291	51486409	-	119	58
5Sseq1	5s_expressed	51486468	51486586	-	119	58
5Sseq29	5s_expressed	51486645	51486763	-	119	58
5Sseq1	5s_expressed	51486822	51486940	-	119	58
5Sseq1	5s_expressed	51486999	51487117	-	119	58
5Sseq1	5s_expressed	51487176	51487294	-	119	58
5Sseq1	5s_expressed	51487353	51487471	-	119	58
5Sseq1	5s_expressed	51487530	51487648	-	119	58
5Sseq1	5s_expressed	51487707	51487825	-	119	58
5Sseq55	5s_expressed	51487884	51488002	-	119	58
5Sseq1	5s_expressed	51488061	51488179	-	119	58
5Sseq1	5s_expressed	51488238	51488356	-	119	58
5Sseq1	5s_expressed	51488415	51488533	-	119	58
5SNONexpr	5s_nonexpressed	51488592	51488706	-	115	58
5Sseq57	5s_expressed	51488763	51488881	-	119	56
5SNONexpr	5s_nonexpressed	51488940	51489058	-	119	58
5Sseq1	5s_expressed	51489117	51489235	-	119	58
5Sseq1	5s_expressed	51489294	51489412	-	119	58
5SNONexpr	5s_nonexpressed	51489471	51489589	-	119	58
5Sseq1	5s_expressed	51489648	51489766	-	119	58
5Sseq1	5s_expressed	51489825	51489943	-	119	58
5Sseq1	5s_expressed	51490001	51490119	-	119	57
5Sseq1	5s_expressed	51490178	51490296	-	119	58
5Sseq1	5s_expressed	51490355	51490473	-	119	58
5Sseq1	5s_expressed	51490532	51490650	-	119	58
5Sseq1	5s_expressed	51490709	51490827	-	119	58
5Sseq1	5s_expressed	51490886	51491004	-	119	58
5Sseq1	5s_expressed	51491063	51491181	-	119	58
5Sseq1	5s_expressed	51491240	51491358	-	119	58
5Sseq1	5s_expressed	51491417	51491535	-	119	58
5Sseq1	5s_expressed	51491594	51491712	-	119	58
5SNONexpr	5s_nonexpressed	51491771	51491888	-	118	58
5Sseq1	5s_expressed	51491947	51492065	-	119	58
5Sseq1	5s_expressed	51492124	51492242	-	119	58
5Sseq1	5s_expressed	51492301	51492419	-	119	58
5Sseq1	5s_expressed	51492478	51492596	-	119	58
5Sseq1	5s_expressed	51492655	51492773	-	119	58
5Sseq1	5s_expressed	51492832	51492950	-	119	58
5Sseq1	5s_expressed	51493009	51493127	-	119	58
5Sseq1	5s_expressed	51493186	51493304	-	119	58
5Sseq1	5s_expressed	51493363	51493481	-	119	58
5Sseq1	5s_expressed	51493540	51493658	-	119	58
5Sseq1	5s_expressed	51493717	51493835	-	119	58
5Sseq1	5s_expressed	51493894	51494012	-	119	58
5Sseq1	5s_expressed	51494071	51494189	-	119	58
5Sseq1	5s_expressed	51494248	51494366	-	119	58
5Sseq1	5s_expressed	51494425	51494543	-	119	58
5Sseq1	5s_expressed	51494602	51494720	-	119	58
5Sseq1	5s_expressed	51494779	51494897	-	119	58
5SNONexpr	5s_nonexpressed	51494956	51495074	-	119	58
5SNONexpr	5s_nonexpressed	51495133	51495252	-	120	58
5Sseq1	5s_expressed	51495311	51495429	-	119	58
5Sseq1	5s_expressed	51495488	51495606	-	119	58
5Sseq1	5s_expressed	51495665	51495783	-	119	58
5Sseq1	5s_expressed	51495842	51495960	-	119	58
5Sseq1	5s_expressed	51496019	51496137	-	119	58
MutsuDr 2	LINE	51496294	51501871	-	5578	156
5SNONexpr	5s_nonexpressed	51501951	51502068	-	118	79
5SNONexpr	5s_nonexpressed	51502128	51502245	-	118	59
5SNONexpr	5s_nonexpressed	51502305	51502404	-	100	59
MutsuDr 1	LINE	51502405	51507980	-	5576	0
5Sseq1	5s_expressed	51508058	51508176	-	119	77
5Sseq1	5s_expressed	51508235	51508353	-	119	58
5Sseq1	5s_expressed	51508412	51508530	-	119	58
5Sseq1	5s_expressed	51508589	51508707	-	119	58
5Sseq1	5s_expressed	51508766	51508884	-	119	58
5Sseq1	5s_expressed	51508943	51509061	-	119	58
5Sseq1	5s_expressed	51509120	51509238	-	119	58
5Sseq1	5s_expressed	51509297	51509415	-	119	58
5Sseq1	5s_expressed	51509474	51509592	-	119	58
5Sseq1	5s_expressed	51509651	51509769	-	119	58
5Sseq1	5s_expressed	51509828	51509946	-	119	58
5Sseq1	5s_expressed	51510005	51510123	-	119	58
5SNONexpr	5s_nonexpressed	51510182	51510300	-	119	58
5Sseq1	5s_expressed	51510359	51510477	-	119	58
5Sseq1	5s_expressed	51510536	51510654	-	119	58
5SNONexpr	5s_nonexpressed	51510713	51510830	-	118	58
5Sseq1	5s_expressed	51510890	51511008	-	119	59
5Sseq1	5s_expressed	51511067	51511185	-	119	58
5Sseq1	5s_expressed	51511244	51511362	-	119	58
5Sseq1	5s_expressed	51511421	51511539	-	119	58
5Sseq1	5s_expressed	51511598	51511716	-	119	58
5SNONexpr	5s_nonexpressed	51511775	51511893	-	119	58
5Sseq1	5s_expressed	51511952	51512070	-	119	58
5Sseq1	5s_expressed	51512129	51512247	-	119	58
5SNONexpr	5s_nonexpressed	51512306	51512424	-	119	58
5Sseq33	5s_expressed	51512483	51512601	-	119	58
5Sseq1	5s_expressed	51512660	51512778	-	119	58
5Sseq29	5s_expressed	51512837	51512955	-	119	58
5Sseq1	5s_expressed	51513014	51513132	-	119	58
5Sseq1	5s_expressed	51513191	51513309	-	119	58
5Sseq10	5s_expressed	51513368	51513486	-	119	58
5SNONexpr	5s_nonexpressed	51513545	51513663	-	119	58
5Sseq1	5s_expressed	51513722	51513840	-	119	58
5Sseq33	5s_expressed	51513899	51514017	-	119	58
5Sseq1	5s_expressed	51514076	51514194	-	119	58
5Sseq1	5s_expressed	51514253	51514371	-	119	58
5Sseq1	5s_expressed	51514430	51514548	-	119	58
5Sseq55	5s_expressed	51514607	51514725	-	119	58
5Sseq1	5s_expressed	51514784	51514902	-	119	58
5Sseq1	5s_expressed	51514961	51515079	-	119	58
5Sseq1	5s_expressed	51515138	51515256	-	119	58
5SNONexpr	5s_nonexpressed	51515315	51515429	-	115	58
5Sseq57	5s_expressed	51515486	51515604	-	119	56
5SNONexpr	5s_nonexpressed	51515663	51515781	-	119	58
5Sseq1	5s_expressed	51515840	51515958	-	119	58
5Sseq1	5s_expressed	51516017	51516135	-	119	58
5SNONexpr	5s_nonexpressed	51516194	51516312	-	119	58
5Sseq1	5s_expressed	51516371	51516489	-	119	58
5Sseq1	5s_expressed	51516548	51516666	-	119	58
5Sseq1	5s_expressed	51516724	51516842	-	119	57
5Sseq1	5s_expressed	51516901	51517019	-	119	58
5Sseq1	5s_expressed	51517078	51517196	-	119	58
5Sseq1	5s_expressed	51517255	51517373	-	119	58
5Sseq1	5s_expressed	51517432	51517550	-	119	58
5Sseq1	5s_expressed	51517609	51517727	-	119	58
5Sseq1	5s_expressed	51517786	51517904	-	119	58
5Sseq1	5s_expressed	51517963	51518081	-	119	58
5Sseq1	5s_expressed	51518140	51518258	-	119	58
5Sseq1	5s_expressed	51518317	51518435	-	119	58
5SNONexpr	5s_nonexpressed	51518494	51518611	-	118	58
5Sseq1	5s_expressed	51518670	51518788	-	119	58
5Sseq1	5s_expressed	51518847	51518965	-	119	58
5Sseq1	5s_expressed	51519024	51519142	-	119	58
5Sseq1	5s_expressed	51519201	51519319	-	119	58
5Sseq1	5s_expressed	51519378	51519496	-	119	58
5Sseq1	5s_expressed	51519555	51519673	-	119	58
5Sseq1	5s_expressed	51519732	51519850	-	119	58
5Sseq1	5s_expressed	51519909	51520027	-	119	58
5Sseq1	5s_expressed	51520086	51520204	-	119	58
5Sseq1	5s_expressed	51520263	51520381	-	119	58
5Sseq1	5s_expressed	51520440	51520558	-	119	58
5Sseq1	5s_expressed	51520617	51520735	-	119	58
5SNONexpr	5s_nonexpressed	51520797	51520912	-	116	61
5Sseq1	5s_expressed	51520971	51521089	-	119	58
5Sseq1	5s_expressed	51521148	51521266	-	119	58
5Sseq1	5s_expressed	51521325	51521443	-	119	58
5Sseq1	5s_expressed	51521502	51521620	-	119	58
5Sseq1	5s_expressed	51521679	51521797	-	119	58
5SNONexpr	5s_nonexpressed	51521856	51521973	-	118	58
5Sseq1	5s_expressed	51522033	51522151	-	119	59
5Sseq1	5s_expressed	51522210	51522328	-	119	58
5Sseq1	5s_expressed	51522387	51522505	-	119	58
5Sseq1	5s_expressed	51522564	51522682	-	119	58
5Sseq1	5s_expressed	51522741	51522859	-	119	58
5Sseq1	5s_expressed	51522918	51523036	-	119	58
5Sseq1	5s_expressed	51523095	51523213	-	119	58
5Sseq1	5s_expressed	51523272	51523390	-	119	58
5Sseq1	5s_expressed	51523449	51523567	-	119	58
5Sseq1	5s_expressed	51523626	51523744	-	119	58
5Sseq58	5s_expressed	51523803	51523921	-	119	58
5Sseq1	5s_expressed	51523980	51524098	-	119	58
5Sseq1	5s_expressed	51524157	51524275	-	119	58
5SNONexpr	5s_nonexpressed	51524334	51524451	-	118	58
5Sseq1	5s_expressed	51524511	51524629	-	119	59
5Sseq1	5s_expressed	51524688	51524806	-	119	58
5Sseq1	5s_expressed	51524865	51524983	-	119	58
5Sseq1	5s_expressed	51525042	51525160	-	119	58
5Sseq1	5s_expressed	51525219	51525337	-	119	58
5Sseq1	5s_expressed	51525396	51525514	-	119	58
5Sseq1	5s_expressed	51525573	51525691	-	119	58
MutsuDr 2	LINE	51525848	51531425	-	5578	156
5SNONexpr	5s_nonexpressed	51531505	51531622	-	118	79
5SNONexpr	5s_nonexpressed	51531682	51531799	-	118	59
5SNONexpr	5s_nonexpressed	51531859	51531958	-	100	59
MutsuDr 1	LINE	51531959	51537532	-	5574	0
5Sseq1	5s_expressed	51537610	51537728	-	119	77
5Sseq1	5s_expressed	51537787	51537905	-	119	58
5Sseq1	5s_expressed	51537964	51538082	-	119	58
5Sseq1	5s_expressed	51538141	51538259	-	119	58
5Sseq1	5s_expressed	51538318	51538436	-	119	58
5Sseq1	5s_expressed	51538495	51538613	-	119	58
5Sseq1	5s_expressed	51538672	51538790	-	119	58
5Sseq1	5s_expressed	51538849	51538967	-	119	58
5Sseq1	5s_expressed	51539026	51539144	-	119	58
5Sseq1	5s_expressed	51539203	51539321	-	119	58
5Sseq1	5s_expressed	51539380	51539498	-	119	58
5Sseq1	5s_expressed	51539557	51539675	-	119	58
5Sseq59	5s_expressed	51539734	51539852	-	119	58
5Sseq9	5s_expressed	51539911	51540029	-	119	58
5Sseq1	5s_expressed	51540088	51540206	-	119	58
5Sseq1	5s_expressed	51540265	51540383	-	119	58
5Sseq1	5s_expressed	51540442	51540560	-	119	58
5Sseq46	5s_expressed	51540619	51540737	-	119	58
5Sseq1	5s_expressed	51540796	51540914	-	119	58
5SNONexpr	5s_nonexpressed	51540973	51541091	-	119	58
5Sseq1	5s_expressed	51541150	51541268	-	119	58
5Sseq60	5s_expressed	51541327	51541445	-	119	58
5Sseq10	5s_expressed	51541504	51541622	-	119	58
5SNONexpr	5s_nonexpressed	51541681	51541799	-	119	58
5Sseq1	5s_expressed	51541858	51541976	-	119	58
5Sseq1	5s_expressed	51542035	51542153	-	119	58
5Sseq1	5s_expressed	51542212	51542330	-	119	58
5Sseq1	5s_expressed	51542389	51542507	-	119	58
5Sseq1	5s_expressed	51542566	51542684	-	119	58
5Sseq1	5s_expressed	51542743	51542861	-	119	58
5Sseq1	5s_expressed	51542920	51543038	-	119	58
5Sseq1	5s_expressed	51543097	51543215	-	119	58
5Sseq1	5s_expressed	51543274	51543392	-	119	58
5Sseq1	5s_expressed	51543451	51543569	-	119	58
5Sseq1	5s_expressed	51543628	51543746	-	119	58
5Sseq1	5s_expressed	51543805	51543923	-	119	58
5Sseq1	5s_expressed	51543982	51544100	-	119	58
5Sseq1	5s_expressed	51544159	51544277	-	119	58
5SNONexpr	5s_nonexpressed	51544336	51544454	-	119	58
5Sseq35	5s_expressed	51544513	51544631	-	119	58
5Sseq1	5s_expressed	51544690	51544808	-	119	58
5Sseq1	5s_expressed	51544867	51544985	-	119	58
5SNONexpr	5s_nonexpressed	51545044	51545162	-	119	58
5Sseq1	5s_expressed	51545221	51545339	-	119	58
5Sseq1	5s_expressed	51545398	51545516	-	119	58
5SNONexpr	5s_nonexpressed	51545575	51545692	-	118	58
5SNONexpr	5s_nonexpressed	51545752	51545870	-	119	59
5Sseq1	5s_expressed	51545929	51546047	-	119	58
5Sseq1	5s_expressed	51546106	51546224	-	119	58
5Sseq1	5s_expressed	51546283	51546401	-	119	58
5Sseq1	5s_expressed	51546460	51546578	-	119	58
5SNONexpr	5s_nonexpressed	51546637	51546755	-	119	58
5Sseq1	5s_expressed	51546814	51546932	-	119	58
5Sseq1	5s_expressed	51546991	51547109	-	119	58
5SNONexpr	5s_nonexpressed	51547168	51547286	-	119	58
5Sseq33	5s_expressed	51547345	51547463	-	119	58
5Sseq1	5s_expressed	51547522	51547640	-	119	58
5Sseq29	5s_expressed	51547699	51547817	-	119	58
5Sseq1	5s_expressed	51547876	51547994	-	119	58
5Sseq1	5s_expressed	51548053	51548171	-	119	58
5Sseq10	5s_expressed	51548230	51548348	-	119	58
5SNONexpr	5s_nonexpressed	51548407	51548525	-	119	58
5Sseq1	5s_expressed	51548584	51548702	-	119	58
5Sseq33	5s_expressed	51548761	51548879	-	119	58
5Sseq1	5s_expressed	51548938	51549056	-	119	58
5Sseq1	5s_expressed	51549115	51549233	-	119	58
5Sseq1	5s_expressed	51549292	51549410	-	119	58
5Sseq55	5s_expressed	51549469	51549587	-	119	58
5Sseq1	5s_expressed	51549646	51549764	-	119	58
5Sseq1	5s_expressed	51549823	51549941	-	119	58
5Sseq1	5s_expressed	51550000	51550118	-	119	58
5SNONexpr	5s_nonexpressed	51550177	51550291	-	115	58
5Sseq1	5s_expressed	51550348	51550466	-	119	56
5SNONexpr	5s_nonexpressed	51550525	51550643	-	119	58
5Sseq1	5s_expressed	51550702	51550820	-	119	58
5Sseq1	5s_expressed	51550879	51550997	-	119	58
5SNONexpr	5s_nonexpressed	51551056	51551174	-	119	58
5Sseq1	5s_expressed	51551233	51551351	-	119	58
5Sseq1	5s_expressed	51551410	51551528	-	119	58
5Sseq1	5s_expressed	51551586	51551704	-	119	57
5SNONexpr	5s_nonexpressed	51551763	51551881	-	119	58
5Sseq1	5s_expressed	51551940	51552058	-	119	58
5Sseq1	5s_expressed	51552117	51552235	-	119	58
5Sseq1	5s_expressed	51552294	51552412	-	119	58
5Sseq1	5s_expressed	51552471	51552589	-	119	58
5Sseq1	5s_expressed	51552648	51552766	-	119	58
5Sseq1	5s_expressed	51552825	51552943	-	119	58
5Sseq1	5s_expressed	51553002	51553120	-	119	58
5Sseq1	5s_expressed	51553179	51553297	-	119	58
5SNONexpr	5s_nonexpressed	51553356	51553473	-	118	58
5Sseq1	5s_expressed	51553532	51553650	-	119	58
5Sseq1	5s_expressed	51553709	51553827	-	119	58
5Sseq1	5s_expressed	51553886	51554004	-	119	58
5Sseq1	5s_expressed	51554063	51554181	-	119	58
5Sseq1	5s_expressed	51554240	51554358	-	119	58
5Sseq33	5s_expressed	51554417	51554535	-	119	58
5Sseq1	5s_expressed	51554594	51554712	-	119	58
5Sseq1	5s_expressed	51554771	51554889	-	119	58
5Sseq1	5s_expressed	51554948	51555066	-	119	58
5Sseq55	5s_expressed	51555125	51555243	-	119	58
5Sseq1	5s_expressed	51555302	51555420	-	119	58
5Sseq1	5s_expressed	51555479	51555597	-	119	58
5Sseq1	5s_expressed	51555656	51555774	-	119	58
5SNONexpr	5s_nonexpressed	51555833	51555947	-	115	58
5Sseq57	5s_expressed	51556004	51556122	-	119	56
5SNONexpr	5s_nonexpressed	51556181	51556299	-	119	58
5Sseq1	5s_expressed	51556358	51556476	-	119	58
5Sseq1	5s_expressed	51556535	51556653	-	119	58
5SNONexpr	5s_nonexpressed	51556712	51556830	-	119	58
5Sseq1	5s_expressed	51556889	51557007	-	119	58
5Sseq1	5s_expressed	51557066	51557184	-	119	58
5Sseq1	5s_expressed	51557242	51557360	-	119	57
5Sseq1	5s_expressed	51557419	51557537	-	119	58
5Sseq1	5s_expressed	51557596	51557714	-	119	58
5Sseq1	5s_expressed	51557773	51557891	-	119	58
5Sseq1	5s_expressed	51557950	51558068	-	119	58
5Sseq1	5s_expressed	51558127	51558245	-	119	58
5Sseq1	5s_expressed	51558304	51558422	-	119	58
5Sseq1	5s_expressed	51558481	51558599	-	119	58
5Sseq1	5s_expressed	51558658	51558776	-	119	58
5Sseq1	5s_expressed	51558835	51558953	-	119	58
5SNONexpr	5s_nonexpressed	51559012	51559129	-	118	58
5Sseq1	5s_expressed	51559188	51559306	-	119	58
5Sseq1	5s_expressed	51559365	51559483	-	119	58
5Sseq1	5s_expressed	51559542	51559660	-	119	58
5Sseq1	5s_expressed	51559719	51559837	-	119	58
5Sseq1	5s_expressed	51559896	51560014	-	119	58
5Sseq1	5s_expressed	51560073	51560191	-	119	58
5Sseq1	5s_expressed	51560250	51560368	-	119	58
5Sseq1	5s_expressed	51560427	51560545	-	119	58
5Sseq1	5s_expressed	51560604	51560722	-	119	58
5Sseq1	5s_expressed	51560781	51560899	-	119	58
5Sseq1	5s_expressed	51560958	51561076	-	119	58
5Sseq1	5s_expressed	51561135	51561253	-	119	58
5Sseq1	5s_expressed	51561312	51561430	-	119	58
5Sseq1	5s_expressed	51561489	51561607	-	119	58
5Sseq1	5s_expressed	51561666	51561784	-	119	58
5Sseq1	5s_expressed	51561843	51561961	-	119	58
5Sseq1	5s_expressed	51562020	51562138	-	119	58
5SNONexpr	5s_nonexpressed	51562197	51562315	-	119	58
5Sseq35	5s_expressed	51562374	51562492	-	119	58
5Sseq1	5s_expressed	51562551	51562669	-	119	58
5Sseq1	5s_expressed	51562728	51562846	-	119	58
5SNONexpr	5s_nonexpressed	51562905	51563023	-	119	58
5Sseq1	5s_expressed	51563082	51563200	-	119	58
5Sseq1	5s_expressed	51563259	51563377	-	119	58
5SNONexpr	5s_nonexpressed	51563436	51563553	-	118	58
5Sseq1	5s_expressed	51563613	51563731	-	119	59
5Sseq1	5s_expressed	51563790	51563908	-	119	58
5Sseq1	5s_expressed	51563967	51564085	-	119	58
5Sseq1	5s_expressed	51564144	51564262	-	119	58
5Sseq1	5s_expressed	51564321	51564439	-	119	58
5SNONexpr	5s_nonexpressed	51564498	51564616	-	119	58
5Sseq1	5s_expressed	51564675	51564793	-	119	58
5Sseq1	5s_expressed	51564852	51564970	-	119	58
5SNONexpr	5s_nonexpressed	51565029	51565147	-	119	58
5Sseq33	5s_expressed	51565206	51565324	-	119	58
5Sseq1	5s_expressed	51565383	51565501	-	119	58
5Sseq29	5s_expressed	51565560	51565678	-	119	58
5Sseq1	5s_expressed	51565737	51565855	-	119	58
5Sseq1	5s_expressed	51565914	51566032	-	119	58
5Sseq10	5s_expressed	51566091	51566209	-	119	58
5SNONexpr	5s_nonexpressed	51566268	51566386	-	119	58
5Sseq1	5s_expressed	51566445	51566563	-	119	58
5Sseq33	5s_expressed	51566622	51566740	-	119	58
5Sseq1	5s_expressed	51566799	51566917	-	119	58
5Sseq1	5s_expressed	51566976	51567094	-	119	58
5Sseq1	5s_expressed	51567153	51567271	-	119	58
5Sseq55	5s_expressed	51567330	51567448	-	119	58
5Sseq1	5s_expressed	51567507	51567625	-	119	58
5Sseq1	5s_expressed	51567684	51567802	-	119	58
5Sseq1	5s_expressed	51567861	51567979	-	119	58
5SNONexpr	5s_nonexpressed	51568038	51568152	-	115	58
5Sseq57	5s_expressed	51568209	51568327	-	119	56
5SNONexpr	5s_nonexpressed	51568386	51568504	-	119	58
5Sseq1	5s_expressed	51568563	51568681	-	119	58
5Sseq1	5s_expressed	51568740	51568858	-	119	58
5SNONexpr	5s_nonexpressed	51568917	51569035	-	119	58
5Sseq1	5s_expressed	51569094	51569212	-	119	58
5Sseq1	5s_expressed	51569271	51569389	-	119	58
5Sseq1	5s_expressed	51569447	51569565	-	119	57
5Sseq1	5s_expressed	51569624	51569742	-	119	58
5Sseq1	5s_expressed	51569801	51569919	-	119	58
5Sseq1	5s_expressed	51569978	51570096	-	119	58
5Sseq1	5s_expressed	51570155	51570273	-	119	58
5Sseq1	5s_expressed	51570332	51570450	-	119	58
5Sseq1	5s_expressed	51570509	51570627	-	119	58
5Sseq1	5s_expressed	51570686	51570804	-	119	58
5Sseq1	5s_expressed	51570863	51570981	-	119	58
5Sseq1	5s_expressed	51571040	51571158	-	119	58
5SNONexpr	5s_nonexpressed	51571217	51571334	-	118	58
5Sseq1	5s_expressed	51571393	51571511	-	119	58
5Sseq1	5s_expressed	51571570	51571688	-	119	58
5Sseq1	5s_expressed	51571747	51571865	-	119	58
5Sseq1	5s_expressed	51571924	51572042	-	119	58
5Sseq1	5s_expressed	51572101	51572219	-	119	58
5Sseq1	5s_expressed	51572278	51572396	-	119	58
5Sseq1	5s_expressed	51572455	51572573	-	119	58
5Sseq1	5s_expressed	51572632	51572750	-	119	58
5Sseq1	5s_expressed	51572809	51572927	-	119	58
5Sseq1	5s_expressed	51572986	51573104	-	119	58
5Sseq1	5s_expressed	51573163	51573281	-	119	58
5Sseq1	5s_expressed	51573340	51573458	-	119	58
5SNONexpr	5s_nonexpressed	51573520	51573635	-	116	61
5Sseq1	5s_expressed	51573694	51573812	-	119	58
5Sseq1	5s_expressed	51573871	51573989	-	119	58
5Sseq1	5s_expressed	51574048	51574166	-	119	58
5Sseq1	5s_expressed	51574225	51574343	-	119	58
5Sseq1	5s_expressed	51574402	51574520	-	119	58
5SNONexpr	5s_nonexpressed	51574579	51574696	-	118	58
5Sseq1	5s_expressed	51574756	51574874	-	119	59
5Sseq1	5s_expressed	51574933	51575051	-	119	58
5Sseq1	5s_expressed	51575110	51575228	-	119	58
5Sseq1	5s_expressed	51575287	51575405	-	119	58
5Sseq1	5s_expressed	51575464	51575582	-	119	58
5Sseq1	5s_expressed	51575641	51575759	-	119	58
5Sseq1	5s_expressed	51575818	51575936	-	119	58
5Sseq1	5s_expressed	51575995	51576113	-	119	58
5Sseq1	5s_expressed	51576172	51576290	-	119	58
5Sseq1	5s_expressed	51576349	51576467	-	119	58
5Sseq58	5s_expressed	51576526	51576644	-	119	58
5Sseq1	5s_expressed	51576703	51576821	-	119	58
5Sseq1	5s_expressed	51576880	51576998	-	119	58
5SNONexpr	5s_nonexpressed	51577057	51577174	-	118	58
5Sseq1	5s_expressed	51577234	51577352	-	119	59
5Sseq1	5s_expressed	51577411	51577529	-	119	58
5Sseq1	5s_expressed	51577588	51577706	-	119	58
5Sseq1	5s_expressed	51577765	51577883	-	119	58
5Sseq1	5s_expressed	51577942	51578060	-	119	58
5Sseq1	5s_expressed	51578119	51578237	-	119	58
5Sseq1	5s_expressed	51578296	51578414	-	119	58
5Sseq46	5s_expressed	51578626	51578744	-	119	211
5Sseq1	5s_expressed	51578803	51578921	-	119	58
5SNONexpr	5s_nonexpressed	51578980	51579097	-	118	58
5SNONexpr	5s_nonexpressed	51579157	51579274	-	118	59
5SNONexpr	5s_nonexpressed	51579334	51579446	-	113	59
5Sseq36	5s_expressed	51579670	51579788	-	119	223
5Sseq1	5s_expressed	51579847	51579965	-	119	58
5Sseq1	5s_expressed	51580024	51580142	-	119	58
5Sseq1	5s_expressed	51580201	51580319	-	119	58
5Sseq59	5s_expressed	51580378	51580496	-	119	58
5Sseq9	5s_expressed	51580555	51580673	-	119	58
5Sseq1	5s_expressed	51580732	51580850	-	119	58
5Sseq1	5s_expressed	51580909	51581027	-	119	58
5SNONexpr	5s_nonexpressed	51581086	51581203	-	118	58
5Sseq1	5s_expressed	51581263	51581381	-	119	59
5Sseq1	5s_expressed	51581440	51581558	-	119	58
5Sseq1	5s_expressed	51581617	51581735	-	119	58
5SNONexpr	5s_nonexpressed	51581794	51581911	-	118	58
5Sseq1	5s_expressed	51581971	51582089	-	119	59
5Sseq1	5s_expressed	51582148	51582266	-	119	58
5Sseq1	5s_expressed	51582325	51582443	-	119	58
5Sseq1	5s_expressed	51582502	51582620	-	119	58
5Sseq36	5s_expressed	51582679	51582797	-	119	58
5Sseq1	5s_expressed	51582856	51582974	-	119	58
5Sseq1	5s_expressed	51583033	51583151	-	119	58
5SNONexpr	5s_nonexpressed	51583210	51583328	-	119	58
5SNONexpr	5s_nonexpressed	51583387	51583504	-	118	58
5SNONexpr	5s_nonexpressed	51583564	51583676	-	113	59
5Sseq1	5s_expressed	51583866	51583984	-	119	189
5Sseq1	5s_expressed	51584043	51584161	-	119	58
5Sseq1	5s_expressed	51584220	51584338	-	119	58
5Sseq1	5s_expressed	51584397	51584515	-	119	58
5Sseq1	5s_expressed	51584574	51584692	-	119	58
5Sseq59	5s_expressed	51584751	51584869	-	119	58
5Sseq9	5s_expressed	51584928	51585046	-	119	58
5Sseq1	5s_expressed	51585105	51585223	-	119	58
5Sseq1	5s_expressed	51585282	51585400	-	119	58
5Sseq1	5s_expressed	51585459	51585577	-	119	58
5Sseq46	5s_expressed	51585636	51585754	-	119	58
5SNONexpr	5s_nonexpressed	51585813	51585934	-	122	58
5Sseq1	5s_expressed	51585993	51586111	-	119	58
5Sseq1	5s_expressed	51586170	51586288	-	119	58
5Sseq1	5s_expressed	51586347	51586465	-	119	58
5Sseq1	5s_expressed	51586524	51586642	-	119	58
5Sseq1	5s_expressed	51586701	51586819	-	119	58
5Sseq58	5s_expressed	51586878	51586996	-	119	58
5Sseq1	5s_expressed	51587055	51587173	-	119	58
5Sseq1	5s_expressed	51587232	51587350	-	119	58
5Sseq1	5s_expressed	51587409	51587527	-	119	58
5Sseq1	5s_expressed	51587586	51587704	-	119	58
5Sseq1	5s_expressed	51587763	51587881	-	119	58
5Sseq1	5s_expressed	51587940	51588058	-	119	58
5SNONexpr	5s_nonexpressed	51588120	51588235	-	116	61
5Sseq1	5s_expressed	51588294	51588412	-	119	58
5Sseq1	5s_expressed	51588471	51588589	-	119	58
5Sseq1	5s_expressed	51588648	51588766	-	119	58
5Sseq1	5s_expressed	51588825	51588943	-	119	58
5Sseq1	5s_expressed	51589002	51589120	-	119	58
5SNONexpr	5s_nonexpressed	51589179	51589296	-	118	58
5Sseq1	5s_expressed	51589356	51589474	-	119	59
5Sseq1	5s_expressed	51589533	51589651	-	119	58
5Sseq1	5s_expressed	51589710	51589828	-	119	58
5Sseq1	5s_expressed	51589887	51590005	-	119	58
5Sseq1	5s_expressed	51590064	51590182	-	119	58
5SNONexpr	5s_nonexpressed	51590241	51590358	-	118	58
5Sseq1	5s_expressed	51590418	51590536	-	119	59
5Sseq1	5s_expressed	51590595	51590713	-	119	58
5Sseq1	5s_expressed	51590772	51590890	-	119	58
5Sseq1	5s_expressed	51590949	51591067	-	119	58
5Sseq58	5s_expressed	51591126	51591244	-	119	58
5Sseq1	5s_expressed	51591303	51591421	-	119	58
5Sseq1	5s_expressed	51591480	51591598	-	119	58
5SNONexpr	5s_nonexpressed	51591657	51591774	-	118	58
5Sseq1	5s_expressed	51591834	51591952	-	119	59
5Sseq1	5s_expressed	51592011	51592129	-	119	58
5Sseq1	5s_expressed	51592188	51592306	-	119	58
5Sseq1	5s_expressed	51592365	51592483	-	119	58
5Sseq1	5s_expressed	51592542	51592660	-	119	58
5Sseq1	5s_expressed	51592719	51592837	-	119	58
5Sseq1	5s_expressed	51592896	51593014	-	119	58
MutsuDr 5	LINE	51593171	51598814	-	5644	156
5Sseq1	5s_expressed	51598895	51599013	-	119	80
5Sseq1	5s_expressed	51599072	51599190	-	119	58
5Sseq1	5s_expressed	51599249	51599367	-	119	58
5Sseq1	5s_expressed	51599426	51599544	-	119	58
5SNONexpr	5s_nonexpressed	51599603	51599702	-	100	58
MutsuDr 1	LINE	51599703	51605249	-	5547	0
5SNONexpr	5s_nonexpressed	51605448	51605566	-	119	198
5Sseq37	5s_expressed	51605746	51605864	-	119	179
5SNONexpr	5s_nonexpressed	51606044	51606162	-	119	179
5Sseq37	5s_expressed	51606342	51606460	-	119	179
5SNONexpr	5s_nonexpressed	51606640	51606758	-	119	179
5SNONexpr	5s_nonexpressed	51606940	51607056	-	117	181
5Sseq37	5s_expressed	51607236	51607354	-	119	179
5Sseq37	5s_expressed	51607534	51607652	-	119	179
5Sseq37	5s_expressed	51607832	51607950	-	119	179
5SNONexpr	5s_nonexpressed	51608129	51608247	-	119	178
5Sseq37	5s_expressed	51608427	51608545	-	119	179
5SNONexpr	5s_nonexpressed	51608724	51608827	-	104	178
MutsuDr 4	LINE	51608828	51614345	-	5518	0
5Sseq1	5s_expressed	52102504	52102622	+	119	488158
5Sseq1	5s_expressed	52102681	52102799	+	119	58
5Sseq1	5s_expressed	52102858	52102976	+	119	58
5Sseq1	5s_expressed	52103034	52103152	+	119	57
5Sseq1	5s_expressed	52103211	52103329	+	119	58
5Sseq1	5s_expressed	52103388	52103506	+	119	58
5Sseq62	5s_expressed	52103565	52103683	+	119	58
5Sseq1	5s_expressed	52103742	52103860	+	119	58
5Sseq1	5s_expressed	52103919	52104037	+	119	58
5Sseq1	5s_expressed	52104096	52104214	+	119	58
5Sseq1	5s_expressed	52104273	52104391	+	119	58
5Sseq1	5s_expressed	52104450	52104568	+	119	58
5Sseq1	5s_expressed	52104627	52104745	+	119	58
5Sseq1	5s_expressed	52104804	52104922	+	119	58
5Sseq27	5s_expressed	52104981	52105099	+	119	58
5Sseq1	5s_expressed	52105158	52105276	+	119	58
5Sseq1	5s_expressed	52105335	52105453	+	119	58
5Sseq1	5s_expressed	52105512	52105630	+	119	58
5Sseq1	5s_expressed	52105689	52105807	+	119	58
5Sseq1	5s_expressed	52105866	52105984	+	119	58
5Sseq1	5s_expressed	52106043	52106161	+	119	58
5Sseq1	5s_expressed	52106220	52106338	+	119	58
5Sseq1	5s_expressed	52106397	52106515	+	119	58
5Sseq1	5s_expressed	52106574	52106692	+	119	58
5Sseq1	5s_expressed	52106751	52106869	+	119	58
5Sseq1	5s_expressed	52106928	52107046	+	119	58
5Sseq1	5s_expressed	52107105	52107223	+	119	58
5Sseq1	5s_expressed	52107282	52107400	+	119	58
5Sseq1	5s_expressed	52107459	52107577	+	119	58
5Sseq1	5s_expressed	52107636	52107754	+	119	58
5Sseq1	5s_expressed	52107813	52107931	+	119	58
5Sseq1	5s_expressed	52107990	52108108	+	119	58
5Sseq1	5s_expressed	52108167	52108285	+	119	58
5Sseq1	5s_expressed	52108344	52108462	+	119	58
5Sseq1	5s_expressed	52108521	52108639	+	119	58
5Sseq1	5s_expressed	52108698	52108816	+	119	58
5Sseq1	5s_expressed	52108875	52108993	+	119	58
5Sseq1	5s_expressed	52109052	52109170	+	119	58
5Sseq1	5s_expressed	52109229	52109347	+	119	58
5Sseq1	5s_expressed	52109406	52109524	+	119	58
5Sseq1	5s_expressed	52109583	52109701	+	119	58
5Sseq1	5s_expressed	52109760	52109878	+	119	58
5Sseq1	5s_expressed	52109937	52110055	+	119	58
5Sseq1	5s_expressed	52110114	52110232	+	119	58
5Sseq1	5s_expressed	52110291	52110409	+	119	58
5Sseq1	5s_expressed	52110468	52110586	+	119	58
5Sseq62	5s_expressed	52110645	52110763	+	119	58
5Sseq1	5s_expressed	52110822	52110940	+	119	58
5Sseq1	5s_expressed	52110999	52111117	+	119	58
5Sseq1	5s_expressed	52111176	52111294	+	119	58
5Sseq1	5s_expressed	52111353	52111471	+	119	58
5Sseq1	5s_expressed	52111530	52111648	+	119	58
5SNONexpr	5s_nonexpressed	52111707	52111816	+	110	58
5Sseq1	5s_expressed	52113032	52113150	+	119	1215
5Sseq1	5s_expressed	52113209	52113327	+	119	58
5Sseq1	5s_expressed	52113386	52113504	+	119	58
5Sseq1	5s_expressed	52113563	52113681	+	119	58
5Sseq1	5s_expressed	52113740	52113858	+	119	58
5Sseq1	5s_expressed	52113917	52114035	+	119	58
5Sseq1	5s_expressed	52114094	52114212	+	119	58
5Sseq1	5s_expressed	52114271	52114389	+	119	58
5Sseq1	5s_expressed	52114448	52114566	+	119	58
5Sseq1	5s_expressed	52114625	52114743	+	119	58
5Sseq1	5s_expressed	52114802	52114920	+	119	58
5Sseq1	5s_expressed	52114979	52115097	+	119	58
5Sseq1	5s_expressed	52115156	52115274	+	119	58
5Sseq1	5s_expressed	52115333	52115451	+	119	58
5Sseq1	5s_expressed	52115510	52115628	+	119	58
5Sseq63	5s_expressed	52115687	52115805	+	119	58
5Sseq1	5s_expressed	52115864	52115982	+	119	58
5Sseq1	5s_expressed	52116041	52116159	+	119	58
5Sseq64	5s_expressed	52116218	52116336	+	119	58
5Sseq1	5s_expressed	52116395	52116513	+	119	58
5Sseq1	5s_expressed	52116572	52116690	+	119	58
5Sseq1	5s_expressed	52116749	52116867	+	119	58
5SNONexpr	5s_nonexpressed	52116926	52117045	+	120	58
5Sseq1	5s_expressed	52117104	52117222	+	119	58
5SNONexpr	5s_nonexpressed	52117281	52117399	+	119	58
5Sseq1	5s_expressed	52117458	52117576	+	119	58
5Sseq1	5s_expressed	52117635	52117753	+	119	58
5Sseq1	5s_expressed	52117812	52117930	+	119	58
5Sseq1	5s_expressed	52117989	52118107	+	119	58
5Sseq1	5s_expressed	52118166	52118284	+	119	58
5Sseq1	5s_expressed	52118343	52118461	+	119	58
5Sseq1	5s_expressed	52118520	52118638	+	119	58
5Sseq1	5s_expressed	52118697	52118815	+	119	58
5Sseq1	5s_expressed	52118874	52118992	+	119	58
5Sseq1	5s_expressed	52119051	52119169	+	119	58
5Sseq1	5s_expressed	52119228	52119346	+	119	58
5Sseq1	5s_expressed	52119405	52119523	+	119	58
5Sseq1	5s_expressed	52119582	52119700	+	119	58
5Sseq1	5s_expressed	52119759	52119877	+	119	58
5Sseq1	5s_expressed	52119936	52120054	+	119	58
MutsuDr 4	LINE	52120134	52125707	+	5574	79
5Sseq1	5s_expressed	52125864	52125982	+	119	156
5Sseq1	5s_expressed	52126041	52126159	+	119	58
5Sseq1	5s_expressed	52126218	52126336	+	119	58
5Sseq1	5s_expressed	52126395	52126513	+	119	58
5Sseq1	5s_expressed	52126572	52126690	+	119	58
5Sseq1	5s_expressed	52126749	52126867	+	119	58
5Sseq1	5s_expressed	52126926	52127044	+	119	58
5Sseq1	5s_expressed	52127103	52127221	+	119	58
5Sseq62	5s_expressed	52127280	52127398	+	119	58
5Sseq1	5s_expressed	52127457	52127575	+	119	58
5Sseq1	5s_expressed	52127634	52127752	+	119	58
5Sseq1	5s_expressed	52127811	52127929	+	119	58
5Sseq1	5s_expressed	52127988	52128106	+	119	58
5Sseq1	5s_expressed	52128165	52128283	+	119	58
5Sseq1	5s_expressed	52128342	52128460	+	119	58
5Sseq1	5s_expressed	52128519	52128637	+	119	58
5Sseq1	5s_expressed	52128696	52128814	+	119	58
5Sseq1	5s_expressed	52128873	52128991	+	119	58
5Sseq1	5s_expressed	52129050	52129168	+	119	58
5Sseq1	5s_expressed	52129227	52129345	+	119	58
5Sseq62	5s_expressed	52129404	52129522	+	119	58
5Sseq1	5s_expressed	52129581	52129699	+	119	58
5Sseq1	5s_expressed	52129758	52129876	+	119	58
5Sseq63	5s_expressed	52129935	52130053	+	119	58
5Sseq1	5s_expressed	52130112	52130230	+	119	58
5Sseq1	5s_expressed	52130289	52130407	+	119	58
5Sseq1	5s_expressed	52130466	52130584	+	119	58
MutsuDr 2	LINE inc	52217305	52220795	+	3491	86720
5SNONexpr	5s_nonexpressed	52220796	52220893	+	98	0
5SNONexpr	5s_nonexpressed	52220952	52221070	+	119	58
5Sseq36	5s_expressed	52221129	52221247	+	119	58
5Sseq1	5s_expressed	52221306	52221424	+	119	58
5Sseq27	5s_expressed	52221483	52221601	+	119	58
5SNONexpr	5s_nonexpressed	52221660	52221778	+	119	58
5SNONexpr	5s_nonexpressed	52221837	52221955	+	119	58
5Sseq1	5s_expressed	52222014	52222132	+	119	58
5Sseq1	5s_expressed	52222191	52222309	+	119	58
5Sseq65	5s_expressed	52222368	52222486	+	119	58
5SNONexpr	5s_nonexpressed	52222545	52222663	+	119	58
5Sseq1	5s_expressed	52222722	52222840	+	119	58
5Sseq1	5s_expressed	52222899	52223017	+	119	58
5Sseq1	5s_expressed	52223076	52223194	+	119	58
5Sseq1	5s_expressed	52223253	52223371	+	119	58
5Sseq1	5s_expressed	52223430	52223548	+	119	58
5Sseq1	5s_expressed	52223607	52223725	+	119	58
5SNONexpr	5s_nonexpressed	52223784	52223902	+	119	58
5Sseq1	5s_expressed	52223961	52224079	+	119	58
5Sseq1	5s_expressed	52224138	52224256	+	119	58
5SNONexpr	5s_nonexpressed	52224315	52224433	+	119	58
5SNONexpr	5s_nonexpressed	52224492	52224610	+	119	58
5Sseq1	5s_expressed	52224669	52224787	+	119	58
5Sseq1	5s_expressed	52224846	52224964	+	119	58
5Sseq1	5s_expressed	52225023	52225141	+	119	58
5SNONexpr	5s_nonexpressed	52225200	52225318	+	119	58
5SNONexpr	5s_nonexpressed	52225377	52225495	+	119	58
5SNONexpr	5s_nonexpressed	52225554	52225672	+	119	58
5SNONexpr	5s_nonexpressed	52225731	52225849	+	119	58
5SNONexpr	5s_nonexpressed	52225908	52226026	+	119	58
5SNONexpr	5s_nonexpressed	52226085	52226203	+	119	58
MutsuDr 5	LINE	52227037	52231614	+	4578	833
5SNONexpr	5s_nonexpressed	52231941	52232053	+	113	326
5SNONexpr	5s_nonexpressed	52232242	52232360	+	119	188
5SNONexpr	5s_nonexpressed	52232419	52232537	+	119	58
5SNONexpr	5s_nonexpressed	52232596	52232714	+	119	58
5Sseq1	5s_expressed	52232773	52232891	+	119	58
MutsuDr 4	LINE	52232971	52238537	+	5567	79
5Sseq1	5s_expressed	52238703	52238821	+	119	165
5SNONexpr	5s_nonexpressed	52238861	52238975	+	115	39
5Sseq1	5s_expressed	52239034	52239152	+	119	58
5Sseq1	5s_expressed	52239211	52239329	+	119	58
5Sseq1	5s_expressed	52239388	52239506	+	119	58
5Sseq1	5s_expressed	52239565	52239683	+	119	58
5SNONexpr	5s_nonexpressed	52239742	52239860	+	119	58
MutsuDr 7	LINE inc	52239864	52242866	+	3003	3
MutsuDr 1	LINE inc	52302110	52305361	-	3252	59243
5SNONexpr	5s_nonexpressed	52305362	52305445	-	84	0
MutsuDr 7	LINE	52305446	52310888	-	5443	0
5Sseq1	5s_expressed	52310968	52311086	-	119	79
5Sseq1	5s_expressed	52311145	52311263	-	119	58
5Sseq31	5s_expressed	52311322	52311440	-	119	58
5Sseq31	5s_expressed	52311499	52311617	-	119	58
5Sseq31	5s_expressed	52311676	52311794	-	119	58
5Sseq31	5s_expressed	52311853	52311971	-	119	58
5Sseq1	5s_expressed	52312030	52312148	-	119	58
5Sseq66	5s_expressed	52312207	52312325	-	119	58
5Sseq1	5s_expressed	52312384	52312502	-	119	58
5Sseq31	5s_expressed	52312561	52312679	-	119	58
5Sseq66	5s_expressed	52312738	52312856	-	119	58
5SNONexpr	5s_nonexpressed	52312915	52313012	-	98	58
MutsuDr 4	LINE	52313013	52318367	-	5355	0
MutsuDr 2	LINE	52320074	52325572	-	5499	1706
5SNONexpr	5s_nonexpressed	52415446	52415570	-	125	89873
5SNONexpr	5s_nonexpressed	52650499	52650614	+	116	234928
5SNONexpr	5s_nonexpressed	52900325	52900436	-	112	249710
5SNONexpr	5s_nonexpressed	52900454	52900569	-	116	17
MutsuDr 4	LINE	53085874	53090579	+	4706	185304
5Sseq1	5s_expressed	53090856	53090974	+	119	276
5SNONexpr	5s_nonexpressed	53091155	53091273	+	119	180
MutsuDr 5	LINE	53091474	53097395	+	5922	200
5SNONexpr	5s_nonexpressed	53097553	53097670	+	118	157
5Sseq1	5s_expressed	53097729	53097847	+	119	58
5Sseq1	5s_expressed	53097906	53098024	+	119	58
5Sseq1	5s_expressed	53098083	53098201	+	119	58
5SNONexpr	5s_nonexpressed	53098261	53098378	+	118	59
5SNONexpr	5s_nonexpressed	53098437	53098555	+	119	58
5Sseq1	5s_expressed	53098614	53098732	+	119	58
5Sseq1	5s_expressed	53098791	53098909	+	119	58
5Sseq1	5s_expressed	53098968	53099086	+	119	58
5SNONexpr	5s_nonexpressed	53099145	53099263	+	119	58
5Sseq1	5s_expressed	53099322	53099440	+	119	58
5SNONexpr	5s_nonexpressed	53099499	53099617	+	119	58
5Sseq1	5s_expressed	53099676	53099794	+	119	58
MutsuDr 1	LINE inc	53099818	53102914	+	3097	23
5SNONexpr	5s_nonexpressed	53169565	53169670	+	106	66650
5SNONexpr	5s_nonexpressed	53169685	53169797	+	113	14
5Sseq1	5s_expressed	53169856	53169974	+	119	58
5Sseq67	5s_expressed	53170033	53170151	+	119	58
5Sseq1	5s_expressed	53170210	53170328	+	119	58
5SNONexpr	5s_nonexpressed	53170387	53170505	+	119	58
5Sseq1	5s_expressed	53170564	53170682	+	119	58
5Sseq1	5s_expressed	53170741	53170859	+	119	58
5Sseq1	5s_expressed	53170918	53171036	+	119	58
5Sseq1	5s_expressed	53171095	53171213	+	119	58
5Sseq68	5s_expressed	53171272	53171390	+	119	58
5Sseq1	5s_expressed	53171449	53171567	+	119	58
5Sseq1	5s_expressed	53171626	53171744	+	119	58
5Sseq1	5s_expressed	53171803	53171921	+	119	58
5SNONexpr	5s_nonexpressed	53171980	53172098	+	119	58
5SNONexpr	5s_nonexpressed	53172157	53172275	+	119	58
5Sseq1	5s_expressed	53172334	53172452	+	119	58
5Sseq1	5s_expressed	53172511	53172629	+	119	58
5Sseq69	5s_expressed	53172685	53172803	+	119	55
5SNONexpr	5s_nonexpressed	53172862	53172980	+	119	58
5Sseq68	5s_expressed	53173039	53173157	+	119	58
5Sseq1	5s_expressed	53173216	53173334	+	119	58
5Sseq1	5s_expressed	53173393	53173511	+	119	58
5Sseq1	5s_expressed	53173570	53173688	+	119	58
5Sseq13	5s_expressed	53173747	53173865	+	119	58
5Sseq1	5s_expressed	53173924	53174042	+	119	58
5Sseq1	5s_expressed	53174101	53174219	+	119	58
5Sseq1	5s_expressed	53174278	53174396	+	119	58
5Sseq70	5s_expressed	53174455	53174573	+	119	58
5SNONexpr	5s_nonexpressed	53174633	53174750	+	118	59
5Sseq1	5s_expressed	53174809	53174927	+	119	58
5Sseq1	5s_expressed	53174986	53175104	+	119	58
5Sseq1	5s_expressed	53175163	53175281	+	119	58
5Sseq1	5s_expressed	53175340	53175458	+	119	58
5Sseq1	5s_expressed	53175517	53175635	+	119	58
5Sseq1	5s_expressed	53175694	53175812	+	119	58
5Sseq1	5s_expressed	53175871	53175989	+	119	58
5Sseq1	5s_expressed	53176048	53176166	+	119	58
5Sseq1	5s_expressed	53176225	53176343	+	119	58
5SNONexpr	5s_nonexpressed	53176402	53176520	+	119	58
5SNONexpr	5s_nonexpressed	53176579	53176695	+	117	58
5Sseq1	5s_expressed	53176756	53176874	+	119	60
5Sseq1	5s_expressed	53176933	53177051	+	119	58
5Sseq1	5s_expressed	53177110	53177228	+	119	58
5SNONexpr	5s_nonexpressed	53177287	53177395	+	109	58
5Sseq1	5s_expressed	53177455	53177573	+	119	59
5Sseq1	5s_expressed	53177632	53177750	+	119	58
5SNONexpr	5s_nonexpressed	53177809	53177927	+	119	58
5Sseq49	5s_expressed	53177986	53178104	+	119	58
5Sseq1	5s_expressed	53178163	53178281	+	119	58
5Sseq1	5s_expressed	53178340	53178458	+	119	58
5Sseq1	5s_expressed	53178517	53178635	+	119	58
5SNONexpr	5s_nonexpressed	53178694	53178812	+	119	58
5SNONexpr	5s_nonexpressed	53178871	53178989	+	119	58
5Sseq68	5s_expressed	53179048	53179166	+	119	58
5Sseq1	5s_expressed	53179225	53179343	+	119	58
5Sseq1	5s_expressed	53179402	53179520	+	119	58
5Sseq1	5s_expressed	53179579	53179697	+	119	58
5Sseq1	5s_expressed	53179756	53179874	+	119	58
5Sseq1	5s_expressed	53179933	53180051	+	119	58
5Sseq1	5s_expressed	53180110	53180228	+	119	58
5Sseq1	5s_expressed	53180287	53180405	+	119	58
5Sseq1	5s_expressed	53180464	53180582	+	119	58
5SNONexpr	5s_nonexpressed	53180641	53180759	+	119	58
5Sseq1	5s_expressed	53180818	53180936	+	119	58
5Sseq72	5s_expressed	53180995	53181113	+	119	58
5Sseq73	5s_expressed	53181172	53181290	+	119	58
5Sseq1	5s_expressed	53181349	53181467	+	119	58
5Sseq1	5s_expressed	53181526	53181644	+	119	58
5Sseq1	5s_expressed	53181703	53181821	+	119	58
5Sseq1	5s_expressed	53181880	53181998	+	119	58
5SNONexpr	5s_nonexpressed	53182057	53182175	+	119	58
5Sseq1	5s_expressed	53182234	53182352	+	119	58
5Sseq72	5s_expressed	53182411	53182529	+	119	58
5Sseq73	5s_expressed	53182588	53182706	+	119	58
5Sseq1	5s_expressed	53182765	53182883	+	119	58
5Sseq1	5s_expressed	53182942	53183060	+	119	58
5Sseq1	5s_expressed	53183119	53183237	+	119	58
5Sseq1	5s_expressed	53183296	53183414	+	119	58
5Sseq74	5s_expressed	53183473	53183591	+	119	58
5SNONexpr	5s_nonexpressed	53183650	53183768	+	119	58
5Sseq1	5s_expressed	53183827	53183945	+	119	58
5Sseq1	5s_expressed	53184004	53184122	+	119	58
5SNONexpr	5s_nonexpressed	53184181	53184300	+	120	58
5Sseq1	5s_expressed	53184359	53184477	+	119	58
5Sseq1	5s_expressed	53184536	53184654	+	119	58
5SNONexpr	5s_nonexpressed	53184713	53184831	+	119	58
5SNONexpr	5s_nonexpressed	53184890	53185008	+	119	58
5Sseq1	5s_expressed	53185067	53185185	+	119	58
MutsuDr 4	LINE	53185265	53190864	+	5600	79
5Sseq1	5s_expressed	53191021	53191139	+	119	156
5Sseq1	5s_expressed	53191198	53191316	+	119	58
5Sseq1	5s_expressed	53191375	53191493	+	119	58
5Sseq1	5s_expressed	53191552	53191670	+	119	58
5Sseq1	5s_expressed	53191729	53191847	+	119	58
5Sseq1	5s_expressed	53191906	53192024	+	119	58
5Sseq1	5s_expressed	53192083	53192201	+	119	58
5Sseq1	5s_expressed	53192260	53192378	+	119	58
5Sseq1	5s_expressed	53192437	53192555	+	119	58
5Sseq1	5s_expressed	53192614	53192732	+	119	58
5Sseq1	5s_expressed	53192791	53192909	+	119	58
5Sseq1	5s_expressed	53192968	53193086	+	119	58
5Sseq1	5s_expressed	53193145	53193263	+	119	58
5Sseq1	5s_expressed	53193322	53193440	+	119	58
5Sseq1	5s_expressed	53193499	53193617	+	119	58
5Sseq1	5s_expressed	53193676	53193794	+	119	58
5Sseq1	5s_expressed	53193853	53193971	+	119	58
5Sseq1	5s_expressed	53194030	53194148	+	119	58
5Sseq1	5s_expressed	53194207	53194325	+	119	58
5Sseq1	5s_expressed	53194384	53194502	+	119	58
5Sseq1	5s_expressed	53194561	53194679	+	119	58
5Sseq1	5s_expressed	53194738	53194856	+	119	58
5Sseq1	5s_expressed	53194915	53195033	+	119	58
5Sseq1	5s_expressed	53195092	53195210	+	119	58
5Sseq13	5s_expressed	53195269	53195387	+	119	58
5Sseq70	5s_expressed	53195446	53195564	+	119	58
5SNONexpr	5s_nonexpressed	53195624	53195741	+	118	59
5Sseq1	5s_expressed	53195800	53195918	+	119	58
5Sseq1	5s_expressed	53195977	53196095	+	119	58
5SNONexpr	5s_nonexpressed	53196154	53196272	+	119	58
5SNONexpr	5s_nonexpressed	53196331	53196449	+	119	58
5Sseq69	5s_expressed	53196508	53196626	+	119	58
5Sseq1	5s_expressed	53196685	53196803	+	119	58
5SNONexpr	5s_nonexpressed	53196862	53196980	+	119	58
5SNONexpr	5s_nonexpressed	53197039	53197157	+	119	58
5SNONexpr	5s_nonexpressed	53197216	53197332	+	117	58
5Sseq1	5s_expressed	53197393	53197511	+	119	60
5Sseq1	5s_expressed	53197570	53197688	+	119	58
5Sseq1	5s_expressed	53197747	53197865	+	119	58
5Sseq68	5s_expressed	53197924	53198042	+	119	58
5Sseq1	5s_expressed	53198101	53198219	+	119	58
5Sseq1	5s_expressed	53198278	53198396	+	119	58
5SNONexpr	5s_nonexpressed	53198455	53198573	+	119	58
5Sseq68	5s_expressed	53198632	53198750	+	119	58
5Sseq1	5s_expressed	53198809	53198927	+	119	58
5Sseq1	5s_expressed	53198986	53199104	+	119	58
5Sseq19	5s_expressed	53199163	53199281	+	119	58
5Sseq1	5s_expressed	53199340	53199458	+	119	58
5SNONexpr	5s_nonexpressed	53199517	53199633	+	117	58
5Sseq1	5s_expressed	53199694	53199812	+	119	60
5Sseq70	5s_expressed	53199871	53199989	+	119	58
5Sseq1	5s_expressed	53200048	53200166	+	119	58
5Sseq1	5s_expressed	53200225	53200343	+	119	58
5Sseq1	5s_expressed	53200402	53200520	+	119	58
5Sseq1	5s_expressed	53200579	53200697	+	119	58
5Sseq69	5s_expressed	53200756	53200874	+	119	58
5Sseq1	5s_expressed	53200933	53201051	+	119	58
5Sseq69	5s_expressed	53201110	53201228	+	119	58
5Sseq1	5s_expressed	53201287	53201405	+	119	58
5SNONexpr	5s_nonexpressed	53201464	53201580	+	117	58
5Sseq1	5s_expressed	53201641	53201759	+	119	60
5Sseq1	5s_expressed	53201818	53201936	+	119	58
5Sseq67	5s_expressed	53201995	53202113	+	119	58
5SNONexpr	5s_nonexpressed	53202172	53202290	+	119	58
5Sseq1	5s_expressed	53202349	53202467	+	119	58
5Sseq1	5s_expressed	53202526	53202644	+	119	58
5Sseq1	5s_expressed	53202704	53202822	+	119	59
5Sseq1	5s_expressed	53202881	53202999	+	119	58
5SNONexpr	5s_nonexpressed	53203058	53203176	+	119	58
5Sseq75	5s_expressed	53203235	53203353	+	119	58
5SNONexpr	5s_nonexpressed	53203412	53203528	+	117	58
5Sseq13	5s_expressed	53203589	53203707	+	119	60
5Sseq1	5s_expressed	53203766	53203884	+	119	58
5SNONexpr	5s_nonexpressed	53203943	53204061	+	119	58
5Sseq1	5s_expressed	53204121	53204239	+	119	59
5Sseq1	5s_expressed	53204298	53204416	+	119	58
5Sseq1	5s_expressed	53204475	53204593	+	119	58
5Sseq1	5s_expressed	53204652	53204770	+	119	58
5Sseq1	5s_expressed	53204829	53204947	+	119	58
5SNONexpr	5s_nonexpressed	53205006	53205124	+	119	58
5Sseq1	5s_expressed	53205183	53205301	+	119	58
5Sseq1	5s_expressed	53205360	53205478	+	119	58
5SNONexpr	5s_nonexpressed	53205537	53205656	+	120	58
5Sseq77	5s_expressed	53205715	53205833	+	119	58
5SNONexpr	5s_nonexpressed	53205892	53206010	+	119	58
5Sseq1	5s_expressed	53206069	53206187	+	119	58
5Sseq1	5s_expressed	53206246	53206364	+	119	58
5Sseq1	5s_expressed	53206423	53206541	+	119	58
5Sseq1	5s_expressed	53206600	53206718	+	119	58
5Sseq1	5s_expressed	53206777	53206895	+	119	58
5Sseq1	5s_expressed	53206954	53207072	+	119	58
5SNONexpr	5s_nonexpressed	53207131	53207247	+	117	58
5Sseq1	5s_expressed	53207308	53207426	+	119	60
5Sseq1	5s_expressed	53207485	53207603	+	119	58
5SNONexpr	5s_nonexpressed	53207662	53207780	+	119	58
5Sseq1	5s_expressed	53207839	53207957	+	119	58
5Sseq74	5s_expressed	53208016	53208134	+	119	58
5Sseq1	5s_expressed	53208193	53208311	+	119	58
5Sseq1	5s_expressed	53208370	53208488	+	119	58
5Sseq1	5s_expressed	53208547	53208665	+	119	58
5Sseq1	5s_expressed	53208724	53208842	+	119	58
5Sseq1	5s_expressed	53208901	53209019	+	119	58
5Sseq1	5s_expressed	53209078	53209196	+	119	58
[truncated: 1,132 more rows]

## Sheet: Chromosome 18
Name	Type	Start	End	Strand	Size (nt)	Spacer (nt)
5SNONexpr	5s_nonexpressed	185872	185990	-	119
5SNONexpr	5s_nonexpressed	235161	235280	-	120	49170
5SNONexpr	5s_nonexpressed	721621	721726	+	106	486340
5SNONexpr	5s_nonexpressed	1174726	1174853	-	128	452999
5SNONexpr	5s_nonexpressed	1256582	1256701	+	120	81728
5SNONexpr	5s_nonexpressed	1294033	1294157	+	125	37331
5SNONexpr	5s_nonexpressed	1440643	1440752	-	110	146485
5SNONexpr	5s_nonexpressed	1542902	1543028	-	127	102149
5SNONexpr	5s_nonexpressed	1751014	1751124	-	111	207985
5SNONexpr	5s_nonexpressed	1826661	1826783	+	123	75536
5SNONexpr	5s_nonexpressed	1908899	1909019	+	121	82115
5SNONexpr	5s_nonexpressed	2045843	2045966	+	124	136823
5SNONexpr	5s_nonexpressed	2252828	2252942	+	115	206861
5SNONexpr	5s_nonexpressed	2362972	2363098	+	127	110029
5SNONexpr	5s_nonexpressed	2424511	2424625	+	115	61412
5SNONexpr	5s_nonexpressed	2426238	2426363	-	126	1612
5SNONexpr	5s_nonexpressed	2492998	2493112	+	115	66634
5SNONexpr	5s_nonexpressed	2537915	2538052	-	138	44802
5SNONexpr	5s_nonexpressed	2631838	2631961	+	124	93785
5SNONexpr	5s_nonexpressed	2772362	2772480	-	119	140400
5SNONexpr	5s_nonexpressed	3032685	3032786	+	102	260204
5SNONexpr	5s_nonexpressed	3154902	3155016	+	115	122115
5SNONexpr	5s_nonexpressed	3266900	3267021	-	122	111883
5SNONexpr	5s_nonexpressed	3294033	3294151	-	119	27011
5SNONexpr	5s_nonexpressed	3330262	3330385	+	124	36110
5SNONexpr	5s_nonexpressed	3437973	3438080	-	108	107587
5SNONexpr	5s_nonexpressed	3564253	3564377	-	125	126172
5SNONexpr	5s_nonexpressed	3834380	3834496	+	117	270002
5SNONexpr	5s_nonexpressed	3906935	3907041	-	107	72438
5SNONexpr	5s_nonexpressed	3968594	3968714	+	121	61552
5SNONexpr	5s_nonexpressed	4099662	4099773	+	112	130947
5SNONexpr	5s_nonexpressed	4264444	4264564	+	121	164670
5SNONexpr	5s_nonexpressed	4443858	4443964	+	107	179293
5SNONexpr	5s_nonexpressed	4657551	4657673	-	123	213586
5SNONexpr	5s_nonexpressed	4732694	4732811	+	118	75020
5SNONexpr	5s_nonexpressed	4895738	4895845	-	108	162926
5SNONexpr	5s_nonexpressed	4895920	4896033	+	114	74
5SNONexpr	5s_nonexpressed	4913205	4913329	-	125	17171
5SNONexpr	5s_nonexpressed	5520429	5520542	-	114	607099
5SNONexpr	5s_nonexpressed	5597399	5597511	+	113	76856
5SNONexpr	5s_nonexpressed	5761663	5761775	-	113	164151
5SNONexpr	5s_nonexpressed	6030658	6030778	-	121	268882
5SNONexpr	5s_nonexpressed	6031317	6031433	+	117	538
5SNONexpr	5s_nonexpressed	6108511	6108631	+	121	77077
5SNONexpr	5s_nonexpressed	6177872	6177989	-	118	69240
5SNONexpr	5s_nonexpressed	6225157	6225281	-	125	47167
5SNONexpr	5s_nonexpressed	6384413	6384519	+	107	159131
5SNONexpr	5s_nonexpressed	6570936	6571057	+	122	186416
5SNONexpr	5s_nonexpressed	6708973	6709097	+	125	137915
5SNONexpr	5s_nonexpressed	6779707	6779830	-	124	70609
5SNONexpr	5s_nonexpressed	7234875	7234996	+	122	455044
5SNONexpr	5s_nonexpressed	7265540	7265665	-	126	30543
5SNONexpr	5s_nonexpressed	7461940	7462063	+	124	196274
5SNONexpr	5s_nonexpressed	7757198	7757314	+	117	295134
5SNONexpr	5s_nonexpressed	7853466	7853580	-	115	96151
5SNONexpr	5s_nonexpressed	7917092	7917213	+	122	63511
5SNONexpr	5s_nonexpressed	7939797	7939906	-	110	22583
5SNONexpr	5s_nonexpressed	7969321	7969426	+	106	29414
5SNONexpr	5s_nonexpressed	8041147	8041268	+	122	71720
5SNONexpr	5s_nonexpressed	8088257	8088382	+	126	46988
5SNONexpr	5s_nonexpressed	8150268	8150389	+	122	61885
5SNONexpr	5s_nonexpressed	8171607	8171716	-	110	21217
5SNONexpr	5s_nonexpressed	8378507	8378633	+	127	206790
5SNONexpr	5s_nonexpressed	8439190	8439307	+	118	60556
5SNONexpr	5s_nonexpressed	8564875	8564995	-	121	125567
5SNONexpr	5s_nonexpressed	8592896	8593018	+	123	27900
5SNONexpr	5s_nonexpressed	9006405	9006525	-	121	413386
5SNONexpr	5s_nonexpressed	9132976	9133091	-	116	126450
5SNONexpr	5s_nonexpressed	9153797	9153920	+	124	20705
5SNONexpr	5s_nonexpressed	9266399	9266511	+	113	112478
5SNONexpr	5s_nonexpressed	9638726	9638859	+	134	372214
5SNONexpr	5s_nonexpressed	9651302	9651419	+	118	12442
5SNONexpr	5s_nonexpressed	9654603	9654709	+	107	3183
5SNONexpr	5s_nonexpressed	9835157	9835266	-	110	180447
5SNONexpr	5s_nonexpressed	9841830	9841962	+	133	6563
5SNONexpr	5s_nonexpressed	9953500	9953623	-	124	111537
5SNONexpr	5s_nonexpressed	10111256	10111377	-	122	157632
5SNONexpr	5s_nonexpressed	10472624	10472744	-	121	361246
5SNONexpr	5s_nonexpressed	10529352	10529468	-	117	56607
5SNONexpr	5s_nonexpressed	10592391	10592513	+	123	62922
5SNONexpr	5s_nonexpressed	10658614	10658738	+	125	66100
5SNONexpr	5s_nonexpressed	10773329	10773445	+	117	114590
5SNONexpr	5s_nonexpressed	10937812	10937925	-	114	164366
5SNONexpr	5s_nonexpressed	11119237	11119352	-	116	181311
5SNONexpr	5s_nonexpressed	11364518	11364622	+	105	245165
5SNONexpr	5s_nonexpressed	11488495	11488614	+	120	123872
5SNONexpr	5s_nonexpressed	11862188	11862309	+	122	373573
5SNONexpr	5s_nonexpressed	12473027	12473150	-	124	610717
5SNONexpr	5s_nonexpressed	12563327	12563444	-	118	90176
5SNONexpr	5s_nonexpressed	12569477	12569602	-	126	6032
5SNONexpr	5s_nonexpressed	12623634	12623751	-	118	54031
5SNONexpr	5s_nonexpressed	12976902	12977010	-	109	353150
5SNONexpr	5s_nonexpressed	13138098	13138215	-	118	161087
5SNONexpr	5s_nonexpressed	13559343	13559466	+	124	421127
5SNONexpr	5s_nonexpressed	13575731	13575855	-	125	16264
5SNONexpr	5s_nonexpressed	13760394	13760521	-	128	184538
5SNONexpr	5s_nonexpressed	13980300	13980412	+	113	219778
5SNONexpr	5s_nonexpressed	14052856	14052975	-	120	72443
5SNONexpr	5s_nonexpressed	14443983	14444108	-	126	391007
5SNONexpr	5s_nonexpressed	14583786	14583903	+	118	139677
5SNONexpr	5s_nonexpressed	14752711	14752826	+	116	168807
5SNONexpr	5s_nonexpressed	14988967	14989075	-	109	236140
5SNONexpr	5s_nonexpressed	15067639	15067757	-	119	78563
5SNONexpr	5s_nonexpressed	15248099	15248216	+	118	180341
5SNONexpr	5s_nonexpressed	15619565	15619689	-	125	371348
5SNONexpr	5s_nonexpressed	15907150	15907268	-	119	287460
5SNONexpr	5s_nonexpressed	16091457	16091572	+	116	184188
5SNONexpr	5s_nonexpressed	16201086	16201202	-	117	109513
5SNONexpr	5s_nonexpressed	16791009	16791127	-	119	589806
5SNONexpr	5s_nonexpressed	16908480	16908590	+	111	117352
5SNONexpr	5s_nonexpressed	17072190	17072303	-	114	163599
5SNONexpr	5s_nonexpressed	17422536	17422653	-	118	350232
5SNONexpr	5s_nonexpressed	17686274	17686390	+	117	263620
5SNONexpr	5s_nonexpressed	18050108	18050233	-	126	363717
5SNONexpr	5s_nonexpressed	18101481	18101586	-	106	51247
5SNONexpr	5s_nonexpressed	18262436	18262556	+	121	160849
5SNONexpr	5s_nonexpressed	18650085	18650209	-	125	387528
5SNONexpr	5s_nonexpressed	18671627	18671749	+	123	21417
5SNONexpr	5s_nonexpressed	18711780	18711903	+	124	40030
5SNONexpr	5s_nonexpressed	18736907	18737034	+	128	25003
5SNONexpr	5s_nonexpressed	18759257	18759383	+	127	22222
5SNONexpr	5s_nonexpressed	18803112	18803234	+	123	43728
5SNONexpr	5s_nonexpressed	18831291	18831413	+	123	28056
5SNONexpr	5s_nonexpressed	18966273	18966398	-	126	134859
5SNONexpr	5s_nonexpressed	19385771	19385886	-	116	419372
5SNONexpr	5s_nonexpressed	19433945	19434062	-	118	48058
5SNONexpr	5s_nonexpressed	19717935	19718044	+	110	283872
5SNONexpr	5s_nonexpressed	19748590	19748710	+	121	30545
5SNONexpr	5s_nonexpressed	19943078	19943199	+	122	194367
5SNONexpr	5s_nonexpressed	20224909	20225019	+	111	281709
5SNONexpr	5s_nonexpressed	20229168	20229293	-	126	4148
5SNONexpr	5s_nonexpressed	20644723	20644857	-	135	415429
5SNONexpr	5s_nonexpressed	20703743	20703868	+	126	58885
5SNONexpr	5s_nonexpressed	20857124	20857247	-	124	153255
5SNONexpr	5s_nonexpressed	20906905	20907025	+	121	49657
5SNONexpr	5s_nonexpressed	21110474	21110579	-	106	203448
5SNONexpr	5s_nonexpressed	21202599	21202718	+	120	92019
5SNONexpr	5s_nonexpressed	21231635	21231756	+	122	28916
5SNONexpr	5s_nonexpressed	22094706	22094823	-	118	862949
5SNONexpr	5s_nonexpressed	22184219	22184340	-	122	89395
5SNONexpr	5s_nonexpressed	22239148	22239261	+	114	54807
5SNONexpr	5s_nonexpressed	22265155	22265268	-	114	25893
5SNONexpr	5s_nonexpressed	22446905	22447013	-	109	181636
5SNONexpr	5s_nonexpressed	22782394	22782504	-	111	335380
5SNONexpr	5s_nonexpressed	22886956	22887079	+	124	104451
5SNONexpr	5s_nonexpressed	23010551	23010655	+	105	123471
5SNONexpr	5s_nonexpressed	23483085	23483194	+	110	472429
5SNONexpr	5s_nonexpressed	23990334	23990447	-	114	507139
5SNONexpr	5s_nonexpressed	24329649	24329767	-	119	339201
5SNONexpr	5s_nonexpressed	24525123	24525246	-	124	195355
5SNONexpr	5s_nonexpressed	24628325	24628441	+	117	103078
5SNONexpr	5s_nonexpressed	24790602	24790725	-	124	162160
5SNONexpr	5s_nonexpressed	25172122	25172244	-	123	381396
5SNONexpr	5s_nonexpressed	26003165	26003274	+	110	830920
5SNONexpr	5s_nonexpressed	26051812	26051935	+	124	48537
5SNONexpr	5s_nonexpressed	26205051	26205174	-	124	153115
5SNONexpr	5s_nonexpressed	26642648	26642777	-	130	437473
5SNONexpr	5s_nonexpressed	26765435	26765556	+	122	122657
5SNONexpr	5s_nonexpressed	27154487	27154604	-	118	388930
5SNONexpr	5s_nonexpressed	27213834	27213946	+	113	59229
5SNONexpr	5s_nonexpressed	27257074	27257186	+	113	43127
5SNONexpr	5s_nonexpressed	27324544	27324664	-	121	67357
5SNONexpr	5s_nonexpressed	27352563	27352681	-	119	27898
5SNONexpr	5s_nonexpressed	27520184	27520305	-	122	167502
5SNONexpr	5s_nonexpressed	27758461	27758603	+	143	238155
5SNONexpr	5s_nonexpressed	28175316	28175431	+	116	416712
5SNONexpr	5s_nonexpressed	28379525	28379647	-	123	204093
5SNONexpr	5s_nonexpressed	29106085	29106209	-	125	726437
5SNONexpr	5s_nonexpressed	29196843	29196953	+	111	90633
5SNONexpr	5s_nonexpressed	29234879	29234994	-	116	37925
5SNONexpr	5s_nonexpressed	29312636	29312740	-	105	77641
5SNONexpr	5s_nonexpressed	29329264	29329384	-	121	16523
5SNONexpr	5s_nonexpressed	29613440	29613544	-	105	284055
5SNONexpr	5s_nonexpressed	29634248	29634380	-	133	20703
5Sseq87	5s_expressed	30047727	30047845	-	119	413346
5Sseq87	5s_expressed	30053920	30054038	-	119	6074
5Sseq87	5s_expressed	30055886	30056004	-	119	1847
5Sseq87	5s_expressed	30058913	30059031	-	119	2908
5Sseq87	5s_expressed	30060882	30061000	-	119	1850
MutsuDr S1	LINE	30062948	30068425	-	5478	1947
5Sseq87	5s_expressed	30070304	30070422	-	119	1878
5Sseq87	5s_expressed	30072266	30072384	-	119	1843
5Sseq87	5s_expressed	30074236	30074354	-	119	1851
5Sseq87	5s_expressed	30076195	30076313	-	119	1840
MutsuDr S1	LINE	30078261	30083738	-	5478	1947
5Sseq87	5s_expressed	30086667	30086785	-	119	2928
5Sseq87	5s_expressed	30088627	30088745	-	119	1841
5Sseq87	5s_expressed	30092777	30092895	-	119	4031
MutsuDr S2	LINE	30097761	30103427	-	5667	4865
5SNONexpr	5s_nonexpressed	30341100	30341217	+	118	237672
5SNONexpr	5s_nonexpressed	30827212	30827329	-	118	485994
5SNONexpr	5s_nonexpressed	32207144	32207265	-	122	1379814
5SNONexpr	5s_nonexpressed	32628788	32628906	-	119	421522
5SNONexpr	5s_nonexpressed	34317602	34317718	+	117	1688695
5SNONexpr	5s_nonexpressed	34838511	34838631	-	121	520792
5SNONexpr	5s_nonexpressed	35201310	35201420	+	111	362678
5SNONexpr	5s_nonexpressed	35598335	35598458	-	124	396914
5SNONexpr	5s_nonexpressed	35660478	35660588	-	111	62019
5SNONexpr	5s_nonexpressed	35825840	35825958	+	119	165251
5SNONexpr	5s_nonexpressed	35838441	35838562	+	122	12482
5SNONexpr	5s_nonexpressed	35932366	35932488	-	123	93803
5SNONexpr	5s_nonexpressed	37198545	37198669	-	125	1266056
5SNONexpr	5s_nonexpressed	37203299	37203420	-	122	4629
5SNONexpr	5s_nonexpressed	37325738	37325858	-	121	122317
5SNONexpr	5s_nonexpressed	37477440	37477554	+	115	151581
5SNONexpr	5s_nonexpressed	37710115	37710232	-	118	232560
5SNONexpr	5s_nonexpressed	37981770	37981889	+	120	271537
5SNONexpr	5s_nonexpressed	38036893	38037010	+	118	55003
5SNONexpr	5s_nonexpressed	38164514	38164631	-	118	127503
5SNONexpr	5s_nonexpressed	38186173	38186283	+	111	21541
5SNONexpr	5s_nonexpressed	38320794	38320911	+	118	134510
5SNONexpr	5s_nonexpressed	38470730	38470853	+	124	149818
5SNONexpr	5s_nonexpressed	39171723	39171835	-	113	700869
5SNONexpr	5s_nonexpressed	39605531	39605657	-	127	433695
5SNONexpr	5s_nonexpressed	39634767	39634897	-	131	29109
5SNONexpr	5s_nonexpressed	39756409	39756527	+	119	121511
5SNONexpr	5s_nonexpressed	39786759	39786881	-	123	30231
5SNONexpr	5s_nonexpressed	40028862	40028978	+	117	241980
5SNONexpr	5s_nonexpressed	40033585	40033696	+	112	4606
5SNONexpr	5s_nonexpressed	41677992	41678124	+	133	1644295
5SNONexpr	5s_nonexpressed	41722882	41722998	+	117	44757
5SNONexpr	5s_nonexpressed	41872600	41872712	-	113	149601
5SNONexpr	5s_nonexpressed	41904321	41904426	+	106	31608
5SNONexpr	5s_nonexpressed	41931619	41931720	+	102	27192
5SNONexpr	5s_nonexpressed	42002503	42002626	-	124	70782
5SNONexpr	5s_nonexpressed	42415515	42415638	+	124	412888
5SNONexpr	5s_nonexpressed	42521850	42521963	+	114	106211
5SNONexpr	5s_nonexpressed	42677400	42677503	+	104	155436
5SNONexpr	5s_nonexpressed	42975890	42976004	+	115	298386
5SNONexpr	5s_nonexpressed	43692312	43692429	-	118	716307
5SNONexpr	5s_nonexpressed	44013119	44013234	+	116	320689
5SNONexpr	5s_nonexpressed	44125683	44125808	+	126	112448
5SNONexpr	5s_nonexpressed	44438161	44438284	+	124	312352
5SNONexpr	5s_nonexpressed	44458559	44458683	-	125	20274
5SNONexpr	5s_nonexpressed	44521385	44521495	-	111	62701
5SNONexpr	5s_nonexpressed	44821005	44821120	-	116	299509
5SNONexpr	5s_nonexpressed	44977236	44977355	+	120	156115
5SNONexpr	5s_nonexpressed	45057380	45057497	+	118	80024
5SNONexpr	5s_nonexpressed	45262028	45262150	+	123	204530
5SNONexpr	5s_nonexpressed	45300773	45300884	+	112	38622
5SNONexpr	5s_nonexpressed	45623717	45623831	+	115	322832
5SNONexpr	5s_nonexpressed	45657398	45657524	+	127	33566
5SNONexpr	5s_nonexpressed	45710965	45711067	-	103	53440
5SNONexpr	5s_nonexpressed	45744567	45744679	-	113	33499
5SNONexpr	5s_nonexpressed	45772694	45772816	-	123	28014
5SNONexpr	5s_nonexpressed	45932740	45932861	+	122	159923
5SNONexpr	5s_nonexpressed	45976131	45976248	-	118	43269
5SNONexpr	5s_nonexpressed	46115734	46115853	-	120	139485
5SNONexpr	5s_nonexpressed	46331151	46331253	-	103	215297
5SNONexpr	5s_nonexpressed	46375988	46376111	-	124	44734
5SNONexpr	5s_nonexpressed	46402247	46402357	-	111	26135
5SNONexpr	5s_nonexpressed	46579003	46579121	+	119	176645
5SNONexpr	5s_nonexpressed	46788823	46788939	+	117	209701
5SNONexpr	5s_nonexpressed	47049756	47049871	-	116	260816
5SNONexpr	5s_nonexpressed	47760482	47760599	-	118	710610
5SNONexpr	5s_nonexpressed	47825198	47825312	-	115	64598
5SNONexpr	5s_nonexpressed	47836221	47836338	-	118	10908
5SNONexpr	5s_nonexpressed	48063372	48063489	-	118	227033
5SNONexpr	5s_nonexpressed	48443796	48443923	+	128	380306
5SNONexpr	5s_nonexpressed	48448888	48449006	-	119	4964
5SNONexpr	5s_nonexpressed	48502299	48502416	-	118	53292
5SNONexpr	5s_nonexpressed	48633235	48633352	-	118	130818
5SNONexpr	5s_nonexpressed	48793735	48793848	+	114	160382
5SNONexpr	5s_nonexpressed	48911094	48911213	-	120	117245
5SNONexpr	5s_nonexpressed	48930035	48930157	-	123	18821
5SNONexpr	5s_nonexpressed	49704144	49704257	-	114	773986
5SNONexpr	5s_nonexpressed	50769768	50769889	-	122	1065510
5SNONexpr	5s_nonexpressed	50796956	50797067	+	112	27066
