# Supplementary material
Source: HighWire-hosted journal article supplement (doi:10.1101/rna.059642.116)
Supplement: Supplemental_Table_S5.xlsx [file Supplemental_Table_S5.xlsx]

## Sheet: A; Total Mutsu reads
Supplementary Table S5-A: RNA-seq read counts of MutsuDr
	Egg pool	Single embryo													Adult-female
ID	egg	64 cells (2 hpf)	high stage (3.3 hpf)	30% epiboly stage (4.7 hpf)	70% epiboly stage (7 hpf)	90% epiboly stage (9 hpf)	4-somite stage (11.3 hpf)	12-somite stage (15 hpf)	22-somite stage (20 hpf)	prim-5 stage (24 hpf)	prim-16 stage (31 hpf)	long-pec stage (48 hpf)	protruding-mouth stage (72 hpf)	embryo total	tail
Absolute read count
MutsuDr RNA total	0	0	7	6	1	1	4	19	7	4	10	5	24	88	6
Relative read count: percentage normalized on reads size >70 nt.
MutsuDr RNA total	0	0	0.000250482	0.000142167	2.67564e-05	2.557e-05	9.26931e-05	0.000467538	0.000227681	9.30098e-05	0.000216248	0.000129409	0.000123599	0.000146334	6.43104e-05
Relative read count: fraction of total MutsuDR RNA read count after normalization
MutsuDr RNA total	0													0.694697	0.305303
Number of reads
Reads >70 nt.	36352086	2892063	2794614	4220395	3737424	3910838	3236487	4063838	3074480	4300622	4624317	3863707	19417628	60136413	9329751
Total number of reads	48098559	3451573	3512248	4903481	4424058	4904291	4133196	4843104	4063942	4872369	5457079	5737354	28978873	79281568	9757587

## Sheet: B; Total specific Mutsu
Supplementary Table S5-B: RNA-seq read counts per specifc MutsuDr subfamily
	Egg pool	Single embryo													Adult-female	Total
ID	egg	64 cells (2 hpf)	high stage (3.3 hpf)	30% epiboly stage (4.7 hpf)	70% epiboly stage (7 hpf)	90% epiboly stage (9 hpf)	4-somite stage (11.3 hpf)	12-somite stage (15 hpf)	22-somite stage (20 hpf)	prim-5 stage (24 hpf)	prim-16 stage (31 hpf)	long-pec stage (48 hpf)	protruding-mouth stage (72 hpf)	embryo total	tail	Total
Absolute read count per MutsuDr subfamily
MutsuDr1 RNA	0	0	1	0	0	0	0	0	3	1	0	1	1	7	0	7	0.142857
MutsuDr2 RNA	0	0	0	0	1	0	0	0	0	0	0	0	0	1	0	1	0.0204082
MutsuDr3 RNA	0	0	0	2	0	0	0	4	1	1	3	1	4	16	0	16	0.326531
MutsuDr4 RNA	0	0	0	0	0	0	0	3	0	0	4	1	2	10	1	11	0.22449
MutsuDr5 RNA	0	0	1	0	0	0	0	0	0	0	0	0	3	4	0	4	0.0816327
MutsuDr6 RNA	0	0	0	0	0	0	0	1	0	0	1	0	0	2	1	3	0.0612245
MutsuDr7 RNA	0	0	0	0	0	0	0	1	1	0	0	1	0	3	0	3	0.0612245
MutsuDrS2 RNA	0	0	0	0	0	0	0	0	0	0	0	0	0	0	0	0	0
MutsuDrS3 RNA	0	0	0	1	0	0	0	0	0	1	0	0	0	2	2	4	0.0816327
MutsuDr RNA total	0	0	2	3	1	0	0	9	5	3	8	4	10	45	4	49
Relative read count: percentage normalized on reads size >70 nt.
MutsuDr1 RNA	0	0	3.57831e-05	0	0	0	0	0	9.75775e-05	2.32525e-05	0	2.58819e-05	5.14996e-06	1.16402e-05	0	4.21802e-06
MutsuDr2 RNA	0	0	0	0	2.67564e-05	0	0	0	0	0	0	0	0	1.66289e-06	0	6.02574e-07
MutsuDr3 RNA	0	0	0	4.73889e-05	0	0	0	9.84291e-05	3.25258e-05	2.32525e-05	6.48744e-05	2.58819e-05	2.05998e-05	2.66062e-05	0	9.64119e-06
MutsuDr4 RNA	0	0	0	0	0	0	0	7.38218e-05	0	0	8.64993e-05	2.58819e-05	1.02999e-05	1.66289e-05	1.07184e-05	6.62832e-06
MutsuDr5 RNA	0	0	3.57831e-05	0	0	0	0	0	0	0	0	0	1.54499e-05	6.65154e-06	0	2.4103e-06
MutsuDr6 RNA	0	0	0	0	0	0	0	2.46073e-05	0	0	2.16248e-05	0	0	3.32577e-06	1.07184e-05	1.80772e-06
MutsuDr7 RNA	0	0	0	0	0	0	0	2.46073e-05	3.25258e-05	0	0	2.58819e-05	0	4.98866e-06	0	1.80772e-06
MutsuDrS2 RNA	0	0	0	0	0	0	0	0	0	0	0	0	0	0	0	0
MutsuDrS3 RNA	0	0	0	2.36945e-05	0	0	0	0	0	2.32525e-05	0	0	0	3.32577e-06	2.14368e-05	2.4103e-06
MutsuDr RNA total	0	0	7.15662e-05	7.10834e-05	2.67564e-05	0	0	0.000221466	0.000162629	6.97574e-05	0.000172999	0.000103528	5.14996e-05	7.48299e-05	4.28736e-05	2.95261e-05
Number of reads
Reads >70 nt.	36352086	2892063	2794614	4220395	3737424	3910838	3236487	4063838	3074480	4300622	4624317	3863707	19417628	60136413	9329751	165954663
Total number of reads	48098559	3451573	3512248	4903481	4424058	4904291	4133196	4843104	4063942	4872369	5457079	5737354	28978873	79281568	9757587	216419282
