# Supplementary material
Source: HighWire-hosted journal article supplement (doi:10.1101/rna.059642.116)
Supplement: Supplemental_Table_S6.xlsx [file Supplemental_Table_S6.xlsx]

## Sheet: A; Total Mutsu reads
Supplementary Table ST6-A: Small-RNA-seq read counts of piRNAs that target MutsuDr retrotransposons
	Egg pool	Single embryo													Adult-female
ID	egg	64 cells (2 hpf)	high stage (3.3 hpf)	30% epiboly stage (4.7 hpf)	70% epiboly stage (7 hpf)	90% epiboly stage (9 hpf)	4-somite stage (11.3 hpf)	12-somite stage (15 hpf)	22-somite stage (20 hpf)	prim-5 stage (24 hpf)	prim-16 stage (31 hpf)	long-pec stage (48 hpf)	protruding-mouth stage (72 hpf)	embryo total	tail
Absolute read count
MutsuDr piRNA total	41545	2076	1964	1246	1867	843	1803	871	1851	2972	2774	1658	916	20841	5
Relative read count: percentage normalized on reads size 28-32 nt.
MutsuDr piRNA total	0.61	1.15	0.6	0.78	1.05	0.73	0.91	0.74	1	0.57	0.73	0.69	0.48	0.745287	0.00174172
Relative read count: fraction of total MutsuDR RNA read count after normalization
MutsuDr piRNA total	0.449511													0.549205	0.00128348
Number of reads
Reads size 28-32 nt.	6777907	181117	330072	158996	177757	116119	198943	117814	185539	517132	381168	238929	192786	2796372	287073
Total number of reads	50945601	1396009	3376105	7452991	1840126	3386443	4443685	2713759	4495080	6246071	5026564	5197273	3062463	48636569	7690105

## Sheet: B; Total specific Mutsu
Supplementary Table ST6-B: Small-RNA-seq read counts of piRNAs that target specifc retrotransposon MutsuDr subfamilies
	Egg pool	Single embryo													Adult-female	Total
ID	egg	64 cells (2 hpf)	high stage (3.3 hpf)	30% epiboly stage (4.7 hpf)	70% epiboly stage (7 hpf)	90% epiboly stage (9 hpf)	4-somite stage (11.3 hpf)	12-somite stage (15 hpf)	22-somite stage (20 hpf)	prim-5 stage (24 hpf)	prim-16 stage (31 hpf)	long-pec stage (48 hpf)	protruding-mouth stage (72 hpf)	embryo total	tail	Total
Absolute read count per MutsuDr subfamily
MutsuDr1 piRNA	7499	456	433	269	373	201	334	194	395	628	552	289	301	4425	0	11924	0.283905
MutsuDr2 piRNA	241	29	25	27	27	10	22	12	43	90	70	153	54	562	0	803	0.019119
MutsuDr3 piRNA	5439	118	90	73	98	51	107	47	95	197	177	223	124	1400	0	6839	0.162833
MutsuDr4 piRNA	5913	530	603	289	446	170	501	159	443	323	505	346	366	4681	1	10595	0.252262
MutsuDr5 piRNA	1235	59	42	41	61	19	55	25	76	109	92	79	47	705	0	1940	0.0461905
MutsuDr6 piRNA	1111	99	99	94	86	37	80	54	88	242	243	95	101	1318	0	2429	0.0578333
MutsuDr7 piRNA	978	247	209	133	256	102	162	122	238	424	334	182	190	2599	0	3577	0.0851667
MutsuDrS2 piRNA	95	23	6	6	12	6	9	4	10	19	10	108	6	219	0	314	0.00747619
MutsuDrS3 piRNA	2464	78	88	56	79	57	109	42	62	173	109	183	79	1115	0	3579	0.0852143
MutsuDr RNA total	24975	1639	1595	988	1438	653	1379	659	1450	2205	2092	1658	1268	17024	1	42000
Relative read count: percentage normalized on reads size 28-32 nt.
MutsuDr1 piRNA	0.110639	0.251771	0.131183	0.169187	0.209837	0.173098	0.167887	0.164666	0.212893	0.121439	0.144818	0.120956	0.156132	0.158241	0	0.120916
MutsuDr2 piRNA	0.00355567	0.0160117	0.00757411	0.0169816	0.0151893	0.00861186	0.0110584	0.0101855	0.0231757	0.0174037	0.0183646	0.0640358	0.0280103	0.0200975	0	0.0081429
MutsuDr3 piRNA	0.080246	0.0651513	0.0272668	0.0459131	0.0551314	0.0439205	0.0537842	0.0398934	0.0512022	0.0380947	0.0464362	0.0933332	0.06432	0.0500649	0	0.0693515
MutsuDr4 piRNA	0.0872393	0.292629	0.182687	0.181766	0.250904	0.146402	0.251831	0.134958	0.238764	0.0624599	0.132488	0.144813	0.189848	0.167395	0.000348343	0.10744
MutsuDr5 piRNA	0.018221	0.0325756	0.0127245	0.0257868	0.0343165	0.0163625	0.0276461	0.0212199	0.0409617	0.0210778	0.0241363	0.0330642	0.0243794	0.0252112	0	0.0196728
MutsuDr6 piRNA	0.0163915	0.0546608	0.0299935	0.059121	0.0483807	0.0318639	0.0402125	0.045835	0.0474294	0.0467966	0.0637514	0.0397608	0.0523897	0.0471325	0	0.0246315
MutsuDr7 piRNA	0.0144292	0.136376	0.0633195	0.0836499	0.144017	0.0878409	0.0814304	0.103553	0.128275	0.0819907	0.0876254	0.0761733	0.0985549	0.0929419	0	0.0362729
MutsuDrS2 piRNA	0.00140161	0.012699	0.00181779	0.00377368	0.00675079	0.00516711	0.00452391	0.00339518	0.0053897	0.00367411	0.00262352	0.0452017	0.00311226	0.00783158	0	0.00318415
MutsuDrS3 piRNA	0.0363534	0.0430661	0.0266608	0.035221	0.0444427	0.0490876	0.0547896	0.0356494	0.0334162	0.0334537	0.0285963	0.0765918	0.0409781	0.0398731	0	0.0362932
MutsuDr RNA total	0.368477	0.90494	0.483228	0.621399	0.80897	0.562354	0.693163	0.559356	0.781507	0.42639	0.548839	0.69393	0.657724	0.608789	0.000348343	0.425905
Number of reads
Reads size 28-32 nt.	6777907	181117	330072	158996	177757	116119	198943	117814	185539	517132	381168	238929	192786	2796372	287073	9861352
Total number of reads	50945601	1396009	3376105	7452991	1840126	3386443	4443685	2713759	4495080	6246071	5026564	5197273	3062463	48636569	7690105	107272275
