# Supplementary material
Source: HighWire-hosted journal article supplement (doi:10.1101/rna.059642.116)
Supplement: Supplemental_Table_S7.xlsx [file Supplemental_Table_S7.xlsx]

## Sheet: Table S7
Supplementary Table S7: PCR primers and Northern blot DNA probes
Primer sequence	Target gene	Type
GCCATACCACCCTGGAAAT	5S maternal	PCR Forward primer
CCATACCACCCTGAGCAC	5S somatic	PCR Forward primer
ACAGCACCTGGTATTCCC	5S maternal and somatic	PCR Reverse primer
TTACGGCCATACCACCCT	5S common region	PCR Forward primer
CAAGTACTAACCAGGCCCGA	5S common region	PCR Reverse primer
CTTACAGCACCTGGTATTCC	5S common region	Reverse transcription primer
TGCAGTAAAGGGACAAGCTG	p53	PCR Forward primer
TCATGCAGCCATCTTAGAGC	p53	PCR Reverse primer
GTAGTTCCGACCGTAAACG	18S	PCR Forward primer
AAAGACTCGTGGTTTCCCG	18S	PCR Reverse primer
GTTGAGTCAAATTAAGCCG	18S	Reverse transcription primer
AAGCTTACAGCACCTGGTATTCCCAGGCGGTCTCCCATCCAAGTACTAAC	5S common region	Northern blot probe
CCCTGCTTTACTTCCGAGTTCAGATGAGATCGGGCATTTCCAGGGTGGTA	5S maternal	Northern blot probe
GAGaTCGGAcGAGATCGGGCgTGcT*	5S somatic	Northern blot probe
*lower case indicates locked nucleic acids (LNA)
